# Supplementary material for: Translation initiation downstream from annotated start codons in human mRNAs coevolves with the Kozak context
Source: Genome Res. 2020 Jul;30(7):974–84. doi: 10.1101/gr.257352.119 (PMC7397870; doi:10.1101/gr.257352.119)
Supplement: Supplemental Material [file supp_gr.257352.119_Supplemental_Table_S1.xlsx]

## Sheet: Supplemental_Table_S1
Supplemental Table S1. “Strong” set. Constituted by 10% of the mRNAs with the highest translation initiation context efficiency values.
* 0-based coordinates in mRNA sequence ** From CDS_start (0-based)
mRNA_ID	protein_ID	Gene_symbols	CDS_start *	CDS_end *	fdAUG_start **	fdAUG_frame	sAUG_TIE	fdAUG_TIE	sAUG_ORF_length_aa	fdAUG_ORF_length_aa
NM_000019.3	NP_000010.1	ACAT1	76	1360	82	1	114	90	427	11
NM_000042.2	NP_000033.2	APOH	59	1097	43	1	114	104	345	22
NM_000373.3	NP_000364.1	UMPS	106	1549	187	1	114	117	480	46
NM_000760.3	NP_000751.1	CSF3R	584	3095	238	1	114	83	836	23
NM_000788.2	NP_000779.1	DCK	288	1071	170	2	114	64	260	9
NM_001002926.1	NP_001002926.1	POLR1F, TWISTNB	21	1038	46	1	114	83	338	4
NM_001009894.2	NP_001009894.2	C12orf29	158	1136	30	0	114	77	325	315
NM_001010911.2	NP_001010911.1	MIR1915HG, CASC10	470	881	316	1	114	58	136	41
NM_001010926.3	NP_001010926.1	HES5	81	582	78	0	114	90	166	140
NM_001012729.1	NP_001012747.1	DUXA	45	660	27	0	114	83	204	195
NM_001014765.1	NP_001014765.1	FBXO44	498	1266	289	1	114	57	255	1
NM_001015001.2	NP_001015001.1	CKMT1A	492	1746	186	0	114	65	417	355
NM_001039752.3	NP_001034841.3	SLC22A10	208	1834	51	0	114	66	541	524
NM_001042664.1	NP_001036129.1	PLEKHG5	223	3244	7	1	114	102	1006	54
NM_001080426.2	NP_001073895.1	STYXL2, DUSP27	121	3598	117	0	114	45	1158	1119
NM_001128830.3	NP_001122302.1	CA1	210	996	22	1	114	84	261	37
NM_001142633.2	NP_001136105.1	PIK3R5	130	2773	20	2	114	99	880	52
NM_001145648.1	NP_001139120.1	RASGRF1	375	4149	22	1	114	49	1257	21
NM_001164380.1	NP_001157852.1	STAU2	341	2054	27	0	114	86	570	561
NM_001190880.2	NP_001177809.1	HYI	196	1030	219	0	114	102	277	204
NM_001242617.1	NP_001229546.1	NXT2	177	606	28	1	114	68	142	1
NM_001261408.1	NP_001248337.1	BCAR3	289	2767	36	0	114	76	825	813
NM_001270550.1	NP_001257479.1	MDK	401	833	283	1	114	97	143	12
NM_001272036.1	NP_001258965.1	LRRC14	255	1737	117	0	114	66	493	454
NM_001280542.1	NP_001267471.1	DPF3	28	1165	168	0	114	51	378	322
NM_001297.4	NP_001288.3	CNGB1	65	3821	60	0	114	122	1251	1231
NM_001320646.1	NP_001307575.1	U2AF1L5	112	835	77	2	114	81	240	12
NM_001445.2	NP_001436.1	FABP6	128	515	24	0	114	79	128	120
NM_001727.1	NP_001718.1	BRS3	149	1349	52	1	114	107	399	26
NM_002477.1	NP_002468.1	MYL5	105	627	64	1	114	83	173	33
NM_002615.6	NP_002606.3	SERPINF1	197	1454	187	1	114	96	418	49
NM_002623.3	NP_002614.2	PFDN4	138	543	12	0	114	97	134	130
NM_002709.2	NP_002700.1	PPP1CB	365	1349	59	2	114	100	327	10
NM_002710.3	NP_002701.1	PPP1CC	271	1243	79	1	114	76	323	13
NM_002718.4	NP_002709.2	PPP2R3A	617	4070	118	1	114	75	1150	28
NM_002759.3	NP_002750.1	EIF2AK2	557	2213	30	0	114	57	551	541
NM_003296.3	NP_003287.1	CRISP2	266	998	133	1	114	83	243	2
NM_003372.6	NP_003363.1	VBP1	59	653	36	0	114	110	197	185
NM_003609.4	NP_003600.2	HIRIP3	491	2162	18	0	114	100	556	550
NM_003945.3	NP_003936.1	ATP6V0E1	101	347	36	0	114	76	81	69
NM_004162.4	NP_004153.2	RAB5A	535	1183	53	2	114	74	215	28
NM_004493.2	NP_004484.1	HSD17B10	31	817	208	1	114	83	261	7
NM_004529.3	NP_004520.2	MLLT3	287	1994	96	0	114	39	568	536
NM_004553.4	NP_004544.1	NDUFS6	36	411	12	0	114	100	124	120
NM_004961.3	NP_004952.2	GABRE	54	1575	85	1	114	77	506	46
NM_005023.3	NP_005014.2	PGGT1B	21	1155	16	1	114	86	377	3
NM_005260.5	NP_005251.1	GDF9	828	2193	132	0	114	65	454	410
NM_005439.2	NP_005430.1	MLF2	63	810	12	0	114	54	248	244
NM_006062.2	NP_006053.2	SMYD5	29	1286	12	0	114	80	418	414
NM_006379.4	NP_006370.1	SEMA3C	562	2818	100	1	114	36	751	18
NM_006470.4	NP_006461.3	TRIM16	629	2324	18	0	114	105	564	558
NM_006623.3	NP_006614.2	PHGDH	227	1829	73	1	114	86	533	16
NM_006706.3	NP_006697.2	TCERG1	40	3337	60	0	114	131	1098	1078
NM_006909.2	NP_008840.1	RASGRF2	50	3764	145	1	114	90	1237	88
NM_012087.3	NP_036219.2	GTF3C5	337	1897	69	0	114	47	519	496
NM_012249.3	NP_036381.2	RHOQ	319	937	24	0	114	66	205	197
NM_013255.4	NP_037387.2	MKLN1	64	2272	121	1	114	97	735	17
NM_013366.3	NP_037498.1	ANAPC2	73	2542	277	1	114	70	822	36
NM_013437.4	NP_038465.1	LRP12	127	2707	82	1	114	97	859	32
NM_014149.3	NP_054868.3	WDR91	62	2306	156	0	114	36	747	695
NM_014649.2	NP_055464.1	SAFB2	212	3074	168	0	114	77	953	897
NM_014752.2	NP_055567.2	SPCS2	39	720	124	1	114	61	226	4
NM_015024.4	NP_055839.3	XPO7	102	3366	10	1	114	86	1087	7
NM_015051.2	NP_055866.1	ERP44	212	1433	38	2	114	63	406	16
NM_015176.3	NP_055991.1	FBXO28	43	1150	24	0	114	93	368	360
NM_015196.3	NP_056011.3	TMEM131L, KIAA0922	52	4882	340	1	114	58	1609	12
NM_015284.3	NP_056099.3	SZT2	84	10212	57	0	114	41	3375	3356
NM_015509.3	NP_056324.2	NECAP1	78	906	292	1	114	85	275	32
NM_015531.5	NP_056346.3	C2CD3	227	6119	146	2	114	44	1963	34
NM_015710.4	NP_056525.2	NOP53, GLTSCR2	24	1461	49	1	114	65	478	17
NM_016199.2	NP_057283.1	LSM7	49	361	162	0	114	51	103	49
NM_016219.4	NP_057303.2	MAN1B1	73	2173	108	0	114	116	699	663
NM_016255.2	NP_057339.1	FAM8A1	123	1365	49	1	114	113	413	11
NM_016328.2	NP_057412.1	GTF2IRD1	393	3273	120	0	114	79	959	919
NM_016930.3	NP_058626.1	STX18	102	1110	94	1	114	100	335	24
NM_017489.2	NP_059523.2	TERF1	25	1345	10	1	114	99	439	111
NM_017681.2	NP_060151.2	NUP62CL	259	814	213	0	114	88	184	113
NM_017776.2	NP_060246.2	KRBOX4	299	800	6	0	114	90	166	164
NM_018660.2	NP_061130.1	ZNF395	126	1668	148	1	114	80	513	54
NM_018706.6	NP_061176.3	DHTKD1	117	2877	160	1	114	125	919	6
NM_018717.4	NP_061187.2	MAML3	752	4154	34	1	114	109	1133	10
NM_019083.2	NP_061956.2	TRMT13	19	1465	53	2	114	51	481	24
NM_020385.3	NP_065118.2	REXO4	252	1521	279	0	114	95	422	329
NM_020990.4	NP_066270.1	CKMT1B	589	1843	186	0	114	65	417	355
NM_020997.3	NP_066277.1	LEFTY1	80	1181	141	0	114	68	366	319
NM_021625.4	NP_067638.3	TRPV4	89	2705	61	1	114	78	871	48
NM_022488.4	NP_071933.2	ATG3	435	1380	7	1	114	97	314	1
NM_023012.5	NP_075388.2	RSRC2	160	1465	25	1	114	78	434	2
NM_024032.4	NP_076937.2	HROB, C17orf53	241	2185	49	1	114	85	647	20
NM_024586.5	NP_078862.4	OSBPL9	237	2448	12	0	114	94	736	732
NM_025015.2	NP_079291.2	HSPA12A	105	2133	208	1	114	72	675	13
NM_025082.3	NP_079358.3	CENPT	549	2235	190	1	114	64	561	26
NM_025228.3	NP_079504.2	TRAF3IP3	437	2093	55	1	114	93	551	20
NM_030640.2	NP_085143.1	DUSP16	763	2761	7	1	114	62	665	2
NM_031420.3	NP_113608.1	MRPL9	437	1241	100	1	114	81	267	64
NM_031902.4	NP_114108.1	MRPS5	236	1529	116	2	114	67	430	45
NM_032340.3	NP_115716.1	UQCC2	65	446	44	2	114	126	126	35
NM_032351.5	NP_115727.5	MRPL45	161	1082	168	0	114	35	306	250
NM_032376.3	NP_115752.1	TMEM101	77	851	30	0	114	32	257	247
NM_032584.2	NP_115973.2	ZNF347	107	2627	34	1	114	80	839	3
NM_032750.2	NP_116139.1	ABHD14B	888	1521	115	1	114	29	210	68
NM_032855.3	NP_116244.1	HSH2D	531	1590	66	0	114	101	352	330
NM_033082.3	NP_149073.1	SARNP	55	688	56	2	114	78	210	23
NM_033133.4	NP_149124.3	CNP	144	1410	60	0	114	88	421	401
NM_033624.2	NP_296373.1	FBXO21	39	1926	27	0	114	72	628	619
NM_053274.2	NP_444504.1	GLMN	115	1900	35	2	114	79	594	9
NM_080660.3	NP_542391.2	ZC3HAV1L	12	915	60	0	114	63	300	280
NM_080671.3	NP_542402.3	KCNE4	215	881	153	0	114	77	221	170
NM_080864.3	NP_543140.1	RLN3	57	486	12	0	114	42	142	138
NM_138411.2	NP_612420.1	FAM71E1	358	1054	106	1	114	114	231	6
NM_138477.3	NP_612486.2	CDAN1	26	3710	756	0	114	94	1227	975
NM_138820.3	NP_620175.1	HIGD2A	294	615	231	0	114	55	106	29
NM_144609.2	NP_653210.2	CCDC43	44	719	46	1	114	114	224	78
NM_144725.3	NP_653326.3	TTC23L	103	1189	37	1	114	100	361	47
NM_145045.4	NP_659482.3	CCDC151	143	1931	370	1	114	86	595	7
NM_145208.2	NP_660209.2	MBD3L1	86	671	44	2	114	80	194	33
NM_147193.2	NP_671726.2	GLIS1	567	2430	304	1	114	68	620	7
NM_152275.3	NP_689488.3	TTC30A	265	2263	70	1	114	67	665	27
NM_152517.2	NP_689730.2	TTC30B	33	2031	70	1	114	104	665	27
NM_152660.2	NP_689873.1	FAM76A	102	1026	83	2	114	84	307	15
NM_152730.5	NP_689943.4	TBC1D32	70	3844	30	0	114	81	1257	1247
NM_152766.4	NP_689979.1	TMEM256	54	396	100	1	114	71	113	22
NM_173662.2	NP_775933.1	RNF175	373	1360	98	2	114	69	328	140
NM_174899.4	NP_777559.3	FBXO36	23	590	107	2	114	46	188	8
NM_174912.3	NP_777572.2	FAAH2	149	1748	159	0	114	89	532	479
NM_176822.3	NP_789792.1	NLRP14	323	3605	111	0	114	75	1093	1056
NM_181642.2	NP_857593.1	SPINT1	204	1794	18	0	114	113	529	523
NM_181688.2	NP_859016.1	KRTAP10-10	62	818	15	0	114	85	251	246
NM_182920.1	NP_891550.1	ADAMTS9	32	5840	57	0	114	85	1935	1916
NM_194434.2	NP_919415.2	VAPA	299	1049	21	0	114	102	249	242
NM_197975.2	NP_932079.1	BTNL3	184	1585	150	0	114	74	466	416
NM_198467.2	NP_940869.2	RSBN1L	44	2585	238	1	114	116	846	110
NM_198693.3	NP_941966.1	KRTAP10-2	47	815	15	0	114	85	255	250
NM_198947.3	NP_945185.1	FAM111B	243	2448	9	0	114	45	734	731
NM_000062.2	NP_000053.2	SERPING1	191	1694	73	1	115	93	500	53
NM_000136.2	NP_000127.2	FANCC	262	1939	45	0	115	35	558	543
NM_000154.1	NP_000145.1	GALK1	63	1242	162	0	115	84	392	338
NM_000392.4	NP_000383.1	ABCC2	247	4885	119	2	115	87	1545	12
NM_000482.3	NP_000473.2	APOA4	104	1295	90	0	115	81	396	366
NM_000515.4	NP_000506.2	GH1	76	730	117	0	115	78	217	178
NM_000598.4	NP_000589.2	IGFBP3	132	1008	406	1	115	90	291	36
NM_000663.4	NP_000654.2	ABAT	938	2441	9	0	115	83	500	497
NM_000960.3	NP_000951.1	PTGIR	113	1274	66	0	115	92	386	364
NM_000965.4	NP_000956.2	RARB	469	1816	12	0	115	41	448	444
NM_000970.4	NP_000961.2	RPL6	55	922	64	1	115	34	288	5
NM_001002030.1	NP_001002030.1	ECHDC1	276	1182	88	1	115	52	301	7
NM_001002755.2	NP_001002755.1	NFU1	206	971	72	0	115	54	254	230
NM_001005353.2	NP_001005353.1	AK4	358	1030	156	0	115	117	223	171
NM_001007530.2	NP_001007531.1	CDRT15	29	596	46	1	115	88	188	25
NM_001010867.3	NP_001010867.1	IBA57	9	1080	226	1	115	84	356	24
NM_001010917.2	NP_001010917.1	GOLGA7B	66	570	85	1	115	94	167	27
NM_001012752.2	NP_001012770.1	ABI1	224	1655	15	0	115	83	476	471
NM_001017975.4	NP_001017975.4	HFM1	99	4407	13	1	115	64	1435	36
NM_001024601.2	NP_001019772.1	SPATA45	108	405	30	0	115	85	98	88
NM_001031712.2	NP_001026882.2	TRMT11	121	1513	39	0	115	114	463	450
NM_001047.3	NP_001038.1	SRD5A1	255	1035	267	0	115	105	259	170
NM_001080513.3	NP_001073982.3	CPN2	90	1728	69	0	115	84	545	522
NM_001080821.2	NP_001074290.1	ZNF799	204	2136	22	1	115	80	643	3
NM_001085429.1	NP_001078898.1	TMEM213	111	435	282	0	115	67	107	13
NM_001098479.1	NP_001091949.1	HLA-F	124	1453	195	0	115	88	442	377
NM_001099780.1	NP_001093250.1	PSMB11	59	962	13	1	115	94	300	112
NM_001100389.1	NP_001093859.1	TMEM192	99	915	18	0	115	88	271	265
NM_001109878.1	NP_001103348.1	TBX22	134	1697	279	0	115	73	520	427
NM_001129979.2	NP_001123451.1	SYCE1L	55	784	25	1	115	61	242	17
NM_001130716.1	NP_001124188.1	PLAC8	161	509	87	0	115	85	115	86
NM_001136201.1	NP_001129673.1	ISOC2	174	792	66	0	115	91	205	183
NM_001136499.1	NP_001129971.1	ZNF841	460	3235	34	1	115	80	924	3
NM_001144989.1	NP_001138461.1	ZNF814	272	2840	55	1	115	88	855	3
NM_001145873.1	NP_001139345.1	CD8A	1031	1739	366	0	115	130	235	113
NM_001163523.1	NP_001156995.1	ITPRIPL1	249	1893	33	0	115	96	547	536
NM_001170795.1	NP_001164266.1	ATRAID	18	708	101	2	115	94	229	18
NM_001190.3	NP_001181.2	BCAT2	56	1235	79	1	115	80	392	14
NM_001190790.1	NP_001177719.1	CDRT15L2	20	866	46	1	115	88	281	25
NM_001204818.1	NP_001191747.1	ZNF587B	235	1444	83	2	115	87	402	4
NM_001243783.1	NP_001230712.1	BBIP1	275	488	18	0	115	64	70	64
NM_001244705.1	NP_001231634.1	CSAD	268	1750	88	1	115	33	493	22
NM_001258316.1	NP_001245245.1	ECT2	518	3170	121	1	115	63	883	1
NM_001270891.1	NP_001257820.1	TRAPPC6A	25	505	39	0	115	90	159	146
NM_001277378.1	NP_001264307.1	C19orf67	168	1245	157	1	115	83	358	46
NM_001278438.1	NP_001265367.1	FNDC3A	348	3945	85	1	115	74	1198	18
NM_001284364.2	NP_001271293.2	ULK3	106	1519	270	0	115	93	470	380
NM_001290221.1	NP_001277150.1	NQO2	870	1566	28	1	115	42	231	12
NM_001306084.1	NP_001293013.1	CFAP54	39	9330	184	1	115	42	3096	21
NM_001316972.1	NP_001303901.1	SPACA6	183	1158	126	0	115	85	324	282
NM_001320141.1	NP_001307070.1	RPL6	344	1211	64	1	115	34	288	5
NM_001321635.1	NP_001308564.1	NIPAL2	256	1408	288	0	115	94	383	287
NM_001352.4	NP_001343.2	DBP	556	1534	223	1	115	44	325	42
NM_001375.2	NP_001366.1	DNASE2	146	1229	286	1	115	117	360	78
NM_001481.2	NP_001472.1	GAS8	122	1559	55	1	115	77	478	7
NM_001608.3	NP_001599.1	ACADL	228	1521	77	2	115	98	430	15
NM_001610.3	NP_001601.1	ACP2	58	1330	72	0	115	67	423	399
NM_001795.4	NP_001786.2	CDH5	171	2526	12	0	115	66	784	780
NM_002059.4	NP_002050.1	GH2	141	795	117	0	115	78	217	178
NM_002079.2	NP_002070.1	GOT1	208	1450	130	1	115	82	413	9
NM_002306.3	NP_002297.2	LGALS3	88	841	22	1	115	55	250	106
NM_002536.3	NP_002527.1	TBC1D25	179	2246	125	2	115	88	688	1
NM_003002.3	NP_002993.1	SDHD	84	564	125	2	115	86	159	25
NM_003347.3	NP_003338.1	UBE2L3	198	663	21	0	115	65	154	147
NM_003460.2	NP_003451.1	ZP2	483	2721	49	1	115	75	745	16
NM_003768.4	NP_003759.1	PEA15	206	599	231	0	115	84	130	53
NM_003795.5	NP_003786.1	SNX3	339	828	55	1	115	73	162	14
NM_003876.2	NP_003867.1	TMEM11	443	1022	97	1	115	30	192	28
NM_004027.2	NP_004018.1	INPP4A	393	3210	28	1	115	75	938	36
NM_004054.3	NP_004045.1	C3AR1	204	1653	50	2	115	77	482	2
NM_004135.3	NP_004126.1	IDH3G	197	1379	151	1	115	131	393	6
NM_004380.2	NP_004371.2	CREBBP	204	7533	73	1	115	69	2442	19
NM_004469.4	NP_004460.1	VEGFD, FIGF	467	1532	25	1	115	37	354	3
NM_004538.5	NP_004529.2	NAP1L3	379	1900	21	0	115	89	506	499
NM_004588.4	NP_004579.1	SCN2B	191	839	10	1	115	67	215	54
NM_005570.3	NP_005561.1	LMAN1	32	1565	214	1	115	79	510	10
NM_005815.4	NP_005806.2	ZNF443	198	2214	22	1	115	80	671	3
NM_005935.3	NP_005926.1	AFF1	407	4040	25	1	115	112	1210	58
NM_006055.2	NP_006046.1	LANCL1	164	1364	28	1	115	59	399	18
NM_006116.2	NP_006107.1	TAB1	49	1564	55	1	115	91	504	57
NM_006249.5	NP_006240.4	PRB3	38	968	58	1	115	68	309	11
NM_006331.7	NP_006322.4	EMG1	143	878	16	1	115	73	244	26
NM_006791.3	NP_006782.1	MORF4L1	237	1209	61	1	115	64	323	10
NM_006944.2	NP_008875.1	SPP2	85	721	12	0	115	92	211	207
NM_006947.3	NP_008878.3	SRP72	40	2056	61	1	115	124	671	24
NM_007263.3	NP_009194.2	COPE	42	969	211	1	115	45	308	37
NM_012097.3	NP_036229.1	ARL5A	319	859	23	2	115	68	179	17
NM_012131.2	NP_036263.1	CLDN17	36	711	51	0	115	63	224	207
NM_012228.3	NP_036360.3	MSRB2	111	660	258	0	115	105	182	96
NM_012333.4	NP_036465.2	MYCBP	73	385	103	1	115	33	103	13
NM_012437.5	NP_036569.1	SNAPIN	90	501	205	1	115	78	136	37
NM_013376.3	NP_037508.2	SERTAD1	159	870	240	0	115	111	236	156
NM_013389.2	NP_037521.2	NPC1L1	56	4136	106	1	115	63	1359	14
NM_014167.4	NP_054886.2	CCDC59	44	770	91	1	115	85	241	1
NM_014714.3	NP_055529.2	IFT140	362	4751	13	1	115	93	1462	4
NM_014742.3	NP_055557.2	TM9SF4	235	2164	12	0	115	77	642	638
NM_014866.1	NP_055681.1	SEC16A	309	7383	33	0	115	105	2357	2346
NM_014895.3	NP_055710.2	CEP162	115	4327	28	1	115	70	1403	7
NM_014974.2	NP_055789.1	DIP2C	90	4761	24	0	115	121	1556	1548
NM_015084.2	NP_055899.2	MRPS27	36	1281	27	0	115	80	414	405
NM_015192.3	NP_056007.1	PLCB1	387	4038	94	1	115	78	1216	11
NM_015260.3	NP_056075.1	SIN3B	34	3523	204	0	115	100	1162	1094
NM_015353.2	NP_056168.1	KCTD2	67	859	27	0	115	112	263	254
NM_015365.2	NP_056180.1	AMMECR1	81	1083	369	0	115	83	333	210
NM_015540.3	NP_056355.2	RPAP1	135	4317	124	1	115	67	1393	15
NM_015556.2	NP_056371.1	SIPA1L1	361	5776	94	1	115	80	1804	14
NM_015603.2	NP_056418.1	CCDC9	207	1803	40	1	115	94	531	153
NM_015622.5	NP_056437.4	CCZ1	90	1539	151	1	115	90	482	2
NM_015846.3	NP_056671.2	MBD1	437	2255	340	1	115	82	605	70
NM_015934.4	NP_057018.1	NOP58	226	1816	52	1	115	74	529	23
NM_016131.4	NP_057215.3	RAB10	749	1352	91	1	115	47	200	11
NM_016132.4	NP_057216.2	MYEF2	124	1927	148	1	115	120	600	17
NM_016406.3	NP_057490.2	UFC1	254	758	7	1	115	48	167	13
NM_016500.3	NP_057584.2	PBDC1	203	905	22	1	115	70	233	33
NM_016542.3	NP_057626.2	STK26	301	1552	36	0	115	78	416	404
NM_017443.4	NP_059139.3	POLE3	248	692	34	1	115	68	147	2
NM_017613.3	NP_060083.1	DONSON	67	1768	343	1	115	97	566	62
NM_017623.4	NP_060093.3	CNNM3	24	2148	121	1	115	89	707	115
NM_017720.2	NP_060190.2	STAP2	97	1447	64	1	115	81	449	4
NM_017814.2	NP_060284.1	TMEM161A	73	1513	51	0	115	99	479	462
NM_017827.3	NP_060297.1	SARS2	160	1717	12	0	115	111	518	514
NM_017950.3	NP_060420.2	CCDC40	31	3460	43	1	115	78	1142	151
NM_018066.3	NP_060536.3	GPN2	282	1215	84	0	115	76	310	282
NM_018087.4	NP_060557.3	NDC1	291	2316	205	1	115	77	674	1
NM_018109.3	NP_060579.3	MTPAP	63	1812	195	0	115	97	582	517
NM_018428.2	NP_060898.2	UTP6	83	1877	79	1	115	88	597	13
NM_018467.3	NP_060937.1	USE1	60	840	57	0	115	117	259	240
NM_018475.4	NP_060945.2	TMEM165	277	1252	106	1	115	97	324	80
NM_020156.4	NP_064541.1	C1GALT1	223	1315	65	2	115	33	363	5
NM_020232.4	NP_064617.2	PSMG2	120	915	54	0	115	71	264	246
NM_020547.3	NP_065434.1	AMHR2	80	1802	225	0	115	107	573	498
NM_020839.3	NP_065890.1	WDR48	40	2074	55	1	115	66	677	23
NM_020850.2	NP_065901.1	RANBP10	116	1979	238	1	115	127	620	27
NM_020991.3	NP_066271.1	CSH2	115	769	117	0	115	80	217	178
NM_021181.4	NP_067004.3	SLAMF7	245	1253	17	2	115	78	335	42
NM_021807.3	NP_068579.3	EXOC4	35	2960	106	1	115	79	974	25
NM_022078.2	NP_071361.2	GPATCH3	29	1607	253	1	115	79	525	23
NM_022579.2	NP_072101.1	CSHL1	132	801	117	0	115	83	222	183
NM_022765.3	NP_073602.3	MICAL1	312	3516	31	1	115	41	1067	16
NM_024083.3	NP_076988.1	ASPSCR1	97	1759	148	1	115	96	553	2
NM_024410.3	NP_077721.2	ODF1	108	861	77	2	115	90	250	5
NM_024491.3	NP_077817.2	CEP70	294	2088	54	0	115	94	597	579
NM_024709.4	NP_078985.3	C1orf115	117	546	310	1	115	78	142	29
NM_024836.2	NP_079112.1	ZNF672	848	2207	53	2	115	59	452	14
NM_024855.3	NP_079131.3	ACTR5	25	1849	276	0	115	32	607	515
NM_024930.2	NP_079206.2	ELOVL7	200	1046	40	1	115	44	281	27
NM_031427.3	NP_113615.2	DNAL1	165	738	38	2	115	103	190	10
NM_032027.2	NP_114416.1	TM2D1	303	927	190	1	115	81	207	24
NM_032364.5	NP_115740.5	DNAJC14	204	2313	34	1	115	31	702	13
NM_032740.3	NP_116129.3	SFT2D3	506	1154	447	0	115	103	215	66
NM_032819.4	NP_116208.3	ZNF341	262	2806	33	0	115	80	847	836
NM_032982.3	NP_116764.2	CASP2	241	1600	51	0	115	102	452	435
NM_033285.3	NP_150601.1	TP53INP1	384	1107	21	0	115	97	240	233
NM_033318.4	NP_201575.3	SMDT1	78	402	82	1	115	95	107	33
NM_033386.3	NP_203744.1	MICALL1	275	2867	172	1	115	79	863	30
NM_033423.4	NP_219491.1	GZMH	107	848	73	1	115	79	246	28
NM_033549.4	NP_291027.3	TRIM41	737	2630	15	0	115	97	630	625
NM_053017.4	NP_443750.2	ART5	454	1330	18	0	115	46	291	285
NM_080476.4	NP_536724.1	PIGU	200	1508	190	1	115	34	435	4
NM_080667.6	NP_542398.3	CFAP36	207	1236	107	2	115	84	342	1
NM_133259.3	NP_573566.2	LRPPRC	58	4243	103	1	115	41	1394	18
NM_138353.3	NP_612362.2	DCAF15	39	1842	208	1	115	33	600	70
NM_138460.2	NP_612469.1	CMTM5	444	915	177	0	115	109	156	97
NM_138570.3	NP_612637.1	SLC38A10	418	2761	78	0	115	85	780	754
NM_138792.3	NP_620147.1	LEO1	56	2057	9	0	115	76	666	663
NM_138795.3	NP_620150.1	ARL8A	171	732	60	0	115	83	186	166
NM_144679.2	NP_653280.1	TEPSIN, ENTHD2	58	1636	76	1	115	70	525	32
NM_144972.4	NP_659409.2	LDHAL6A	854	1853	136	1	115	87	332	12
NM_148961.3	NP_683764.1	OTOS	155	425	12	0	115	39	89	85
NM_152319.3	NP_689532.1	C12orf54	131	515	42	0	115	91	127	113
NM_152416.3	NP_689629.2	NDUFAF6	23	1025	96	0	115	58	333	301
NM_152559.2	NP_689772.2	METTL27, WBSCR27	40	778	58	1	115	90	245	50
NM_152610.2	NP_689823.2	CCDC185	103	1975	259	1	115	85	623	70
NM_152731.2	NP_689944.2	BEND6	586	1426	22	1	115	83	279	54
NM_152739.3	NP_689952.1	HOXA9	73	892	67	1	115	59	272	2
NM_152756.4	NP_689969.2	RICTOR	31	5158	55	1	115	96	1708	11
NM_152852.2	NP_690591.1	MS4A6A	493	1240	22	1	115	87	248	4
NM_153698.1	NP_714542.1	PRXL2C, AAED1	36	717	268	1	115	86	226	4
NM_173567.4	NP_775838.3	EPHX4	104	1193	33	0	115	65	362	351
NM_173631.3	NP_775902.2	ZNF547	281	1490	9	0	115	95	402	399
NM_173794.3	NP_776155.1	FUNDC1	143	611	31	1	115	79	155	12
NM_174945.2	NP_777605.1	ZNF575	528	1266	275	2	115	68	245	175
NM_178176.3	NP_835470.1	MOGAT3	167	1193	85	1	115	86	341	51
NM_178452.5	NP_848547.4	DNAAF1	181	2359	130	1	115	47	725	44
NM_181291.2	NP_851808.1	WDR20	72	1818	27	0	115	87	581	572
NM_181361.2	NP_852006.1	KCNMB2	481	1189	8	2	115	44	235	10
NM_182539.3	NP_872345.2	TCTE1	156	1662	180	0	115	47	501	441
NM_182972.2	NP_892017.2	IRF2BP2	31	1795	69	0	115	51	587	564
NM_198097.3	NP_932765.1	CCZ1B	98	1547	151	1	115	90	482	2
NM_000106.5	NP_000097.3	CYP2D6	90	1584	66	0	116	95	497	475
NM_000234.2	NP_000225.1	LIG1	420	3180	15	0	116	90	919	914
NM_000921.4	NP_000912.3	PDE3A	40	3466	435	0	116	64	1141	996
NM_001001317.4	NP_001001317.1	PRSS58	109	835	223	1	116	71	241	6
NM_001001788.3	NP_001001788.2	RAET1G	142	1147	103	1	116	100	334	46
NM_001001976.2	NP_001001976.1	ATE1	114	1671	103	1	116	120	518	7
NM_001003713.2	NP_001003713.1	ATP5MF, ATP5J2	60	327	75	0	116	59	88	63
NM_001004127.2	NP_001004127.2	ALG11	32	1511	80	2	116	26	492	28
NM_001017920.2	NP_001017920.2	DAPL1	56	380	7	1	116	69	107	17
NM_001031836.2	NP_001027006.2	KCNU1	87	3537	22	1	116	88	1149	25
NM_001039661.1	NP_001034750.1	TIRAP	436	1102	60	0	116	107	221	201
NM_001039771.2	NP_001034860.1	CBLN3	471	1089	244	1	116	86	205	21
NM_001041.3	NP_001032.2	SI	63	5547	115	1	116	39	1827	14
NM_001044369.2	NP_001037834.2	DIPK1C, FAM69C	9	1269	423	0	116	76	419	278
NM_001077195.1	NP_001070663.1	ZNF436	559	1972	18	0	116	101	470	464
NM_001077351.1	NP_001070819.1	RBM23	199	1519	10	1	116	76	439	4
NM_001077619.1	NP_001071087.1	UBXN2B	122	1118	103	1	116	19	331	4
NM_001080463.1	NP_001073932.1	DYNC2H1	144	13089	69	0	116	54	4314	4291
NM_001080501.2	NP_001073970.1	TMEM223	20	629	20	2	116	117	202	30
NM_001083112.2	NP_001076581.2	GPD2	360	2544	102	0	116	77	727	693
NM_001098.2	NP_001089.1	ACO2	22	2365	61	1	116	89	780	13
NM_001098616.2	NP_001092086.1	C1orf43	390	1152	34	1	116	56	253	4
NM_001100876.1	NP_001094346.1	PHYHD1	933	1809	43	1	116	76	291	24
NM_001126328.2	NP_001119800.1	LNX1	285	2472	106	1	116	27	728	67
NM_001135629.2	NP_001129101.1	PPP1R21	185	2528	97	1	116	32	780	8
NM_001135686.2	NP_001129158.2	TARM1	25	841	67	1	116	98	271	22
NM_001141936.2	NP_001135408.2	C4orf48	151	439	30	0	116	81	95	85
NM_001174097.2	NP_001167568.1	LDHB	333	1338	99	0	116	122	334	301
NM_001198879.1	NP_001185808.1	ATP5MF-PTCD1, ATP5J2-PTCD1	60	2310	75	0	116	59	749	724
NM_001204883.1	NP_001191812.1	RAB43	49	688	168	0	116	101	212	156
NM_001257180.1	NP_001244109.1	SLC20A2	694	2653	6	0	116	77	652	650
NM_001276351.1	NP_001263280.1	C1orf141	145	1348	28	1	116	47	400	8
NM_001301229.1	NP_001288158.1	HMGB3	103	706	36	0	116	79	200	188
NM_001304944.1	NP_001291873.1	DNAJC22	1204	2230	25	1	116	54	341	27
NM_001316979.1	NP_001303908.1	ZBTB45	268	1804	70	1	116	103	511	11
NM_001321018.1	NP_001307947.1	UBA52	742	1129	73	1	116	94	128	18
NM_001325.2	NP_001316.1	CSTF2	58	1792	73	1	116	67	577	7
NM_001514.5	NP_001505.1	GTF2B	119	1070	22	1	116	30	316	15
NM_001665.3	NP_001656.2	RHOG	158	734	31	1	116	89	191	40
NM_001752.3	NP_001743.1	CAT	89	1673	33	0	116	102	527	516
NM_001938.2	NP_001929.1	DR1	725	1256	22	1	116	106	176	13
NM_002022.2	NP_002013.1	FMO4	381	2058	56	2	116	61	558	4
NM_002107.4	NP_002098.1	H3-3A, H3F3A	128	539	340	1	116	63	136	4
NM_002162.4	NP_002153.2	ICAM3	220	1864	9	0	116	73	547	544
NM_002164.5	NP_002155.1	IDO1	114	1326	12	0	116	69	403	399
NM_002169.2	NP_002160.1	IFNA5	57	627	24	0	116	95	189	181
NM_002358.3	NP_002349.1	MAD2L1	124	742	199	1	116	80	205	5
NM_002513.2	NP_002504.2	NME3	175	685	252	0	116	71	169	85
NM_002668.2	NP_002659.1	PLP2	164	623	101	2	116	68	152	21
NM_002700.2	NP_002691.1	POU4F3	89	1106	3	0	116	118	338	337
NM_002797.4	NP_002788.1	PSMB5	264	1056	109	1	116	78	263	2
NM_003135.2	NP_003126.1	SRP19	189	624	151	1	116	117	144	53
NM_003140.2	NP_003131.1	SRY	138	753	10	1	116	36	204	5
NM_003141.3	NP_003132.2	TRIM21	113	1541	24	0	116	104	475	467
NM_003268.5	NP_003259.2	TLR5	641	3218	39	0	116	110	858	845
NM_003295.3	NP_003286.1	TPT1	215	734	31	1	116	83	172	55
NM_003758.3	NP_003749.2	EIF3J	127	904	157	1	116	90	258	12
NM_003800.4	NP_003791.3	RNGTT	220	2014	87	0	116	100	597	568
NM_003841.4	NP_003832.2	TNFRSF10C	308	1088	241	1	116	100	259	22
NM_003863.3	NP_003854.1	DPM2	664	919	112	1	116	83	84	34
NM_003909.4	NP_003900.1	CPNE3	163	1777	34	1	116	50	537	11
NM_004179.2	NP_004170.1	TPH1	26	1361	76	1	116	76	444	6
NM_004280.4	NP_004271.1	EEF1E1	74	599	109	1	116	76	174	4
NM_004317.3	NP_004308.2	GET3, ASNA1	47	1094	49	1	116	109	348	20
NM_004482.3	NP_004473.2	GALNT3	387	2289	108	0	116	57	633	597
NM_004523.3	NP_004514.2	KIF11	308	3479	71	2	116	101	1056	4
NM_004939.2	NP_004930.1	DDX1	313	2536	18	0	116	93	740	734
NM_005001.4	NP_004992.2	NDUFA7	55	397	52	1	116	95	113	69
NM_005004.3	NP_004995.1	NDUFB8	72	633	63	0	116	74	186	165
NM_005070.3	NP_005061.2	SLC4A3	269	3968	106	1	116	101	1232	8
NM_005402.3	NP_005393.2	RALA	310	931	54	0	116	90	206	188
NM_005444.2	NP_005435.1	CNOT9	375	1275	79	1	116	85	299	15
NM_005466.3	NP_005457.2	MED6	53	794	121	1	116	40	246	14
NM_005629.3	NP_005620.1	SLC6A8	278	2186	174	0	116	70	635	577
NM_005740.2	NP_005731.1	DNAL4	228	546	25	1	116	83	105	47
NM_005759.5	NP_005750.4	ABI2	276	1704	15	0	116	68	475	470
NM_005966.3	NP_005957.2	NAB1	572	2036	82	1	116	41	487	44
NM_005995.4	NP_005986.2	TBX10	88	1246	210	0	116	86	385	315
NM_006085.5	NP_006076.4	BPNT1	176	1103	24	0	116	43	308	300
NM_006241.7	NP_006232.1	PPP1R2	376	994	72	0	116	49	205	181
NM_006358.3	NP_006349.1	SLC25A17	151	1075	69	0	116	97	307	284
NM_006413.4	NP_006404.1	RPP30	35	842	262	1	116	104	268	2
NM_006466.3	NP_006457.2	POLR3F	118	1069	74	2	116	86	316	15
NM_006585.3	NP_006576.2	CCT8	207	1854	39	0	116	84	548	535
NM_006588.3	NP_006579.2	SULT1C4	427	1336	15	0	116	70	302	297
NM_007014.4	NP_008945.2	WWP2	176	2789	139	1	116	31	870	26
NM_007238.4	NP_009169.3	PXMP4	123	762	115	1	116	40	212	12
NM_007244.2	NP_009175.2	PRR4	39	444	61	1	116	84	134	2
NM_012193.3	NP_036325.2	FZD4	313	1927	153	0	116	86	537	486
NM_012444.2	NP_036576.1	SPO11	93	1284	15	0	116	94	396	391
NM_012466.3	NP_036598.1	TSPAN16	159	897	55	1	116	118	245	10
NM_013252.2	NP_037384.1	CLEC5A	197	764	12	0	116	59	188	184
NM_013260.7	NP_037392.1	SAP30BP	257	1184	16	1	116	108	308	48
NM_013358.2	NP_037490.2	PADI1	92	2084	36	0	116	83	663	651
NM_013378.2	NP_037510.1	VPREB3	80	452	30	0	116	83	123	113
NM_013393.1	NP_037525.1	MRM2	29	770	445	1	116	80	246	1
NM_014248.3	NP_055063.1	RBX1	52	379	12	0	116	75	108	104
NM_014280.2	NP_055095.2	DNAJC8	33	795	60	0	116	73	253	233
NM_014377.1	NP_055192.1	DNAJC2	251	2117	98	2	116	85	621	2
NM_014454.2	NP_055269.1	SESN1	432	2088	16	1	116	85	551	2
NM_014481.3	NP_055296.2	APEX2	100	1657	28	1	116	113	518	41
NM_014517.4	NP_055332.3	UBP1	530	2153	18	0	116	87	540	534
NM_014653.3	NP_055468.2	WSCD2	1007	2705	207	0	116	92	565	496
NM_014781.4	NP_055596.3	RB1CC1	558	5343	10	1	116	43	1594	10
NM_014820.4	NP_055635.3	TOMM70	449	2276	113	2	116	94	608	61
NM_014913.3	NP_055728.1	ADNP2	455	3851	155	2	116	110	1131	2
NM_015021.2	NP_055836.1	ZNF292	43	8215	181	1	116	93	2723	38
NM_015151.3	NP_055966.2	DIP2A	183	4899	112	1	116	72	1571	18
NM_015397.3	NP_056212.1	DCAF12	342	1704	175	1	116	85	453	20
NM_015416.4	NP_056231.3	LETMD1	58	1141	154	1	116	79	360	1
NM_015497.4	NP_056312.2	TMEM87A	186	1854	122	2	116	120	555	12
NM_015715.4	NP_056530.2	PLA2G3	253	1783	27	0	116	74	509	500
NM_015898.3	NP_056982.1	ZBTB7A	279	2034	264	0	116	75	584	496
NM_016013.3	NP_057097.2	NDUFAF1	398	1382	235	1	116	88	327	18
NM_016622.3	NP_057706.2	MRPL35	58	625	100	1	116	78	188	33
NM_017548.4	NP_060018.1	CDV3	455	1232	247	1	116	108	258	22
NM_017781.2	NP_060251.2	CYP2W1	13	1486	168	0	116	74	490	434
NM_018184.2	NP_060654.1	ARL8B	221	782	60	0	116	79	186	166
NM_018320.4	NP_060790.2	RNF121	340	1324	58	1	116	49	327	63
NM_018447.3	NP_060917.1	EMC3	467	1253	84	0	116	91	261	233
NM_019110.4	NP_061983.2	ZKSCAN4	316	1954	239	2	116	109	545	4
NM_020312.3	NP_064708.1	COQ9	81	1038	62	2	116	69	318	27
NM_020408.5	NP_065141.3	LYRM4	217	493	45	0	116	78	91	76
NM_021005.3	NP_066285.1	NR2F2	1224	2469	6	0	116	89	414	412
NM_021009.6	NP_066289.3	UBC	458	2516	73	1	116	99	685	18
NM_021078.2	NP_066564.2	KAT2A	60	2574	343	1	116	71	837	28
NM_021102.3	NP_066925.1	SPINT2	435	1194	137	2	116	63	252	6
NM_022355.3	NP_071750.1	DPEP2	189	1650	159	0	116	81	486	433
NM_022749.5	NP_073586.5	FAM160B2	51	2283	124	1	116	97	743	14
NM_022774.2	NP_073611.1	EXO5	247	1369	97	1	116	81	373	7
NM_024411.4	NP_077722.1	PDYN	454	1219	39	0	116	94	254	241
NM_024419.4	NP_077733.3	PGS1	48	1719	149	2	116	95	556	47
NM_025144.3	NP_079420.3	ALPK1	279	4014	79	1	116	83	1244	20
NM_030937.5	NP_112199.2	CCNL2	36	1599	192	0	116	68	520	456
NM_030945.3	NP_112207.1	C1QTNF3	141	882	70	1	116	100	246	127
NM_031885.3	NP_114091.3	BBS2	234	2400	51	0	116	60	721	704
NM_032175.3	NP_115551.2	UTP15	255	1812	160	1	116	96	518	19
NM_032368.4	NP_115744.2	LZIC	346	919	69	0	116	94	190	167
NM_032601.3	NP_115990.3	MCEE	45	576	31	1	116	56	176	2
NM_033394.2	NP_203752.2	TANC1	274	5860	183	0	116	94	1861	1800
NM_033416.2	NP_219484.1	IMP4	708	1584	178	1	116	38	291	7
NM_033429.2	NP_219501.2	CALML4	734	1325	129	0	116	125	196	153
NM_052844.3	NP_443076.2	DYNC2I2, WDR34	124	1735	244	1	116	88	536	41
NM_052942.3	NP_443174.1	GBP5	537	2298	18	0	116	89	586	580
NM_053036.2	NP_444264.1	NPFFR2	289	1552	4	1	116	50	420	33
NM_130900.2	NP_570970.2	RAET1L	61	802	103	1	116	100	246	46
NM_133466.3	NP_597723.1	ZFP82	261	1860	18	0	116	101	532	526
NM_133638.4	NP_598377.4	ADAMTS19	127	3769	18	0	116	82	1213	1207
NM_138378.2	NP_612387.1	FDXACB1	325	2200	178	1	116	93	624	37
NM_139170.2	NP_631909.2	C16orf71	462	2025	21	0	116	105	520	513
NM_144643.3	NP_653244.2	SCLT1	504	2571	46	1	116	77	688	33
NM_144723.2	NP_653324.1	ZMAT2	101	701	55	1	116	95	199	70
NM_152457.2	NP_689670.1	ZNF597	231	1506	9	0	116	59	424	421
NM_152598.3	NP_689811.2	MARCHF10, MARCH10	322	2749	7	1	116	36	808	30
NM_152647.2	NP_689860.2	FAM227B	294	1821	17	2	116	95	508	20
NM_152721.5	NP_689934.2	DOK6	197	1193	77	2	116	94	331	9
NM_152750.4	NP_689963.2	CDHR3	108	2766	39	0	116	79	885	872
NM_152754.2	NP_689967.2	SEMA3D	40	2374	4	1	116	41	777	20
NM_152905.3	NP_690869.1	NEDD1	339	2322	34	1	116	91	660	10
NM_153269.2	NP_695001.2	C20orf96	168	1260	7	1	116	53	363	13
NM_153330.4	NP_699161.1	DNAJB8	1661	2360	157	1	116	56	232	77
NM_173801.4	NP_776162.2	OOSP2	185	662	18	0	116	57	158	152
NM_173829.3	NP_776190.1	SREK1IP1	152	620	50	2	116	80	155	9
NM_174923.2	NP_777583.2	CCDC107	90	942	265	1	116	92	283	24
NM_175066.3	NP_778236.2	DDX51	39	2040	37	1	116	71	666	63
NM_181336.3	NP_851853.1	LEMD2	13	1525	85	1	116	82	503	86
NM_183323.2	NP_899152.1	PAIP1	151	1255	36	0	116	76	367	355
NM_194296.1	NP_919272.1	SPATA24	27	645	117	0	116	77	205	166
NM_197956.3	NP_931045.1	NAIF1	219	1203	27	0	116	99	327	318
NM_198076.5	NP_932342.1	COX20	386	743	67	1	116	59	118	16
NM_198318.4	NP_938074.2	PRMT1	129	1191	30	0	116	93	353	343
NM_201403.2	NP_958805.1	MOB3C	231	882	231	0	116	112	216	139
NM_207009.3	NP_996892.1	DENND10, FAM45A	78	1152	33	0	116	47	357	346
NM_213653.3	NP_998818.1	HJV, HFE2	325	1606	40	1	116	100	426	6
NM_000201.2	NP_000192.2	ICAM1	319	1918	76	1	117	73	532	20
NM_000230.2	NP_000221.1	LEP	57	561	52	1	117	65	167	52
NM_000481.3	NP_000472.2	AMT	228	1440	115	1	117	74	403	56
NM_000755.4	NP_000746.2	CRAT	289	2170	63	0	117	60	626	605
NM_000878.4	NP_000869.1	IL2RB	199	1855	85	1	117	70	551	50
NM_000919.3	NP_000910.2	PAM	373	3298	118	1	117	83	974	9
NM_001004304.3	NP_001004304.1	ZNF740	394	976	75	0	117	101	193	168
NM_001005464.2	NP_001005464.1	H3C15, HIST2H3A	36	447	270	0	117	104	136	46
NM_001008777.2	NP_001008777.2	FBXO47	200	1559	195	0	117	100	452	387
NM_001012970.2	NP_001012988.1	C1orf100	113	557	269	2	117	82	147	2
NM_001014764.2	NP_001014764.1	EMC6	339	672	315	0	117	60	110	5
NM_001017405.2	NP_001017405.1	MAEA	63	1254	33	0	117	69	396	385
NM_001024210.1	NP_001019381.1	S100A13	504	801	154	1	117	81	98	8
NM_001031715.2	NP_001026885.1	IQCH	97	3181	55	1	117	68	1027	6
NM_001037633.1	NP_001032722.1	SIL1	206	1592	30	0	117	129	461	451
NM_001039111.2	NP_001034200.1	TRIM71	63	2670	51	0	117	90	868	851
NM_001040107.1	NP_001035196.1	HVCN1	190	1012	60	0	117	81	273	253
NM_001042603.2	NP_001036068.1	KDM5A	364	5437	232	1	117	61	1690	5
NM_001043229.1	NP_001036694.1	CSKMT, METTL12	259	982	18	0	117	45	240	234
NM_001099737.2	NP_001093207.1	WDR83	345	1293	100	1	117	58	315	7
NM_001105198.1	NP_001098668.1	TMEM177	473	1409	128	2	117	111	311	75
NM_001105573.1	NP_001099043.1	FBXO45	131	992	217	1	117	88	286	97
NM_001114132.1	NP_001107604.1	NBEAL1	333	8418	33	0	117	24	2694	2683
NM_001130929.1	NP_001124401.1	STMP1, C7orf73	107	251	45	0	117	98	47	32
NM_001143853.1	NP_001137325.1	PYM1	16	628	13	1	117	77	203	26
NM_001159546.1	NP_001153018.1	RFPL2	277	1144	63	0	117	73	288	267
NM_001165032.1	NP_001158504.1	RNF182	606	1350	46	1	117	63	247	13
NM_001198671.1	NP_001185600.1	TLCD5, TMEM136	241	979	94	1	117	96	245	16
NM_001201.3	NP_001192.3	BMP3	320	1739	177	0	117	77	472	413
NM_001204871.1	NP_001191800.1	URGCP-MRPS24	57	390	92	2	117	81	110	7
NM_001270482.1	NP_001257411.1	PSMD11	61	1330	115	1	117	82	422	31
NM_001282478.1	NP_001269407.1	PRR23D2	177	1017	4	1	117	32	279	5
NM_001282479.1	NP_001269408.1	PRR23D1	178	1018	4	1	117	32	279	5
NM_001282735.1	NP_001269664.1	SPATS2L	484	2161	19	1	117	94	558	1
NM_001290342.2	NP_001277271.1	CERS3	517	1669	20	2	117	70	383	18
NM_001292003.1	NP_001278932.1	KLHL8	385	2248	15	0	117	52	620	615
NM_001301228.1	NP_001288157.1	HMGB3	212	815	36	0	117	79	200	188
NM_001314021.1	NP_001300950.1	URB2	185	4760	265	1	117	89	1524	10
NM_001318329.1	NP_001305258.1	LOC284898	162	492	37	1	117	69	109	1
NM_001320137.1	NP_001307066.1	RPL6	236	1103	64	1	117	34	288	5
NM_001321378.1	NP_001308307.1	PIK3C2A	283	5344	35	2	117	76	1686	33
NM_001323552.1	NP_001310481.1	TRADD	93	1032	16	1	117	93	312	56
NM_001385.2	NP_001376.1	DPYS	129	1689	49	1	117	99	519	80
NM_001483.2	NP_001474.1	NIPSNAP2, GBAS	33	894	95	2	117	72	286	22
NM_001866.2	NP_001857.1	COX7B	90	333	60	0	117	101	80	60
NM_001918.3	NP_001909.3	DBT	33	1482	15	0	117	54	482	477
NM_001943.4	NP_001934.2	DSG2	248	3605	97	1	117	88	1118	11
NM_002099.7	NP_002090.4	GYPA	151	604	4	1	117	46	150	3
NM_002100.5	NP_002091.3	GYPB	58	334	4	1	117	46	91	3
NM_002106.3	NP_002097.1	H2AZ1, H2AFZ	185	572	130	1	117	81	128	33
NM_002254.6	NP_002245.4	KIF3C	657	3039	102	0	117	79	793	759
NM_002495.3	NP_002486.1	NDUFS4	30	558	15	0	117	86	175	170
NM_002504.5	NP_002495.2	NFX1	156	3519	46	1	117	79	1120	14
NM_002517.3	NP_002508.2	NPAS1	196	1969	44	2	117	74	590	281
NM_002566.4	NP_002557.2	P2RY11	201	1326	136	1	117	114	374	34
NM_002697.3	NP_002688.3	POU2F1	69	2370	28	1	117	81	766	14
NM_002748.3	NP_002739.1	MAPK6	794	2960	24	0	117	63	721	713
NM_002857.3	NP_002848.1	PEX19	27	927	79	1	117	52	299	64
NM_002872.4	NP_002863.1	RAC2	151	730	31	1	117	96	192	33
NM_002912.4	NP_002903.3	REV3L	458	9851	36	0	117	91	3130	3118
NM_003172.3	NP_003163.1	SURF1	32	935	128	2	117	79	300	15
NM_003225.2	NP_003216.1	TFF1	40	295	9	0	117	72	84	81
NM_003251.3	NP_003242.1	THRSP	21	462	48	0	117	80	146	130
NM_003315.3	NP_003306.3	DNAJC7	281	1766	22	1	117	90	494	2
NM_003358.2	NP_003349.1	UGCG	450	1635	30	0	117	132	394	384
NM_003850.2	NP_003841.1	SUCLA2	57	1449	12	0	117	83	463	459
NM_003898.3	NP_003889.1	SYNJ2	106	4597	160	1	117	135	1496	13
NM_003900.4	NP_003891.1	SQSTM1	95	1418	205	1	117	80	440	14
NM_003913.4	NP_003904.3	PRPF4B	91	3115	42	0	117	76	1007	993
NM_004302.4	NP_004293.1	ACVR1B	77	1595	145	1	117	97	505	36
NM_004645.2	NP_004636.1	COIL	31	1762	101	2	117	67	576	8
NM_004707.3	NP_004698.3	ATG12	299	722	70	1	117	63	140	35
NM_004770.2	NP_004761.2	KCNB2	588	3324	95	2	117	98	911	5
NM_004870.3	NP_004861.2	MPDU1	216	960	62	2	117	107	247	42
NM_004964.2	NP_004955.2	HDAC1	63	1512	52	1	117	106	482	12
NM_005598.3	NP_005589.1	NHLH1	442	844	3	0	117	116	133	132
NM_005653.4	NP_005644.2	TFCP2	721	2230	67	1	117	32	502	17
NM_005656.3	NP_005647.3	TMPRSS2	134	1613	43	1	117	92	492	42
NM_006072.4	NP_006063.1	CCL26	108	393	3	0	117	112	94	93
NM_006112.3	NP_006103.1	PPIE	56	962	67	1	117	49	301	44
NM_006147.3	NP_006138.1	IRF6	304	1708	124	1	117	72	467	20
NM_006280.2	NP_006271.1	SSR4	124	646	9	0	117	111	173	170
NM_006283.2	NP_006274.2	TACC1	379	2797	47	2	117	75	805	41
NM_006301.3	NP_006292.3	MAP3K12	271	2851	13	1	117	76	859	16
NM_006302.2	NP_006293.2	MOGS	163	2677	168	0	117	92	837	781
NM_006460.2	NP_006451.1	HEXIM1	1874	2954	277	1	117	98	359	77
NM_006529.3	NP_006520.2	GLRA3	504	1899	120	0	117	89	464	424
NM_006604.2	NP_006595.1	RFPL3	18	885	63	0	117	73	288	267
NM_006809.4	NP_006800.2	TOMM34	140	1070	49	1	117	85	309	45
NM_006810.3	NP_006801.1	PDIA5	156	1716	56	2	117	117	519	11
NM_006834.4	NP_006825.1	RAB32	180	858	270	0	117	92	225	135
NM_006979.2	NP_008910.2	SLC39A7	420	1830	91	1	117	96	469	113
NM_007043.6	NP_008974.5	KRR1	41	1187	85	1	117	104	381	43
NM_007045.3	NP_008976.1	CEP43, FGFR1OP	96	1296	175	1	117	38	399	3
NM_007247.5	NP_009178.3	SYNRG	83	4028	81	0	117	69	1314	1287
NM_007272.2	NP_009203.2	CTRC	23	830	103	1	117	79	268	28
NM_007322.2	NP_015561.1	RANBP3	227	1931	148	1	117	104	567	13
NM_012328.2	NP_036460.1	DNAJB9	369	1041	45	0	117	42	223	208
NM_013249.2	NP_037381.2	ZNF214	303	2124	19	1	117	88	606	1
NM_014251.2	NP_055066.1	SLC25A13	191	2219	70	1	117	113	675	21
NM_014262.4	NP_055077.2	P3H3	68	2279	555	0	117	75	736	551
NM_014342.3	NP_055157.1	MTCH2	189	1101	63	0	117	80	303	282
NM_014347.2	NP_055162.1	ZNF324	145	1807	13	1	117	89	553	24
NM_014471.2	NP_055286.1	SPINK4	45	306	99	0	117	78	86	53
NM_014700.3	NP_055515.1	RAB11FIP3	339	2610	166	1	117	52	756	183
NM_014740.3	NP_055555.1	EIF4A3	222	1458	18	0	117	98	411	405
NM_014846.3	NP_055661.3	WASHC5, KIAA0196	329	3809	67	1	117	69	1159	7
NM_014862.3	NP_055677.3	ARNT2	166	2320	33	0	117	121	717	706
NM_014924.4	NP_055739.2	ATG14	36	1515	94	1	117	85	492	21
NM_014999.3	NP_055814.1	RAB21	267	945	215	2	117	79	225	27
NM_015000.3	NP_055815.1	STK38L	199	1594	6	0	117	101	464	462
NM_015110.3	NP_055925.2	SMC5	117	3423	171	0	117	73	1101	1044
NM_015388.3	NP_056203.2	YIPF3	183	1236	37	1	117	73	350	20
NM_015462.4	NP_056277.2	NOL11	115	2275	197	2	117	88	719	17
NM_015562.1	NP_056377.1	UBXN7	75	1545	99	0	117	52	489	456
NM_015698.5	NP_056513.2	GPKOW	79	1510	226	1	117	129	476	29
NM_016016.3	NP_057100.1	SLC25A39	175	1231	42	0	117	62	351	337
NM_016020.3	NP_057104.2	TFB1M	55	1096	166	1	117	85	346	49
NM_016056.3	NP_057140.2	TMBIM4	121	838	55	1	117	120	238	16
NM_016059.4	NP_057143.1	PPIL1	252	753	57	0	117	97	166	147
NM_016073.3	NP_057157.1	HDGFL3, HDGFRP3	604	1216	54	0	117	103	203	185
NM_016121.4	NP_057205.2	KCTD3	307	2755	108	0	117	54	815	779
NM_016246.2	NP_057330.2	HSD17B14	266	1079	19	1	117	69	270	7
NM_016427.2	NP_057511.2	ELOA2, TCEB3B	353	2615	114	0	117	81	753	715
NM_016497.3	NP_057581.2	MRPL51	169	556	156	0	117	98	128	76
NM_016578.3	NP_057662.3	RSF1	120	4446	30	0	117	111	1441	1431
NM_017510.5	NP_059980.2	TMED9	67	775	63	0	117	80	235	214
NM_018035.2	NP_060505.2	DMAC2, ATP5SL	39	813	39	0	117	78	257	244
NM_018154.2	NP_060624.1	ASF1B	172	781	130	1	117	49	202	13
NM_018663.2	NP_061133.1	PXMP2	65	653	159	0	117	92	195	142
NM_018683.3	NP_061153.1	RNF114	36	723	152	2	117	39	228	44
NM_020117.10	NP_064502.9	LARS1, LARS	294	3825	68	2	117	102	1176	3
NM_020166.4	NP_064551.3	MCCC1	147	2325	92	2	117	104	725	48
NM_020320.4	NP_064716.2	RARS2	75	1812	160	1	117	94	578	14
NM_020438.4	NP_065171.2	DOLPP1	28	745	35	2	117	88	238	14
NM_020466.4	NP_065199.1	LYRM2	39	306	112	1	117	89	88	7
NM_020711.2	NP_065762.1	ERMN	306	1161	7	1	117	83	284	30
NM_020760.3	NP_065811.1	HECW2	256	4975	54	0	117	74	1572	1554
NM_020776.1	NP_065827.1	KIAA1328	22	1756	64	1	117	67	577	5
NM_020922.4	NP_065973.2	WNK3	439	5842	52	1	117	67	1800	15
NM_021059.2	NP_066403.2	H3C14, HIST2H3C	36	447	270	0	117	104	136	46
NM_022120.1	NP_071403.1	OXCT2	93	1647	144	0	117	85	517	469
NM_022154.5	NP_071437.3	SLC39A8	529	1912	94	1	117	89	460	2
NM_022568.3	NP_072090.1	ALDH8A1	69	1533	24	0	117	31	487	479
NM_022735.3	NP_073572.2	ACBD3	47	1634	292	1	117	96	528	12
NM_022776.4	NP_073613.2	OSBPL11	737	2981	27	0	117	106	747	738
NM_022779.8	NP_073616.6	DDX31	152	2708	64	1	117	84	851	1
NM_022895.2	NP_075046.1	C12orf43	28	817	55	1	117	76	262	47
NM_022916.5	NP_075067.2	VPS33A	415	2206	115	1	117	79	596	3
NM_023075.5	NP_075563.3	MPPE1	796	1987	6	0	117	99	396	394
NM_024047.4	NP_076952.1	NUDT9	330	1383	150	0	117	97	350	300
NM_024816.2	NP_079092.2	RABEP2	48	1758	34	1	117	96	569	45
NM_030974.3	NP_112236.3	SHARPIN	484	1648	373	1	117	112	387	44
NM_031307.3	NP_112597.3	PUS3	98	1544	10	1	117	94	481	11
NM_031937.2	NP_114143.1	TBC1D10A	85	1612	22	1	117	103	508	71
NM_032141.3	NP_115517.1	NSRP1	37	1714	22	1	117	118	558	33
NM_032286.2	NP_115662.2	MED10	43	451	175	1	117	54	135	6
NM_032311.4	NP_115687.2	POLDIP3	105	1371	64	1	117	62	421	76
NM_032328.3	NP_115704.1	EFCAB2	265	754	82	1	117	90	162	8
NM_032353.3	NP_115729.1	VPS25	40	571	6	0	117	88	176	174
NM_032505.2	NP_115894.2	KBTBD8	53	1859	43	1	117	78	601	33
NM_032569.3	NP_115958.2	GLYR1	37	1699	119	2	117	95	553	26
NM_032775.3	NP_116164.2	KLHL22	157	2062	151	1	117	70	634	32
NM_032799.4	NP_116188.2	ZDHHC12	36	840	110	2	117	101	267	77
NM_033034.2	NP_149023.2	TRIM5	303	1785	22	1	117	47	493	1
NM_052864.2	NP_443096.1	TIFA	282	837	16	1	117	106	184	7
NM_138568.4	NP_612635.3	EXOC3L2	41	1271	16	1	117	112	409	83
NM_138571.4	NP_612638.3	HINT3	263	812	202	1	117	89	182	3
NM_138619.3	NP_619525.1	GGA3	74	2246	176	2	117	110	723	22
NM_144709.3	NP_653310.2	PUS10	267	1857	28	1	117	82	529	49
NM_145007.3	NP_659444.2	NLRP11	711	3813	138	0	117	92	1033	987
NM_145017.2	NP_659454.2	PPP1R32	132	1410	3	0	117	112	425	424
NM_145248.4	NP_660291.2	SPACA7	49	637	135	0	117	93	195	150
NM_145304.3	NP_660347.1	C7orf33	361	895	62	2	117	88	177	1
NM_145315.4	NP_660358.2	AFG1L, LACE1	206	1652	65	2	117	86	481	57
NM_145650.3	NP_663625.2	MUC15	266	1271	64	1	117	75	334	7
NM_152399.3	NP_689612.3	TMEM155	559	952	67	1	117	53	130	3
NM_152613.2	NP_689826.2	WBP2NL	94	1024	82	1	117	79	309	30
NM_152926.2	NP_690903.1	CPNE1	155	1769	103	1	117	87	537	46
NM_153333.2	NP_699164.1	TCEAL8	227	581	22	1	117	84	117	34
NM_153610.4	NP_705838.3	CMYA5	72	12282	163	1	117	102	4069	19
NM_171825.2	NP_741960.1	CAMK2A	215	1652	115	1	117	87	478	28
NM_173540.2	NP_775811.2	FUT11	43	1522	70	1	117	98	492	3
NM_173602.2	NP_775873.2	DIP2B	156	4887	121	1	117	74	1576	113
NM_175876.4	NP_787072.2	EXOC8	127	2305	6	0	117	117	725	723
NM_177965.3	NP_808880.1	C8orf37	45	669	28	1	117	34	207	12
NM_178000.2	NP_821067.1	PTPA, PPP2R4	287	1259	105	0	117	96	323	288
NM_178578.3	NP_848693.2	PSMF1	202	1018	139	1	117	86	271	33
NM_181672.2	NP_858058.1	OGT	238	3379	51	0	117	36	1046	1029
NM_182617.3	NP_872423.3	ACSM2B	210	1944	51	0	117	83	577	560
NM_183005.4	NP_892117.1	RPP38	716	1568	120	0	117	95	283	243
NM_194281.3	NP_919257.2	INO80C	117	696	88	1	117	107	192	29
NM_198229.2	NP_937872.1	RGS12	904	5248	141	0	117	89	1447	1400
NM_198682.2	NP_941391.2	GYPE	56	293	4	1	117	46	78	3
NM_198989.3	NP_945340.2	DLEU7	293	776	42	0	117	67	160	146
NM_203463.2	NP_982288.1	CERS6	200	1355	52	1	117	81	384	6
NM_206895.2	NP_996778.1	SNORC, C2orf82	102	468	24	0	117	87	121	113
NM_207299.1	NP_997182.1	PLPPR1	399	1377	72	0	117	121	325	301
NM_207511.2	NP_997394.1	C9orf139	1514	2087	162	0	117	92	190	136
NM_000055.3	NP_000046.1	BCHE	167	1976	23	2	118	47	602	20
NM_000159.3	NP_000150.1	GCDH	108	1425	187	1	118	82	438	78
NM_000215.3	NP_000206.2	JAK3	100	3475	44	2	118	57	1124	35
NM_000307.4	NP_000298.3	POU3F4	64	1150	55	1	118	44	361	39
NM_000441.1	NP_000432.1	SLC26A4	224	2567	60	0	118	51	780	760
NM_000446.5	NP_000437.3	PON1	97	1165	33	0	118	102	355	344
NM_001003795.2	NP_001003795.1	GTF2IRD2B	215	3065	60	0	118	85	949	929
NM_001010851.2	NP_001010851.1	ZNF766	43	1450	71	2	118	77	468	29
NM_001010906.1	NP_001010906.1	NUGGC	143	2534	16	1	118	100	796	55
NM_001013690.4	NP_001013712.4	FIGNL2	172	2134	187	1	118	92	653	72
NM_001017928.3	NP_001017928.1	CCDC58	7	442	66	0	118	78	144	122
NM_001032288.2	NP_001027459.1	UBE2V1	70	514	88	1	118	118	147	7
NM_001037335.2	NP_001032412.2	HELZ2	892	8842	70	1	118	106	2649	146
NM_001040129.2	NP_001035218.1	SPINK13	62	347	38	2	118	54	94	14
NM_001042685.1	NP_001036150.1	LGALS9B	65	1133	100	1	118	90	355	78
NM_001056.3	NP_001047.1	SULT1C2	453	1344	118	1	118	76	296	21
NM_001077186.1	NP_001070654.1	MYH14	47	6059	15	0	118	83	2003	1998
NM_001077690.1	NP_001071158.1	ALG9	99	1935	209	2	118	78	611	9
NM_001083537.1	NP_001077006.1	FAM86B1	45	936	205	1	118	82	296	59
NM_001099274.1	NP_001092744.1	TINF2	342	1698	174	0	118	38	451	393
NM_001099645.1	NP_001093115.1	RPL22L1	89	458	76	1	118	79	122	51
NM_001099673.2	NP_001093143.1	RBIS, C8orf59	120	423	37	1	118	101	100	4
NM_001100879.1	NP_001094349.1	ST20	680	920	49	1	118	123	79	3
NM_001105520.1	NP_001098990.1	C17orf100	175	532	353	2	118	77	118	55
NM_001114108.1	NP_001107580.1	TTC22	105	1815	84	0	118	97	569	541
NM_001128423.1	NP_001121895.1	MPV17L	144	735	304	1	118	60	196	3
NM_001130675.1	NP_001124147.1	CLGN	218	2051	23	2	118	96	610	9
NM_001135673.3	NP_001129145.1	ATL2	163	1915	127	1	118	94	583	5
NM_001136107.1	NP_001129579.1	METTL11B	61	913	55	1	118	103	283	33
NM_001143962.1	NP_001137434.1	CAPN8	88	2200	158	2	118	86	703	50
NM_001145014.1	NP_001138486.1	RFPL4A	44	908	29	2	118	67	287	8
NM_001165920.1	NP_001159392.1	SERPINF2	55	1531	81	0	118	66	491	464
NM_001184986.1	NP_001171915.1	NDUFC1	830	1061	106	1	118	58	76	6
NM_001199760.1	NP_001186689.1	ST20-MTHFS	79	619	99	0	118	107	179	146
NM_001252216.1	NP_001239145.1	TAFA1, FAM19A1	216	618	6	0	118	89	133	131
NM_001258240.1	NP_001245169.1	TMEM218	491	839	220	1	118	44	115	25
NM_001282444.1	NP_001269373.1	EHD1	447	2052	22	1	118	69	534	70
NM_001288614.1	NP_001275543.1	CST3	186	627	117	0	118	60	146	107
NM_001288718.1	NP_001275647.1	STAT5A	742	3127	51	0	118	90	794	777
NM_001303256.2	NP_001290185.1	MORC2	398	3497	115	1	118	110	1032	9
NM_001308154.1	NP_001295083.1	RAB15	81	720	16	1	118	95	212	7
NM_001312.3	NP_001303.1	CRIP2	88	715	11	2	118	80	208	43
NM_001316978.1	NP_001303907.1	ZBTB45	541	2077	70	1	118	103	511	11
NM_001323.3	NP_001314.1	CST6	54	504	99	0	118	44	149	116
NM_001625.3	NP_001616.1	AK2	83	803	144	0	118	92	239	191
NM_001642.2	NP_001633.1	APLP2	157	2449	118	1	118	58	763	19
NM_001821.3	NP_001812.2	CHML	164	2135	28	1	118	52	656	3
NM_001997.4	NP_001988.1	FAU	119	521	79	1	118	80	133	1
NM_002201.5	NP_002192.2	ISG20	358	904	27	0	118	75	181	172
NM_002374.3	NP_002365.3	MAP2	248	5732	7	1	118	64	1827	16
NM_002519.2	NP_002510.2	NPAT	102	4386	109	1	118	93	1427	22
NM_002738.6	NP_002729.2	PRKCB	197	2219	94	1	118	39	673	98
NM_002746.2	NP_002737.2	MAPK3	100	1240	87	0	118	85	379	350
NM_002893.3	NP_002884.1	RBBP7	358	1636	15	0	118	100	425	420
NM_002952.3	NP_002943.2	RPS2	23	905	7	1	118	59	293	70
NM_003826.2	NP_003817.1	NAPG	227	1166	77	2	118	87	312	5
NM_004264.4	NP_004255.2	MED21	58	493	61	1	118	71	144	40
NM_004339.3	NP_004330.1	PTTG1IP	287	830	303	0	118	84	180	79
NM_004443.3	NP_004434.2	EPHB3	437	3434	126	0	118	77	998	956
NM_004446.2	NP_004437.2	EPRS1, EPRS	270	4809	79	1	118	83	1512	19
NM_004528.3	NP_004519.1	MGST3	428	887	22	1	118	76	152	5
NM_004613.3	NP_004604.2	TGM2	231	2295	49	1	118	107	687	24
NM_004738.4	NP_004729.1	VAPB	341	1073	70	1	118	92	243	6
NM_004739.3	NP_004730.2	MTA2	390	2397	12	0	118	99	668	664
NM_004918.3	NP_004909.1	TCL1B	51	438	76	1	118	95	128	7
NM_004960.3	NP_004951.1	FUS	105	1686	40	1	118	100	526	170
NM_005048.3	NP_005039.1	PTH2R	214	1867	42	0	118	56	550	536
NM_005050.3	NP_005041.1	ABCD4	152	1973	115	1	118	84	606	2
NM_005371.5	NP_005362.3	METTL1	48	879	87	0	118	89	276	247
NM_005468.2	NP_005459.2	NAALADL1	16	2239	144	0	118	102	740	692
NM_005566.3	NP_005557.1	LDHA	272	1271	96	0	118	107	332	300
NM_005894.2	NP_005885.1	CD5L	143	1187	148	1	118	92	347	103
NM_006015.4	NP_006006.3	ARID1A	373	7231	147	0	118	85	2285	2236
NM_006452.3	NP_006443.1	PAICS	231	1509	40	1	118	33	425	11
NM_006532.3	NP_006523.1	ELL	72	1938	295	1	118	104	621	97
NM_006583.2	NP_006574.1	RRH	34	1048	40	1	118	92	337	18
NM_006606.2	NP_006597.2	RBBP9	76	637	49	1	118	83	186	1
NM_006624.5	NP_006615.2	ZMYND11	341	2150	120	0	118	52	602	562
NM_006638.3	NP_006629.2	RPP40	61	1153	143	2	118	61	363	27
NM_006704.4	NP_006695.1	SUGT1	230	1232	58	1	118	48	333	2
NM_006726.4	NP_006717.2	LRBA	244	8836	46	1	118	90	2863	19
NM_006951.4	NP_008882.2	TAF5	37	2440	178	1	118	131	800	83
NM_006961.3	NP_008892.2	ZNF19	269	1646	9	0	118	71	458	455
NM_007024.4	NP_008955.1	TMEM115	445	1501	193	1	118	97	351	2
NM_007187.4	NP_009118.1	WBP4	417	1548	88	1	118	35	376	43
NM_007193.4	NP_009124.2	ANXA10	164	1139	16	1	118	89	324	14
NM_007225.2	NP_009156.2	NXPH3	284	1043	70	1	118	102	252	42
NM_012382.2	NP_036514.1	TTC33	148	937	82	1	118	62	262	4
NM_012464.4	NP_036596.3	TLL1	647	3689	27	0	118	94	1013	1004
NM_013238.2	NP_037370.2	DNAJC15	401	854	273	0	118	82	150	59
NM_013250.2	NP_037382.2	ZNF215	588	2142	21	0	118	77	517	510
NM_013302.3	NP_037434.1	EEF2K	485	2663	40	1	118	91	725	49
NM_014110.4	NP_054829.2	PPP1R8	95	1151	88	1	118	64	351	1
NM_014172.5	NP_054891.2	PHPT1	615	993	31	1	118	86	125	13
NM_014216.5	NP_055031.2	ITPK1	290	1535	105	0	118	78	414	379
NM_014317.4	NP_055132.2	PDSS1	288	1536	208	1	118	107	415	33
NM_014693.3	NP_055508.3	ECE2	38	2690	247	1	118	92	883	1
NM_014706.3	NP_055521.1	SART3	235	3127	79	1	118	91	963	35
NM_014770.3	NP_055585.1	AGAP2	90	2601	4	1	118	39	836	7
NM_015160.2	NP_055975.1	PMPCA	96	1674	178	1	118	34	525	9
NM_015340.3	NP_056155.1	LARS2	185	2897	31	1	118	34	903	4
NM_015621.2	NP_056436.2	CCDC69	123	1014	94	1	118	73	296	2
NM_016033.2	NP_057117.2	RMDN1	160	1105	132	0	118	100	314	270
NM_016076.4	NP_057160.2	DESI2	266	851	39	0	118	97	194	181
NM_016097.4	NP_057181.1	IER3IP1	97	346	156	0	118	56	82	30
NM_016166.2	NP_057250.1	PIAS1	148	2104	27	0	118	68	651	642
NM_016248.3	NP_057332.1	AKAP11	175	5881	24	0	118	58	1901	1893
NM_016256.3	NP_057340.2	NAGPA	27	1575	426	0	118	58	515	373
NM_016523.2	NP_057607.1	KLRF1	64	760	7	1	118	104	231	5
NM_016639.2	NP_057723.1	TNFRSF12A	86	476	147	0	118	29	129	80
NM_017550.2	NP_060020.1	MIER2	59	1697	108	0	118	85	545	509
NM_017563.4	NP_060033.3	IL17RD	113	2333	178	1	118	101	739	7
NM_017703.2	NP_060173.1	FBXL12	290	1271	136	1	118	74	326	3
NM_017721.4	NP_060191.3	CC2D1A	299	3155	88	1	118	114	951	2
NM_017915.4	NP_060385.3	PARPBP	119	1859	33	0	118	81	579	568
NM_018093.3	NP_060563.2	WDR74	168	1326	28	1	118	77	385	10
NM_018135.3	NP_060605.1	MRPS18A	33	624	247	1	118	100	196	36
NM_018149.6	NP_060619.4	SMG8	42	3018	33	0	118	88	991	980
NM_018176.3	NP_060646.2	LGI2	99	1737	208	1	118	75	545	22
NM_018230.2	NP_060700.2	NUP133	92	3563	198	0	118	87	1156	1090
NM_018244.4	NP_060714.3	UQCC1	179	1079	59	2	118	122	299	47
NM_018431.4	NP_060901.2	DOK5	475	1396	16	1	118	63	306	2
NM_018656.2	NP_061126.2	SLC35E3	222	1164	98	2	118	70	313	58
NM_018710.2	NP_061180.1	PIP4P2, TMEM55A	226	1000	10	1	118	80	257	51
NM_018992.3	NP_061865.1	KCTD5	55	760	218	2	118	39	234	12
NM_019006.3	NP_061879.2	ZFAND6	422	1049	33	0	118	56	208	197
NM_019045.4	NP_061918.3	WDR44	431	3173	31	1	118	31	913	8
NM_020137.4	NP_064522.3	GRIPAP1	35	2561	36	0	118	49	841	829
NM_020148.2	NP_064533.3	SPIRE1	47	2276	356	2	118	113	742	7
NM_020744.3	NP_065795.1	MTA3	229	1777	12	0	118	99	515	511
NM_020871.3	NP_065922.3	LRCH2	31	2329	385	1	118	75	765	10
NM_021044.3	NP_066382.1	DHH	307	1498	103	1	118	76	396	63
NM_021616.5	NP_067629.2	TRIM34	161	1628	147	0	118	97	488	439
NM_022104.3	NP_071387.1	PCIF1	314	2429	7	1	118	70	704	13
NM_022171.2	NP_071503.1	TCTA	221	533	99	0	118	80	103	70
NM_022483.4	NP_071928.2	TMEM267	143	791	25	1	118	73	215	23
NM_024092.2	NP_076997.1	TMEM109	378	1110	26	2	118	101	243	42
NM_024106.2	NP_077011.1	ZNF426	282	1947	22	1	118	57	554	21
NM_024303.2	NP_077279.1	ZSCAN5A	430	1921	23	2	118	79	496	32
NM_024345.4	NP_077321.3	DCAF10	81	1761	127	1	118	58	559	28
NM_024557.5	NP_078833.3	RIC3	105	1212	147	0	118	75	368	319
NM_024562.1	NP_078838.1	TANGO6	12	3297	41	2	118	84	1094	29
NM_024812.2	NP_079088.1	BAALC	205	643	25	1	118	50	145	89
NM_025150.4	NP_079426.2	TARS2	87	2244	156	0	118	107	718	666
NM_025196.3	NP_079472.1	GRPEL1	178	832	129	0	118	104	217	174
NM_030918.5	NP_112180.4	SNX27	16	1603	238	1	118	88	528	1
NM_030957.3	NP_112219.3	ADAMTS10	306	3618	54	0	118	91	1103	1085
NM_032380.4	NP_115756.2	GFM2	458	2798	27	0	118	95	779	770
NM_032800.2	NP_116189.1	C1orf198	44	1028	9	0	118	111	327	324
NM_032999.3	NP_127492.1	GTF2I	409	3406	15	0	118	86	998	993
NM_033105.5	NP_149096.2	DNAJC5B	302	902	5	2	118	72	199	1
NM_033200.2	NP_149977.2	LMF2	31	2155	57	0	118	77	707	688
NM_033224.4	NP_150093.1	PURB	37	976	145	1	118	62	312	1
NM_033414.2	NP_219482.1	ZNF622	120	1554	51	0	118	106	477	460
NM_033505.3	NP_277040.1	SELENOI, EPT1	147	1341	91	1	118	56	397	9
NM_033544.2	NP_291022.2	RCCD1	280	1411	340	1	118	89	376	30
NM_033550.3	NP_291028.3	TP53RK	223	985	31	1	118	89	253	22
NM_078480.2	NP_510965.1	PUF60	83	1763	31	1	118	109	559	48
NM_080598.5	NP_542165.1	DDX39B	528	1815	13	1	118	80	428	113
NM_138367.1	NP_612376.1	ZNF251	256	2272	36	0	118	75	671	659
NM_138771.3	NP_620126.2	CCDC126	457	880	27	0	118	78	140	131
NM_144708.3	NP_653309.3	ANKAR	88	4393	49	1	118	100	1434	8
NM_145063.3	NP_659500.1	OARD1	337	796	16	1	118	75	152	11
NM_145255.3	NP_660298.2	MRPL10	30	816	21	0	118	88	261	254
NM_152236.2	NP_689422.1	GAS2L1	211	2257	84	0	118	88	681	653
NM_152464.2	NP_689677.1	TMEM199	90	717	229	1	118	74	208	3
NM_152643.7	NP_689856.6	KNDC1	14	5264	9	0	118	67	1749	1746
NM_152670.2	NP_689883.1	TEX37	142	685	63	0	118	64	180	159
NM_173537.3	NP_775808.3	GTF2IRD2	215	3065	60	0	118	85	949	929
NM_173826.3	NP_776187.2	TCAIM	427	1918	21	0	118	71	496	489
NM_182663.3	NP_872604.1	RASSF5	73	1330	6	0	118	120	418	416
NM_182701.1	NP_874360.1	GPX6	50	716	121	1	118	65	221	41
NM_199287.2	NP_954981.1	CCDC137	36	906	210	0	118	80	289	219
NM_199328.2	NP_955360.1	CLDN8	226	904	10	1	118	62	225	2
NM_203290.3	NP_976035.1	POLR1C	86	1127	27	0	118	86	346	337
NM_207344.3	NP_997227.1	SPRYD4	75	699	142	1	118	100	207	18
NM_212552.2	NP_997717.2	BOLA3	38	362	8	2	118	43	107	27
NM_000187.3	NP_000178.2	HGD	460	1798	34	1	119	80	445	98
NM_000218.2	NP_000209.2	KCNQ1	108	2139	362	2	119	98	676	162
NM_000285.3	NP_000276.2	PEPD	133	1615	37	1	119	76	493	3
NM_000344.3	NP_000335.1	SMN1	163	1048	6	0	119	88	294	292
NM_000363.4	NP_000354.4	TNNI3	143	776	7	1	119	68	210	46
NM_000387.5	NP_000378.1	SLC25A20	199	1105	150	0	119	82	301	251
NM_000506.4	NP_000497.1	F2	70	1939	76	1	119	78	622	94
NM_000530.7	NP_000521.2	MPZ	67	814	115	1	119	45	248	7
NM_000613.2	NP_000604.1	HPX	61	1450	47	2	119	50	462	13
NM_000890.3	NP_000881.3	KCNJ5	314	1574	19	1	119	76	419	2
NM_000933.3	NP_000924.3	PLCB4	15	3600	13	1	119	59	1194	43
NM_001007074.1	NP_001007075.1	RPL32	213	621	82	1	119	82	135	26
NM_001013579.2	NP_001013597.1	AWAT1	41	1028	39	0	119	53	328	315
NM_001037165.1	NP_001032242.1	FOXK1	10	2212	351	0	119	83	733	616
NM_001039464.3	NP_001034553.2	MROH7	338	4310	34	1	119	57	1323	5
NM_001039697.1	NP_001034786.1	SNAPC3	96	1332	94	1	119	73	411	5
NM_001039770.2	NP_001034859.2	TMPPE	191	1553	69	0	119	60	453	430
NM_001039845.2	NP_001034934.1	MDH1B	278	1835	43	1	119	64	518	33
NM_001042367.1	NP_001035826.1	REC114	28	829	119	2	119	64	266	15
NM_001114106.2	NP_001107578.1	SLC44A3	110	2072	83	2	119	98	653	37
NM_001127395.3	NP_001120867.1	METTL21A	346	1003	16	1	119	67	218	75
NM_001134651.1	NP_001128123.1	EIF4E3	8	683	302	2	119	105	224	1
NM_001135178.2	NP_001128650.1	ZNF397	160	1765	97	1	119	72	534	35
NM_001162491.1	NP_001155963.1	ARL13A	116	887	61	1	119	81	256	1
NM_001177.5	NP_001168.1	ARL1	175	721	51	0	119	79	181	164
NM_001206847.1	NP_001193776.1	SMIM18	150	438	19	1	119	77	95	42
NM_001282468.1	NP_001269397.1	GOLGA8M	98	1997	115	1	119	109	632	33
NM_001282472.1	NP_001269401.1	GOLGA8J	98	1997	115	1	119	109	632	33
NM_001282477.1	NP_001269406.1	TMEM210	19	463	104	2	119	39	147	40
NM_001282490.1	NP_001269419.1	GOLGA8H	96	1995	115	1	119	109	632	33
NM_001282493.1	NP_001269422.1	GOLGA8K	98	1991	115	1	119	109	630	33
NM_001282494.1	NP_001269423.1	GOLGA8N	98	1997	115	1	119	109	632	33
NM_001282693.1	NP_001269622.1	FMO1	159	1758	103	1	119	92	532	66
NM_001282858.1	NP_001269787.1	GON4L	175	6898	157	1	119	123	2240	3
NM_001287426.1	NP_001274355.1	UPP1	664	1597	19	1	119	81	310	15
NM_001308426.1	NP_001295355.1	NME6	340	901	135	0	119	67	186	141
NM_001318786.1	NP_001305715.1	COX4I1	208	718	70	1	119	72	169	4
NM_001318841.1	NP_001305770.1	ZBTB7C	500	2360	7	1	119	78	619	65
NM_001561.5	NP_001552.2	TNFRSF9	261	1029	191	2	119	71	255	4
NM_001813.2	NP_001804.2	CENPE	90	8196	106	1	119	75	2701	30
NM_001902.5	NP_001893.2	CTH	198	1416	70	1	119	73	405	13
NM_002023.4	NP_002014.2	FMOD	404	1535	58	1	119	100	376	87
NM_002053.2	NP_002044.2	GBP1	220	1999	18	0	119	97	592	586
NM_002305.3	NP_002296.1	LGALS1	97	505	307	1	119	70	135	50
NM_002641.3	NP_002632.1	PIGA	116	1571	25	1	119	134	484	51
NM_002674.3	NP_002665.2	PMCH	75	573	9	0	119	93	165	162
NM_002909.4	NP_002900.2	REG1A	103	604	24	0	119	41	166	158
NM_002954.5	NP_002945.1	RPS27A	321	792	73	1	119	98	156	1
NM_003220.2	NP_003211.1	TFAP2A	252	1566	148	1	119	69	437	32
NM_003455.3	NP_003446.2	ZNF202	428	2375	57	0	119	56	648	629
NM_003720.3	NP_003711.1	PSMG1	129	996	232	1	119	104	288	2
NM_004067.3	NP_004058.1	CHN2	437	1844	49	1	119	64	468	86
NM_004120.4	NP_004111.2	GBP2	314	2090	30	0	119	80	591	581
NM_004366.5	NP_004357.3	CLCN2	172	2869	27	0	119	75	898	889
NM_004483.4	NP_004474.2	GCSH	97	619	173	2	119	97	173	27
NM_004696.2	NP_004687.1	SLC16A4	250	1714	46	1	119	45	487	6
NM_005019.4	NP_005010.2	PDE1A	233	1871	78	0	119	71	545	519
NM_005025.4	NP_005016.1	SERPINI1	431	1664	42	0	119	117	410	396
NM_005139.2	NP_005130.1	ANXA3	310	1282	67	1	119	20	323	22
NM_005142.2	NP_005133.2	CBLIF, GIF	48	1302	74	2	119	38	417	83
NM_005328.2	NP_005319.1	HAS2	538	2197	20	2	119	69	552	33
NM_005741.4	NP_005732.2	ZNF263	332	2384	199	1	119	107	683	19
NM_005766.3	NP_005757.1	FARP1	418	3556	135	0	119	84	1045	1000
NM_005772.4	NP_005763.3	RCL1	258	1380	178	1	119	48	373	6
NM_005921.1	NP_005912.1	MAP3K1	501	5040	489	0	119	76	1512	1349
NM_005933.3	NP_005924.2	KMT2A	23	11933	433	1	119	81	3969	4
NM_005968.4	NP_005959.2	HNRNPM	80	2273	51	0	119	82	730	713
NM_006029.4	NP_006020.4	PNMA1	786	1848	6	0	119	100	353	351
NM_006415.3	NP_006406.1	SPTLC1	104	1526	36	0	119	85	473	461
NM_006424.2	NP_006415.2	SLC34A2	81	2154	25	1	119	66	690	36
NM_006798.4	NP_006789.3	UGT2A1	116	1700	64	1	119	110	527	2
NM_007000.3	NP_008931.1	UPK1A	27	804	116	2	119	85	258	19
NM_007022.4	NP_008953.1	CYB561D2	381	1050	153	0	119	66	222	171
NM_007364.3	NP_031390.1	TMED3	188	842	190	1	119	112	217	5
NM_012412.4	NP_036544.1	H2AZ2, H2AFV	155	542	130	1	119	74	128	35
NM_012478.3	NP_036610.2	WBP2	123	909	66	0	119	94	261	239
NM_013986.3	NP_053733.2	EWSR1	328	2314	85	1	119	81	661	47
NM_014176.3	NP_054895.1	UBE2T	136	730	36	0	119	82	197	185
NM_014319.4	NP_055134.2	LEMD3	26	2762	40	1	119	56	911	17
NM_014437.4	NP_055252.2	SLC39A1	486	1461	175	1	119	102	324	10
NM_015364.4	NP_056179.3	LY96	114	597	85	1	119	72	160	23
NM_015693.3	NP_056508.2	INTU	103	2932	76	1	119	88	942	44
NM_015702.2	NP_056517.1	MMADHC	205	1096	7	1	119	73	296	18
NM_015909.3	NP_056993.2	NBAS	44	7160	70	1	119	82	2371	64
NM_016006.5	NP_057090.2	ABHD5	123	1173	53	2	119	117	349	17
NM_016422.3	NP_057506.2	RNF141	153	846	67	1	119	101	230	10
NM_016518.2	NP_057602.2	PIPOX	326	1499	145	1	119	66	390	5
NM_016586.2	NP_057670.2	MBIP	88	1123	59	2	119	123	344	24
NM_016616.4	NP_057700.3	NME8	372	2139	61	1	119	76	588	8
NM_017411.3	NP_059107.1	SMN2	163	1048	6	0	119	88	294	292
NM_017434.4	NP_059130.2	DUOX1	346	5002	23	2	119	75	1551	24
NM_017901.5	NP_060371.2	TPCN1	314	2765	16	1	119	55	816	7
NM_017902.2	NP_060372.2	HIF1AN	75	1125	82	1	119	77	349	17
NM_018050.2	NP_060520.2	MANSC1	258	1554	106	1	119	104	431	45
NM_018088.3	NP_060558.3	FAM90A1	559	1954	3	0	119	118	464	463
NM_018284.2	NP_060754.2	GBP3	205	1993	18	0	119	97	595	589
NM_019027.3	NP_061900.2	RBM47	261	1836	27	0	119	87	524	515
NM_019858.1	NP_062832.1	GPR162	535	2302	91	1	119	56	588	24
NM_020183.4	NP_064568.3	ARNTL2	219	2130	111	0	119	104	636	599
NM_020191.2	NP_064576.1	MRPS22	8	1091	135	0	119	100	360	315
NM_020750.2	NP_065801.1	XPO5	211	3826	6	0	119	77	1204	1202
NM_020830.4	NP_065881.1	WDFY1	103	1336	149	2	119	123	410	28
NM_020840.2	NP_065891.1	FNIP2	218	3563	113	2	119	105	1114	4
NM_020905.3	NP_065956.1	RDH14	121	1132	120	0	119	99	336	296
NM_021250.3	NP_067073.1	LILRA5	120	1020	8	2	119	71	299	48
NM_022066.3	NP_071349.3	UBE2O	65	3944	400	1	119	89	1292	1
NM_022337.2	NP_071732.1	RAB38	83	719	222	0	119	89	211	137
NM_022456.4	NP_071901.2	RAB3IP	371	1754	7	1	119	58	460	9
NM_023937.3	NP_076426.1	MRPL34	225	504	151	1	119	85	92	19
NM_024065.4	NP_076970.1	PDCL3	112	832	26	2	119	41	239	2
NM_024779.4	NP_079055.3	PIP4K2C	131	1397	178	1	119	78	421	9
NM_032173.3	NP_115549.2	ZNRF3	93	2604	17	2	119	64	836	1
NM_032389.4	NP_115765.2	ARFGAP2	272	1838	237	0	119	26	521	442
NM_032442.2	NP_115818.2	NEURL4	7	4696	247	1	119	72	1562	23
NM_032608.6	NP_115997.5	MYO18B	259	7963	357	0	119	97	2567	2448
NM_052898.1	NP_443130.1	XKR4	32	1985	30	0	119	92	650	640
NM_053285.1	NP_444515.1	TEKT1	110	1367	136	1	119	32	418	13
NM_080614.1	NP_542181.1	WFDC3	84	780	3	0	119	125	231	230
NM_080750.4	NP_542788.1	DPH3P1	1098	1335	13	1	119	49	78	50
NM_138295.4	NP_612152.1	PKD1L1	51	8601	31	1	119	78	2849	20
NM_139243.3	NP_640336.1	ADAD1	232	1963	54	0	119	84	576	558
NM_145305.2	NP_660348.2	SLC25A43	109	1135	295	1	119	96	341	24
NM_152308.2	NP_689521.1	RMI2	34	478	177	0	119	45	147	88
NM_152677.2	NP_689890.1	ZSCAN4	697	1999	132	0	119	90	433	389
NM_153823.3	NP_722545.2	GSG1	199	1180	9	0	119	80	326	323
NM_173470.2	NP_775741.1	MMGT1	388	784	90	0	119	32	131	101
NM_173657.2	NP_775928.1	C3orf33	291	1047	18	0	119	104	251	245
NM_173846.4	NP_776245.2	TPPP2	188	701	72	0	119	82	170	146
NM_175058.4	NP_778228.3	PLEKHA7	15	3381	64	1	119	111	1121	29
NM_180982.2	NP_851313.1	MRPL52	30	399	148	1	119	51	122	9
NM_181654.3	NP_857637.1	CPLX4	187	670	12	0	119	67	160	156
NM_181892.3	NP_871621.1	UBE2D3	675	1122	59	2	119	108	148	8
NM_184234.2	NP_909122.1	RBM39	409	2002	27	0	119	98	530	521
NM_203390.2	NP_976324.2	RBM12B	193	3199	88	1	119	73	1001	5
NM_206831.2	NP_996662.1	DPH3	113	362	13	1	119	50	82	50
NM_207372.2	NP_997255.2	SH2D4B	430	1504	24	0	119	95	357	349
NM_000026.3	NP_000017.1	ADSL	59	1514	19	1	120	94	484	58
NM_000336.2	NP_000327.2	SCNN1B	176	2099	150	0	120	86	640	590
NM_000371.3	NP_000362.1	TTR	136	580	96	0	120	53	147	115
NM_000593.5	NP_000584.2	TAP1	155	2582	180	0	120	110	808	748
NM_000860.5	NP_000851.2	HPGD	447	1248	148	1	120	45	266	21
NM_001012715.3	NP_001012733.2	C9orf106	53	752	7	1	120	48	232	3
NM_001012754.3	NP_001012772.1	NHLRC3	329	1373	145	1	120	56	347	28
NM_001039348.2	NP_001034437.1	EFEMP1	501	1983	24	0	120	105	493	485
NM_001039888.3	NP_001034977.1	ANKRD34A	1295	2786	94	1	120	48	496	10
NM_001040667.2	NP_001035757.1	HSF4	965	2444	71	2	120	108	492	41
NM_001114122.2	NP_001107594.1	CHEK1	897	2328	58	1	120	56	476	7
NM_001128076.1	NP_001121548.1	SPDYE4	177	891	85	1	120	25	237	11
NM_001128930.2	NP_001122402.1	ENTPD4	272	2099	102	0	120	71	608	574
NM_001136050.2	NP_001129522.1	DHRS1	277	1219	12	0	120	80	313	309
NM_001143978.2	NP_001137450.1	ZCCHC18	1206	2418	43	1	120	122	403	11
NM_001160223.1	NP_001153695.1	RNF170	477	1254	40	1	120	33	258	5
NM_001164277.1	NP_001157749.1	SLC37A4	757	2047	16	1	120	106	429	6
NM_001192.2	NP_001183.2	TNFRSF17	218	773	9	0	120	104	184	181
NM_001205248.1	NP_001192177.1	ACSL6	171	2265	96	0	120	115	697	665
NM_001239.3	NP_001230.1	CCNH	239	1211	92	2	120	84	323	12
NM_001257359.1	NP_001244288.1	SAMD14	378	1632	31	1	120	35	417	60
NM_001277291.1	NP_001264220.1	ZNF891	353	1988	9	0	120	84	544	541
NM_001277308.1	NP_001264237.1	GOLGA8O	98	1997	115	1	120	109	632	33
NM_001278482.1	NP_001265411.1	SUPT20H	386	2588	40	1	120	89	733	44
NM_001282484.1	NP_001269413.1	GOLGA8R	98	1994	115	1	120	109	631	33
NM_001287432.1	NP_001274361.1	ARFIP1	416	1538	52	1	120	79	373	15
NM_001290208.1	NP_001277137.1	ZNF717	202	2947	118	1	120	44	914	10
NM_001301733.1	NP_001288662.1	COA6	545	785	15	0	120	62	79	74
NM_001319193.1	NP_001306122.1	FBF1	83	3530	23	2	120	90	1148	1
NM_001322495.1	NP_001309424.1	GSS	928	2353	139	1	120	75	474	28
NM_001988.3	NP_001979.2	EVPL	254	6356	135	0	120	69	2033	1988
NM_002545.4	NP_002536.1	OPCML	545	1583	103	1	120	73	345	10
NM_002964.4	NP_002955.2	S100A8	170	452	79	1	120	53	93	7
NM_002967.3	NP_002958.2	SAFB	171	2919	139	1	120	83	915	10
NM_003105.5	NP_003096.1	SORL1	129	6774	193	1	120	73	2214	33
NM_003117.4	NP_003108.2	SPAM1	439	1975	92	2	120	61	511	26
NM_003297.3	NP_003288.2	NR2C1	256	2068	45	0	120	89	603	588
NM_003478.4	NP_003469.2	CUL5	616	2959	53	2	120	110	780	23
NM_003621.3	NP_003612.2	PPFIBP2	393	3024	10	1	120	53	876	41
NM_003799.2	NP_003790.1	RNMT	241	1672	28	1	120	78	476	12
NM_003844.3	NP_003835.3	TNFRSF10A	106	1513	174	0	120	91	468	410
NM_004066.2	NP_004057.1	CETN1	66	585	168	0	120	84	172	116
NM_004131.5	NP_004122.2	GZMB	109	853	49	1	120	84	247	22
NM_004461.2	NP_004452.1	FARSA	48	1575	7	1	120	42	508	38
NM_004520.4	NP_004511.2	KIF2A	311	2432	61	1	120	99	706	8
NM_004536.2	NP_004527.2	NAIP	718	4930	88	1	120	85	1403	8
NM_004703.5	NP_004694.2	RABEP1	224	2813	73	1	120	54	862	32
NM_004741.4	NP_004732.2	NOLC1	235	2335	130	1	120	84	699	7
NM_004854.4	NP_004845.1	CHST10	398	1469	29	2	120	53	356	11
NM_005809.5	NP_005800.3	PRDX2	180	777	64	1	120	63	198	6
NM_005909.4	NP_005900.2	MAP1B	264	7671	194	2	120	105	2468	6
NM_006441.3	NP_006432.1	MTHFS	61	673	69	0	120	79	203	180
NM_006612.5	NP_006603.2	KIF1C	357	3669	67	1	120	77	1103	84
NM_006836.1	NP_006827.1	GCN1	13	8029	187	1	120	105	2671	35
NM_007184.3	NP_009115.2	NISCH	134	4649	115	1	120	100	1504	7
NM_012387.2	NP_036519.2	PADI4	28	2020	46	1	120	68	663	8
NM_013269.5	NP_037401.1	CLEC2D	27	603	4	1	120	45	191	32
NM_014674.2	NP_055489.1	EDEM1	132	2106	5	2	120	126	657	174
NM_014956.4	NP_055771.4	CEP164	147	4530	52	1	120	77	1460	28
NM_016128.3	NP_057212.1	COPG1	100	2725	25	1	120	82	874	46
NM_016154.4	NP_057238.3	RAB4B	157	799	65	2	120	90	213	7
NM_016522.2	NP_057606.1	NTM	664	1699	103	1	120	73	344	10
NM_020341.3	NP_065074.1	PAK5, PAK7	545	2705	156	0	120	40	719	667
NM_020703.2	NP_065754.2	AMIGO1	382	1864	160	1	120	87	493	19
NM_020848.3	NP_065899.1	JCAD, KIAA1462	164	4244	31	1	120	62	1359	55
NM_020980.4	NP_066190.2	AQP9	370	1258	119	2	120	39	295	85
NM_021101.4	NP_066924.1	CLDN1	240	876	50	2	120	71	211	50
NM_022842.4	NP_073753.3	CDCP1	135	2646	198	0	120	111	836	770
NM_024091.3	NP_076996.2	FASTKD3	172	2161	51	0	120	85	662	645
NM_024105.3	NP_077010.1	ALG12	274	1741	127	1	120	100	488	30
NM_024713.2	NP_078989.1	KATNBL1	160	1075	19	1	120	111	304	30
NM_024881.4	NP_079157.3	SLC35E1	18	1251	409	1	120	56	410	20
NM_025238.3	NP_079514.1	BTBD1	203	1652	208	1	120	85	482	63
NM_031498.2	NP_113686.1	GNGT2	307	517	36	0	120	83	69	57
NM_032087.2	NP_114476.1	PCDHGA7	161	2615	327	0	120	77	817	708
NM_032219.3	NP_115595.2	SLC49A3, MFSD7	314	1994	192	0	120	50	559	495
NM_032231.5	NP_115607.1	CIAO2A, FAM96A	240	723	96	0	120	76	160	128
NM_032758.3	NP_116147.1	PHF5A	51	384	74	2	120	84	110	1
NM_033400.2	NP_207646.2	ZFHX2	356	8075	55	1	120	71	2572	32
NM_058004.3	NP_477352.3	PI4KA	87	6396	174	0	120	36	2102	2044
NM_133460.2	NP_597717.1	ZNF418	307	2338	25	1	120	88	676	3
NM_138621.4	NP_619527.1	BCL2L11	288	885	19	1	120	80	198	1
NM_138777.4	NP_620132.1	MRRF	364	1153	27	0	120	46	262	253
NM_144598.4	NP_653199.2	LRRC28	240	1344	109	1	120	82	367	11
NM_144673.2	NP_653274.1	CMTM2	160	907	303	0	120	101	248	147
NM_144719.3	NP_653320.3	CCDC13	84	2232	10	1	120	68	715	34
NM_152546.2	NP_689759.2	SRFBP1	72	1362	45	0	120	83	429	414
NM_152617.3	NP_689830.2	RNF168	595	2311	57	0	120	44	571	552
NM_173798.3	NP_776159.1	ZCCHC12	554	1763	43	1	120	61	402	11
NM_181699.2	NP_859050.1	PPP2R1B	84	2088	49	1	120	80	667	11
NM_182513.3	NP_872319.1	SPC24	36	630	171	0	120	79	197	140
NM_182520.2	NP_872326.2	C22orf15	286	733	15	0	120	95	148	143
NM_183047.3	NP_898868.1	ZMYND8	219	3786	60	0	120	73	1188	1168
NM_207113.2	NP_996996.1	SLC37A3	205	1690	13	1	120	98	494	17
NM_213605.2	NP_998770.2	ZNF517	107	1586	6	0	120	117	492	490
NM_001001437.3	NP_001001437.2	CCL3L3	75	357	42	0	121	102	93	79
NM_001008727.3	NP_001008727.1	ZNF121	232	1405	16	1	121	84	390	58
NM_001013699.2	NP_001013721.2	H3-5, H3F3C	75	483	357	0	121	89	135	16
NM_001014446.2	NP_001014446.1	OCIAD2	233	698	37	1	121	71	154	48
NM_001017420.2	NP_001017420.1	ESCO2	83	1889	127	1	121	88	601	14
NM_001023563.3	NP_001018857.2	ZNF805	207	2091	6	0	121	117	627	625
NM_001025090.1	NP_001020261.1	MBP	91	607	63	0	121	74	171	150
NM_001040443.2	NP_001035533.1	PHF11	392	1388	117	0	121	73	331	292
NM_001042473.3	NP_001035938.1	ACBD5	171	1644	73	1	121	86	490	9
NM_001080415.1	NP_001073884.1	U2SURP	99	3189	58	1	121	75	1029	69
NM_001080444.1	NP_001073913.1	IGSF5	103	1327	50	2	121	87	407	21
NM_001085487.2	NP_001078956.1	MYSM1	23	2510	19	1	121	64	828	8
NM_001098515.1	NP_001091985.1	MRGPRF	367	1399	48	0	121	88	343	327
NM_001107.4	NP_001098.1	ACYP1	104	404	34	1	121	74	99	25
NM_001127357.1	NP_001120829.1	PHTF2	126	2382	19	1	121	78	751	2
NM_001130864.1	NP_001124336.1	PWWP2A	57	2325	78	0	121	75	755	729
NM_001134493.1	NP_001127965.1	TOMM6	255	480	43	1	121	57	74	30
NM_001164379.1	NP_001157851.1	FAM180B	91	643	79	1	121	81	183	22
NM_001171976.1	NP_001165447.1	CDHR2	274	4207	11	2	121	119	1310	32
NM_001185077.2	NP_001172006.1	ARHGDIA	366	981	61	1	121	91	204	51
NM_001242802.1	NP_001229731.1	ZNF790	429	2340	12	0	121	31	636	632
NM_001286067.1	NP_001272996.1	C11orf54	364	1312	25	1	121	51	315	15
NM_001287492.2	NP_001274421.1	FIGNL1	831	2856	38	2	121	83	674	35
NM_001762.3	NP_001753.1	CCT6A	164	1760	129	0	121	91	531	488
NM_001864.3	NP_001855.1	COX7A1	462	702	109	1	121	97	79	6
NM_002825.6	NP_002816.1	PTN	553	1060	146	2	121	126	168	25
NM_003417.4	NP_003408.1	ZNF264	414	2298	49	1	121	36	627	4
NM_004182.3	NP_004173.1	UXT	75	549	127	1	121	40	157	9
NM_004299.5	NP_004290.2	ABCB7	68	2330	15	0	121	103	753	748
NM_004319.2	NP_004310.1	ASTN1	228	4113	165	0	121	141	1294	1239
NM_004550.4	NP_004541.1	NDUFS2	448	1840	118	1	121	87	463	37
NM_005324.4	NP_005315.1	H3-3B, H3F3B	289	700	360	0	121	89	136	16
NM_005645.3	NP_005636.1	TAF13	55	430	7	1	121	65	124	36
NM_005781.4	NP_005772.3	TNK2	543	3660	82	1	121	95	1038	35
NM_005897.2	NP_005888.1	IPP	267	2022	7	1	121	61	584	27
NM_006099.3	NP_006090.2	PIAS3	91	1978	27	0	121	58	628	619
NM_006923.3	NP_008854.2	SDF2	296	932	142	1	121	102	211	9
NM_012124.2	NP_036256.2	CHORDC1	410	1409	64	1	121	102	332	15
NM_012145.3	NP_036277.2	DTYMK	185	824	415	1	121	41	212	29
NM_012201.5	NP_036333.2	GLG1	50	3662	27	0	121	99	1203	1194
NM_012233.2	NP_036365.1	RAB3GAP1	43	2989	65	2	121	109	981	8
NM_012292.4	NP_036424.2	ARHGAP45, HMHA1	240	3651	27	0	121	72	1136	1127
NM_012473.3	NP_036605.2	TXN2	77	578	107	2	121	113	166	26
NM_013254.3	NP_037386.1	TBK1	159	2349	64	1	121	87	729	21
NM_014315.2	NP_055130.1	KLHDC2	400	1621	7	1	121	81	406	33
NM_014797.2	NP_055612.2	ZBTB24	168	2262	133	1	121	100	697	19
NM_015154.2	NP_055969.1	MESD, MESDC2	87	792	175	1	121	101	234	37
NM_015358.2	NP_056173.1	MORC3	76	2896	115	1	121	88	939	6
NM_015488.4	NP_056303.3	PNKD	144	1302	49	1	121	75	385	55
NM_015836.3	NP_056651.1	WARS2	28	1111	15	0	121	67	360	355
NM_015859.3	NP_056943.1	GTF2A1	434	1565	58	1	121	87	376	5
NM_015973.4	NP_057057.2	GAL	258	630	136	1	121	71	123	26
NM_016524.3	NP_057608.2	SYT17	434	1859	71	2	121	74	474	19
NM_018047.2	NP_060517.1	RBM22	122	1385	49	1	121	84	420	19
NM_018930.3	NP_061753.1	PCDHB10	174	2577	205	1	121	73	800	40
NM_018955.3	NP_061828.1	UBB	394	1084	73	1	121	92	229	1
NM_019050.2	NP_061923.2	USP53	1066	4288	5	2	121	79	1073	32
NM_019111.4	NP_061984.2	HLA-DRA	109	874	51	0	121	67	254	237
NM_020243.4	NP_064628.1	TOMM22	30	459	109	1	121	96	142	3
NM_021032.4	NP_066360.1	FGF12	826	1558	258	0	121	81	243	157
NM_021079.4	NP_066565.1	NMT1	31	1522	54	0	121	79	496	478
NM_021103.3	NP_066926.1	TMSB10	95	230	18	0	121	96	44	38
NM_021628.2	NP_067641.2	ALOXE3	370	2506	120	0	121	74	711	671
NM_024341.2	NP_077317.2	ZNF557	485	1778	94	1	121	40	430	3
NM_024641.3	NP_078917.2	MANEA	180	1569	66	0	121	63	462	440
NM_024666.4	NP_078942.3	AAGAB	105	1053	115	1	121	79	315	3
NM_024953.3	NP_079229.2	NAA25	58	2977	16	1	121	77	972	32
NM_032320.6	NP_115696.2	BTBD10	263	1691	22	1	121	66	475	41
NM_032549.3	NP_115938.1	IMMP2L	443	971	129	0	121	86	175	132
NM_032834.3	NP_116223.3	ALG10	319	1741	105	0	121	54	473	438
NM_032918.2	NP_116307.1	RERG	397	997	103	1	121	92	199	24
NM_033540.2	NP_284941.2	MFN1	126	2352	154	1	121	106	741	3
NM_080913.3	NP_550435.1	ASGR2	267	1131	46	1	121	102	287	29
NM_144693.2	NP_653294.1	ZNF558	688	1897	94	1	121	40	402	3
NM_145049.4	NP_659486.2	UBLCP1	340	1297	23	2	121	113	318	14
NM_145239.2	NP_660282.2	PRRT2	301	1324	30	0	121	89	340	330
NM_172193.2	NP_751943.1	KLHDC1	90	1311	109	1	121	83	406	99
NM_173811.3	NP_776172.1	HARBI1	248	1298	43	1	121	84	349	15
NM_174916.2	NP_777576.1	UBR1	66	5316	33	0	121	83	1749	1738
NM_178129.4	NP_835230.1	P2RY8	248	1328	45	0	121	68	359	344
NM_178335.2	NP_848018.1	CCDC50	590	2039	50	2	121	84	482	21
NM_182482.2	NP_872288.2	BAGE2	208	538	57	0	121	65	109	90
NM_182627.2	NP_872433.1	WDR53	603	1680	49	1	121	64	358	26
NM_183233.2	NP_899056.2	SLC22A18	218	1493	48	0	121	86	424	408
NM_198153.2	NP_937796.1	TREML4	104	707	116	2	121	71	200	63
NM_198273.2	NP_938014.1	LYSMD3	148	1069	64	1	121	50	306	41
NM_203407.2	NP_981952.1	EZHIP, CXorf67	102	1614	18	0	121	79	503	497
NM_207343.3	NP_997226.2	RNF214	108	2220	34	1	121	56	703	23
NM_207398.2	NP_997281.2	GBP7	139	2056	18	0	121	75	638	632
NM_000310.3	NP_000301.1	PPT1	232	1153	47	2	122	69	306	38
NM_000722.3	NP_000713.2	CACNA2D1	347	3623	104	2	122	101	1091	3
NM_001007544.3	NP_001007545.1	RHEX, C1orf186	639	1158	15	0	122	87	172	167
NM_001012334.2	NP_001012334.1	MDK	222	654	283	1	122	97	143	12
NM_001013620.3	NP_001013642.1	ALG10B	139	1561	105	0	122	54	473	438
NM_001039753.2	NP_001034842.2	EML6	50	5927	260	2	122	56	1958	6
NM_001040445.2	NP_001035535.1	ASB1	143	1151	124	1	122	65	335	67
NM_001040702.1	NP_001035792.1	DEFB104B	14	233	86	2	122	80	72	34
NM_001136109.1	NP_001129581.1	CASP5	32	1163	36	0	122	108	376	364
NM_001145475.1	NP_001138947.1	FAM186A	138	7194	12	0	122	101	2351	2347
NM_001166400.1	NP_001159872.1	MAGEA8	549	1506	75	0	122	48	318	293
NM_001194986.1	NP_001181915.1	TRABD2B	101	1655	390	0	122	35	517	387
NM_001197129.1	NP_001184058.1	SYS1	243	714	63	0	122	107	156	135
NM_001305203.1	NP_001292132.1	ZFP90	302	2213	52	1	122	79	636	24
NM_001321386.2	NP_001308315.1	PTN	533	1040	146	2	122	126	168	25
NM_001455.3	NP_001446.1	FOXO3	343	2365	165	0	122	63	673	618
NM_002253.2	NP_002244.1	KDR	302	4373	241	1	122	99	1356	12
NM_003098.2	NP_003089.1	SNTA1	272	1790	80	2	122	109	505	96
NM_003100.3	NP_003091.2	SNX2	108	1668	169	1	122	115	519	9
NM_003168.2	NP_003159.1	SUPT4H1	103	457	88	1	122	86	117	12
NM_003505.1	NP_003496.1	FZD1	413	2357	399	0	122	89	647	514
NM_004006.2	NP_003997.1	DMD	244	11302	31	1	122	63	3685	14
NM_004403.2	NP_004394.1	GSDME, DFNA5	333	1824	40	1	122	31	496	5
NM_004615.3	NP_004606.2	TSPAN7	69	819	15	0	122	90	249	244
NM_005088.2	NP_005079.2	AKAP17A	196	2284	87	0	122	104	695	666
NM_005225.2	NP_005216.1	E2F1	140	1454	32	2	122	58	437	50
NM_005415.4	NP_005406.3	SLC20A1	539	2579	65	2	122	61	679	20
NM_005652.4	NP_005643.2	TERF2	17	1646	126	0	122	104	542	500
NM_006042.2	NP_006033.1	HS3ST3A1	813	2034	81	0	122	54	406	379
NM_006178.3	NP_006169.2	NSF	107	2342	15	0	122	95	744	739
NM_006440.4	NP_006431.2	TXNRD2	189	1764	9	0	122	115	524	519
NM_006443.2	NP_006434.1	DNPH1	17	542	12	0	122	73	174	170
NM_006721.3	NP_006712.2	ADK	94	1183	84	0	122	111	362	334
NM_006870.3	NP_006861.1	DSTN	255	753	25	1	122	54	165	9
NM_012394.3	NP_036526.2	PFDN2	50	515	144	0	122	76	154	106
NM_013279.3	NP_037411.1	MYRF	35	3371	94	1	122	82	1111	34
NM_015107.2	NP_055922.1	PHF8	505	3580	43	1	122	103	1024	1
NM_015253.1	NP_056068.1	WSCD1	327	2055	81	0	122	87	575	548
NM_015354.2	NP_056169.1	NUP188	27	5277	196	1	122	97	1749	1
NM_015514.1	NP_056329.1	NGDN	27	963	75	0	122	110	311	286
NM_016070.3	NP_057154.2	MRPS23	62	635	103	1	122	61	190	6
NM_016143.4	NP_057227.2	NSFL1C	868	1981	124	1	122	36	370	9
NM_017575.4	NP_060045.4	SMG6	55	4315	93	0	122	89	1419	1388
NM_017728.3	NP_060198.3	TMEM104	162	1653	60	0	122	66	496	476
NM_017922.3	NP_060392.3	PRPF39	170	2180	15	0	122	63	669	664
NM_018198.3	NP_060668.2	DNAJC11	106	1786	34	1	122	87	559	7
NM_018368.3	NP_060838.3	LMBRD1	276	1899	94	1	122	64	540	16
NM_020372.3	NP_065105.2	SLC22A17	237	1854	67	1	122	67	538	20
NM_020461.3	NP_065194.2	TUBGCP6	512	5972	127	1	122	103	1819	34
NM_020854.3	NP_065905.2	RELCH, KIAA1468	215	3866	9	0	122	111	1216	1213
NM_022136.4	NP_071419.3	SAMSN1	99	1221	22	1	122	79	373	62
NM_022730.3	NP_073567.1	COPS7B	172	967	121	1	122	46	264	26
NM_024029.4	NP_076934.1	YIPF2	458	1409	28	1	122	54	316	24
NM_024093.2	NP_076998.1	C2orf49	229	928	10	1	122	78	232	32
NM_024649.4	NP_078925.3	BBS1	12	1794	49	1	122	91	593	24
NM_025027.4	NP_079303.2	ZNF606	618	2997	57	0	122	85	792	773
NM_025147.4	NP_079423.1	COQ10B	138	855	47	2	122	74	238	40
NM_032230.2	NP_115606.2	METTL25	69	1881	85	1	122	66	603	33
NM_032501.3	NP_115890.2	ACSS1	80	2150	325	1	122	74	689	19
NM_032532.2	NP_115921.2	FNDC1	200	5885	133	1	122	80	1894	1
NM_033271.2	NP_150374.2	BTBD6	108	1566	225	0	122	92	485	410
NM_033389.3	NP_203747.2	SSH2	40	4312	86	2	122	73	1423	83
NM_033513.2	NP_277048.2	TPGS1	10	883	138	0	122	105	290	244
NM_080389.2	NP_525128.2	DEFB104A	14	233	86	2	122	80	72	34
NM_080916.2	NP_550438.1	DGUOK	85	919	51	0	122	90	277	260
NM_133471.3	NP_597728.1	PPP1R18	1877	3719	105	0	122	71	613	578
NM_144644.3	NP_653245.2	SPATA4	109	1027	130	1	122	61	305	36
NM_148414.2	NP_680780.1	ATXN2L	212	3506	366	0	122	108	1097	975
NM_152289.2	NP_689502.2	ZNF561	205	1666	81	0	122	69	486	459
NM_152584.1	NP_689797.1	HSFY1	97	709	7	1	122	68	203	14
NM_152792.2	NP_690005.2	ASPRV1	577	1609	252	0	122	128	343	259
NM_153716.1	NP_714927.1	HSFY2	117	1323	7	1	122	68	401	14
NM_176817.4	NP_789787.4	TAS2R38	84	1086	34	1	122	53	333	19
NM_182703.5	NP_874362.3	ANKDD1A	29	1598	79	1	122	72	522	7
NM_207333.3	NP_997216.2	ZNF320	238	1768	34	1	122	80	509	3
NM_213609.3	NP_998774.2	TAFA1, FAM19A1	490	892	6	0	122	89	133	131
NM_000442.4	NP_000433.4	PECAM1	213	2430	30	0	123	76	738	728
NM_000984.5	NP_000975.2	RPL23A	24	495	220	1	123	97	156	7
NM_001042388.2	NP_001035847.1	PPP4R1	123	2976	61	1	123	57	950	8
NM_001080508.2	NP_001073977.1	TBX18	55	1879	33	0	123	93	607	596
NM_001099692.1	NP_001093162.1	EIF5AL1	49	514	7	1	123	62	154	88
NM_001256720.1	NP_001243649.1	CLEC19A	69	630	132	0	123	46	186	142
NM_001270551.1	NP_001257480.1	MDK	347	779	283	1	123	97	143	12
NM_001304833.1	NP_001291762.1	OGFOD2	49	1102	76	1	123	98	350	35
NM_001307.5	NP_001298.3	CLDN7	902	1538	36	0	123	107	211	199
NM_001320140.1	NP_001307069.1	RPL6	279	1146	64	1	123	34	288	5
NM_001970.4	NP_001961.1	EIF5A	237	702	7	1	123	76	154	88
NM_002721.4	NP_002712.1	PPP6C	221	1139	25	1	123	93	305	3
NM_003235.4	NP_003226.4	TG	41	8348	79	1	123	33	2768	16
NM_003321.4	NP_003312.3	TUFM	139	1507	9	0	123	102	455	452
NM_003359.3	NP_003350.1	UGDH	323	1808	40	1	123	87	494	18
NM_003447.3	NP_003438.1	ZNF165	827	2285	46	1	123	81	485	4
NM_004181.4	NP_004172.2	UCHL1	96	768	15	0	123	57	223	218
NM_004258.5	NP_004249.2	CD101	68	3134	16	1	123	63	1021	8
NM_004671.4	NP_004662.2	PIAS2	187	2053	27	0	123	76	621	612
NM_005419.3	NP_005410.1	STAT2	203	2759	15	0	123	92	851	846
NM_006308.2	NP_006299.1	HSPB3	189	642	94	1	123	98	150	13
NM_007131.4	NP_009062.2	ZNF75D	2710	4243	6	0	123	88	510	508
NM_012198.4	NP_036330.1	GCA	176	830	57	0	123	98	217	198
NM_015417.4	NP_056232.2	SPEF1	168	879	103	1	123	77	236	37
NM_015607.3	NP_056422.2	CHTOP	379	1126	48	0	123	84	248	232
NM_016002.2	NP_057086.2	SCCPDH	347	1637	256	1	123	55	429	13
NM_016355.3	NP_057439.2	DDX47	22	1390	97	1	123	77	455	50
NM_016558.3	NP_057642.1	SCAND1	703	1243	352	1	123	86	179	80
NM_016835.4	NP_058519.3	MAPT	322	2599	30	0	123	79	758	748
NM_017619.3	NP_060089.1	RNPC3	115	1669	38	2	123	84	517	23
NM_018648.3	NP_061118.1	NOP10	88	283	66	0	123	88	64	42
NM_019051.2	NP_061924.1	MRPL50	45	522	42	0	123	78	158	144
NM_020209.3	NP_064594.3	SHD	1463	2486	136	1	123	72	340	61
NM_020444.4	NP_065177.2	KIAA1191	373	1291	57	0	123	79	305	286
NM_021201.4	NP_067024.1	MS4A7	193	916	21	0	123	94	240	233
NM_021218.2	NP_067041.1	INIP	219	534	90	0	123	66	104	74
NM_022761.2	NP_073598.1	C11orf1	337	790	97	1	123	46	150	36
NM_022918.3	NP_075069.3	TMEM135	202	1579	37	1	123	74	458	26
NM_024063.2	NP_076968.2	SPATA5L1	109	2371	912	0	123	80	753	449
NM_024165.2	NP_077084.1	PHF1	236	1940	106	1	123	80	567	115
NM_031485.3	NP_113673.3	GRWD1	233	1574	48	0	123	65	446	430
NM_032207.3	NP_115583.1	C19orf44	156	2130	30	0	123	61	657	647
NM_032437.3	NP_115813.2	EFCAB7	335	2225	22	1	123	102	629	21
NM_032440.3	NP_115816.2	LCOR	563	1865	9	0	123	46	433	430
NM_032878.3	NP_116267.3	ALKBH6	6	807	15	0	123	113	266	261
NM_053024.3	NP_444252.1	PFN2	98	521	33	0	123	82	140	129
NM_078470.5	NP_510870.1	COX15	617	1850	212	2	123	93	410	19
NM_080865.3	NP_543141.3	GPR62	339	1446	195	0	123	92	368	303
NM_138451.2	NP_612460.1	IQCD	191	1235	21	0	123	107	347	340
NM_138783.3	NP_620138.2	ZNF653	137	1985	565	1	123	101	615	130
NM_144662.2	NP_653263.2	PSMA8	114	885	13	1	123	99	256	23
NM_148919.3	NP_683720.2	PSMB8	43	874	13	1	123	76	276	79
NM_152710.3	NP_689923.3	TBATA	408	1464	10	1	123	92	351	8
NM_172251.2	NP_758455.1	MRPL54	34	451	103	1	123	71	138	6
NM_181807.3	NP_861523.2	DCDC1	238	1303	72	0	123	75	354	330
NM_182918.3	NP_891548.1	ERG	124	1564	96	0	123	94	479	447
NM_198334.2	NP_938148.1	GANAB	127	2962	238	1	123	66	944	9
NM_201400.3	NP_958802.1	EEF2KMT	81	1074	205	1	123	76	330	31
NM_203374.1	NP_976308.1	ZNF784	14	986	91	1	123	86	323	17
NM_000025.2	NP_000016.1	ADRB3	197	1424	38	2	124	88	408	406
NM_000252.2	NP_000243.1	MTM1	76	1888	46	1	124	83	603	27
NM_000419.4	NP_000410.2	ITGA2B	128	3248	124	1	124	39	1039	68
NM_000436.3	NP_000427.1	OXCT1	331	1894	80	2	124	78	520	27
NM_000811.2	NP_000802.2	GABRA6	338	1700	46	1	124	81	453	2
NM_001001346.3	NP_001001346.1	CLDN20	380	1040	97	1	124	50	219	8
NM_001002862.2	NP_001002862.1	DERL3	25	733	222	0	124	114	235	161
NM_001005619.1	NP_001005619.1	ITGB4	8	5426	23	2	124	78	1805	37
NM_001009992.1	NP_001009992.1	ZNF648	208	1915	70	1	124	83	568	5
NM_001012264.3	NP_001012264.1	RNASE13	138	609	60	0	124	75	156	136
NM_001024662.2	NP_001019833.1	RPL6	231	1098	64	1	124	34	288	5
NM_001042550.1	NP_001036015.1	SMC2	350	3944	40	1	124	41	1197	19
NM_001072.3	NP_001063.2	UGT1A6	139	1738	66	0	124	65	532	510
NM_001080480.2	NP_001073949.1	MBOAT1	230	1718	113	2	124	61	495	23
NM_001081550.1	NP_001075019.1	THOC2	32	4814	80	2	124	68	1593	5
NM_001099404.1	NP_001092874.1	SCN5A	194	6245	81	0	124	80	2016	1989
NM_001100409.2	NP_001093879.1	SENP6	1016	4334	79	1	124	79	1105	43
NM_001159352.1	NP_001152824.1	REG4	440	917	15	0	124	85	158	153
NM_001178111.1	NP_001171582.1	SCAMP5	270	978	56	2	124	108	235	80
NM_001189.3	NP_001180.1	NKX3-2	76	1078	447	0	124	83	333	184
NM_001201380.2	NP_001188309.2	CNTNAP3B	410	4277	193	1	124	79	1288	41
NM_001211.5	NP_001202.4	BUB1B	212	3365	42	0	124	84	1050	1036
NM_001242844.1	NP_001229773.1	RNF146	706	1783	36	0	124	109	358	346
NM_001242903.1	NP_001229832.1	AKAP1	555	3267	45	0	124	66	903	888
NM_001258320.1	NP_001245249.1	TP53I11	653	1223	27	0	124	66	189	180
NM_001273.3	NP_001264.2	CHD4	212	5951	57	0	124	76	1912	1893
NM_001286.3	NP_001277.1	CLCN6	167	2777	118	1	124	91	869	39
NM_001287810.3	NP_001274739.1	CYFIP1	293	4055	148	1	124	106	1253	19
NM_001290187.1	NP_001277116.1	KRBA1	44	3239	105	0	124	84	1064	1029
NM_001298.2	NP_001289.1	CNGA3	417	2502	88	1	124	123	694	142
NM_001313941.1	NP_001300870.1	RHOA	375	957	37	1	124	70	193	10
NM_001318918.1	NP_001305847.1	GLIS2	821	2396	130	1	124	39	524	17
NM_001320537.1	NP_001307466.1	SLC37A1	1043	2645	94	1	124	36	533	12
NM_001697.2	NP_001688.1	ATP5PO, ATP5O	91	733	41	2	124	90	213	23
NM_001964.2	NP_001955.1	EGR1	270	1902	21	0	124	101	543	536
NM_002168.3	NP_002159.2	IDH2	164	1523	115	1	124	80	452	19
NM_002195.1	NP_002186.1	INSL4	105	525	89	2	124	83	139	16
NM_002337.3	NP_002328.1	LRPAP1	85	1159	165	0	124	54	357	302
NM_002687.3	NP_002678.2	PNN	97	2251	67	1	124	42	717	14
NM_002805.5	NP_002796.4	PSMC5	81	1302	24	0	124	72	406	398
NM_002951.4	NP_002942.2	RPN2	311	2207	94	1	124	99	631	5
NM_003075.4	NP_003066.2	SMARCC2	113	3758	199	1	124	73	1214	15
NM_003350.2	NP_003341.1	UBE2V2	21	459	109	1	124	101	145	4
NM_003597.4	NP_003588.1	KLF11	162	1701	51	0	124	89	512	495
NM_003658.4	NP_003649.2	BARX2	50	890	75	0	124	38	279	254
NM_003813.3	NP_003804.2	ADAM21	258	2427	10	1	124	44	722	39
NM_004318.3	NP_004309.2	ASPH	269	2546	16	1	124	71	758	54
NM_004595.4	NP_004586.2	SMS	252	1353	33	0	124	52	366	355
NM_004730.3	NP_004721.1	ETF1	222	1536	88	1	124	115	437	4
NM_004853.2	NP_004844.1	STX8	150	861	88	1	124	96	236	12
NM_004952.4	NP_004943.1	EFNA3	70	787	97	1	124	71	238	20
NM_004970.2	NP_004961.1	IGFALS	81	1899	148	1	124	110	605	71
NM_005429.4	NP_005420.1	VEGFC	434	1694	151	1	124	41	419	15
NM_005721.4	NP_005712.1	ACTR3	346	1603	61	1	124	70	418	30
NM_006136.2	NP_006127.1	CAPZA2	103	964	28	1	124	64	286	6
NM_006252.3	NP_006243.2	PRKAA2	71	1730	166	1	124	68	552	5
NM_006380.3	NP_006371.2	APPBP2	309	2067	124	1	124	47	585	28
NM_006952.3	NP_008883.2	UPK1B	89	872	55	1	124	89	260	1
NM_007007.2	NP_008938.2	CPSF6	110	1766	37	1	124	76	551	17
NM_007029.3	NP_008960.2	STMN2	382	922	15	0	124	108	179	174
NM_007203.4	NP_009134.1	PALM2AKAP2, PALM2-AKAP2	192	3504	146	2	124	110	1103	21
NM_009590.3	NP_033720.2	AOC2	44	2315	64	1	124	52	756	3
NM_012162.3	NP_036294.2	FBXL6	76	1696	132	0	124	86	539	495
NM_012324.5	NP_036456.1	MAPK8IP2	134	2609	18	0	124	108	824	818
NM_012325.2	NP_036457.1	MAPRE1	139	946	52	1	124	91	268	12
NM_012423.3	NP_036555.1	RPL13A	76	688	28	1	124	45	203	42
NM_014016.4	NP_054735.3	SACM1L	225	1989	55	1	124	34	587	54
NM_014191.3	NP_055006.1	SCN8A	178	6121	121	1	124	96	1980	48
NM_014397.5	NP_055212.2	NEK6	198	1140	21	0	124	67	313	306
NM_014583.3	NP_055398.1	LMCD1	132	1230	42	0	124	72	365	351
NM_014766.4	NP_055581.3	SCRN1	169	1414	55	1	124	80	414	49
NM_015116.2	NP_055931.1	LRCH1	236	2423	339	0	124	75	728	615
NM_015255.2	NP_056070.1	UBR2	298	5566	53	2	124	98	1755	14
NM_015321.2	NP_056136.2	CRTC1	88	1993	93	0	124	93	634	603
NM_015566.2	NP_056381.1	FAM169A	91	2104	18	0	124	87	670	664
NM_016144.3	NP_057228.1	COMMD10	77	686	42	0	124	91	202	188
NM_016530.2	NP_057614.1	RAB8B	96	720	157	1	124	62	207	64
NM_017740.2	NP_060210.2	ZDHHC7	353	1280	58	1	124	103	308	28
NM_017883.5	NP_060353.2	WDR13	519	1977	121	1	124	80	485	14
NM_017970.3	NP_060440.2	NRDE2	233	3728	43	1	124	107	1164	8
NM_018119.3	NP_060589.1	POLR3E	201	2328	7	1	124	65	708	34
NM_018174.5	NP_060644.4	MAP1S	51	3231	133	1	124	89	1059	27
NM_018362.3	NP_060832.1	LIN7C	27	621	142	1	124	97	197	2
NM_020157.3	NP_064542.1	OTOR	49	436	44	2	124	54	128	19
NM_020348.2	NP_065081.2	CNNM1	289	3145	289	1	124	127	951	136
NM_020458.3	NP_065191.2	TTC7A	368	2945	84	0	124	51	858	830
NM_021826.4	NP_068598.1	FASTKD5	311	2606	94	1	124	81	764	1
NM_022123.2	NP_071406.1	NPAS3	64	2770	82	1	124	87	901	43
NM_022304.2	NP_071640.1	HRH2	1773	2853	10	1	124	105	359	41
NM_022553.5	NP_072047.4	VPS52	290	2462	18	0	124	114	723	717
NM_022915.3	NP_075066.1	MRPL44	69	1068	205	1	124	111	332	16
NM_024621.2	NP_078897.2	VEPH1	419	2921	70	1	124	72	833	17
NM_024663.3	NP_078939.3	NPEPL1	95	1667	336	0	124	74	523	411
NM_024947.3	NP_079223.3	PHC3	34	3022	36	0	124	77	995	983
NM_032138.6	NP_115514.2	KBTBD7	327	2382	190	1	124	85	684	1
NM_032453.1	NP_115829.1	ZNF527	111	1941	24	0	124	81	609	601
NM_033427.2	NP_219499.1	CTTNBP2	92	5084	94	1	124	52	1663	15
NM_033655.3	NP_387504.2	CNTNAP3	239	4106	94	1	124	59	1288	74
NM_053016.5	NP_443749.5	PALM2	192	1428	146	2	124	110	411	21
NM_058170.3	NP_477518.2	OLFM3	418	1795	124	1	124	101	458	41
NM_138358.2	NP_612367.1	TIMM29, C19orf52	75	858	187	1	124	34	260	184
NM_152245.2	NP_689451.1	CPT1B	138	2457	142	1	124	121	772	70
NM_152476.2	NP_689689.2	ZNF560	210	2583	118	1	124	78	790	1
NM_152510.3	NP_689723.1	HORMAD2	460	1384	79	1	124	82	307	5
NM_152903.4	NP_690867.3	KBTBD6	289	2314	172	1	124	96	674	7
NM_153236.3	NP_694968.1	GIMAP7	130	1033	158	2	124	132	300	15
NM_174914.3	NP_777574.2	UGT3A2	132	1704	114	0	124	66	523	485
NM_181463.2	NP_852128.1	MRPL55	289	676	142	1	124	49	128	9
NM_181715.2	NP_859066.1	CRTC2	159	2241	129	0	124	90	693	650
NM_182531.3	NP_872337.2	ZNF778	339	2529	31	1	124	111	729	23
NM_194279.3	NP_919255.2	ISCA2	55	520	233	2	124	28	154	21
NM_198524.2	NP_940926.1	TEX9	27	1203	127	1	124	71	391	17
NM_206966.2	NP_996849.2	C5orf46	37	301	64	1	124	76	87	27
NM_000267.3	NP_000258.1	NF1	383	8840	23	2	125	106	2818	28
NM_000368.4	NP_000359.1	TSC1	234	3729	16	1	125	86	1164	19
NM_000497.3	NP_000488.3	CYP11B1	7	1519	30	0	125	75	503	493
NM_000602.4	NP_000593.1	SERPINE1	157	1366	6	0	125	87	402	400
NM_001011552.3	NP_001011552.2	SLC9A4	457	2854	12	0	125	83	798	794
NM_001013643.1	NP_001013665.1	LINC02868, C1orf137	18	315	36	0	125	35	98	86
NM_001018025.3	NP_001018025.1	MTCP1	626	950	13	1	125	84	107	35
NM_001030288.2	NP_001025459.1	SPN	165	1368	129	0	125	102	400	357
NM_001034850.2	NP_001030022.1	RETREG1, FAM134B	87	1581	38	2	125	69	497	126
NM_001079537.1	NP_001073005.1	TRAPPC6B	335	812	7	1	125	49	158	44
NM_001101676.1	NP_001095146.1	SAMD12	129	615	58	1	125	64	161	48
NM_001123329.1	NP_001116801.1	ZBTB1	391	2533	25	1	125	91	713	5
NM_001135215.1	NP_001128687.1	ZSCAN31	904	2125	391	1	125	87	406	15
NM_001136191.2	NP_001129663.1	KANK2	361	2917	112	1	125	93	851	32
NM_001177880.1	NP_001171351.1	SYT12	230	1496	10	1	125	41	421	6
NM_001193282.2	NP_001180211.2	CFAP99	166	2107	10	1	125	74	646	7
NM_001267863.1	NP_001254792.1	SLIRP	41	365	130	1	125	84	107	40
NM_001270989.1	NP_001257918.1	EPGN	64	529	45	0	125	90	154	139
NM_001308491.1	NP_001295420.1	ERVH48-1	538	1021	57	0	125	91	160	141
NM_001318221.1	NP_001305150.1	AHSP	111	420	82	1	125	66	102	10
NM_001320698.1	NP_001307627.1	ANXA4	1530	2496	6	0	125	120	321	319
NM_001876.3	NP_001867.2	CPT1A	170	2492	73	1	125	93	773	44
NM_001968.4	NP_001959.1	EIF4E	1525	2179	125	2	125	91	217	6
NM_002001.3	NP_001992.1	FCER1A	106	880	12	0	125	69	257	253
NM_002247.3	NP_002238.2	KCNMA1	177	3714	7	1	125	64	1178	22
NM_002741.3	NP_002732.3	PKN1	168	2997	322	1	125	110	942	17
NM_003099.4	NP_003090.2	SNX1	130	1699	208	1	125	109	522	39
NM_003374.2	NP_003365.1	VDAC1	245	1097	19	1	125	48	283	19
NM_003564.2	NP_003555.1	TAGLN2	121	721	22	1	125	86	199	2
NM_003642.3	NP_003633.1	HAT1	76	1336	18	0	125	73	419	413
NM_003673.3	NP_003664.1	TCAP	14	518	71	2	125	86	167	17
NM_003677.4	NP_003668.2	DENR	139	736	70	1	125	49	198	33
NM_003907.2	NP_003898.2	EIF2B5	364	2530	214	1	125	73	721	3
NM_003965.4	NP_003956.2	CCRL2	285	1320	28	1	125	81	344	6
NM_004749.3	NP_004740.2	TBRG4	155	2051	23	2	125	91	631	28
NM_005309.2	NP_005300.1	GPT	223	1714	40	1	125	75	496	2
NM_005536.3	NP_005527.1	IMPA1	127	961	20	2	125	106	277	17
NM_005604.3	NP_005595.2	POU3F2	170	1502	78	0	125	94	443	417
NM_005649.2	NP_005640.2	ZNF354A	198	2016	52	1	125	89	605	24
NM_005883.2	NP_005874.1	APC2	208	7120	135	0	125	79	2303	2258
NM_006017.2	NP_006008.1	PROM1	212	2810	79	1	125	76	865	31
NM_006079.4	NP_006070.2	CITED2	246	1059	12	0	125	67	270	266
NM_006154.3	NP_006145.2	NEDD4	191	2894	145	1	125	45	900	3
NM_006313.2	NP_006304.1	USP15	75	2934	130	1	125	93	952	62
NM_006626.5	NP_006617.1	ZBTB6	87	1362	16	1	125	70	424	17
NM_006793.4	NP_006784.1	PRDX3	75	846	46	1	125	76	256	1
NM_007317.2	NP_015556.1	KIF22	47	2045	39	0	125	112	665	652
NM_012245.2	NP_036377.1	SNW1	27	1638	178	1	125	76	536	65
NM_014181.2	NP_054900.2	LGALSL	353	872	25	1	125	64	172	3
NM_014183.3	NP_054902.1	DYNLRB1	75	366	99	0	125	72	96	63
NM_015040.3	NP_055855.2	PIKFYVE	158	6455	10	1	125	88	2098	29
NM_015047.2	NP_055862.1	EMC1	50	3032	106	1	125	108	993	20
NM_015135.2	NP_055950.1	NUP205	31	6070	38	2	125	54	2012	9
NM_015983.3	NP_057067.1	UBE2D4	97	541	82	1	125	87	147	24
NM_017652.3	NP_060122.2	ZNF586	191	1400	55	1	125	88	402	3
NM_017709.3	NP_060179.2	TENT5C, FAM46C	199	1375	33	0	125	43	391	380
NM_017780.3	NP_060250.2	CHD7	492	9486	15	0	125	99	2997	2992
NM_018915.3	NP_061738.1	PCDHGA2	212	3011	385	1	125	78	932	6
NM_019040.4	NP_061913.3	ELP4	56	1331	172	1	125	82	424	12
NM_019062.1	NP_061935.1	RNF186	177	861	104	2	125	85	227	1
NM_021088.3	NP_066574.2	ZNF2	483	1761	26	2	125	71	425	16
NM_021223.2	NP_067046.1	MYL7	12	540	81	0	125	62	175	148
NM_022060.2	NP_071343.2	ABHD4	69	1098	7	1	125	59	342	10
NM_022133.3	NP_071416.2	SNX16	507	1542	13	1	125	77	344	7
NM_022453.2	NP_071898.2	RNF25	88	1468	85	1	125	75	459	4
NM_024050.5	NP_076955.1	DDA1	127	436	185	2	125	109	102	96
NM_024755.3	NP_079031.2	SLTM	111	3216	259	1	125	83	1034	5
NM_024760.2	NP_079036.1	TLE6	400	1750	145	1	125	94	449	142
NM_025099.5	NP_079375.3	CTC1	59	3713	52	1	125	94	1217	20
NM_025153.2	NP_079429.2	ATP10B	847	5233	52	1	125	106	1461	24
NM_030953.3	NP_112215.1	TIGD6	775	2341	51	0	125	91	521	504
NM_031442.3	NP_113630.1	TMEM47	259	805	21	0	125	71	181	174
NM_032132.4	NP_115508.2	HORMAD1	118	1303	30	0	125	73	394	384
NM_052961.3	NP_443193.1	SLC26A8	135	3048	67	1	125	56	970	26
NM_058230.2	NP_478137.1	ZNF354B	226	2065	76	1	125	72	612	16
NM_080753.2	NP_542791.1	WFDC10A	68	308	84	0	125	99	79	51
NM_144575.2	NP_653176.2	CAPN13	176	2186	90	0	125	106	669	639
NM_152581.3	NP_689794.1	MOSPD2	124	1681	70	1	125	93	518	1
NM_152781.3	NP_689994.2	HEATR9	149	1862	7	1	125	47	570	96
NM_153262.3	NP_694994.2	SYT14	91	1759	37	1	125	53	555	25
NM_173355.3	NP_775491.1	UPP2	194	1148	33	0	125	57	317	306
NM_175882.2	NP_787078.2	SPPL2C	17	2072	184	1	125	31	684	35
NM_199141.1	NP_954592.1	CARM1	126	1953	220	1	125	97	608	50
NM_000061.2	NP_000052.1	BTK	193	2173	118	1	126	86	659	16
NM_000370.3	NP_000361.1	TTPA	32	869	236	2	126	92	278	10
NM_001010896.2	NP_001010896.2	NEBL, C10orf113	51	519	30	0	126	48	155	145
NM_001031710.2	NP_001026880.2	KLHL7	293	2054	90	0	126	64	586	556
NM_001042625.1	NP_001036090.1	CAPSL	95	722	19	1	126	92	208	58
NM_001080457.1	NP_001073926.1	LRRC4B	137	2279	48	0	126	88	713	697
NM_001171203.2	NP_001164674.1	UBAP1	398	1907	31	1	126	64	502	79
NM_001206528.2	NP_001193457.1	CRTAC1	356	2294	24	0	126	78	645	637
NM_001242894.1	NP_001229823.1	ZKSCAN3	333	1950	34	1	126	39	538	13
NM_001243079.1	NP_001230008.1	PLK5	716	1727	33	0	126	92	336	325
NM_001278559.1	NP_001265488.1	ZNF316	556	3571	196	1	126	94	1004	20
NM_001293626.1	NP_001280555.1	MGAM2	59	7607	197	2	126	111	2515	3
NM_001361.4	NP_001352.2	DHODH	21	1209	34	1	126	96	395	2
NM_001618.3	NP_001609.2	PARP1	171	3216	68	2	126	102	1014	21
NM_002449.4	NP_002440.2	MSX2	88	892	22	1	126	96	267	88
NM_003270.3	NP_003261.1	TSPAN6	163	901	160	1	126	59	245	36
NM_003848.3	NP_003839.2	SUCLG2	28	1327	107	2	126	125	432	14
NM_004333.4	NP_004324.2	BRAF	61	2362	66	0	126	72	766	744
NM_005118.3	NP_005109.2	TNFSF15	116	872	48	0	126	104	251	235
NM_005122.4	NP_005113.1	NR1I3	203	1250	16	1	126	83	348	2
NM_006455.2	NP_006446.1	P3H4	284	1598	99	0	126	70	437	404
NM_006978.2	NP_008909.1	RNF113A	215	1247	195	0	126	63	343	278
NM_007359.4	NP_031385.2	CASC3	295	2407	241	1	126	116	703	34
NM_012081.5	NP_036213.2	ELL2	350	2273	43	1	126	100	640	17
NM_013234.3	NP_037366.1	EIF3K	195	852	6	0	126	107	218	216
NM_013338.4	NP_037470.1	ALG5	67	1042	99	0	126	71	324	291
NM_014018.2	NP_054737.1	MRPS28	23	587	121	1	126	69	187	43
NM_014865.3	NP_055680.3	NCAPD2	46	4252	12	0	126	103	1401	1397
NM_014918.4	NP_055733.2	CHSY1	476	2885	190	1	126	74	802	28
NM_015100.3	NP_055915.2	POGZ	315	4548	21	0	126	40	1410	1403
NM_015378.3	NP_056193.2	VPS13D	158	13325	49	1	126	85	4388	4
NM_016287.3	NP_057371.2	HP1BP3	140	1802	114	0	126	76	553	515
NM_018645.5	NP_061115.2	HES6	219	894	46	1	126	84	224	53
NM_022492.4	NP_071937.4	TTC31	23	1583	190	1	126	78	519	87
NM_030798.4	NP_110425.2	RCC1L	144	1539	346	1	126	77	464	73
NM_032673.2	NP_116062.2	PCGF1	26	806	36	0	126	85	259	247
NM_032795.2	NP_116184.2	RPUSD4	54	1188	124	1	126	61	377	4
NM_032849.3	NP_116238.2	MEDAG	341	1253	280	1	126	99	303	3
NM_032864.3	NP_116253.2	PRPF38A	203	1142	22	1	126	82	312	39
NM_032882.5	NP_116271.3	PNMA6A	321	1521	12	0	126	108	399	395
NM_145654.3	NP_663629.1	RDM1	49	904	157	1	126	91	284	56
NM_147190.3	NP_671723.1	CERS5	236	1415	265	1	126	63	392	126
NM_173499.4	NP_775770.1	SPATA8	249	567	15	0	126	83	105	100
NM_175748.3	NP_786924.2	UBR7	236	1514	94	1	126	83	425	21
NM_205834.3	NP_991403.1	LSR	223	2173	144	0	126	94	649	601
NM_000975.3	NP_000966.2	RPL11	45	582	33	0	127	67	178	167
NM_001004736.3	NP_001004736.2	OR5K1	97	1024	21	0	127	90	308	301
NM_001008723.1	NP_001008723.1	CFAP58	134	2753	54	0	127	79	872	854
NM_001012507.3	NP_001012525.1	CENPW	485	752	197	2	127	74	88	1
NM_001013625.3	NP_001013647.2	CFAP126	15	549	28	1	127	102	177	62
NM_001017926.2	NP_001017926.1	ZHX1	705	3327	33	0	127	23	873	862
NM_001031835.2	NP_001027005.1	PHKB	185	3446	16	1	127	80	1086	10
NM_001111039.2	NP_001104509.1	ZSCAN26	270	1707	175	1	127	85	478	10
NM_001143939.2	NP_001137411.1	ZNF534	341	2366	34	1	127	83	674	3
NM_001164309.2	NP_001157781.1	ZNF415	239	1907	52	1	127	93	555	5
NM_001185118.1	NP_001172047.1	MYNN	496	2329	118	1	127	92	610	28
NM_001297577.1	NP_001284506.1	PEA15	311	704	231	0	127	84	130	53
NM_001545.2	NP_001536.1	MRPL58, ICT1	23	644	187	1	127	63	206	11
NM_002028.3	NP_002019.1	FNTB	165	1479	271	1	127	62	437	23
NM_002421.3	NP_002412.1	MMP1	143	1553	88	1	127	91	469	3
NM_003043.5	NP_003034.2	SLC6A6	325	2188	220	1	127	87	620	27
NM_006367.3	NP_006358.1	CAP1	229	1657	9	0	127	89	475	472
NM_012191.3	NP_036323.2	NAA80, NAT6	207	1134	66	0	127	51	308	286
NM_013374.5	NP_037506.2	PDCD6IP	158	2765	214	1	127	79	868	19
NM_014170.2	NP_054889.2	GTPBP8	47	902	45	0	127	79	284	269
NM_017654.3	NP_060124.2	SAMD9	270	5040	34	1	127	83	1589	7
NM_018237.3	NP_060707.2	CCAR1	189	3642	32	2	127	90	1150	81
NM_018997.3	NP_061870.1	MRPS21	525	789	36	0	127	70	87	75
NM_020445.5	NP_065178.1	ACTR3B	134	1391	98	2	127	74	418	11
NM_020715.2	NP_065766.1	PLEKHH1	142	4237	126	0	127	127	1364	1322
NM_022336.3	NP_071731.1	EDAR	431	1778	7	1	127	65	448	17
NM_022367.3	NP_071762.2	SEMA4A	263	2549	114	0	127	56	761	723
NM_024745.4	NP_079021.3	SHCBP1	40	2059	45	0	127	113	672	657
NM_025135.4	NP_079411.2	FHOD3	140	4460	169	1	127	63	1439	43
NM_030769.2	NP_110396.1	NPL	428	1391	54	0	127	104	320	302
NM_030938.4	NP_112200.2	VMP1	310	1531	10	1	127	73	406	9
NM_032182.3	NP_115558.3	ABRAXAS2, FAM175B	45	1293	205	1	127	51	415	6
NM_032423.2	NP_115799.2	ZNF528	426	2313	30	0	127	49	628	618
NM_033286.3	NP_150628.3	KNSTRN	115	1066	47	2	127	109	316	13
NM_033312.2	NP_201569.1	CDC14A	488	2360	42	0	127	47	623	609
NM_080881.2	NP_543157.1	DBN1	282	2238	14	2	127	122	651	31
NM_138355.3	NP_612364.2	SCRN2	126	1404	26	2	127	87	425	53
NM_148901.1	NP_683699.1	TNFRSF18	138	906	18	0	127	94	255	249
NM_175741.2	NP_786883.1	NUTM1	551	3950	10	1	127	69	1132	10
NM_178009.4	NP_821077.1	DGKH	66	3729	286	1	127	112	1220	7
NM_181507.1	NP_852608.1	HPS5	278	3668	37	1	127	112	1129	22
NM_182969.2	NP_892014.1	XRRA1	332	2711	28	1	127	41	792	6
NM_205855.3	NP_995327.1	FAM180A	266	788	12	0	127	102	173	169
NM_207408.1	NP_997291.1	TEX43	13	418	58	1	127	69	134	20
NM_000080.3	NP_000071.1	CHRNE	11	1493	103	1	128	104	493	22
NM_000311.4	NP_000302.1	PRNP	429	1191	21	0	128	32	253	246
NM_000320.2	NP_000311.2	QDPR	180	915	74	2	128	69	244	15
NM_000993.4	NP_000984.1	RPL31	87	465	100	1	128	76	125	20
NM_001025071.1	NP_001020242.1	RPS14	273	729	76	1	128	98	151	30
NM_001127222.1	NP_001120694.1	CACNA1A	236	7757	21	0	128	79	2506	2499
NM_001136.4	NP_001127.1	AGER	100	1315	149	2	128	79	404	43
NM_001198568.1	NP_001185497.1	ADCY4	419	3653	287	2	128	93	1077	162
NM_001269041.1	NP_001255970.1	CTCFL	662	2654	63	0	128	43	663	642
NM_001316980.1	NP_001303909.1	ZBTB45	91	1627	70	1	128	103	511	11
NM_001827.2	NP_001818.1	CKS2	98	338	61	1	128	92	79	16
NM_002357.3	NP_002348.1	MXD1	290	956	18	0	128	60	221	215
NM_002375.4	NP_002366.2	MAP4	526	3985	22	1	128	81	1152	2
NM_003810.3	NP_003801.1	TNFSF10	123	969	6	0	128	88	281	279
NM_004484.3	NP_004475.1	GPC3	197	1940	39	0	128	92	580	567
NM_005051.2	NP_005042.1	QARS1, QARS	396	2724	169	1	128	64	775	16
NM_006366.2	NP_006357.1	CAP2	243	1677	9	0	128	116	477	474
NM_006417.4	NP_006408.3	IFI44	124	1459	23	2	128	72	444	16
NM_006667.4	NP_006658.1	PGRMC1	119	707	13	1	128	89	195	95
NM_012115.3	NP_036247.1	CASP8AP2	235	6184	10	1	128	66	1982	58
NM_014547.4	NP_055362.1	TMOD3	283	1342	46	1	128	65	352	13
NM_015409.4	NP_056224.3	EP400	152	9524	7	1	128	102	3123	58
NM_017646.5	NP_060116.2	TRIT1	20	1424	168	0	128	77	467	411
NM_018025.2	NP_060495.2	GPATCH1	314	3110	43	1	128	111	931	90
NM_018096.4	NP_060566.2	NLE1	40	1498	37	1	128	83	485	5
NM_019591.3	NP_062537.2	ZNF26	493	2095	60	0	128	59	533	513
NM_020525.4	NP_065386.1	IL22	53	593	36	0	128	83	179	167
NM_020987.4	NP_066267.2	ANK3	446	13580	7	1	128	65	4377	5
NM_024667.2	NP_078943.1	VPS37B	103	961	90	0	128	90	285	255
NM_030751.5	NP_110378.3	ZEB1	63	3438	7	1	128	79	1124	24
NM_031273.2	NP_112563.1	TEX13B	93	1032	72	0	128	119	312	288
NM_031274.4	NP_112564.1	TEX13A	131	1361	72	0	128	119	409	385
NM_032350.5	NP_115726.1	C7orf50	70	655	323	2	128	94	194	23
NM_053002.5	NP_443728.3	MED12L	129	6567	25	1	128	96	2145	5
NM_138349.3	NP_612358.3	TP53I13	115	1297	75	0	128	120	393	368
NM_138809.3	NP_620164.1	CMBL	451	1189	52	1	128	82	245	3
NM_139276.2	NP_644805.1	STAT3	240	2553	8	2	128	70	770	7
NM_144664.4	NP_653265.3	FAM76B	312	1332	89	2	128	84	339	23
NM_145201.5	NP_660202.3	NAPRT	33	1650	72	0	128	94	538	514
NM_145702.2	NP_663748.1	TIGD1	708	2484	66	0	128	106	591	569
NM_174891.3	NP_777551.2	CLBA1, C14orf79	153	1131	97	1	128	89	325	98
NM_174901.5	NP_777561.1	FAM9C	327	828	33	0	128	115	166	155
NM_203418.2	NP_981963.1	RCAN1	261	855	115	1	128	75	197	17
NM_203474.1	NP_982300.1	PORCN	37	1405	157	1	128	108	455	62
NM_001017437.3	NP_001017437.2	CCDC157	663	2922	30	0	129	47	752	742
NM_001033002.3	NP_001028174.2	RPAIN	570	1230	83	2	129	66	219	84
NM_001045477.2	NP_001038942.1	NUTM2G	21	1500	10	1	129	72	492	10
NM_001079669.3	NP_001073137.1	TMTC4	246	2472	112	1	129	115	741	37
NM_001080500.3	NP_001073969.1	VWC2L	299	968	16	1	129	61	222	37
NM_001128210.1	NP_001121682.1	SPRED2	191	1439	51	0	129	92	415	398
NM_001129891.2	NP_001123363.1	INSYN2B, FAM196B	1399	3007	15	0	129	84	535	530
NM_001130067.1	NP_001123539.1	TRIM2	201	2436	74	2	129	31	744	73
NM_001143909.1	NP_001137381.1	RPEL1	110	797	75	0	129	80	228	203
NM_001163809.1	NP_001157281.1	WDR81	129	5955	78	0	129	102	1941	1915
NM_001174156.1	NP_001167627.1	SAMD8	103	1351	46	1	129	101	415	1
NM_001242546.1	NP_001229475.1	ANAPC16	492	825	132	0	129	103	110	66
NM_001282382.1	NP_001269311.1	PTTG1	403	1012	16	1	129	60	202	18
NM_001282695.1	NP_001269624.1	FAM107B	825	1221	25	1	129	101	131	11
NM_001318890.1	NP_001305819.1	ACSM1	204	1938	12	0	129	61	577	573
NM_001318917.1	NP_001305846.1	LOC645188	78	534	61	1	129	104	151	5
NM_001928.3	NP_001919.2	CFD	31	793	117	0	129	96	253	214
NM_002618.3	NP_002609.1	PEX13	83	1295	117	0	129	63	403	364
NM_002921.3	NP_002912.2	RGR	38	926	60	0	129	84	295	275
NM_002960.1	NP_002951.1	S100A3	83	389	155	2	129	90	101	1
NM_002983.2	NP_002974.1	CCL3	102	381	42	0	129	102	92	78
NM_003005.3	NP_002996.2	SELP	65	2558	122	2	129	76	830	16
NM_003363.3	NP_003354.2	USP4	79	2971	34	1	129	56	963	11
NM_003804.4	NP_003795.2	RIPK1	232	2248	12	0	129	83	671	667
NM_003979.3	NP_003970.1	GPRC5A	650	1724	19	1	129	65	357	6
NM_003998.3	NP_003989.2	NFKB1	467	3377	10	1	129	99	969	17
NM_005125.1	NP_005116.1	CCS	43	868	57	0	129	95	274	255
NM_005641.3	NP_005632.1	TAF6	552	2586	54	0	129	57	677	659
NM_005659.6	NP_005650.2	UFD1, UFD1L	130	1054	15	0	129	115	307	302
NM_005804.3	NP_005795.2	DDX39A	118	1402	13	1	129	84	427	46
NM_005859.4	NP_005850.1	PURA	59	1028	309	0	129	86	322	219
NM_006177.3	NP_006168.1	NRL	131	845	27	0	129	73	237	228
NM_006666.2	NP_006657.1	RUVBL2	464	1856	43	1	129	101	463	1
NM_007144.2	NP_009075.1	PCGF2	243	1278	48	0	129	84	344	328
NM_013233.2	NP_037365.2	STK39	160	1798	242	2	129	68	545	23
NM_015436.3	NP_056251.2	RCHY1	144	930	22	1	129	113	261	21
NM_016516.2	NP_057600.2	VPS54	163	3097	49	1	129	101	977	5
NM_017561.1	NP_060031.1	NUTM2F	21	2292	10	1	129	72	756	10
NM_017938.3	NP_060408.3	TMEM255A	227	1277	36	0	129	80	349	337
NM_019074.3	NP_061947.1	DLL4	336	2394	409	1	129	90	685	12
NM_020422.5	NP_065155.3	TMEM159	575	1061	108	0	129	60	161	125
NM_024082.3	NP_076987.3	PRRG3	49	745	25	1	129	70	231	5
NM_024662.2	NP_078938.2	NAT10	244	3322	46	1	129	88	1025	2
NM_030933.3	NP_112195.2	SHCBP1L	392	2354	295	1	129	93	653	15
NM_031296.2	NP_112586.1	RAB33B	389	1079	12	0	129	83	229	225
NM_033063.1	NP_149052.1	MAP6	65	2507	229	1	129	34	813	43
NM_147175.3	NP_671704.3	HS6ST2	416	2234	291	0	129	61	605	508
NM_152278.4	NP_689491.1	TCEAL7	264	567	73	1	129	62	100	27
NM_152513.3	NP_689726.3	MEI1	25	3850	192	0	129	78	1274	1210
NM_152769.2	NP_689982.3	CBARP	257	1619	18	0	129	94	453	447
NM_175609.2	NP_783202.1	ARFGAP1	140	1385	49	1	129	90	414	18
NM_199229.2	NP_954699.1	RPE	97	784	75	0	129	56	228	203
NM_000713.2	NP_000704.1	BLVRB	130	751	160	1	130	92	206	32
NM_001080826.2	NP_001074295.2	PRAG1, SGK223	87	4308	39	0	130	89	1406	1393
NM_001143766.1	NP_001137238.1	ZNF438	483	2970	31	1	130	90	828	35
NM_002435.2	NP_002426.1	MPI	63	1335	46	1	130	88	423	55
NM_004929.3	NP_004920.1	CALB1	184	970	171	0	130	82	261	204
NM_005872.2	NP_005863.1	BCAS2	53	731	40	1	130	27	225	36
NM_006601.6	NP_006592.3	PTGES3	409	892	40	1	130	81	160	15
NM_012151.3	NP_036283.2	F8A1	15	1131	618	0	130	68	371	165
NM_016627.4	NP_057711.3	AMZ2	702	1785	76	1	130	84	360	3
NM_000721.3	NP_000712.2	CACNA1E	195	7008	46	1	131	73	2270	78
NM_001011713.2	NP_001011713.2	NAA30	154	1243	433	1	131	101	362	46
NM_001025105.2	NP_001020276.1	CSNK1A1	588	1686	235	1	131	69	365	9
NM_001031735.2	NP_001026905.2	IZUMO4	77	722	103	1	131	76	214	1
NM_001098844.2	NP_001092314.1	TMEM236	35	1091	169	1	131	61	351	3
NM_001134396.1	NP_001127868.1	C7orf50	41	626	323	2	131	94	194	23
NM_001173467.2	NP_001166938.1	SP7	285	1581	34	1	131	123	431	8
NM_001320808.1	NP_001307737.1	LPGAT1	816	1929	57	0	131	76	370	351
NM_001322374.1	NP_001309303.1	CEBPZOS	61	304	99	0	131	128	80	47
NM_001822.5	NP_001813.1	CHN1	341	1721	25	1	131	84	459	44
NM_002970.3	NP_002961.1	SAT1	194	710	79	1	131	91	171	7
NM_003784.3	NP_003775.1	SERPINB7	360	1503	22	1	131	76	380	25
NM_004296.6	NP_004287.3	RGS6	285	1704	66	0	131	106	472	450
NM_005964.3	NP_005955.3	MYH10	139	6070	127	1	131	66	1976	36
NM_006084.4	NP_006075.3	IRF9	127	1309	91	1	131	83	393	241
NM_012110.3	NP_036242.1	CHIC2	348	846	22	1	131	55	165	35
NM_017528.4	NP_059998.2	BUD23, WBSCR22	58	904	28	1	131	115	281	22
NM_018296.5	NP_060766.5	LRRC36	19	2284	11	2	131	100	754	39
NM_018394.3	NP_060864.1	ABHD10	186	1107	261	0	131	36	306	219
NM_020395.3	NP_065128.2	INTS12	258	1647	106	1	131	55	462	56
NM_021639.4	NP_067652.1	GPBP1L1	1361	2786	10	1	131	88	474	7
NM_022913.3	NP_075064.1	GPBP1	1274	2696	10	1	131	98	473	20
NM_024013.2	NP_076918.1	IFNA1	54	624	24	0	131	60	189	181
NM_025029.4	NP_079305.2	MZT2B	361	838	111	0	131	83	158	121
NM_025211.3	NP_079487.2	GKAP1	496	1597	154	1	131	86	366	69
NM_032329.5	NP_115705.2	ING5	47	770	12	0	131	90	240	236
NM_032900.5	NP_116289.4	ARHGAP19	46	1531	58	1	131	66	494	6
NM_147196.2	NP_671729.2	TMIE	155	626	159	0	131	76	156	103
NM_152401.2	NP_689614.2	PDCL2	103	829	13	1	131	86	241	9
NM_152434.2	NP_689647.2	CWF19L2	30	2715	12	0	131	127	894	890
NM_173694.4	NP_775965.2	ATP11C	99	3498	6	0	131	72	1132	1130
NM_183050.3	NP_898871.1	BCKDHB	84	1263	130	1	131	85	392	27
NM_201515.1	NP_958923.1	PPHLN1	127	1252	21	0	131	84	374	367
NM_213598.3	NP_998763.2	ZNF543	357	2160	37	1	131	89	600	3
NM_000605.3	NP_000596.2	IFNA2	68	635	114	0	132	49	188	150
NM_001001563.3	NP_001001563.1	TIMM50	133	1504	103	1	132	99	456	15
NM_001317998.1	NP_001304927.1	ZNF677	378	2133	34	1	132	81	584	3
NM_001347.3	NP_001338.2	DGKQ	78	2907	282	0	132	53	942	848
NM_002170.3	NP_002161.2	IFNA8	30	600	129	0	132	84	189	146
NM_015252.3	NP_056067.2	EHBP1	482	4178	40	1	132	112	1231	28
NM_019116.2	NP_061989.2	UBFD1	202	1132	22	1	132	97	309	80
NM_021970.3	NP_068805.1	LAMTOR3	249	624	7	1	132	59	124	2
NM_024518.2	NP_078794.1	ULBP3	81	816	136	1	132	96	244	32
NM_025218.3	NP_079494.1	ULBP1	76	811	77	2	132	104	244	9
NM_133328.3	NP_579874.1	DEDD2	199	1180	43	1	132	91	326	22
NM_170725.2	NP_733843.1	PGBD2	147	1926	19	1	132	78	592	11
NM_206915.2	NP_996798.1	BEX3	399	735	30	0	132	79	111	101
NM_016491.3	NP_057575.2	MRPL37	77	1349	91	1	133	50	423	86
NM_080866.2	NP_543142.2	SLC22A9	268	1930	105	0	133	16	553	518
NM_152446.3	NP_689659.2	CEP128	171	3456	56	2	133	79	1094	50
NM_198207.2	NP_937850.1	CERS1	72	1086	45	0	133	62	337	322
NM_001002759.1	NP_001002759.1	SFR1	13	751	39	0	134	87	245	232
NM_001080851.1	NP_001074320.1	DMRTC1B	94	673	81	0	134	100	192	165
NM_001098801.1	NP_001092271.1	FAM210A	432	1251	5	2	134	70	272	19
NM_001113523.2	NP_001106995.1	PARP15	66	2103	66	0	134	73	678	656
NM_002427.3	NP_002418.1	MMP13	29	1445	79	1	134	84	471	16
NM_003891.2	NP_003882.1	PROZ	7	1210	170	2	134	87	400	2
NM_014361.3	NP_055176.1	CNTN5	504	3807	21	0	134	65	1100	1093
NM_017554.2	NP_060024.2	PARP14	59	5465	84	0	134	84	1801	1773
NM_018208.3	NP_060678.2	ETNK2	330	1491	77	2	134	93	386	100
NM_020923.2	NP_065974.1	ZDBF2	408	7473	113	2	134	108	2354	3
NM_020933.4	NP_065984.3	ZNF317	305	2093	181	1	134	87	595	24
NM_031215.2	NP_112492.2	CABLES2	7	1444	346	1	134	71	478	42
NM_032324.2	NP_115700.1	NTPCR	180	753	100	1	134	40	190	14
NM_033053.2	NP_149042.2	DMRTC1	94	673	81	0	134	100	192	165
NM_130849.3	NP_570901.2	SLC39A4	106	2050	364	1	134	65	647	14
NM_134428.2	NP_602304.1	RFX3	330	2580	151	1	134	88	749	52
NM_145051.3	NP_659488.2	RNF183	118	697	84	0	134	108	192	164
NM_181719.5	NP_859070.3	TMCO4	346	2251	6	0	134	94	634	632
NM_001142725.1	NP_001136197.1	ERI2	43	2119	64	1	135	64	691	15
NM_001202429.1	NP_001189358.1	ASB2	370	2278	82	1	135	107	635	11
NM_002116.7	NP_002107.3	HLA-A	84	1182	9	0	135	111	365	362
NM_003977.3	NP_003968.3	AIP	130	1123	88	1	135	104	330	125
NM_014988.4	NP_055803.2	LIMCH1	210	3462	148	1	135	77	1083	8
NM_015090.3	NP_055905.2	NFASC	328	3838	31	1	135	58	1169	20
NM_018139.2	NP_060609.2	DNAAF2	81	2595	102	0	135	61	837	803
NM_021114.3	NP_066937.1	SPINK2	207	462	128	2	135	90	84	5
NM_172127.2	NP_742125.1	CAMK2D	859	2296	89	2	135	106	478	22
NM_173560.3	NP_775831.2	RFX6	63	2850	225	0	135	112	928	853
NM_000075.3	NP_000066.1	CDK4	292	1204	16	1	136	81	303	31
NM_001048200.2	NP_001041665.1	HIPK3	570	4155	31	1	136	67	1194	12
NM_006754.3	NP_006745.1	SYPL1	118	898	54	0	136	87	259	241
NM_018116.3	NP_060586.2	MSTO1	79	1792	85	1	136	104	570	43
NM_000334.4	NP_000325.4	SCN4A	77	5588	132	0	137	65	1836	1792
NM_001656.3	NP_001647.1	TRIM23	86	1811	106	1	137	83	574	42
NM_002666.4	NP_002657.3	PLIN1	181	1750	31	1	137	43	522	19
NM_004220.2	NP_004211.1	ZNF213	447	1827	103	1	137	80	459	59
NM_006322.5	NP_006313.1	TUBGCP3	205	2929	79	1	137	72	907	1
NM_024923.3	NP_079199.2	NUP210	93	5757	328	1	137	61	1887	27
NM_178026.2	NP_821158.2	GGT7	43	2032	63	0	137	65	662	641
NM_000954.5	NP_000945.3	PTGDS	75	648	24	0	138	53	190	182
NM_005360.4	NP_005351.2	MAF	823	2035	18	0	138	86	403	397
NM_005456.3	NP_005447.1	MAPK8IP1	325	2461	109	1	138	100	711	59
NM_006816.2	NP_006807.1	LMAN2	237	1308	213	0	138	52	356	285
NM_015147.2	NP_055962.2	CEP68	214	2488	61	1	138	69	757	16
NM_006197.3	NP_006188.3	PCM1	422	6497	28	1	139	118	2024	2
NM_016027.2	NP_057111.1	LACTB2	92	959	75	0	139	82	288	263
NM_001261434.1	NP_001248363.1	AARSD1	58	1297	28	1	140	66	412	28
NM_001144064.2	NP_001137536.1	CXorf51A	8	335	34	1	141	85	108	34
NM_001244892.1	NP_001231821.1	CXorf51B	8	335	34	1	141	85	108	34
NM_001278163.1	NP_001265092.1	HIPK3	83	3668	31	1	141	67	1194	12
NM_012477.3	NP_036609.1	WBP1	203	1013	160	1	141	81	269	95
NM_014824.2	NP_055639.2	FCHSD2	221	2444	63	0	141	97	740	719
NM_025160.6	NP_079436.4	WDR26	194	2180	10	1	141	97	661	70
NM_031291.3	NP_112581.1	SLC25A31	168	1116	195	0	141	66	315	250
NM_000356.3	NP_000347.2	TCOF1	108	4344	67	1	142	85	1411	7
NM_000607.2	NP_000598.2	ORM1	111	717	292	1	142	71	201	22
NM_000608.2	NP_000599.1	ORM2	116	722	292	1	142	71	201	30
NM_017846.4	NP_060316.1	TRNAU1AP	94	958	18	0	142	53	287	281
NM_018969.5	NP_061842.1	GPR173	258	1380	67	1	142	49	373	1
NM_198268.2	NP_938009.1	HIPK1	161	3794	94	1	142	93	1210	30
NM_015965.6	NP_057049.5	NDUFA13	29	464	27	0	149	76	144	135
