# Supplementary material for: Translation initiation downstream from annotated start codons in human mRNAs coevolves with the Kozak context
Source: Genome Res. 2020 Jul;30(7):974–84. doi: 10.1101/gr.257352.119 (PMC7397870; doi:10.1101/gr.257352.119)
Supplement: Supplemental Material [file supp_gr.257352.119_Supplemental_Table_S2.xlsx]

## Sheet: Supplemental_Table_S2
Supplemental Table S2. “Weak” set. Constituted by 10% of the mRNAs with the lowest translation initiation context efficiency values.
* 0-based coordinates in mRNA sequence ** From CDS_start (0-based)
mRNA_ID	protein_ID	Gene_symbols	CDS_start *	CDS_end *	fdAUG_start **	fdAUG_frame	sAUG_TIE	fdAUG_TIE	sAUG_ORF_length_aa	fdAUG_ORF_length_aa
NM_016308.2	NP_057392.1	CMPK1	149	836	96	0	16	59	228	196
NM_015423.2	NP_056238.2	AASDHPPT	146	1076	39	0	18	64	309	296
NM_016125.3	NP_057209.3	RNFT1	93	1401	49	1	21	82	435	18
NM_006022.3	NP_006013.1	TSC22D1	296	731	11	2	22	72	144	2
NM_025107.2	NP_079383.2	MYCT1	8	716	16	1	22	37	235	50
NM_153809.2	NP_722516.1	TAF1L	90	5571	57	0	22	91	1826	1807
NM_001289121.1	NP_001276050.1	ZCCHC7	318	1950	3	0	23	112	543	542
NM_012455.2	NP_036587.2	PSD4	183	3354	3	0	23	97	1056	1055
NM_207385.1	NP_997268.1	ZFHX3, C16orf47	188	590	286	1	23	50	133	28
NM_001004751.2	NP_001004751.1	OR51D1	76	1051	43	1	24	72	324	41
NM_001159767.1	NP_001153239.1	BZW2	178	1438	58	1	24	74	419	28
NM_001302819.1	NP_001289748.1	C22orf24	187	871	43	1	24	28	227	20
NM_005074.3	NP_005065.2	SLC17A1	116	1520	6	0	24	81	467	465
NM_172004.3	NP_742001.1	CLECL1	35	539	19	1	24	73	167	11
NM_000942.4	NP_000933.1	PPIB	169	820	24	0	26	93	216	208
NM_001207059.1	NP_001193988.1	INTS14, VWA9	141	1527	17	2	27	27	461	15
NM_001301196.1	NP_001288125.1	TRIB3	206	1283	64	1	27	48	358	3
NM_002525.2	NP_002516.2	NRDC	322	3982	147	0	27	74	1219	1170
NM_014015.3	NP_054734.2	DEXI	395	683	81	0	27	63	95	68
NM_014458.3	NP_055273.2	KLHL20	179	2009	15	0	27	67	609	604
NM_032133.4	NP_115509.4	MYCBPAP	162	3117	111	0	27	30	984	947
NM_152723.2	NP_689936.1	CCDC89	147	1272	12	0	27	59	374	370
NM_178496.3	NP_848591.2	MB21D2	321	1797	6	0	27	129	491	489
NM_001173990.2	NP_001167461.1	TMEM216	272	710	21	0	28	125	145	138
NM_014326.3	NP_055141.2	DAPK2	31	1144	15	0	28	89	370	365
NM_015411.2	NP_056226.2	SUMF2	31	994	10	1	28	51	320	15
NM_018287.6	NP_060757.4	ARHGAP12	304	2845	6	0	28	128	846	844
NM_174938.5	NP_777598.3	FRMD3	202	1996	42	0	28	91	597	583
NM_207454.2	NP_997337.2	C17orf102	89	593	45	0	28	95	167	152
NM_001207067.1	NP_001193996.1	BZW1	455	1715	64	1	29	85	419	18
NM_001291913.2	NP_001278842.1	LOC389602	198	1095	58	1	29	65	298	24
NM_006330.3	NP_006321.1	LYPLA1	194	887	15	0	29	80	230	225
NM_152569.2	NP_689782.2	DOCK8-AS1, C9orf66	497	1385	270	0	29	73	295	205
NM_153027.1	NP_694572.1	FAM218A	75	549	8	2	29	78	157	40
NM_178547.3	NP_848642.1	ZBTB8OS	25	565	36	0	29	118	179	167
NM_181877.3	NP_870992.2	ZSCAN2	226	2071	3	0	29	107	614	613
NM_001080448.2	NP_001073917.2	EPHA6	43	3436	282	0	30	97	1130	1036
NM_001303241.1	NP_001290170.1	CNOT6	458	2132	39	0	30	97	557	544
NM_007260.2	NP_009191.1	LYPLA2	121	817	15	0	30	79	231	226
NM_032378.5	NP_115754.3	EEF1D	459	2403	58	1	30	88	647	29
NM_000720.3	NP_000711.1	CACNA1D	118	6664	3	0	31	88	2181	2180
NM_000941.2	NP_000932.3	POR	82	2125	9	0	31	99	680	677
NM_001080504.2	NP_001073973.2	RBM44	132	3291	3	0	31	113	1052	1051
NM_001099857.2	NP_001093327.1	IKBKG	414	1674	36	0	31	79	419	407
NM_001256346.1	NP_001243275.1	SEMA5B	527	3983	86	2	31	45	1151	22
NM_001257097.1	NP_001244026.1	RHNO1	289	1006	364	1	31	83	238	6
NM_002651.3	NP_002642.1	PI4KB	639	3126	36	0	31	99	828	816
NM_022118.4	NP_071401.3	RBM26	447	3390	12	0	31	106	980	976
NM_024630.2	NP_078906.2	ZDHHC14	497	1964	24	0	31	67	488	480
NM_173629.2	NP_775900.1	DYNAP	46	679	22	1	31	82	210	28
NM_181718.3	NP_859069.2	ASPHD1	146	1319	72	0	31	88	390	366
NM_006509.3	NP_006500.2	RELB	131	1871	51	0	32	64	579	562
NM_018449.3	NP_060919.3	UBAP2	113	3473	3	0	32	102	1119	1118
NM_030824.2	NP_110451.1	ZNF442	611	2495	58	1	32	81	627	9
NM_145805.2	NP_665804.1	ISL2	160	1240	39	0	32	100	359	346
NM_172366.3	NP_758954.1	FBXO16	149	1028	3	0	32	124	292	291
NM_002314.3	NP_002305.1	LIMK1	214	2158	42	0	33	72	647	633
NM_002388.4	NP_002379.3	MCM3	72	2634	135	0	33	126	853	808
NM_004479.3	NP_004470.1	FUT7	849	1878	7	1	33	106	342	75
NM_015189.2	NP_056004.1	EXOC6B	132	2568	15	0	33	117	811	806
NM_144988.3	NP_659425.1	ALG14	53	704	65	2	33	100	216	28
NM_213606.3	NP_998771.3	SLC16A12	301	1852	90	0	33	93	516	486
NM_001114734.1	NP_001108206.2	PABPC4L	83	1370	174	0	34	87	428	370
NM_001291291.1	NP_001278220.1	LOC113230	301	961	192	0	34	98	219	155
NM_003632.2	NP_003623.1	CNTNAP1	216	4371	3	0	34	134	1384	1383
NM_014868.4	NP_055683.3	RNF10	483	2919	42	0	34	70	811	797
NM_138737.4	NP_620074.3	HEPH	179	3818	37	1	34	57	1212	38
NM_173591.3	NP_775862.3	OTOGL	6	7041	28	1	34	67	2344	16
NM_201269.2	NP_958357.1	ZNF644	283	4267	22	1	34	115	1327	8
NM_213597.3	NP_998762.1	KRBA2	6	1485	80	2	34	48	492	16
NM_214461.2	NP_999626.1	CDRT15P3, C2orf27B	493	1123	222	0	34	108	209	135
NM_001018071.3	NP_001018081.3	FRMPD2	331	4261	27	0	35	79	1309	1300
NM_001134734.1	NP_001128206.1	C1orf94	838	2635	69	0	35	135	598	575
NM_001145210.2	NP_001138682.1	ANKRD65	312	1512	60	0	35	31	399	379
NM_001978.4	NP_001969.2	DMTN	523	1741	99	0	35	80	405	372
NM_003920.4	NP_003911.2	TIMELESS	217	3844	12	0	35	67	1208	1204
NM_017679.4	NP_060149.3	BCAS3	145	2887	4	1	35	46	913	35
NM_032160.2	NP_115536.1	DSEL	1224	4893	23	2	35	66	1222	24
NM_139159.4	NP_631898.3	DPP9	258	2937	87	0	35	127	892	863
NM_153040.2	NP_694585.1	C15orf32	472	1009	22	1	35	33	178	53
NM_153215.2	NP_694947.1	LSMEM2	87	582	36	0	35	75	164	152
NM_172231.3	NP_757386.2	SUGP1	16	1954	12	0	35	87	645	641
NM_207510.3	NP_997393.3	LCNL1	594	1089	19	1	35	86	164	11
NM_001135179.1	NP_001128651.1	ZDHHC3	274	1174	3	0	36	92	299	298
NM_001282062.1	NP_001268991.1	DOC2A	230	1433	24	0	36	58	400	392
NM_006310.3	NP_006301.3	NPEPPS	223	2983	132	0	36	62	919	875
NM_006658.4	NP_006649.2	PPP1R17	326	794	3	0	36	83	155	154
NM_007005.4	NP_008936.2	TLE4	1018	3340	21	0	36	110	773	766
NM_014424.4	NP_055239.1	HSPB7	827	1340	120	0	36	62	170	130
NM_014946.3	NP_055761.2	SPAST	221	2072	258	0	36	116	616	530
NM_020359.2	NP_065092.1	PLSCR2	389	1064	63	0	36	95	224	203
NM_145026.3	NP_659463.1	SPATS1	101	1004	12	0	36	58	300	296
NM_173493.2	NP_775764.2	PASD1	332	2654	6	0	36	92	773	771
NM_199334.3	NP_955366.1	THRA	575	1808	67	1	36	69	410	12
NM_001282880.1	NP_001269809.1	ZNF502	378	2013	9	0	37	102	544	541
NM_001303016.1	NP_001289945.1	MGC57346-CRHR1	649	1507	46	1	37	84	285	57
NM_001332.3	NP_001323.1	CTNND2	190	3868	42	0	37	76	1225	1211
NM_001939.2	NP_001930.2	DRP2	369	3243	9	0	37	49	957	954
NM_005585.4	NP_005576.3	SMAD6	923	2414	106	1	37	121	496	27
NM_005996.3	NP_005987.3	TBX3	964	3136	12	0	37	72	723	719
NM_014647.3	NP_055462.2	MARF1, KIAA0430	207	5436	3	0	37	87	1742	1741
NM_014839.4	NP_055654.2	PLPPR4	158	2450	35	2	37	83	763	1
NM_015921.2	NP_057005.1	CUTA	620	1091	60	0	37	119	156	136
NM_016519.5	NP_057603.1	AMBN	101	1445	30	0	37	101	447	437
NM_016585.4	NP_057669.1	THEG	43	1183	154	1	37	107	379	64
NM_020437.4	NP_065170.2	ASPHD2	397	1507	78	0	37	86	369	343
NM_021211.3	NP_067034.2	ZBED5	499	2581	58	1	37	89	693	5
NM_021828.4	NP_068600.4	HPSE2	73	1852	30	0	37	76	592	582
NM_032737.3	NP_116126.3	LMNB2	35	1898	60	0	37	94	620	600
NM_178508.4	NP_848603.2	SMIM29, C6orf1	573	1053	50	2	37	91	159	46
NM_001037317.1	NP_001032394.1	PLPPR5	222	1188	33	0	38	96	321	310
NM_001129827.1	NP_001123299.1	CACNA1C	313	6874	7	1	38	57	2186	27
NM_001270805.1	NP_001257734.1	SYT6	250	1528	87	0	38	98	425	396
NM_001717.3	NP_001708.3	BNC1	88	3073	90	0	38	128	994	964
NM_004556.2	NP_004547.2	NFKBIE	25	1528	417	0	38	89	500	361
NM_005413.3	NP_005404.1	SIX3	207	1206	234	0	38	58	332	254
NM_007217.3	NP_009148.2	PDCD10	398	1037	6	0	38	111	212	210
NM_015691.3	NP_056506.2	WWC3	198	3477	69	0	38	57	1092	1069
NM_016122.2	NP_057206.2	CEP83	586	2692	24	0	38	69	701	693
NM_017546.4	NP_060016.3	CNOT11	82	1615	180	0	38	86	510	450
NM_052896.4	NP_443128.2	CSMD2	29	10493	32	2	38	109	3487	26
NM_144613.4	NP_653214.2	COX6B2	183	450	7	1	38	40	88	123
NM_145663.2	NP_663696.1	DBF4B	213	2061	48	0	38	90	615	599
NM_153838.4	NP_722580.3	ADGRF4	266	2354	6	0	38	97	695	693
NM_205768.2	NP_991331.1	ZBTB18	173	1769	16	1	38	67	531	17
NM_207119.2	NP_997002.1	LRRC20	478	1033	12	0	38	107	184	180
NM_000503.5	NP_000494.2	EYA1	640	2419	6	0	39	110	592	590
NM_001010873.2	NP_001010873.1	TSPO2	301	814	78	0	39	78	170	144
NM_001039763.3	NP_001034852.3	TMEM232	135	2109	6	0	39	79	657	655
NM_001081.3	NP_001072.2	CUBN	52	10924	3	0	39	89	3623	3622
NM_001145474.3	NP_001138946.1	TEX38	102	723	36	0	39	76	206	194
NM_001173542.1	NP_001167013.1	BANP	191	1718	3	0	39	77	508	507
NM_015049.2	NP_055864.2	TRAK2	446	3191	16	1	39	114	914	13
NM_018917.3	NP_061740.2	PCDHGA4	83	2972	93	0	39	111	962	931
NM_022567.2	NP_072089.1	NYX	430	1876	15	0	39	97	481	476
NM_031954.4	NP_114160.1	KCTD10	282	1224	9	0	39	82	313	310
NM_130901.2	NP_570971.1	OTUD7A	388	3169	58	1	39	54	926	3
NM_139320.1	NP_647536.1	CHRFAM7A	566	1805	85	1	39	60	412	13
NM_152356.3	NP_689569.2	ZNF491	285	1599	72	0	39	102	437	413
NM_153638.3	NP_705902.2	PANK2	167	1880	369	0	39	77	570	447
NM_181552.3	NP_853530.2	CUX1	38	4556	40	1	39	61	1505	39
NM_181706.4	NP_859057.4	DNAJC24	116	566	3	0	39	107	149	148
NM_198445.3	NP_940847.1	RINL	413	1772	46	1	39	101	452	13
NM_001004434.2	NP_001004434.1	SLC30A2	242	1361	160	1	40	79	372	22
NM_001012756.2	NP_001012774.1	ZNF260	922	2161	9	0	40	106	412	409
NM_001025300.2	NP_001020471.2	RAB12	283	1018	174	0	40	73	244	186
NM_001034996.2	NP_001030168.1	RPL14	133	781	40	1	40	53	215	14
NM_001077268.1	NP_001070736.1	ZFYVE19	514	1930	225	0	40	72	471	396
NM_001144936.1	NP_001138408.1	C11orf95	19	2056	342	0	40	66	678	564
NM_001199659.2	NP_001186588.1	LETM2	232	1567	10	1	40	91	444	22
NM_001278587.1	NP_001265516.1	LOC100134391	96	987	16	1	40	82	296	26
NM_001317971.1	NP_001304900.1	LOC105375787	58	478	55	1	40	114	139	103
NM_001324371.1	NP_001311300.1	ACSM5	143	1883	8	2	40	111	579	47
NM_001502.3	NP_001493.2	GP2	190	1795	12	0	40	51	534	530
NM_005097.3	NP_005088.1	LGI1	336	2010	24	0	40	84	557	549
NM_014332.2	NP_055147.1	SMPX	231	498	6	0	40	90	88	86
NM_016552.3	NP_057636.2	ANKMY1	262	3088	27	0	40	92	941	932
NM_020864.1	NP_065915.1	NYAP2	175	2137	15	0	40	111	653	648
NM_080603.4	NP_542170.3	ZSWIM1	113	1571	87	0	40	103	485	456
NM_145648.3	NP_663623.1	SLC15A4	53	1787	243	0	40	79	577	496
NM_153714.2	NP_714925.2	C10orf67	66	624	3	0	40	122	185	184
NM_001031737.2	NP_001026907.2	CCDC78	106	1423	58	1	41	104	438	31
NM_001143823.2	NP_001137295.1	ZBTB14	494	1844	18	0	41	108	449	443
NM_001316331.1	NP_001303260.1	ABHD14A-ACY1	255	1752	54	0	41	85	498	480
NM_006526.2	NP_006517.1	ZNF217	271	3418	24	0	41	72	1048	1040
NM_020770.2	NP_065821.1	CGN	144	3756	18	0	41	105	1203	1197
NM_023948.4	NP_076438.1	MOSPD3	301	1009	253	1	41	80	235	1
NM_024646.2	NP_078922.1	ZYG11B	195	2430	27	0	41	78	744	735
NM_031212.3	NP_112489.3	SLC25A28	129	1224	225	0	41	73	364	289
NM_032024.4	NP_114413.1	LRMDA, C10orf11	215	812	289	1	41	67	198	18
NM_152450.2	NP_689663.2	FAM81A	187	1294	9	0	41	110	368	365
NM_153026.2	NP_694571.2	PRICKLE1	354	2850	12	0	41	76	831	827
NM_153034.3	NP_694579.1	ZNF488	227	1250	51	0	41	104	340	323
NM_182522.4	NP_872328.1	TAFA4, FAM19A4	493	916	15	0	41	81	140	135
NM_207117.3	NP_997000.2	SLC25A47	78	1005	305	2	41	79	308	14
NM_001136039.2	NP_001129511.1	NIF3L1	91	1225	81	0	42	56	377	350
NM_001142418.1	NP_001135890.1	MORF4L2	504	1371	84	0	42	121	288	260
NM_001242698.1	NP_001229627.1	LOC100130357	178	640	47	2	42	94	153	29
NM_001247.4	NP_001238.2	ENTPD6	213	1668	19	1	42	87	484	22
NM_001865.3	NP_001856.2	COX7A2	98	446	96	0	42	107	115	83
NM_015178.2	NP_055993.2	RHOBTB2	537	2721	12	0	42	70	727	723
NM_016607.3	NP_057691.1	ARMCX3	533	1673	111	0	42	96	379	342
NM_024731.3	NP_079007.2	KLHL36	155	2006	3	0	42	79	616	615
NM_032840.2	NP_116229.1	SPRYD3	87	1416	33	0	42	72	442	431
NM_138284.1	NP_612141.1	IL17D	108	717	411	0	42	66	202	65
NM_152784.3	NP_689997.3	CATSPERD	61	2458	6	0	42	80	798	796
NM_153703.4	NP_714914.2	PODN	168	2154	144	0	42	92	661	613
NM_174905.3	NP_777565.3	FAM98C	19	1069	67	1	42	66	349	44
NM_207407.2	NP_997290.2	TMPRSS11F	49	1366	3	0	42	126	438	437
NM_000673.4	NP_000664.2	ADH7	241	1402	36	0	43	97	386	374
NM_000923.5	NP_000914.2	PDE4C	239	2378	72	0	43	93	712	688
NM_001005181.2	NP_001005181.1	OR56B4	95	1055	25	1	43	83	319	11
NM_001048164.2	NP_001041629.1	SLC7A3	150	2010	66	0	43	114	619	597
NM_001560.2	NP_001551.1	IL13RA1	43	1327	146	2	43	66	427	13
NM_005905.5	NP_005896.1	SMAD9	343	1636	82	1	43	87	430	13
NM_015412.3	NP_056227.2	NEPRO	61	1765	3	0	43	123	567	566
NM_017686.3	NP_060156.1	GDAP2	299	1793	34	1	43	40	497	15
NM_017726.7	NP_060196.1	PPP1R14D	68	506	43	1	43	96	145	42
NM_017793.2	NP_060263.2	RPP25	851	1451	111	0	43	75	199	162
NM_019617.3	NP_062563.3	GKN1	63	663	42	0	43	103	199	185
NM_024052.4	NP_076957.3	GID4	168	1071	249	0	43	65	300	217
NM_031474.2	NP_113662.1	NRIP2	72	918	150	0	43	79	281	231
NM_032283.2	NP_115659.1	ZDHHC18	95	1262	255	0	43	67	388	303
NM_175918.3	NP_787114.2	CRIPAK	2960	4301	4	1	43	38	446	187
NM_207034.2	NP_996917.1	EDN3	386	1103	79	1	43	79	238	181
NM_001007253.3	NP_001007254.2	ERV3-1	594	2409	9	0	44	73	604	601
NM_001042522.2	NP_001035987.1	SPRED3	103	1336	24	0	44	111	410	402
NM_001077697.2	NP_001071165.2	TSPY3	46	973	123	0	44	89	308	267
NM_001085451.1	NP_001078920.1	LNP1	1280	1817	13	1	44	103	178	12
NM_001109977.2	NP_001103447.1	FAM160A1	605	3728	3	0	44	92	1040	1039
NM_001177479.1	NP_001170950.1	HDX	247	2320	55	1	44	84	690	4
NM_001282469.2	NP_001269398.1	TSPY10	46	973	123	0	44	89	308	267
NM_003308.4	NP_003299.2	TSPY1	46	973	123	0	44	89	308	267
NM_006192.4	NP_006183.2	PAX1	54	1659	173	2	44	51	534	76
NM_006266.3	NP_006257.1	RALGDS	96	2841	12	0	44	51	914	910
NM_007350.3	NP_031376.3	PHLDA1	35	1241	107	2	44	113	401	16
NM_012139.3	NP_036271.1	SERGEF	152	1529	73	1	44	109	458	17
NM_014479.3	NP_055294.1	ADAMDEC1	220	1633	39	0	44	74	470	457
NM_022573.2	NP_072095.2	TSPY2	46	973	123	0	44	89	308	267
NM_024116.3	NP_077021.1	TAF1D	243	1080	31	1	44	93	278	1
NM_024690.2	NP_078966.2	MUC16	204	43728	51	0	44	75	14507	14490
NM_033334.3	NP_201591.2	NR6A1	191	1634	112	1	44	99	480	87
NM_033516.5	NP_277051.3	TPD52L3	247	670	7	1	44	64	140	21
NM_138778.4	NP_620133.1	DPH7	158	1517	3	0	44	97	452	451
NM_182533.2	NP_872339.2	FAAP20	26	569	100	1	44	74	180	13
NM_182606.3	NP_872412.3	TMPRSS11A	121	1387	3	0	44	119	421	420
NM_213621.3	NP_998786.2	HTR3A	233	1784	18	0	44	88	516	510
NM_001010895.2	NP_001010895.1	ERCC6L2	388	2527	33	0	45	63	712	701
NM_001029875.2	NP_001025046.1	RGS7BP	678	1452	16	1	45	78	257	126
NM_001093.3	NP_001084.3	ACACB	9	7386	75	0	45	94	2458	2433
NM_001111035.2	NP_001104505.1	ACP5	325	1303	6	0	45	95	325	323
NM_001130518.1	NP_001123990.1	CSGALNACT1	1064	2663	3	0	45	97	532	531
NM_001199973.1	NP_001186902.1	RPL36A-HNRNPH2	46	511	22	1	45	73	154	51
NM_001204091.1	NP_001191020.1	RPS10	98	596	6	0	45	42	165	163
NM_001293171.2	NP_001280100.1	HOTS	2789	3245	3	0	45	80	151	150
NM_002033.3	NP_002024.1	FUT4	283	1876	304	1	45	73	530	59
NM_003927.4	NP_003918.1	MBD2	229	1465	447	0	45	78	411	262
NM_005329.2	NP_005320.2	HAS3	156	1818	85	1	45	57	553	1
NM_007009.2	NP_008940.2	ZPBP	70	1126	217	1	45	53	351	13
NM_015401.4	NP_056216.2	HDAC7	195	3171	19	1	45	89	991	4
NM_017984.4	NP_060454.3	ZCWPW1	377	2324	3	0	45	92	648	647
NM_019105.6	NP_061978.6	TNXB	202	12931	3	0	45	71	4242	4241
NM_020719.2	NP_065770.1	PRR12	12	6123	56	2	45	80	2036	9
NM_021029.5	NP_066357.2	RPL36A	46	475	22	1	45	73	142	51
NM_024519.3	NP_078795.2	RIPOR1, FAM65A	124	3784	3	0	45	91	1219	1218
NM_030759.4	NP_110386.2	NRBF2	224	1088	9	0	45	79	287	284
NM_030905.2	NP_112167.2	OR2J2	102	1041	3	0	45	97	312	311
NM_058237.1	NP_478144.1	PPP4R4	154	2776	27	0	45	69	873	864
NM_207317.2	NP_997200.1	ZNF474	383	1478	287	2	45	67	364	16
NM_000346.3	NP_000337.1	SOX9	372	1902	21	0	46	56	509	502
NM_001037671.3	NP_001032760.1	PLEKHG7, C12orf74	451	1024	190	1	46	81	190	4
NM_001080470.1	NP_001073939.1	ZNF697	114	1752	57	0	46	91	545	526
NM_001080497.2	NP_001073966.2	MEGF9	129	1938	4	1	46	87	602	7
NM_001137550.1	NP_001131022.1	LRRFIP1	64	1987	6	0	46	112	640	638
NM_001287349.1	NP_001274278.1	ZNF852	165	1758	28	1	46	40	530	26
NM_001729.3	NP_001720.1	BTC	361	898	94	1	46	83	178	80
NM_003400.3	NP_003391.1	XPO1	728	3944	12	0	46	105	1071	1067
NM_004097.2	NP_004088.2	EMX1	378	1251	99	0	46	115	290	257
NM_004992.3	NP_004983.1	MECP2	226	1687	12	0	46	93	486	482
NM_014389.2	NP_055204.3	PELP1	76	3619	150	0	46	113	1180	1130
NM_014621.2	NP_055436.2	HOXD4	249	1017	6	0	46	92	255	253
NM_016510.5	NP_057594.4	SCLY	107	1469	24	0	46	86	453	445
NM_017895.7	NP_060365.7	DDX27	61	2452	93	0	46	104	796	765
NM_022823.2	NP_073734.1	FNDC4	406	1111	11	2	46	46	234	33
NM_024669.2	NP_078945.2	ANKRD55	152	1997	3	0	46	76	614	613
NM_031303.2	NP_112593.2	KATNAL2	194	1595	7	1	46	74	466	6
NM_033029.3	NP_149018.2	LMLN	22	1990	24	0	46	124	655	647
NM_052958.3	NP_443190.2	C8orf34	640	2257	258	0	46	98	538	452
NM_139056.3	NP_620687.2	ADAMTS16	138	3813	20	2	46	108	1224	53
NM_144964.3	NP_659401.2	TRMT10B	79	1030	88	1	46	84	316	45
NM_153230.2	NP_694962.1	FBXO39	120	1449	144	0	46	76	442	394
NM_173793.4	NP_776154.3	C22orf39	433	862	111	0	46	110	142	105
NM_182562.2	NP_872368.2	FAM169B	250	829	82	1	46	30	192	11
NM_198486.3	NP_940888.3	RPL7L1	295	1063	27	0	46	103	255	246
NM_001039380.3	NP_001034469.2	ZNF22-AS1, C10orf25	51	420	257	2	47	106	122	39
NM_001134363.2	NP_001127835.2	RBM20	58	3742	18	0	47	87	1227	1221
NM_001178007.1	NP_001171478.1	BBS12	381	2514	6	0	47	119	710	708
NM_001316893.1	NP_001303822.1	PRH1-TAS2R14	335	866	31	1	47	70	176	81
NM_002188.2	NP_002179.2	IL13	14	455	42	0	47	109	146	132
NM_004844.4	NP_004835.2	SH3BP5	221	1589	90	0	47	79	455	425
NM_013365.4	NP_037497.1	GGA1	387	2307	12	0	47	70	639	635
NM_014598.3	NP_055413.1	SOCS7	121	1867	691	1	47	106	581	17
NM_014620.5	NP_055435.2	HOXC4	686	1481	6	0	47	99	264	262
NM_014728.3	NP_055543.2	FRMPD4	506	4475	4	1	47	60	1322	5
NM_015315.4	NP_056130.2	LARP1	24	3084	283	1	47	98	1019	10
NM_016400.3	NP_057484.3	HYPK	178	568	24	0	47	116	129	121
NM_016612.3	NP_057696.2	SLC25A37	208	1225	48	0	47	81	338	322
NM_017953.3	NP_060423.3	ZNHIT6	149	1562	19	1	47	92	470	11
NM_020204.2	NP_064589.2	LHX9	437	1631	57	0	47	99	397	378
NM_053276.3	NP_444506.2	VIT	302	2384	21	0	47	104	693	686
NM_145914.2	NP_666019.1	ZSCAN21	144	1566	3	0	47	110	473	472
NM_148978.2	NP_683879.1	PANK1	167	1289	13	1	47	115	373	40
NM_152590.3	NP_689803.2	LMNTD1	189	1356	75	0	47	106	388	363
NM_183419.3	NP_904355.1	RNF19A	393	2910	37	1	47	76	838	5
NM_197960.3	NP_932064.1	DPP8	232	2929	21	0	47	80	898	891
NM_001012333.2	NP_001012333.1	MDK	176	608	283	1	48	97	143	12
NM_001012959.1	NP_001012977.1	DISC1	53	2090	135	0	48	64	678	633
NM_001184766.1	NP_001171695.1	ODF2L	369	2145	16	1	48	53	591	33
NM_001265615.1	NP_001252544.1	FAM153B	112	1045	33	0	48	86	310	299
NM_003184.3	NP_003175.1	TAF2	270	3870	30	0	48	99	1199	1189
NM_005801.3	NP_005792.1	EIF1	164	506	43	1	48	68	113	18
NM_006717.2	NP_006708.2	SPIN1	315	1104	46	1	48	74	262	10
NM_007202.3	NP_009133.2	AKAP10	177	2166	66	0	48	76	662	640
NM_014942.4	NP_055757.3	ANKRD6	341	2510	13	1	48	98	722	11
NM_016077.4	NP_057161.1	PTRH2	228	768	21	0	48	64	179	172
NM_019096.4	NP_061969.3	GTPBP2	84	1893	193	1	48	84	602	7
NM_019892.5	NP_063945.2	INPP5E	403	2338	121	1	48	64	644	92
NM_022350.4	NP_071745.1	ERAP2	711	3594	18	0	48	89	960	954
NM_025052.4	NP_079328.3	MAP3K19	31	4018	9	0	48	38	1328	1325
NM_133452.2	NP_597709.2	RAVER1	80	2351	51	0	48	114	756	739
NM_145052.3	NP_659489.1	UPRT	196	1126	30	0	48	66	309	299
NM_152492.2	NP_689705.2	CCDC27	81	2052	132	0	48	82	656	612
NM_173663.4	NP_775934.3	FAM153A	254	1187	33	0	48	86	310	299
NM_178831.6	NP_849153.3	CASTOR3, GATS	249	741	32	2	48	75	163	45
NM_198075.3	NP_932341.1	LRRC56	505	2134	196	1	48	53	542	5
NM_001002762.2	NP_001002762.2	DNAJB12	150	1380	102	0	49	69	409	375
NM_001011709.2	NP_001011709.2	PNLIPRP3	101	1505	64	1	49	83	467	3
NM_001039783.1	NP_001034872.1	TXNRD3, TXNRD3NB	479	881	57	0	49	61	133	114
NM_001087.4	NP_001078.2	AAMP	123	1428	64	1	49	53	434	9
NM_001099667.1	NP_001093137.1	ARMS2	65	389	24	0	49	65	107	99
NM_001136194.1	NP_001129666.1	FASTKD2	425	2558	48	0	49	97	710	694
NM_001172690.1	NP_001166161.1	ZNF573	69	2067	60	0	49	88	665	645
NM_001193308.1	NP_001180237.1	SYTL1	197	1886	57	0	49	101	562	543
NM_001290258.1	NP_001277187.1	ASB15	292	2059	10	1	49	82	588	15
NM_001798.4	NP_001789.2	CDK2	240	1137	202	1	49	53	298	47
NM_002232.4	NP_002223.3	KCNA3	224	1952	156	0	49	92	575	523
NM_003305.2	NP_003296.1	TRPC3	75	2622	27	0	49	71	848	839
NM_004690.3	NP_004681.1	LATS1	548	3941	36	0	49	88	1130	1118
NM_004852.2	NP_004843.2	ONECUT2	32	1547	26	2	49	60	504	48
NM_005425.4	NP_005416.1	TNP2	41	458	255	0	49	79	138	53
NM_006166.3	NP_006157.1	NFYB	201	825	6	0	49	82	207	205
NM_006694.3	NP_006685.1	JTB	723	1164	140	2	49	91	146	17
NM_014757.4	NP_055572.1	MAML1	263	3314	21	0	49	88	1016	1009
NM_015279.1	NP_056094.1	TBC1D30	308	2594	44	2	49	70	761	38
NM_015550.3	NP_056365.1	OSBPL3	476	3140	3	0	49	93	887	886
NM_017906.2	NP_060376.2	PAK1IP1	31	1210	86	2	49	79	392	5
NM_017993.4	NP_060463.2	ENOX1	650	2582	7	1	49	46	643	17
NM_020834.2	NP_065885.2	HOMEZ	148	1801	72	0	49	72	550	526
NM_031939.3	NP_114145.2	MRO	294	1041	78	0	49	85	248	222
NM_032738.3	NP_116127.3	FCRLA	242	1373	51	0	49	94	376	359
NM_033112.3	NP_149103.1	RRP36	53	833	141	0	49	87	259	212
NM_153369.2	NP_699200.2	MFSD4B	422	1979	169	1	49	67	518	2
NM_153615.1	NP_705843.1	RGL4	1170	2592	88	1	49	87	473	58
NM_175911.3	NP_787107.1	OR2L13	499	1438	8	2	49	80	312	6
NM_181710.3	NP_859061.3	ZNRF4	77	1367	27	0	49	51	429	420
NM_182515.3	NP_872321.2	ZNF714	378	2046	4	1	49	61	555	1
NM_198493.2	NP_940895.1	ANKRD45	61	862	64	1	49	94	266	26
NM_198996.3	NP_945347.2	LIPI	26	1472	11	2	49	97	481	3
NM_207377.2	NP_997260.1	TOMM20L	32	491	237	0	49	78	152	73
NM_000079.3	NP_000070.1	CHRNA1	78	1452	67	1	50	88	457	34
NM_001002906.1	NP_001002906.1	XKRY2	663	1017	25	1	50	71	117	9
NM_001007531.2	NP_001007532.1	NKAPL	75	1284	98	2	50	86	402	15
NM_001008540.2	NP_001008540.1	CXCR4	296	1367	57	0	50	108	356	337
NM_001079872.1	NP_001073341.1	CUL4B	324	3012	73	1	50	63	895	16
NM_001085377.1	NP_001078846.1	MCC	416	3476	3	0	50	123	1019	1018
NM_001135721.1	NP_001129193.1	PIWIL2	509	3431	69	0	50	53	973	950
NM_001193621.1	NP_001180550.1	PINLYP	125	812	72	0	50	89	228	204
NM_001271969.1	NP_001258898.1	HSP90AB1	251	2426	19	1	50	75	724	36
NM_001278284.1	NP_001265213.1	ZNF3	445	1786	103	1	50	72	446	8
NM_001319.6	NP_001310.3	CSNK1G2	523	1771	51	0	50	87	415	398
NM_001930.3	NP_001921.1	DHPS	121	1231	199	1	50	54	369	2
NM_003849.3	NP_003840.2	SUCLG1	193	1234	39	0	50	77	346	333
NM_004316.3	NP_004307.2	ASCL1	571	1282	18	0	50	80	236	230
NM_004677.2	NP_004668.2	XKRY	663	1017	25	1	50	71	117	9
NM_004816.4	NP_004807.3	FAM189A2	420	1773	196	1	50	82	450	2
NM_005730.3	NP_005721.3	CTDSP2	529	1345	145	1	50	100	271	45
NM_015347.5	NP_056162.4	RIMBP2	351	3510	43	1	50	90	1052	78
NM_017567.4	NP_060037.3	NAGK	268	1441	138	0	50	114	390	344
NM_019113.3	NP_061986.1	FGF21	572	1202	154	1	50	90	209	31
NM_020792.4	NP_065843.3	NCEH1	138	1461	96	0	50	84	440	408
NM_024578.2	NP_078854.1	OCEL1	44	839	168	0	50	56	264	208
NM_024852.3	NP_079128.2	AGO3	345	2928	45	0	50	68	860	845
NM_031282.2	NP_112572.1	FCRL4	136	1684	89	2	50	62	515	63
NM_032266.3	NP_115642.3	C2orf16	51	6006	59	2	50	125	1984	14
NM_033421.3	NP_219489.1	SNX21	89	1211	27	0	50	106	373	364
NM_152605.3	NP_689818.2	ZNF781	742	1726	10	1	50	100	327	4
NM_177964.4	NP_808879.2	LYPD6B	401	1025	114	0	50	97	207	169
NM_001002914.2	NP_001002914.1	KCTD11	1054	1753	12	0	51	94	232	228
NM_001004106.2	NP_001004106.1	GRK6	160	1891	86	2	51	119	576	22
NM_001004352.2	NP_001004352.1	LOC100506422	341	767	84	0	51	43	141	113
NM_001007467.2	NP_001007468.1	SFI1	529	4258	69	0	51	73	1242	1219
NM_001040022.1	NP_001035111.1	SIRPA	360	1875	303	0	51	72	504	403
NM_001112808.2	NP_001106279.2	FPGT-TNNI3K	28	2878	39	0	51	108	949	936
NM_001142928.1	NP_001136400.1	LRRC61	668	1448	241	1	51	87	259	6
NM_001144825.1	NP_001138297.1	RUNDC3A	274	1615	27	0	51	100	446	437
NM_001166215.1	NP_001159687.1	S1PR5	187	1384	210	0	51	83	398	328
NM_001202559.1	NP_001189488.1	CHURC1-FNTB	54	1551	81	0	51	77	498	471
NM_001286400.1	NP_001273329.1	C14orf180	501	984	67	1	51	68	160	25
NM_003616.2	NP_003607.1	GEMIN2	22	865	33	0	51	93	280	269
NM_003838.4	NP_003829.3	FPGT	28	1852	39	0	51	108	607	594
NM_004709.2	NP_004700.1	SLITRK2, TMEM257	268	604	64	1	51	79	111	3
NM_005875.2	NP_005866.1	EIF1B	260	602	43	1	51	68	113	18
NM_006287.5	NP_006278.1	TFPI	308	1223	12	0	51	93	304	300
NM_014738.5	NP_055553.3	TMEM94	394	4465	216	0	51	78	1356	1284
NM_014755.2	NP_055570.1	SERTAD2	297	1242	31	1	51	45	314	35
NM_018039.2	NP_060509.2	KDM4D	832	2404	9	0	51	98	523	520
NM_018436.3	NP_060906.3	ALLC	161	1337	6	0	51	128	391	389
NM_020731.4	NP_065782.2	AHRR	44	2204	12	0	51	104	719	715
NM_024712.3	NP_078988.2	ELMO3	43	2365	159	0	51	103	773	720
NM_052967.2	NP_443199.1	MAS1L	54	1191	41	2	51	52	378	5
NM_144688.4	NP_653289.3	KASH5, CCDC155	205	1894	42	0	51	101	562	548
NM_145165.3	NP_660148.3	CHURC1	54	477	81	0	51	77	140	113
NM_152430.3	NP_689643.2	OR51E1	144	1101	3	0	51	90	318	317
NM_174931.3	NP_777591.3	GPATCH11	67	925	66	0	51	66	285	263
NM_182560.2	NP_872366.2	C14orf177	419	797	78	0	51	64	125	99
NM_207374.3	NP_997257.2	OR10W1	402	1320	76	1	51	22	305	2
NM_000161.2	NP_000152.1	GCH1	161	914	58	1	52	96	250	46
NM_001012241.1	NP_001012241.1	MSL1	341	1397	12	0	52	61	351	347
NM_001114938.2	NP_001108410.2	CCDC17	150	2019	51	0	52	69	622	605
NM_001128219.2	NP_001121691.1	VGLL4	459	1350	9	0	52	42	296	293
NM_001173488.1	NP_001166959.1	NKRF	653	2726	18	0	52	125	690	684
NM_001308269.1	NP_001295198.1	ZNF121	290	1463	16	1	52	84	390	58
NM_001323684.1	NP_001310613.1	NRSN2	639	1254	3	0	52	83	204	203
NM_002144.3	NP_002135.2	HOXB1	6	912	15	0	52	74	301	296
NM_002544.4	NP_002535.3	OMG	213	1536	21	0	52	88	440	433
NM_003037.4	NP_003028.1	SLAMF1	366	1374	84	0	52	50	335	307
NM_003462.3	NP_003453.2	DNALI1	10	853	66	0	52	93	280	258
NM_005011.4	NP_005002.3	NRF1	129	1641	33	0	52	101	503	492
NM_012459.2	NP_036591.2	TIMM8B	30	327	45	0	52	105	98	83
NM_016423.2	NP_057507.2	ZNF219	421	2590	123	0	52	104	722	681
NM_017666.4	NP_060136.1	ZNF280C	203	2417	4	1	52	55	737	25
NM_018217.2	NP_060687.2	EDEM2	100	1837	58	1	52	75	578	56
NM_020822.2	NP_065873.2	KCNT1	74	3782	98	2	52	64	1235	104
NM_022158.3	NP_071441.1	FN3K	61	991	150	0	52	72	309	259
NM_024515.5	NP_078791.3	WDR25	244	1879	24	0	52	87	544	536
NM_032420.3	NP_115796.2	PCDH1	148	3862	66	0	52	86	1237	1215
NM_033238.2	NP_150241.2	PML	140	2789	66	0	52	77	882	860
NM_080661.4	NP_542392.2	GLYATL1	50	1052	24	0	52	75	333	325
NM_130902.2	NP_570972.2	COX7B2	180	426	3	0	52	124	81	80
NM_133330.2	NP_579877.1	NSD2, WHSC1	494	4592	60	0	52	91	1365	1345
NM_138468.5	NP_612477.3	ICA1L	501	1950	54	0	52	112	482	464
NM_172359.2	NP_758869.1	CD46	175	1375	69	0	52	82	399	376
NM_175884.5	NP_787080.2	CCDC71L	292	1000	12	0	52	97	235	231
NM_198463.3	NP_940865.1	CFAP20DC, C3orf67	452	2144	29	2	52	50	563	2
NM_198976.2	NP_945327.2	NELFCD	48	1848	27	0	52	121	599	590
NM_001099221.1	NP_001092691.1	TIFAB	201	687	70	1	53	79	161	54
NM_001162936.1	NP_001156408.1	SMIM9	309	609	38	2	53	75	99	35
NM_001271829.1	NP_001258758.1	C9orf92	6	333	60	0	53	72	108	88
NM_001278267.1	NP_001265196.1	NBPF20	1200	16824	28	1	53	42	5207	24
NM_001290355.2	NP_001277284.1	NWD1	1479	5769	18	0	53	105	1429	1423
NM_001302809.1	NP_001289738.1	C17orf77	526	1258	4	1	53	49	243	8
NM_001321026.1	NP_001307955.1	BOLA1	366	780	36	0	53	116	137	125
NM_003120.2	NP_003111.2	SPI1	223	1036	18	0	53	85	270	264
NM_005967.3	NP_005958.1	NAB2	378	1956	99	0	53	111	525	492
NM_007208.3	NP_009139.1	MRPL3	195	1242	124	1	53	67	348	31
NM_012164.3	NP_036296.2	FBXW2	238	1603	23	2	53	108	454	2
NM_014643.3	NP_055458.1	ZNF516	318	3810	24	0	53	74	1163	1155
NM_014847.3	NP_055662.3	UBAP2L	167	3431	3	0	53	88	1087	1086
NM_015185.2	NP_056000.1	ARHGEF9	839	2390	47	2	53	118	516	13
NM_016252.3	NP_057336.3	BIRC6	134	14708	84	0	53	116	4857	4829
NM_016547.2	NP_057631.1	SDF4	329	1376	21	0	53	109	348	341
NM_017757.2	NP_060227.2	ZNF407	57	6804	3	0	53	79	2248	2247
NM_018006.4	NP_060476.2	TRMU	364	1630	105	0	53	38	421	386
NM_018040.4	NP_060510.1	GPATCH2	141	1728	72	0	53	74	528	504
NM_018323.3	NP_060793.2	PI4K2B	133	1579	67	1	53	118	481	24
NM_018999.3	NP_061872.2	CCSER2	259	2764	52	1	53	73	834	5
NM_020182.4	NP_064567.2	PMEPA1	393	1257	12	0	53	75	287	283
NM_023078.4	NP_075566.2	PYCR3, PYCRL	30	891	36	0	53	114	286	274
NM_024516.3	NP_078792.1	PAGR1	319	1084	19	1	53	68	254	17
NM_024701.3	NP_078977.2	ASB13	44	881	235	1	53	28	278	22
NM_032538.2	NP_115927.1	TTBK1	83	4049	39	0	53	84	1321	1308
NM_052865.3	NP_443097.1	MGME1	310	1345	6	0	53	102	344	342
NM_080675.3	NP_542406.2	SUN5	93	1233	49	1	53	88	379	28
NM_144587.3	NP_653188.2	BTBD16	261	1782	6	0	53	88	506	504
NM_152455.3	NP_689668.3	ZSCAN29	147	2706	3	0	53	102	852	851
NM_152734.3	NP_689947.2	C6orf89	163	1228	21	0	53	78	354	347
NM_175709.4	NP_783640.1	CBX7	206	962	101	2	53	100	251	35
NM_177966.6	NP_808881.3	PDE12	133	1963	102	0	53	75	609	575
NM_178128.5	NP_835229.3	FADS6	216	1323	18	0	53	63	368	362
NM_001005463.2	NP_001005463.1	EBF3	59	1715	42	0	54	105	551	537
NM_001039690.3	NP_001034779.1	CHTF8	142	508	47	2	54	104	121	30
NM_001042610.2	NP_001036075.1	DBNDD1	214	691	97	1	54	103	158	29
NM_001144877.2	NP_001138349.1	SCAI	122	1943	123	0	54	87	606	565
NM_001145073.2	NP_001138545.1	USP27X	441	1758	13	1	54	92	438	18
NM_001198910.1	NP_001185839.1	CCDC169-SOHLH2	315	1824	85	1	54	84	502	22
NM_001204425.1	NP_001191354.1	BIVM-ERCC5	122	5045	31	1	54	78	1640	22
NM_001242784.2	NP_001229713.1	HLCS	1448	3629	18	0	54	69	726	720
NM_001258419.1	NP_001245348.1	LRRC4C	701	2624	12	0	54	104	640	636
NM_003179.2	NP_003170.1	SYP	16	958	18	0	54	79	313	307
NM_003439.3	NP_003430.1	ZKSCAN1	263	1955	3	0	54	92	563	562
NM_003808.3	NP_003799.1	TNFSF13	748	1501	51	0	54	87	250	233
NM_004073.3	NP_004064.2	PLK3	239	2180	117	0	54	91	646	607
NM_004606.4	NP_004597.2	TAF1	76	5758	60	0	54	91	1893	1873
NM_004664.3	NP_004655.1	LIN7A	193	895	39	0	54	106	233	220
NM_007249.4	NP_009180.3	KLF12	222	1431	12	0	54	70	402	398
NM_017693.3	NP_060163.2	BIVM	679	2191	31	1	54	78	503	22
NM_019897.2	NP_063950.2	OR2S2	56	1016	13	1	54	71	319	5
NM_020904.2	NP_065955.2	PLEKHA4	551	2891	133	1	54	81	779	51
NM_021070.4	NP_066548.2	LTBP3	269	4040	42	0	54	69	1256	1242
NM_022062.2	NP_071345.2	PKNOX2	314	1733	3	0	54	118	472	471
NM_024007.4	NP_076870.1	EBF1	284	2060	42	0	54	90	591	577
NM_024616.2	NP_078892.2	C3orf52	73	727	85	1	54	70	217	39
NM_024787.3	NP_079063.2	RNF122	405	873	72	0	54	59	155	131
NM_030580.4	NP_085057.3	ZNF34	107	1790	63	0	54	116	560	539
NM_030621.4	NP_085124.2	DICER1	292	6061	30	0	54	119	1922	1912
NM_138348.5	NP_612357.4	OTULIN	181	1240	15	0	54	73	352	347
NM_139167.3	NP_631906.2	SGCZ	660	1599	39	0	54	110	312	299
NM_152310.2	NP_689523.1	ELOVL3	271	1084	12	0	54	97	270	266
NM_173852.3	NP_776251.1	KRTCAP2	26	515	75	0	54	72	162	137
NM_177403.5	NP_796377.3	RAB7B	304	904	82	1	54	86	199	29
NM_194287.2	NP_919263.2	LRRC74A	114	1581	78	0	54	61	488	462
NM_000276.3	NP_000267.2	OCRL	165	2871	51	0	55	78	901	884
NM_000284.3	NP_000275.1	PDHA1	145	1318	9	0	55	110	390	387
NM_000325.5	NP_000316.2	PITX2	638	1613	9	0	55	33	324	321
NM_000723.4	NP_000714.3	CACNB1	208	2005	18	0	55	86	598	592
NM_001001917.2	NP_001001917.2	OR56A1	37	994	12	0	55	76	318	314
NM_001002923.1	NP_001002923.1	IGFL4	54	429	86	2	55	72	124	19
NM_001013693.2	NP_001013715.2	LDLRAD2	187	1006	541	1	55	117	272	53
NM_001031685.2	NP_001026855.2	TP53BP2	292	3697	18	0	55	111	1134	1128
NM_001038704.2	NP_001033793.2	SEPTIN4, C17orf47	186	1899	91	1	55	105	570	15
NM_001080424.2	NP_001073893.1	KDM6B	376	5425	119	2	55	70	1682	26
NM_001080534.2	NP_001074003.1	UNC13C	256	6901	60	0	55	93	2214	2194
NM_001099408.1	NP_001092878.1	EIF4E1B	584	1313	162	0	55	60	242	188
NM_001126111.2	NP_001119583.1	OSGIN2	260	1910	132	0	55	65	549	505
NM_001130677.1	NP_001124149.1	EPOP, C17orf96	439	1579	253	1	55	97	379	2
NM_001136571.1	NP_001130043.1	ZAR1L	29	995	25	1	55	95	321	66
NM_001143757.1	NP_001137229.1	LRRC27	348	1941	100	1	55	106	530	16
NM_001177317.1	NP_001170788.1	SLC34A3	224	2024	79	1	55	89	599	23
NM_001278393.1	NP_001265322.1	USP44	360	2499	9	0	55	82	712	709
NM_002316.3	NP_002307.2	LMX1B	7	1195	69	0	55	108	395	372
NM_002518.3	NP_002509.2	NPAS2	286	2761	4	1	55	32	824	86
NM_003221.3	NP_003212.2	TFAP2B	166	1549	33	0	55	116	460	449
NM_004152.3	NP_004143.1	OAZ1	113	801	99	0	55	78	228	35
NM_004196.4	NP_004187.2	CDKL1	53	1130	3	0	55	86	358	357
NM_005123.3	NP_005114.1	NR1H4	476	1895	12	0	55	99	472	468
NM_005600.2	NP_005591.1	NIT1	105	1089	108	0	55	108	327	291
NM_005938.3	NP_005929.2	FOXO4	380	1898	13	1	55	77	505	11
NM_016231.4	NP_057315.3	NLK	212	1796	33	0	55	104	527	516
NM_016628.4	NP_057712.2	WAC	88	2032	6	0	55	98	647	645
NM_019073.3	NP_061946.1	SPATA6	200	1667	134	2	55	77	488	16
NM_023930.3	NP_076419.2	KCTD14	25	793	39	0	55	103	255	242
NM_024326.3	NP_077302.3	FBXL15	1316	2219	12	0	55	72	300	296
NM_024612.4	NP_078888.4	DHX40	147	2487	122	2	55	97	779	40
NM_052943.3	NP_443175.2	TENT5B, FAM46B	172	1450	3	0	55	69	425	424
NM_138347.4	NP_612356.2	ZNF551	195	2208	48	0	55	127	670	654
NM_138813.3	NP_620168.1	ATP8B3	239	4142	159	0	55	94	1300	1247
NM_139245.3	NP_640338.2	PPM1L	105	1188	15	0	55	101	360	355
NM_139281.2	NP_644810.1	WDR36	117	2973	168	0	55	79	951	895
NM_144715.3	NP_653316.3	EFHB	196	2698	6	0	55	86	833	831
NM_198968.3	NP_945319.1	DZIP1	855	3459	33	0	55	75	867	856
NM_000174.4	NP_000165.1	GP9	222	756	68	2	56	69	177	48
NM_001018058.2	NP_001018068.1	TFEC	253	1210	38	2	56	54	318	22
NM_001037668.1	NP_001032757.2	DEFB107A	88	301	12	0	56	94	70	66
NM_001040705.1	NP_001035795.1	DEFB107B	88	301	12	0	56	94	70	66
NM_001100396.1	NP_001093866.1	C2orf73	42	906	43	1	56	79	287	3
NM_001199805.1	NP_001186734.1	KLRC4-KLRK1	535	1186	42	0	56	76	216	202
NM_001278081.1	NP_001265010.1	LOC388282	72	594	69	0	56	85	173	150
NM_001278694.1	NP_001265623.1	GPR132	1122	2265	9	0	56	77	380	377
NM_001287497.1	NP_001274426.1	TMEM168	483	2577	48	0	56	100	697	681
NM_001289922.2	NP_001276851.1	C22orf34	1072	1528	28	1	56	46	151	40
NM_001300965.1	NP_001287894.1	CSRP2	79	661	76	1	56	114	193	18
NM_001306087.1	NP_001293016.1	SLC35F4	49	1507	4	1	56	54	485	124
NM_001776.5	NP_001767.3	ENTPD1	324	1857	145	1	56	111	510	32
NM_001841.2	NP_001832.1	CNR2	127	1210	8	2	56	98	360	76
NM_002135.4	NP_002126.2	NR4A1	319	2116	22	1	56	94	598	18
NM_002767.3	NP_002758.1	PRPSAP2	322	1432	36	0	56	104	369	357
NM_005393.2	NP_005384.2	PLXNB3	174	5904	42	0	56	90	1909	1895
NM_006061.3	NP_006052.2	CRISP3	88	865	39	0	56	98	258	245
NM_006656.5	NP_006647.3	NEU3	156	1542	30	0	56	57	461	451
NM_007155.5	NP_009086.4	ZP3	340	1462	6	0	56	90	373	371
NM_007360.3	NP_031386.2	KLRK1	177	828	42	0	56	76	216	202
NM_012203.1	NP_036335.1	GRHPR	41	1028	18	0	56	78	328	322
NM_014687.3	NP_055502.1	RUBCN	207	3126	21	0	56	90	972	965
NM_015319.2	NP_056134.2	TNS2	195	4455	4	1	56	59	1419	22
NM_016535.3	NP_057619.1	ZNF581	174	768	57	0	56	75	197	178
NM_017649.4	NP_060119.3	CNNM2	163	2791	36	0	56	92	875	863
NM_017860.4	NP_060330.2	C1orf56	108	1134	96	0	56	102	341	309
NM_018216.2	NP_060686.2	PANK4	17	2363	24	0	56	117	781	773
NM_018242.2	NP_060712.2	SLC47A1	86	1799	150	0	56	47	570	520
NM_018967.4	NP_061840.1	SNTG1	661	2215	55	1	56	83	517	12
NM_020655.3	NP_065706.2	JPH3	260	2507	79	1	56	118	748	133
NM_025108.2	NP_079384.2	TEDC2, C16orf59	31	1333	118	1	56	34	433	10
NM_030817.2	NP_110444.3	APOLD1	85	832	6	0	56	89	248	246
NM_031297.4	NP_112587.2	RNF208	111	897	51	0	56	92	261	244
NM_032221.4	NP_115597.3	CHD6	178	8326	6	0	56	97	2715	2713
NM_032452.2	NP_115828.2	JPH4	918	2805	73	1	56	100	628	66
NM_033117.3	NP_149108.1	RBM18	166	739	34	1	56	108	190	39
NM_138422.3	NP_612431.2	ADAT3	384	1488	48	0	56	87	367	351
NM_138423.3	NP_612432.2	GOLM2, CASC4	319	1630	311	2	56	80	436	3
NM_144580.2	NP_653181.1	GLMP	44	1265	208	1	56	101	406	11
NM_153708.2	NP_714919.2	RTP1	30	822	108	0	56	85	263	227
NM_000695.3	NP_000686.2	ALDH3B2	439	1597	7	1	57	89	385	9
NM_001005191.2	NP_001005191.1	OR7D4	34	973	55	1	57	75	312	63
NM_001080491.3	NP_001073960.1	USP6NL	48	2586	67	1	57	112	845	1
NM_001136003.1	NP_001129475.1	C2CD4D	586	1648	955	1	57	76	353	21
NM_001145080.2	NP_001138552.2	MEIOC	220	3079	159	0	57	108	952	899
NM_001145161.2	NP_001138633.1	UBE2QL1	271	757	129	0	57	80	161	118
NM_001164444.1	NP_001157916.1	CBY3	56	785	43	1	57	89	242	164
NM_001199148.1	NP_001186077.1	SLC38A11	331	1552	52	1	57	60	406	9
NM_001278.4	NP_001269.3	CHUK	78	2316	48	0	57	75	745	729
NM_001321127.1	NP_001308056.1	PHF7	901	2047	26	2	57	71	381	10
NM_001322194.1	NP_001309123.1	JAK2	595	3994	6	0	57	144	1132	1130
NM_001807.4	NP_001798.2	CEL	16	2287	9	0	57	101	756	753
NM_002917.1	NP_002908.1	RFNG	8	1004	378	0	57	87	331	205
NM_004716.3	NP_004707.2	PCSK7	631	2989	34	1	57	32	785	13
NM_005032.6	NP_005023.2	PLS3	419	2312	4	1	57	36	630	51
NM_005194.3	NP_005185.2	CEBPB	451	1489	29	2	57	86	345	11
NM_006219.2	NP_006210.1	PIK3CB	16	3229	18	0	57	89	1070	1064
NM_015651.2	NP_056466.1	PHF19	253	1996	40	1	57	45	580	22
NM_016568.3	NP_057652.1	RXFP3	355	1765	6	0	57	120	469	467
NM_017779.5	NP_060249.2	DEPDC1	222	1806	52	1	57	80	527	12
NM_018031.4	NP_060501.3	WDR6	280	3736	90	0	57	74	1151	1121
NM_018275.4	NP_060745.3	MAP11, C7orf43	222	1965	24	0	57	79	580	572
NM_020809.3	NP_065860.2	ARHGAP20	285	3861	9	0	57	78	1191	1188
NM_022036.2	NP_071319.2	GPRC5C	511	1972	135	0	57	117	486	441
NM_025041.2	NP_079317.2	C3orf36	1009	1507	129	0	57	124	165	122
NM_130806.4	NP_570718.1	RXFP2	70	2335	51	0	57	113	754	737
NM_138333.4	NP_612206.4	FAM122A	33	1023	73	1	57	107	329	6
NM_145032.3	NP_659469.3	FBXL13	427	2635	15	0	57	51	735	730
NM_175883.2	NP_787079.1	OR7D2	188	1127	99	0	57	63	312	279
NM_182932.2	NP_891977.1	SLC8A3	754	3520	76	1	57	46	921	58
NM_194300.4	NP_919276.2	ITPRID1, CCDC129	35	3170	3	0	57	115	1044	1043
NM_203301.3	NP_976046.1	FBXO33	338	2006	174	0	57	95	555	497
NM_203327.1	NP_976072.1	SLC23A2	393	2346	3	0	57	94	650	649
NM_206996.3	NP_996879.1	SPAG17	112	6784	50	2	57	101	2223	27
NM_207406.3	NP_997289.2	BEND4	580	2185	12	0	57	107	534	530
NM_001004297.2	NP_001004297.2	OR13A1	309	1296	12	0	58	36	328	324
NM_001009611.4	NP_001009611.2	PRAMEF4	71	1508	6	0	58	92	478	476
NM_001009880.1	NP_001009880.1	KIAA0930	66	1281	76	1	58	95	404	80
NM_001009997.2	NP_001009997.2	C10orf62	205	877	91	1	58	77	223	44
NM_001017922.1	NP_001017922.1	ERMAP	270	1698	6	0	58	128	475	473
NM_001032409.2	NP_001027581.1	OAS1	263	1508	3	0	58	81	414	413
NM_001040283.2	NP_001035373.1	DMRTC2	83	1187	15	0	58	67	367	362
NM_001080492.1	NP_001073961.1	PRSS54	395	1583	28	1	58	127	395	63
NM_001098376.2	NP_001091846.1	PRAMEF15	94	1531	6	0	58	92	478	476
NM_001130045.1	NP_001123517.1	TTLL10	151	2173	219	0	58	97	673	600
NM_001146344.2	NP_001139816.2	PRAMEF11	71	1508	6	0	58	92	478	476
NM_001169109.1	NP_001162580.1	SCO2	207	1008	375	0	58	83	266	141
NM_001291904.2	NP_001278833.2	LOC79999	78	549	129	0	58	91	156	113
NM_001291905.2	NP_001278834.2	LOC388436	78	549	129	0	58	91	156	113
NM_001306072.1	NP_001293001.1	PRAMEF26	16	1453	6	0	58	92	478	476
NM_001310134.1	NP_001297063.1	PRAMEF25	16	1453	6	0	58	92	478	476
NM_001319240.1	NP_001306169.1	LOC100287896	846	2025	40	1	58	76	392	24
NM_002228.3	NP_002219.1	JUN	1043	2039	12	0	58	75	331	327
NM_003702.4	NP_003693.2	RGS20	144	870	72	0	58	101	241	217
NM_004350.2	NP_004341.1	RUNX3	411	1659	84	0	58	95	415	387
NM_004756.4	NP_004747.1	NUMBL	175	2005	123	0	58	91	609	568
NM_005060.3	NP_005051.2	RORC	108	1665	245	2	58	55	518	82
NM_005542.5	NP_005533.2	INSIG1	215	1049	108	0	58	95	277	241
NM_006162.4	NP_006153.2	NFATC1	453	2931	108	0	58	91	825	789
NM_006570.4	NP_006561.1	RRAGA	286	1228	15	0	58	97	313	308
NM_006898.4	NP_008829.3	HOXD3	176	1475	48	0	58	124	432	416
NM_006900.3	NP_008831.3	IFNA13	66	639	3	0	58	121	190	189
NM_007148.4	NP_009079.2	RNF112	231	2127	72	0	58	84	631	607
NM_014699.3	NP_055514.3	ZNF646	289	5788	261	0	58	86	1832	1745
NM_015138.4	NP_055953.3	RTF1	12	2145	120	0	58	76	710	670
NM_016023.3	NP_057107.3	OTUD6B	99	1071	90	0	58	84	323	293
NM_018127.6	NP_060597.4	ELAC2	117	2598	45	0	58	81	826	811
NM_022785.3	NP_073622.2	EFCAB6	314	4820	9	0	58	116	1501	1498
NM_023938.5	NP_076427.2	C1orf116	259	2065	72	0	58	81	601	577
NM_024927.4	NP_079203.3	PLEKHH3	467	2849	20	2	58	77	793	22
NM_025181.4	NP_079457.2	SLC35F5	414	1986	138	0	58	72	523	477
NM_032415.5	NP_115791.3	CARD11	404	3869	21	0	58	76	1154	1147
NM_033194.2	NP_149971.1	HSPB9	113	593	93	0	58	70	159	128
NM_152243.2	NP_689449.1	CDC42EP1	403	1579	36	0	58	80	391	379
NM_152531.4	NP_689744.3	XXYLT1	108	1290	26	2	58	66	393	128
NM_181337.3	NP_851854.1	KAAG1	737	992	4	1	58	55	84	7
NM_182985.4	NP_892030.3	TRIM69	343	1846	46	1	58	115	500	3
NM_194250.1	NP_919226.1	ZNF804A	594	4224	115	1	58	84	1209	7
NM_206827.1	NP_996563.1	RASL11A	618	1347	15	0	58	93	242	237
NM_207396.2	NP_997279.2	RNF207	174	2079	46	1	58	39	634	53
NM_001010881.1	NP_001010881.1	C1orf167	183	4533	16	1	59	56	1449	30
NM_001011878.2	NP_001011878.1	DEFB121	114	345	60	0	59	98	76	56
NM_001024598.3	NP_001019769.1	HES3	65	626	28	1	59	94	186	31
NM_001037277.1	NP_001032354.1	GGPS1	84	987	162	0	59	114	300	246
NM_001099402.1	NP_001092872.1	CCNK	130	1873	65	2	59	101	580	5
NM_001099784.2	NP_001093254.2	FBXL19	158	2243	6	0	59	80	694	692
NM_001103176.1	NP_001096646.1	CNPY1	145	424	118	1	59	56	92	5
NM_001114090.1	NP_001107562.1	NGEF	152	2009	130	1	59	101	618	23
NM_001134375.1	NP_001127847.1	CCNJ	359	1511	213	0	59	28	383	312
NM_001193317.1	NP_001180246.1	VIPAS39	323	1805	19	1	59	79	493	25
NM_001272086.2	NP_001259015.1	LOC100130370	229	574	5	2	59	118	114	14
NM_001290189.1	NP_001277118.1	MYADM	681	1650	69	0	59	78	322	299
NM_001293289.1	NP_001280218.1	SPRY4	637	1537	48	0	59	89	299	283
NM_001310156.1	NP_001297085.1	SPATA1	189	1569	66	0	59	88	459	437
NM_001485.3	NP_001476.2	GBX2	38	1085	27	0	59	64	348	339
NM_002115.2	NP_002106.2	HK3	92	2864	171	0	59	55	923	866
NM_004969.3	NP_004960.2	IDE	76	3136	123	0	59	97	1019	978
NM_005029.3	NP_005020.1	PITX3	154	1063	264	0	59	75	302	214
NM_005308.2	NP_005299.1	GRK5	233	2006	167	2	59	31	590	1
NM_005716.3	NP_005707.1	GIPC1	287	1289	49	1	59	83	333	80
NM_005761.2	NP_005752.1	PLXNC1	249	4956	789	0	59	112	1568	1305
NM_006548.5	NP_006539.3	IGF2BP2	96	1896	3	0	59	85	599	598
NM_007313.2	NP_009297.2	ABL1	439	3889	100	1	59	102	1149	18
NM_012331.4	NP_036463.1	MSRA	248	956	66	0	59	111	235	213
NM_013246.2	NP_037378.1	CLCF1	196	874	30	0	59	85	225	215
NM_013306.4	NP_037438.2	SNX15	130	1159	19	1	59	97	342	23
NM_014249.3	NP_055064.1	NR2E3	196	1429	24	0	59	69	410	402
NM_014338.3	NP_055153.1	PISD	430	1558	3	0	59	87	375	374
NM_014682.2	NP_055497.1	ST18	820	3964	4	1	59	45	1047	22
NM_014907.2	NP_055722.2	FRMPD1	44	4781	57	0	59	74	1578	1559
NM_015156.3	NP_055971.2	RCOR1	228	1686	9	0	59	77	485	482
NM_015276.1	NP_056091.1	USP22	204	1782	33	0	59	74	525	514
NM_020369.2	NP_065102.1	FSCN3	219	1716	4	1	59	42	498	14
NM_020722.1	NP_065773.1	CRACD, KIAA1211	391	4093	22	1	59	86	1233	51
NM_024523.5	NP_078799.2	GCC1	418	2746	15	0	59	79	775	770
NM_024798.2	NP_079074.2	SNX22	59	641	72	0	59	62	193	169
NM_025092.4	NP_079368.3	PGGHG, ATHL1	115	2329	139	1	59	122	737	29
NM_025182.3	NP_079458.2	FAM214B	326	1943	99	0	59	86	538	505
NM_031281.2	NP_112571.2	FCRL5	158	3092	89	2	59	69	977	45
NM_138793.3	NP_620148.1	CANT1	495	1701	29	2	59	76	401	2
NM_139118.2	NP_620829.1	YY1AP1	56	2447	190	1	59	77	796	2
NM_152264.4	NP_689477.2	SLC39A13	197	1292	8	2	59	66	364	137
NM_172364.4	NP_758952.4	CACNA2D4	231	3645	51	0	59	77	1137	1120
NM_173644.2	NP_775915.1	C20orf197	306	687	100	1	59	102	126	17
NM_175734.4	NP_783861.3	SPEM2, C17orf74	73	1579	14	2	59	119	501	2
NM_182828.3	NP_878248.2	GDF7	576	1929	273	0	59	44	450	359
NM_207397.4	NP_997280.2	CD164L2	94	616	65	2	59	64	173	8
NM_000444.5	NP_000435.3	PHEX	562	2812	173	2	60	118	749	10
NM_000494.3	NP_000485.3	COL17A1	169	4663	4	1	60	61	1497	1
NM_000681.3	NP_000672.3	ADRA2A	965	2363	45	0	60	94	465	450
NM_001008537.2	NP_001008537.1	NEXMIF, KIAA2022	617	5168	61	1	60	80	1516	14
NM_001010892.2	NP_001010892.1	RSPH4A	145	2296	68	2	60	98	716	12
NM_001013615.2	NP_001013633.1	LURAP1	93	813	40	1	60	85	239	48
NM_001025930.3	NP_001021100.3	TTLL3	47	2795	191	2	60	91	915	139
NM_001033561.1	NP_001028733.1	PHF12	530	3545	12	0	60	80	1004	1000
NM_001042690.1	NP_001036155.1	MSANTD1	183	1020	66	0	60	105	278	256
NM_001085461.1	NP_001078930.1	CTNND1	571	3373	148	1	60	88	933	33
NM_001098208.1	NP_001091678.1	HNRNPF	487	1735	3	0	60	110	415	414
NM_001130448.2	NP_001123920.1	C15orf62	535	1063	178	1	60	109	175	105
NM_001134875.1	NP_001128347.1	TEDC1, C14orf80	127	1408	257	2	60	99	426	14
NM_001193311.1	NP_001180240.1	SUGCT	24	1440	21	0	60	88	471	464
NM_001242487.1	NP_001229416.1	ZSWIM8	255	5769	9	0	60	74	1837	1834
NM_001242521.1	NP_001229450.1	TEX46, C1orf234	77	443	10	1	60	95	121	9
NM_001320848.1	NP_001307777.1	FAHD2B	314	1259	78	0	60	88	314	288
NM_001763.2	NP_001754.2	CD1A	533	1517	43	1	60	110	327	34
NM_002121.5	NP_002112.3	HLA-DPB1	116	893	3	0	60	89	258	257
NM_003786.3	NP_003777.2	ABCC3	80	4664	219	0	60	88	1527	1454
NM_003814.4	NP_003805.3	ADAM20	245	2576	50	2	60	112	776	28
NM_003845.2	NP_003836.1	DYRK4	166	1729	154	1	60	68	520	41
NM_004726.2	NP_004717.2	REPS2	171	2154	392	2	60	64	660	1
NM_004750.4	NP_004741.1	CRLF1	194	1463	310	1	60	111	422	44
NM_005178.4	NP_005169.2	BCL3	70	1435	8	2	60	65	454	120
NM_005236.2	NP_005227.1	ERCC4	9	2760	33	0	60	111	916	905
NM_005303.2	NP_005294.1	FFAR1	10	913	34	1	60	81	300	34
NM_006041.2	NP_006032.1	HS3ST3B1	469	1642	37	1	60	92	390	16
NM_012449.2	NP_036581.1	STEAP1	200	1220	45	0	60	88	339	324
NM_014311.2	NP_055126.1	SMUG1	150	963	31	1	60	74	270	31
NM_014957.3	NP_055772.2	DENND3	287	3884	88	1	60	95	1198	37
NM_015094.2	NP_055909.2	HIC2	230	2078	54	0	60	95	615	597
NM_015454.2	NP_056269.1	LARP7	150	1899	33	0	60	72	582	571
NM_016044.2	NP_057128.2	FAHD2A	179	1124	78	0	60	88	314	288
NM_016338.4	NP_057422.3	IPO11	190	3118	169	1	60	90	975	1
NM_018337.3	NP_060807.2	ZNF444	388	1372	174	0	60	86	327	269
NM_020920.3	NP_065971.2	CHD8	147	7056	73	1	60	99	2302	3
NM_021198.2	NP_067021.1	CTDSP1	336	1122	145	1	60	89	261	60
NM_022571.5	NP_072093.2	GPR135	115	1600	36	0	60	130	494	482
NM_022763.3	NP_073600.3	FNDC3B	172	3787	12	0	60	99	1204	1200
NM_023917.2	NP_076406.1	TAS2R9	93	1032	70	1	60	77	312	5
NM_030641.3	NP_085144.1	APOL6	294	1326	52	1	60	71	343	25
NM_031936.4	NP_114142.3	GPR61	683	2039	112	1	60	89	451	16
NM_032243.5	NP_115619.4	TXNDC2	447	1908	21	0	60	80	486	479
NM_032279.3	NP_115655.2	ATP13A4	323	3914	37	1	60	74	1196	62
NM_052818.2	NP_438169.2	N4BP2L1	96	828	190	1	60	95	243	6
NM_053052.3	NP_444280.2	SNAP47	414	1809	135	0	60	76	464	419
NM_144772.2	NP_658985.2	NAXE	39	906	153	0	60	130	288	237
NM_147197.2	NP_671730.1	WFDC11	195	459	12	0	60	84	87	83
NM_152572.2	NP_689785.1	AK8	556	1996	39	0	60	68	479	466
NM_152704.3	NP_689917.2	AMER2	664	2680	126	0	60	78	671	629
NM_176816.4	NP_789786.2	CCDC125	108	1644	61	1	60	99	511	2
NM_198215.3	NP_937858.2	FAM13C	134	1892	88	1	60	61	585	25
NM_203495.3	NP_987091.1	COMMD6	67	325	28	1	60	32	85	10
NM_207342.2	NP_997225.1	STEAP1B	200	938	45	0	60	88	245	230
NM_000707.3	NP_000698.1	AVPR1B	158	1433	22	1	61	67	424	49
NM_001024822.2	NP_001019993.1	RNASE12	100	544	9	0	61	83	147	144
NM_001031855.2	NP_001027026.1	LONRF3	167	2447	24	0	61	75	759	751
NM_001083124.1	NP_001076593.1	SPATA31A3	29	4073	68	2	61	95	1347	28
NM_001109903.1	NP_001103373.1	RNFT2	233	1568	36	0	61	118	444	432
NM_001112704.1	NP_001106175.1	VAX1	245	1250	21	0	61	77	334	327
NM_001113541.1	NP_001107013.1	SPATA31A5	29	4073	68	2	61	95	1347	28
NM_001130404.1	NP_001123876.1	PRR20B	233	899	36	0	61	96	221	209
NM_001130405.1	NP_001123877.1	PRR20C	233	899	36	0	61	96	221	209
NM_001130406.1	NP_001123878.1	PRR20D	233	899	36	0	61	96	221	209
NM_001130407.1	NP_001123879.1	PRR20E	233	899	36	0	61	96	221	209
NM_001134663.1	NP_001128135.1	SAMD13	228	537	15	0	61	70	102	97
NM_001142733.2	NP_001136205.2	ASB14	121	1885	19	1	61	96	587	3
NM_001145124.1	NP_001138596.1	SPATA31C1	29	3596	68	2	61	95	1188	28
NM_001145196.1	NP_001138668.1	SPATA31A6	29	4061	68	2	61	95	1343	28
NM_001162997.1	NP_001156469.1	SMIM6	227	416	34	1	61	84	62	15
NM_001166137.1	NP_001159609.1	SPATA31C2	29	3434	68	2	61	95	1134	28
NM_001178055.1	NP_001171526.1	PARP8	182	2747	6	0	61	92	854	852
NM_001193552.1	NP_001180481.1	ZNF850	159	3432	6	0	61	86	1090	1088
NM_001220488.1	NP_001207417.1	CDH13	264	2547	35	2	61	119	760	32
NM_001252120.1	NP_001239049.1	PASK	286	4258	41	2	61	67	1323	21
NM_001270616.1	NP_001257545.1	PROX1	615	2829	10	1	61	108	737	6
NM_001293228.1	NP_001280157.1	MYCN	733	2128	24	0	61	80	464	456
NM_001321484.1	NP_001308413.1	RPS19	179	617	95	2	61	89	145	17
NM_002479.5	NP_002470.2	MYOG	77	752	10	1	61	40	224	38
NM_004088.3	NP_004079.3	DNTT	170	1700	66	0	61	109	509	487
NM_004277.4	NP_004268.3	SLC25A27	278	1250	47	2	61	108	323	52
NM_004527.3	NP_004518.1	MEOX1	29	794	24	0	61	42	254	246
NM_005169.3	NP_005160.2	PHOX2A	172	1027	45	0	61	76	284	269
NM_005782.3	NP_005773.3	ALYREF	6	801	21	0	61	97	264	257
NM_006573.4	NP_006564.1	TNFSF13B	267	1125	4	1	61	58	285	20
NM_006702.4	NP_006693.3	PNPLA6	283	4267	24	0	61	75	1327	1319
NM_006996.2	NP_008927.1	SLC19A2	204	1698	4	1	61	51	497	51
NM_007048.5	NP_008979.3	BTN3A1	368	1910	6	0	61	128	513	511
NM_015667.2	NP_056482.2	SPATA31A7	29	4073	68	2	61	95	1347	28
NM_016541.2	NP_057625.1	GNG13	102	306	24	0	61	89	67	59
NM_018078.3	NP_060548.2	LARP1B	213	2958	157	1	61	45	914	30
NM_018219.2	NP_060689.2	CCDC87	68	2618	3	0	61	86	849	848
NM_018694.3	NP_061164.3	ARL6IP4	145	1411	49	1	61	81	421	92
NM_021233.2	NP_067056.2	DNASE2B	33	1119	12	0	61	95	361	357
NM_032135.3	NP_115511.3	FSCB	309	2787	25	1	61	78	825	1
NM_032957.4	NP_116575.3	RTEL1	827	4559	19	1	61	46	1243	2
NM_032968.4	NP_116750.1	PCDH11X	44	4088	44	2	61	69	1347	32
NM_134268.4	NP_599030.1	CYGB	363	936	21	0	61	76	190	183
NM_145168.2	NP_660151.2	SDR42E1	128	1310	91	1	61	80	393	4
NM_145699.3	NP_663745.1	APOBEC3A	170	770	36	0	61	50	199	187
NM_152909.3	NP_690873.2	ZNF548	250	1852	76	1	61	62	533	10
NM_173615.4	NP_775886.3	VWA3A	100	3655	39	0	61	131	1184	1171
NM_175738.4	NP_783865.1	RAB37	470	1121	202	1	61	70	216	2
NM_176791.3	NP_789761.1	GTSF1L	308	755	31	1	61	73	148	67
NM_178463.3	NP_848558.1	MIR1-1HG	779	1133	24	0	61	98	117	109
NM_181342.2	NP_851939.1	FKBP7	129	798	12	0	61	101	222	218
NM_198441.2	NP_940843.1	PRR20A	233	899	36	0	61	96	221	209
NM_203370.1	NP_976248.1	INKA1, FAM212A	133	997	6	0	61	110	287	285
NM_000248.3	NP_000239.1	MITF	123	1383	9	0	62	98	419	416
NM_001005272.3	NP_001005272.3	OR4A5	53	1001	81	0	62	104	315	288
NM_001005356.2	NP_001005356.1	POTEG	52	1579	21	0	62	64	508	501
NM_001005365.2	NP_001005365.2	POTEA	43	1540	39	0	62	74	498	485
NM_001009924.1	NP_001009924.1	TMEM230	466	829	3	0	62	75	120	119
NM_001010919.2	NP_001010919.1	CALHM6, FAM26F	118	1066	239	2	62	45	315	122
NM_001038.5	NP_001029.1	SCNN1A	289	2299	60	0	62	70	669	649
NM_001083538.1	NP_001077007.1	POTEE	52	3280	21	0	62	54	1075	1068
NM_001099685.1	NP_001093155.1	RHOXF2B	190	1057	30	0	62	47	288	278
NM_001099771.2	NP_001093241.1	POTEF	400	3628	21	0	62	54	1075	1068
NM_001102658.1	NP_001096128.1	CT62	513	924	3	0	62	104	136	135
NM_001110514.1	NP_001103984.1	EBF4	268	2065	81	0	62	47	598	571
NM_001122779.1	NP_001116251.1	FAM124B	226	1594	4	1	62	42	455	8
NM_001136213.1	NP_001129685.1	POTEH	52	1690	21	0	62	64	545	538
NM_001137671.1	NP_001131143.1	POTEC	454	2083	21	0	62	59	542	535
NM_001145442.1	NP_001138914.1	POTEM	52	1579	21	0	62	64	508	501
NM_001199297.2	NP_001186226.1	UIMC1	378	2538	61	1	62	83	719	9
NM_001243523.1	NP_001230452.1	LOC100130880	121	436	173	2	62	71	104	22
NM_001277303.1	NP_001264232.1	POTEB2	33	1668	21	0	62	59	544	537
NM_001277304.1	NP_001264233.1	POTEB	33	1668	21	0	62	59	544	537
NM_001278597.1	NP_001265526.1	ANO2	72	3072	85	1	62	77	999	133
NM_001278720.1	NP_001265649.1	RHBDL1	125	1247	103	1	62	90	373	32
NM_001321601.1	NP_001308530.1	LOC390877	21	378	42	0	62	113	118	104
NM_002225.3	NP_002216.2	IVD	334	1615	9	0	62	102	426	423
NM_002478.4	NP_002469.2	MYOD1	220	1183	88	1	62	64	320	20
NM_002649.3	NP_002640.2	PIK3CG	310	3619	66	0	62	88	1102	1080
NM_003584.2	NP_003575.2	DUSP11	42	1176	141	0	62	81	377	330
NM_004100.4	NP_004091.3	EYA4	458	2378	22	1	62	58	639	4
NM_005583.4	NP_005574.2	LYL1	654	1497	39	0	62	104	280	267
NM_006095.2	NP_006086.1	ATP8A1	232	3727	9	0	62	86	1164	1161
NM_006319.4	NP_006310.1	CDIPT	431	1073	46	1	62	57	213	54
NM_006486.2	NP_006477.2	FBLN1	147	2259	88	1	62	76	703	76
NM_006670.4	NP_006661.1	TPBG	936	2199	496	1	62	68	420	12
NM_007117.4	NP_009048.1	TRH	439	1168	127	1	62	72	242	86
NM_007358.3	NP_031384.1	MTF2	292	2074	103	1	62	78	593	18
NM_014000.2	NP_054706.1	VCL	94	3499	75	0	62	110	1134	1109
NM_014814.2	NP_055629.1	PSMD6	187	1357	123	0	62	102	389	348
NM_015060.2	NP_055875.1	AVL9	284	2231	25	1	62	131	648	30
NM_015237.3	NP_056052.3	KIAA1107	104	3944	10	1	62	95	1279	39
NM_016426.6	NP_057510.4	GTSE1	212	2432	22	1	62	76	739	10
NM_016626.4	NP_057710.3	MEX3C	361	2341	517	1	62	59	659	23
NM_017506.1	NP_059976.1	OR7A5	223	1183	13	1	62	91	319	77
NM_017799.3	NP_060269.3	TMEM260	122	2246	10	1	62	96	707	52
NM_018639.4	NP_061109.1	WSB2	163	1378	109	1	62	114	404	15
NM_018942.2	NP_061815.2	HMX1	203	1250	370	1	62	75	348	100
NM_020528.2	NP_065389.2	PCBP3	125	1241	96	0	62	81	371	339
NM_020963.4	NP_066014.1	MOV10	499	3511	81	0	62	74	1003	976
NM_021058.3	NP_066402.2	H2BC11, HIST1H2BJ	46	427	121	1	62	70	126	5
NM_021205.5	NP_067028.1	RHOU	666	1443	277	1	62	53	258	4
NM_021633.3	NP_067646.1	KLHL12	229	1936	12	0	62	127	568	564
NM_021640.3	NP_067653.3	MYG1, C12orf10	52	1183	72	0	62	41	376	352
NM_022110.3	NP_071393.2	FKBPL	270	1320	241	1	62	57	349	28
NM_022112.2	NP_071395.2	TP53AIP1	682	1057	99	0	62	61	124	91
NM_024422.4	NP_077740.1	DSC2	461	3167	88	1	62	61	901	5
NM_024551.2	NP_078827.2	ADIPOR2	197	1358	82	1	62	33	386	18
NM_024928.4	NP_079204.2	STN1, OBFC1	250	1357	108	0	62	84	368	332
NM_030809.2	NP_110436.1	CSRNP2	419	2051	4	1	62	34	543	53
NM_030810.4	NP_110437.2	TXNDC5	38	1337	82	1	62	99	432	111
NM_031488.4	NP_113676.2	L3MBTL2	54	2172	45	0	62	70	705	690
NM_032042.5	NP_114431.2	FAM172A	207	1458	48	0	62	103	416	400
NM_032498.2	NP_115887.1	RHOXF2	190	1057	30	0	62	47	288	278
NM_033387.3	NP_203745.2	FAM78A	340	1192	55	1	62	35	283	21
NM_052963.2	NP_443195.1	TOP1MT	30	1836	232	1	62	46	601	5
NM_053282.4	NP_444512.2	SH2D1B	122	521	19	1	62	74	132	3
NM_145043.3	NP_659480.1	NEIL2	713	1712	142	1	62	49	332	10
NM_145798.2	NP_665741.1	OSBPL7	203	2732	135	0	62	70	842	797
NM_153228.2	NP_694960.2	ANKFN1	35	2327	122	2	62	76	763	1
NM_174981.3	NP_778146.2	POTED	52	1807	21	0	62	59	584	577
NM_178537.4	NP_848632.2	B4GALNT4	9	3129	36	0	62	72	1039	1027
NM_180990.3	NP_851321.2	ZACN	83	1322	3	0	62	114	412	411
NM_198055.1	NP_932172.1	MZF1	561	2766	46	1	62	87	734	6
NM_198859.3	NP_942559.1	PRICKLE2	586	3121	12	0	62	62	844	840
NM_199461.3	NP_955631.1	NANOS1	86	965	57	0	62	102	292	273
NM_207355.3	NP_997238.2	POTEB3	371	2117	21	0	62	59	581	574
NM_213604.2	NP_998769.2	ADAMTSL5	444	1860	226	1	62	73	471	133
NM_000149.3	NP_000140.1	FUT3	638	1724	29	2	63	95	361	35
NM_000150.2	NP_000141.1	FUT6	1195	2275	75	0	63	94	359	334
NM_000710.3	NP_000701.2	BDKRB1	220	1282	64	1	63	117	353	31
NM_001025091.1	NP_001020262.1	ABCF1	95	2633	259	1	63	83	845	48
NM_001031812.3	NP_001026982.1	CSNK1G3	719	1991	34	1	63	62	423	25
NM_001044370.1	NP_001037835.1	MPPED1	223	1204	19	1	63	68	326	4
NM_001079675.2	NP_001073143.1	ETV4	299	1754	12	0	63	88	484	480
NM_001083601.2	NP_001077070.1	NAA60	303	1032	61	1	63	97	242	2
NM_001145652.1	NP_001139124.1	C6orf141	393	1128	4	1	63	61	244	34
NM_001145853.1	NP_001139325.1	WFS1	166	2839	82	1	63	74	890	114
NM_001166345.1	NP_001159817.1	MDFIC	590	1331	98	2	63	78	246	1
NM_001252402.2	NP_001239331.1	TMEM249	164	872	192	0	63	74	235	171
NM_001289166.1	NP_001276095.1	ZNF227	218	2618	16	1	63	100	799	10
NM_001289824.1	NP_001276753.1	FURIN	380	2765	23	2	63	100	794	14
NM_001289947.1	NP_001276876.1	ERICH2	53	524	13	1	63	54	156	7
NM_001321831.1	NP_001308760.1	NFKBID	378	1365	28	1	63	51	328	1
NM_001654.4	NP_001645.1	ARAF	211	2032	28	1	63	98	606	23
NM_002034.2	NP_002025.2	FUT5	88	1213	118	1	63	78	374	37
NM_002049.3	NP_002040.1	GATA1	91	1333	124	1	63	42	413	94
NM_002133.2	NP_002124.1	HMOX1	107	974	24	0	63	74	288	280
NM_002183.3	NP_002174.1	IL3RA	349	1486	93	0	63	91	378	347
NM_002269.2	NP_002260.2	KPNA5	131	1751	4	1	63	30	539	12
NM_002516.3	NP_002507.1	NOVA2	48	1527	245	2	63	77	492	31
NM_002520.6	NP_002511.1	NPM1	245	1130	12	0	63	64	294	290
NM_003069.4	NP_003060.2	SMARCA1	135	3300	46	1	63	51	1054	8
NM_003367.3	NP_003358.1	USF2	124	1165	6	0	63	104	346	344
NM_003585.4	NP_003576.2	DOC2B	151	1390	51	0	63	96	412	395
NM_004235.5	NP_004226.3	KLF4	548	1988	27	0	63	107	479	470
NM_004752.3	NP_004743.1	GCM2	72	1593	48	0	63	90	506	490
NM_005515.3	NP_005506.3	MNX1	303	1509	660	0	63	93	401	181
NM_005640.2	NP_005631.1	TAF4B	51	2640	72	0	63	110	862	838
NM_006361.5	NP_006352.2	HOXB13	156	1011	16	1	63	75	284	27
NM_006712.4	NP_006703.1	FASTK	117	1767	80	2	63	90	549	126
NM_006953.3	NP_008884.1	UPK3A	27	891	141	0	63	44	287	240
NM_007159.4	NP_009090.2	SLMAP	396	2832	61	1	63	93	811	59
NM_012267.4	NP_036399.3	HSPBP1	443	1523	150	0	63	111	359	309
NM_012290.4	NP_036422.3	TLK1	472	2773	144	0	63	79	766	718
NM_013327.4	NP_037459.2	PARVB	63	1158	42	0	63	101	364	350
NM_014614.2	NP_055429.2	PSME4	56	5588	167	2	63	88	1843	34
NM_014715.3	NP_055530.2	ARHGAP32	379	5596	148	1	63	115	1738	31
NM_014743.2	NP_055558.2	KIAA0232	463	4651	28	1	63	29	1395	45
NM_015048.1	NP_055863.1	SETD1B	6	5778	102	0	63	35	1923	1889
NM_017549.4	NP_060019.2	EPDR1	379	1054	159	0	63	74	224	171
NM_018405.3	NP_060875.2	COPRS	108	663	153	0	63	64	184	133
NM_020210.3	NP_064595.2	SEMA4B	283	2797	15	0	63	89	837	832
NM_020945.1	NP_065996.1	WDFY4	77	9632	37	1	63	93	3184	44
NM_023072.2	NP_075560.2	ZSWIM4	189	3159	58	1	63	68	989	23
NM_024640.3	NP_078916.3	YRDC	13	853	27	0	63	83	279	270
NM_024886.2	NP_079162.1	C10orf95	75	849	137	2	63	104	257	213
NM_030753.4	NP_110380.1	WNT3	163	1231	195	0	63	88	355	290
NM_030893.3	NP_112155.2	CD1E	293	1460	114	0	63	52	388	350
NM_032137.4	NP_115513.4	C3orf20	452	3167	48	0	63	108	904	888
NM_032630.2	NP_116019.1	CINP	65	704	76	1	63	90	212	7
NM_032818.2	NP_116207.2	ARHGEF39	112	1120	260	2	63	99	335	16
NM_032936.3	NP_116325.1	TMEM60	227	629	6	0	63	100	133	131
NM_144949.2	NP_659198.1	SOCS5	252	1863	18	0	63	72	536	530
NM_145658.3	NP_663633.1	SPESP1	154	1207	35	2	63	119	350	15
NM_152343.2	NP_689556.2	SPATA32	96	1251	19	1	63	65	384	19
NM_153022.3	NP_694567.1	TMEM52B	633	1125	74	2	63	53	163	39
NM_153265.2	NP_694997.2	EML3	308	2999	87	0	63	75	896	867
NM_153837.3	NP_722579.1	ADGRG5	575	2162	52	1	63	126	528	10
NM_178548.3	NP_848643.2	TFAP2E	208	1537	24	0	63	69	442	434
NM_181845.1	NP_862828.1	ZNF283	268	2308	166	1	63	50	679	3
NM_182488.3	NP_872294.2	USP12	257	1370	12	0	63	100	370	366
NM_198570.4	NP_940972.2	VWC2	556	1534	18	0	63	112	325	319
NM_201648.2	NP_964011.2	GLYAT	155	1046	3	0	63	120	296	295
NM_000352.4	NP_000343.2	ABCC8	69	4815	149	2	64	43	1581	37
NM_000772.2	NP_000763.1	CYP2C18	326	1799	136	1	64	58	490	4
NM_000840.2	NP_000831.2	GRM3	1099	3739	6	0	64	121	879	877
NM_001004353.3	NP_001004353.2	STPG3	26	953	3	0	64	90	308	307
NM_001004439.1	NP_001004439.1	ITGA11	87	3654	72	0	64	81	1188	1164
NM_001012993.2	NP_001013011.2	C9orf152	554	1274	63	0	64	98	239	218
NM_001013635.3	NP_001013657.3	CCDC184	540	1125	24	0	64	111	194	186
NM_001013642.2	NP_001013664.1	TRNP1	83	767	87	0	64	60	227	198
NM_001039905.2	NP_001034994.1	C15orf56	21	507	62	2	64	74	161	61
NM_001079.3	NP_001070.2	ZAP70	207	2067	84	0	64	126	619	591
NM_001080478.2	NP_001073947.1	LRRC14B	28	1573	9	0	64	79	514	511
NM_001080529.2	NP_001073998.2	WIPF3	182	1634	346	1	64	100	483	1
NM_001098519.1	NP_001091989.1	LRRC43	25	1996	214	1	64	94	656	2
NM_001113402.1	NP_001106873.1	AMN1	166	943	38	2	64	58	258	16
NM_001114974.1	NP_001108446.1	SMTNL2	67	1453	102	0	64	87	461	427
NM_001127664.1	NP_001121136.1	GSN	299	2495	103	1	64	48	731	12
NM_001135050.1	NP_001128522.1	IGSF9	198	3738	157	1	64	52	1179	77
NM_001143936.1	NP_001137408.1	C15orf61	65	539	364	1	64	31	157	21
NM_001144.5	NP_001135.3	AMFR	211	2143	214	1	64	78	643	15
NM_001170880.1	NP_001164351.1	GPR137	415	1606	100	1	64	33	396	76
NM_001195125.1	NP_001182054.1	C16orf95	178	655	49	1	64	103	158	88
NM_001198954.1	NP_001185883.1	RNF103-CHMP3	243	999	78	0	64	101	251	225
NM_001288805.1	NP_001275734.1	ZNF707	955	2071	6	0	64	128	371	369
NM_001301159.1	NP_001288088.1	NHLRC4	658	1030	43	1	64	95	123	5
NM_001302084.1	NP_001289013.1	C11orf80	213	1749	99	0	64	91	511	478
NM_001317781.1	NP_001304710.1	SNX25	294	2817	61	1	64	61	840	29
NM_001318503.1	NP_001305432.1	DUSP9	258	1413	447	0	64	114	384	235
NM_001321178.1	NP_001308107.1	FAM156B	2456	3098	51	0	64	96	213	196
NM_001480.3	NP_001471.2	GALR1	497	1547	354	0	64	55	349	231
NM_001823.4	NP_001814.2	CKB	106	1252	87	0	64	101	381	352
NM_002653.4	NP_002644.4	PITX1	393	1338	21	0	64	75	314	307
NM_003696.2	NP_003687.2	OR6A2	200	1184	106	1	64	55	327	4
NM_004548.2	NP_004539.1	NDUFB10	109	628	22	1	64	79	172	19
NM_005156.6	NP_005147.3	PTBP3	187	1846	4	1	64	37	552	7
NM_005275.3	NP_005266.2	GNL1	1391	3215	82	1	64	104	607	28
NM_005389.2	NP_005380.2	PCMT1	33	891	174	0	64	105	285	227
NM_005528.3	NP_005519.2	DNAJC4	462	1188	106	1	64	76	241	43
NM_005904.3	NP_005895.1	SMAD7	287	1568	142	1	64	69	426	44
NM_006314.2	NP_006305.2	CNKSR1	58	2200	271	1	64	88	713	5
NM_006412.3	NP_006403.2	AGPAT2	102	939	177	0	64	85	278	219
NM_006586.4	NP_006577.2	CNPY3	441	1278	9	0	64	64	278	275
NM_006844.4	NP_006835.2	ILVBL	154	2053	157	1	64	105	632	9
NM_006886.3	NP_008817.1	ATP5F1E, ATP5E	116	272	73	1	64	103	51	2
NM_007040.5	NP_008971.2	HNRNPUL1	330	2901	4	1	64	47	856	4
NM_007109.2	NP_009040.2	TCF19	770	1808	121	1	64	85	345	55
NM_007332.2	NP_015628.2	TRPA1	175	3535	21	0	64	90	1119	1112
NM_012262.3	NP_036394.1	HS2ST1	385	1456	18	0	64	84	356	350
NM_013449.3	NP_038477.2	BAZ2A	194	5912	6	0	64	85	1905	1903
NM_014138.4	NP_054857.2	FAM156A	902	1544	51	0	64	96	213	196
NM_014188.2	NP_054907.1	SSU72	325	910	57	0	64	73	194	175
NM_014406.4	NP_055221.1	CCT8L2	260	1934	151	1	64	117	557	10
NM_014434.3	NP_055249.1	NDOR1	111	1905	55	1	64	96	597	27
NM_014819.4	NP_055634.3	PJA2	220	2347	33	0	64	79	708	697
NM_014845.5	NP_055660.1	FIG4	215	2939	52	1	64	38	907	8
NM_014891.6	NP_055706.1	PDAP1	134	680	133	1	64	100	181	13
NM_015162.4	NP_055977.3	ACSBG1	206	2381	51	0	64	90	724	707
NM_015565.2	NP_056380.2	LTN1	13	5452	138	0	64	100	1812	1766
NM_015627.2	NP_056442.2	LDLRAP1	114	1041	135	0	64	81	308	263
NM_018053.3	NP_060523.2	XKR8	608	1796	109	1	64	93	395	164
NM_018280.2	NP_060750.1	PRR34	51	468	367	1	64	78	138	27
NM_018366.2	NP_060836.1	BLOC1S4	95	749	19	1	64	88	217	82
NM_020147.3	NP_064532.1	THAP10	161	935	142	1	64	99	257	31
NM_020919.3	NP_065970.2	ALS2	356	5330	154	1	64	76	1657	4
NM_020956.2	NP_066007.1	PRX	269	713	254	2	64	76	147	46
NM_021140.3	NP_066963.2	KDM6A	377	4583	58	1	64	72	1401	21
NM_022497.4	NP_071942.1	MRPS25	143	665	6	0	64	75	173	171
NM_022725.3	NP_073562.1	FANCF	31	1156	151	1	64	107	374	29
NM_024675.3	NP_078951.2	PALB2	200	3761	227	2	64	84	1186	3
NM_024719.3	NP_078995.2	GRTP1	97	1108	134	2	64	66	336	102
NM_024885.3	NP_079161.3	TAF7L	26	1415	40	1	64	95	462	11
NM_024909.3	NP_079185.2	ATAT1	44	1046	16	1	64	69	333	16
NM_030930.3	NP_112192.2	UNC93B1	82	1876	27	0	64	97	597	588
NM_032777.9	NP_116166.9	ADGRA2	386	4403	21	0	64	92	1338	1331
NM_032853.3	NP_116242.2	PWWP3A, MUM1	110	2246	3	0	64	101	711	710
NM_033035.4	NP_149024.1	TSLP	199	679	22	1	64	51	159	15
NM_080826.1	NP_543016.1	ISM1	6	1401	355	1	64	113	464	10
NM_130784.3	NP_570140.1	SYCE1	123	972	6	0	64	96	282	280
NM_133639.3	NP_598378.3	RHOV	150	861	160	1	64	105	236	93
NM_144625.4	NP_653226.4	WDR64	207	3453	30	0	64	113	1081	1071
NM_144697.3	NP_653298.1	CIART	735	1893	124	1	64	80	385	64
NM_145252.2	NP_660295.2	ZG16B	76	703	36	0	64	85	208	196
NM_152263.3	NP_689476.2	TPM3	117	975	3	0	64	91	285	284
NM_152266.4	NP_689479.1	FAAP24	143	791	19	1	64	77	215	39
NM_152490.4	NP_689703.1	B3GALNT2	229	1732	151	1	64	108	500	3
NM_152503.5	NP_689716.4	MROH8	108	3267	270	0	64	83	1052	962
NM_152665.2	NP_689878.2	TCTEX1D1	131	671	3	0	64	95	179	178
NM_170783.3	NP_740753.1	POLR1H, ZNRD1	285	666	9	0	64	73	126	123
NM_173200.2	NP_775292.1	NR4A3	768	2682	4	1	64	58	637	40
NM_175733.3	NP_783860.1	SYT9	237	1713	303	0	64	53	491	390
NM_181871.3	NP_870986.1	PKLR	114	1746	99	0	64	113	543	510
NM_182647.3	NP_872588.1	OPRL1	455	1568	115	1	64	67	370	43
NM_198833.1	NP_942130.1	SERPINB8	169	1294	4	1	64	49	374	31
NM_207103.3	NP_996986.1	SCIMP	105	543	33	0	64	84	145	134
NM_207444.2	NP_997327.1	LINC02694, C15orf53	10	550	61	1	64	94	179	27
NM_000073.2	NP_000064.1	CD3G	80	629	100	1	65	39	182	10
NM_000278.4	NP_000269.3	PAX2	550	1735	6	0	65	89	394	392
NM_000660.6	NP_000651.3	TGFB1	839	2012	111	0	65	74	390	353
NM_000674.2	NP_000665.1	ADORA1	433	1414	124	1	65	70	326	77
NM_000804.3	NP_000795.2	FOLR3	65	803	6	0	65	128	245	243
NM_001001660.2	NP_001001660.2	ETFRF1, LYRM5	159	432	6	0	65	128	90	88
NM_001001922.2	NP_001001922.2	OR52N5	33	1008	20	2	65	109	324	15
NM_001004686.2	NP_001004686.1	OR2L2	96	1035	105	0	65	118	312	277
NM_001010903.4	NP_001010903.3	BNIP5, C6orf222	178	2137	306	0	65	96	652	550
NM_001012267.2	NP_001012267.1	CENPP	531	1398	146	2	65	81	288	42
NM_001025295.2	NP_001020466.1	IFITM5	36	435	270	0	65	71	132	42
NM_001033578.2	NP_001028750.1	SGK3	537	2028	18	0	65	71	496	490
NM_001040105.1	NP_001035194.1	MUC17	53	13535	18	0	65	102	4493	4487
NM_001040284.2	NP_001035374.2	TENT4B, PAPD5	35	2132	201	0	65	91	698	631
NM_001042463.2	NP_001035928.2	TMEM80	18	669	144	0	65	121	216	168
NM_001084393.1	NP_001077862.1	DDTL	77	482	141	0	65	116	134	87
NM_001099336.2	NP_001092806.1	C12orf42	265	1348	14	2	65	79	360	37
NM_001111307.1	NP_001104777.1	PDE4A	108	2769	205	1	65	64	886	109
NM_001130997.2	NP_001124469.1	CCNQ, FAM58A	104	791	102	0	65	97	228	194
NM_001197026.1	NP_001183955.1	PLEKHA8	402	1962	53	2	65	69	519	12
NM_001199021.1	NP_001185950.1	SPON2	625	1621	246	0	65	81	331	249
NM_001200049.2	NP_001186978.2	CFAP46	101	8249	49	1	65	115	2715	4
NM_001204173.1	NP_001191102.1	C8orf44-SGK3	631	2122	18	0	65	71	496	490
NM_001258018.1	NP_001244947.1	IL4I1	621	2391	10	1	65	102	589	6
NM_001271893.3	NP_001258822.1	TWIST2	184	667	124	1	65	122	160	59
NM_001271970.1	NP_001258899.1	HSP90AB1	179	2354	19	1	65	75	724	36
NM_001279.3	NP_001270.1	CIDEA	65	725	19	1	65	102	219	8
NM_001286059.1	NP_001272988.1	RAB30	406	1018	6	0	65	88	203	201
NM_001286233.1	NP_001273162.1	SLC2A14	975	2538	13	1	65	87	520	14
NM_001287757.1	NP_001274686.1	DCUN1D4	586	1285	37	1	65	95	232	21
NM_001319296.1	NP_001306225.1	ASB8	306	1173	12	0	65	104	288	284
NM_001355.3	NP_001346.1	DDT	128	485	141	0	65	116	118	71
NM_001412.3	NP_001403.1	EIF1AX	208	643	49	1	65	73	144	21
NM_001525.2	NP_001516.2	HCRTR1	385	1663	30	0	65	96	425	415
NM_001649.3	NP_001640.1	SHROOM2	90	4941	214	1	65	82	1616	21
NM_001896.2	NP_001887.1	CSNK2A2	142	1195	112	1	65	109	350	30
NM_002018.3	NP_002009.1	FLII	226	4036	82	1	65	96	1269	4
NM_002234.3	NP_002225.2	KCNA5	229	2071	39	0	65	94	613	600
NM_002378.3	NP_002369.2	MATK	338	1865	126	0	65	77	508	466
NM_003371.3	NP_003362.2	VAV2	46	2566	195	0	65	82	839	774
NM_003670.2	NP_003661.1	BHLHE40	307	1546	81	0	65	95	412	385
NM_003687.3	NP_003678.2	PDLIM4	77	1070	97	1	65	47	330	15
NM_003721.3	NP_003712.1	RFXANK	505	1288	97	1	65	111	260	17
NM_003828.3	NP_003819.1	MTMR1	167	2165	160	1	65	74	665	8
NM_004204.3	NP_004195.2	PIGQ	138	1884	268	1	65	80	581	79
NM_004237.3	NP_004228.1	TRIP13	145	1444	170	2	65	70	432	2
NM_004260.3	NP_004251.3	RECQL4	42	3669	469	1	65	78	1208	22
NM_004273.4	NP_004264.2	CHST3	440	1880	57	0	65	88	479	460
NM_004295.3	NP_004286.2	TRAF4	108	1521	72	0	65	63	470	446
NM_004444.4	NP_004435.3	EPHB4	491	3455	145	1	65	52	987	110
NM_004681.3	NP_004672.2	EIF1AY	161	596	49	1	65	70	144	21
NM_004826.3	NP_004817.2	ECEL1	242	2570	34	1	65	92	775	8
NM_005151.3	NP_005142.1	USP14	216	1701	26	2	65	113	494	6
NM_005477.2	NP_005468.1	HCN4	994	4606	21	0	65	48	1203	1196
NM_005562.2	NP_005553.2	LAMC2	314	3896	91	1	65	109	1193	77
NM_005601.3	NP_005592.1	NKG7	171	669	48	0	65	88	165	149
NM_005675.4	NP_005666.2	DGCR6	152	815	408	0	65	67	220	84
NM_005744.3	NP_005735.2	ARIH1	314	1988	109	1	65	99	557	108
NM_005924.4	NP_005915.2	MEOX2	281	1196	88	1	65	59	304	19
NM_005984.4	NP_005975.1	SLC25A1	190	1126	232	1	65	105	311	70
NM_006161.2	NP_006152.2	NEUROG1	259	973	312	0	65	57	237	133
NM_006184.5	NP_006175.2	NUCB1	334	1720	178	1	65	86	461	25
NM_006456.2	NP_006447.2	ST6GALNAC2	255	1380	334	1	65	88	374	14
NM_006474.4	NP_006465.3	PDPN	49	766	228	0	65	72	238	162
NM_006645.2	NP_006636.2	STARD10	944	1820	76	1	65	85	291	19
NM_006825.3	NP_006816.2	CKAP4	84	1893	88	1	65	86	602	146
NM_006858.3	NP_006849.1	TMED1	116	800	3	0	65	109	227	226
NM_007179.2	NP_009110.2	INSL6	16	658	139	1	65	72	213	17
NM_012177.4	NP_036309.1	FBXO5	123	1467	138	0	65	92	447	401
NM_013239.4	NP_037371.2	PPP2R3B	264	1992	36	0	65	98	575	563
NM_013355.4	NP_037487.2	PKN3	412	3082	52	1	65	78	889	4
NM_014368.4	NP_055183.2	LHX6	72	1251	13	1	65	77	392	24
NM_014851.3	NP_055666.2	KLHL21	81	1875	189	0	65	93	597	534
NM_015075.1	NP_055890.1	IQSEC2	93	2943	84	0	65	71	949	921
NM_015140.3	NP_055955.1	TTLL12	62	1997	207	0	65	119	644	575
NM_015478.6	NP_056293.4	L3MBTL1	109	2428	19	1	65	108	772	26
NM_015985.3	NP_057069.1	ANGPT4	120	1632	18	0	65	106	503	497
NM_016492.4	NP_057576.2	RANGRF	138	699	57	0	65	91	186	167
NM_016545.4	NP_057629.2	IER5	401	1385	780	0	65	83	327	67
NM_017707.3	NP_060177.2	ASAP3	124	2836	90	0	65	75	903	873
NM_018322.2	NP_060792.1	SAYSD1	97	649	158	2	65	61	183	3
NM_018369.2	NP_060839.2	DEPDC1B	73	1663	52	1	65	80	529	39
NM_019087.2	NP_061960.1	ARL15	94	709	36	0	65	46	204	192
NM_020167.4	NP_064552.3	NMUR2	166	1414	9	0	65	79	415	412
NM_020798.2	NP_065849.1	USP35	356	3413	732	0	65	65	1018	774
NM_020897.2	NP_065948.1	HCN3	164	2489	297	0	65	106	774	675
NM_020936.2	NP_065987.1	DDX55	72	1875	7	1	65	82	600	1
NM_021008.3	NP_066288.2	DEAF1	707	2405	204	0	65	111	565	497
NM_021932.5	NP_068751.4	RIC8A	1344	2958	46	1	65	94	537	1
NM_021965.3	NP_068800.2	PGM5	229	1933	183	0	65	75	567	506
NM_022115.4	NP_071398.3	PRDM15	111	4635	128	2	65	64	1507	89
NM_022783.3	NP_073620.2	DEPTOR	192	1422	87	0	65	86	409	380
NM_024009.2	NP_076872.1	GJB3	615	1428	136	1	65	78	270	221
NM_024031.3	NP_076936.1	PRR14	311	2069	71	2	65	114	585	139
NM_024045.1	NP_076950.1	DDX50	107	2321	30	0	65	90	737	727
NM_024074.2	NP_076979.1	TMEM38A	91	991	115	1	65	91	299	38
NM_024089.2	NP_076994.2	POGLUT2, KDELC1	384	1893	101	2	65	97	502	26
NM_030923.4	NP_112185.1	TMEM163	66	936	333	0	65	80	289	178
NM_030973.3	NP_112235.2	MED25	63	2307	142	1	65	44	747	165
NM_031886.2	NP_114092.2	KCNA7	356	1727	571	1	65	88	456	50
NM_032192.3	NP_115568.2	PPP1R1B	469	1084	78	0	65	99	204	178
NM_033051.3	NP_149040.3	SLC46A2	232	1660	109	1	65	96	475	7
NM_033124.4	NP_149115.2	CCDC65	227	1682	18	0	65	96	484	478
NM_033257.3	NP_150282.2	DGCR6L	117	780	408	0	65	67	220	84
NM_033402.4	NP_208325.3	LRRCC1	208	3307	73	1	65	102	1032	16
NM_053023.4	NP_444251.1	ZFP91	168	1881	341	2	65	56	570	7
NM_058219.2	NP_478126.1	EXOSC6	30	849	525	0	65	99	272	97
NM_133459.3	NP_597716.1	CCBE1	70	1291	203	2	65	66	406	10
NM_138345.2	NP_612354.1	VWA5B2	100	3829	387	0	65	90	1242	1113
NM_148965.1	NP_683866.1	TNFRSF25	88	1369	263	2	65	63	426	7
NM_152358.2	NP_689571.2	IZUMO2	87	753	171	0	65	85	221	164
NM_152406.3	NP_689619.1	AFAP1L1	131	2438	102	0	65	125	768	734
NM_152485.3	NP_689698.1	C1orf74	428	1238	18	0	65	78	269	263
NM_152486.2	NP_689699.2	SAMD11	80	2126	163	1	65	82	681	16
NM_152536.3	NP_689749.3	FGD5	110	4499	82	1	65	73	1462	3
NM_152654.2	NP_689867.1	DAND5	43	613	219	0	65	106	189	116
NM_152679.3	NP_689892.1	SLC10A4	219	1533	70	1	65	66	437	77
NM_153334.6	NP_699165.3	SCARF2	105	2721	105	0	65	35	871	836
NM_153357.1	NP_699188.1	SLC16A11	338	1754	47	2	65	94	471	48
NM_172027.2	NP_742024.1	ABTB1	88	1525	40	1	65	88	478	15
NM_173587.3	NP_775858.2	RCOR2	388	1960	12	0	65	76	523	519
NM_173667.3	NP_775938.1	C5orf64	103	496	20	2	65	35	130	4
NM_175861.3	NP_787057.2	TMTC1	474	2799	19	1	65	43	774	2
NM_182626.3	NP_872432.1	RRM2, C2orf48	289	769	43	1	65	79	159	11
NM_182832.2	NP_878252.2	PLAC4	5611	6064	49	1	65	84	150	11
NM_183241.2	NP_899064.1	PAXX, C9orf142	26	641	604	1	65	67	204	23
NM_198253.2	NP_937983.2	TERT	58	3457	593	2	65	67	1132	7
NM_198439.2	NP_940841.1	KBTBD3	640	2479	12	0	65	68	612	608
NM_198469.3	NP_940871.2	MORN5	65	551	34	1	65	94	161	1
NM_198475.2	NP_940877.2	FAM171A2	153	2634	142	1	65	36	826	1
NM_201523.2	NP_958931.1	KLC4	353	2267	54	0	65	85	637	619
NM_000117.2	NP_000108.1	EMD	248	1013	208	1	66	93	254	51
NM_000196.3	NP_000187.3	HSD11B2	116	1334	312	0	66	89	405	301
NM_000240.3	NP_000231.1	MAOA	1435	3019	36	0	66	83	527	515
NM_000328.2	NP_000319.1	RPGR	168	2616	21	0	66	58	815	808
NM_000735.3	NP_000726.1	CGA	142	493	19	1	66	110	116	58
NM_001001479.3	NP_001001479.1	SLC35E4	636	1689	25	1	66	99	350	4
NM_001001557.3	NP_001001557.1	GDF6	100	1468	126	0	66	72	455	413
NM_001001794.3	NP_001001794.3	DENND6B	72	1830	291	0	66	58	585	488
NM_001005270.4	NP_001005270.3	OR4C12	34	964	16	1	66	72	309	1
NM_001006681.1	NP_001006682.1	SPIN2B	311	1088	78	0	66	93	258	232
NM_001008739.1	NP_001008739.1	C6orf226	28	334	23	2	66	85	101	59
NM_001009552.1	NP_001009552.1	PPP2CB	415	1345	130	1	66	78	309	43
NM_001009984.2	NP_001009984.1	C20orf194	105	3639	142	1	66	81	1177	6
NM_001010855.3	NP_001010855.1	PIK3R6	240	2505	13	1	66	80	754	75
NM_001010940.2	NP_001010940.1	C9orf135	75	765	184	1	66	70	229	2
NM_001010977.2	NP_001010977.1	METTL21C	23	818	285	0	66	108	264	169
NM_001017395.4	NP_001017395.2	TMCC1	517	2479	61	1	66	120	653	16
NM_001018024.2	NP_001018024.1	CMC4	589	796	47	2	66	114	68	20
NM_001039395.3	NP_001034484.3	SPATA6L	246	1251	76	1	66	88	334	8
NM_001053.3	NP_001044.1	SSTR5	88	1183	210	0	66	103	364	294
NM_001070.4	NP_001061.2	TUBG1	398	1754	85	1	66	82	451	44
NM_001077624.1	NP_001071092.1	ZNF846	531	2133	34	1	66	89	533	24
NM_001079827.2	NP_001073296.1	CLRN2	102	801	8	2	66	46	232	66
NM_001098797.1	NP_001092267.1	TOX2	40	1561	103	1	66	37	506	8
NM_001101320.1	NP_001094790.1	SERPINE3	60	1335	55	1	66	123	424	7
NM_001130015.1	NP_001123487.1	ANKRD33	579	1398	8	2	66	41	272	18
NM_001142684.1	NP_001136156.1	ZMYM5	265	2275	8	2	66	102	669	9
NM_001193425.1	NP_001180354.1	SUV39H2	244	1297	20	2	66	87	350	27
NM_001194995.1	NP_001181924.1	C12orf65	472	973	47	2	66	72	166	40
NM_001204848.1	NP_001191777.1	TNFAIP8L2-SCNM1	148	736	10	1	66	79	195	20
NM_001220500.1	NP_001207429.1	FCER2	217	1183	234	0	66	117	321	243
NM_001242729.1	NP_001229658.1	ARHGEF38	146	2480	33	0	66	73	777	766
NM_001251962.1	NP_001238891.1	ARHGEF26	284	2900	277	1	66	58	871	40
NM_001281293.1	NP_001268222.1	ZNF281	131	2819	123	0	66	77	895	854
NM_001288837.1	NP_001275766.1	VRK2	745	2272	16	1	66	83	508	36
NM_001289933.1	NP_001276862.1	LDB3, ZASP	177	684	13	1	66	51	168	33
NM_001291324.1	NP_001278253.1	BAHCC1	19	7939	4	1	66	88	2639	62
NM_001300.5	NP_001291.3	KLF6	267	1119	15	0	66	85	283	278
NM_001317056.1	NP_001303985.1	ATG9B	76	2851	12	0	66	94	924	920
NM_001321356.1	NP_001308285.1	ZNF667	791	2624	86	2	66	134	610	10
NM_001349.3	NP_001340.2	DARS1, DARS	216	1722	51	0	66	86	501	484
NM_001521.3	NP_001512.1	GTF3C2	396	3132	22	1	66	97	911	12
NM_001553.2	NP_001544.1	IGFBP7	34	883	183	0	66	73	282	221
NM_001789.2	NP_001780.2	CDC25A	364	1939	144	0	66	83	524	476
NM_001893.4	NP_001884.2	CSNK1D	337	1585	119	2	66	52	415	11
NM_002081.2	NP_002072.2	GPC1	221	1898	32	2	66	83	558	45
NM_002141.4	NP_002132.3	HOXA4	47	1010	6	0	66	95	320	318
NM_002333.3	NP_002324.2	LRP3	93	2406	246	0	66	83	770	688
NM_002431.3	NP_002422.1	MNAT1	122	1052	63	0	66	52	309	288
NM_002446.3	NP_002437.2	MAP3K10	288	3153	519	0	66	76	954	781
NM_002973.3	NP_002964.3	ATXN2	162	4104	466	1	66	37	1313	7
NM_003038.4	NP_003029.2	SLC1A4	283	1882	240	0	66	95	532	452
NM_003132.2	NP_003123.2	SRM	91	1000	175	1	66	90	302	23
NM_003162.3	NP_003153.2	STRN	9	2352	309	0	66	118	780	677
NM_003419.4	NP_003410.1	ZNF345	381	1848	56	2	66	99	488	1
NM_003466.3	NP_003457.1	PAX8	166	1519	28	1	66	73	450	3
NM_003681.4	NP_003672.1	PDXK	198	1137	145	1	66	64	312	8
NM_003824.3	NP_003815.1	FADD	297	924	77	2	66	53	208	75
NM_003827.3	NP_003818.2	NAPA	318	1206	30	0	66	117	295	285
NM_003842.4	NP_003833.4	TNFRSF10B	293	1616	295	1	66	81	440	27
NM_004228.6	NP_004219.3	CYTH2	300	1500	16	1	66	58	399	5
NM_004364.4	NP_004355.2	CEBPA	150	1227	42	0	66	83	358	344
NM_004641.3	NP_004632.1	MLLT10	349	3433	51	0	66	66	1027	1010
NM_004653.4	NP_004644.2	KDM5D	288	4908	217	1	66	79	1539	8
NM_004833.2	NP_004824.1	AIM2	289	1321	55	1	66	73	343	29
NM_004977.2	NP_004968.2	KCNC3	295	2569	203	2	66	74	757	31
NM_005044.4	NP_005035.1	PRKX	381	1458	237	0	66	78	358	279
NM_005219.4	NP_005210.3	DIAPH1	141	3960	70	1	66	84	1272	17
NM_005827.2	NP_005818.2	SLC35B1	7	1087	25	1	66	79	359	17
NM_005834.4	NP_005825.1	TIMM17B	149	668	29	2	66	99	172	5
NM_005907.3	NP_005898.2	MAN1A1	447	2409	603	0	66	92	653	452
NM_005922.3	NP_005913.2	MAP3K4	205	5032	63	0	66	66	1608	1587
NM_006244.3	NP_006235.1	PPP2R5B	622	2116	199	1	66	79	497	10
NM_006281.3	NP_006272.2	STK3	141	1617	82	1	66	56	491	2
NM_006282.4	NP_006273.1	STK4	99	1563	52	1	66	33	487	4
NM_006826.3	NP_006817.1	YWHAQ	197	935	63	0	66	109	245	224
NM_007370.6	NP_031396.1	RFC5	167	1190	94	1	66	44	340	9
NM_014009.3	NP_054728.2	FOXP3	188	1484	163	1	66	56	431	6
NM_014432.3	NP_055247.3	IL20RA	452	2114	147	0	66	98	553	504
NM_014615.4	NP_055430.1	GSE1	262	3916	9	0	66	71	1217	1214
NM_014685.3	NP_055500.1	HERPUD1	155	1331	200	2	66	90	391	35
NM_015163.5	NP_055978.4	TRIM9	765	2898	9	0	66	83	710	707
NM_015164.3	NP_055979.2	PLEKHM2	256	3316	80	2	66	44	1019	1
NM_015379.4	NP_056194.1	BRI3	129	507	347	2	66	77	125	25
NM_015466.3	NP_056281.1	PTPN23	115	5026	18	0	66	51	1636	1630
NM_015721.2	NP_056536.2	GEMIN4	119	3296	33	0	66	98	1058	1047
NM_015927.4	NP_057011.2	TGFB1I1	84	1419	61	1	66	79	444	55
NM_015997.3	NP_057081.3	RRNAD1	634	2062	31	1	66	67	475	6
NM_016086.2	NP_057170.1	STYXL1	343	1285	17	2	66	43	313	1
NM_016095.2	NP_057179.1	GINS2	84	642	170	2	66	81	185	20
NM_016170.4	NP_057254.1	TLX2	338	1193	12	0	66	76	284	280
NM_017431.2	NP_059127.2	PRKAG3	19	1489	75	0	66	84	489	464
NM_017629.3	NP_060099.2	AGO4	190	2776	127	1	66	64	861	21
NM_017712.3	NP_060182.1	PGPEP1	95	725	127	1	66	51	209	95
NM_018181.5	NP_060651.2	ZNF532	776	4682	6	0	66	110	1301	1299
NM_018354.2	NP_060824.1	TMEM74B	672	1443	19	1	66	79	256	26
NM_018410.4	NP_060880.3	HJURP	66	2313	21	0	66	65	748	741
NM_018420.2	NP_060890.2	SLC22A15	130	1774	36	0	66	98	547	535
NM_018843.3	NP_061331.2	SLC25A40	375	1392	54	0	66	75	338	320
NM_019014.5	NP_061887.2	POLR1B	580	3988	70	1	66	41	1135	14
NM_019082.3	NP_061955.1	DDX56	643	2287	33	0	66	90	547	536
NM_019099.4	NP_061972.1	INKA2, FAM212B	182	1076	6	0	66	83	297	295
NM_020135.2	NP_064520.2	WRNIP1	191	2189	75	0	66	66	665	640
NM_020476.2	NP_065209.2	ANK1	84	5730	31	1	66	57	1881	6
NM_020772.2	NP_065823.1	NUFIP2	89	2177	178	1	66	77	695	13
NM_021214.1	NP_067037.1	ABHD17C	119	1109	21	0	66	102	329	322
NM_021217.2	NP_067040.1	ZNF77	131	1769	67	1	66	98	545	9
NM_024294.3	NP_077270.1	ILRUN, C6orf106	247	1144	9	0	66	73	298	295
NM_024884.2	NP_079160.1	L2HGDH	79	1471	335	2	66	84	463	9
NM_025203.2	NP_079479.1	WDCP	131	2297	40	1	66	46	721	22
NM_030648.3	NP_085151.1	SETD7	632	1733	18	0	66	81	366	360
NM_030928.3	NP_112190.2	CDT1	54	1695	374	2	66	79	546	34
NM_030958.2	NP_112220.2	SLCO5A1	707	3254	336	0	66	91	848	736
NM_032110.2	NP_115486.1	DMRTA2	340	1969	226	1	66	97	542	138
NM_032296.2	NP_115672.2	FLYWCH1	363	2511	151	1	66	87	715	45
NM_032302.3	NP_115678.1	PSMG3	654	1023	123	0	66	99	122	81
NM_032515.4	NP_115904.1	BOK	292	931	42	0	66	86	212	198
NM_032790.3	NP_116179.2	ORAI1	193	1099	189	0	66	79	301	238
NM_033280.3	NP_150596.1	SEC11C	92	671	72	0	66	94	192	168
NM_033520.2	NP_277055.1	C19orf33	101	422	193	1	66	69	106	1
NM_033644.2	NP_387448.2	FBXW11	371	1961	42	0	66	72	529	515
NM_053275.3	NP_444505.1	RPLP0	237	1191	64	1	66	22	317	32
NM_057175.4	NP_476516.1	NAA15	311	2912	31	1	66	95	866	7
NM_130830.4	NP_570843.2	LRRC15	86	1832	67	1	66	115	581	33
NM_133171.4	NP_573403.1	ELMO2	629	2792	115	1	66	100	720	49
NM_133261.2	NP_573568.1	GIPC3	27	966	261	0	66	108	312	225
NM_138387.3	NP_612396.1	G6PC3	236	1277	253	1	66	58	346	31
NM_138439.2	NP_612448.1	FLYWCH2	371	794	195	0	66	86	140	75
NM_138442.3	NP_612451.1	CCDC124	107	779	79	1	66	51	223	20
NM_139045.3	NP_620614.2	SMARCA2	222	4941	27	0	66	72	1572	1563
NM_144666.2	NP_653267.2	DNHD1	564	14826	37	1	66	64	4753	33
NM_145232.3	NP_660275.2	CTU1	65	1112	28	1	66	79	348	158
NM_145256.2	NP_660299.2	LRRC25	642	1560	17	2	66	61	305	60
NM_152349.2	NP_689562.1	KRT222	65	953	22	1	66	74	295	15
NM_152791.4	NP_690004.4	ZNF555	138	2025	22	1	66	89	628	24
NM_152833.2	NP_690046.3	TMEM250, C9orf69	525	945	9	0	66	68	139	136
NM_153015.2	NP_694560.1	TMEM74	179	1097	49	1	66	63	305	76
NM_177533.4	NP_803877.2	NUDT14	114	783	82	1	66	85	222	9
NM_178424.1	NP_848511.1	SOX30	342	2604	99	0	66	78	753	720
NM_178466.4	NP_848561.2	BPIFA3	227	992	3	0	66	82	254	253
NM_181489.5	NP_852466.1	ZNF445	348	3444	19	1	66	68	1031	19
NM_182581.3	NP_872387.2	SPATA46, C1orf111	64	850	75	0	66	121	261	236
NM_194071.3	NP_919047.2	CREB3L2	396	1959	90	0	66	108	520	490
NM_198398.1	NP_938408.1	ERGIC3	69	1236	31	1	66	53	388	19
NM_203422.3	NP_981967.1	LRRN4CL	478	1195	100	1	66	76	238	97
NM_207363.2	NP_997246.2	NCKAP5	374	6104	75	0	66	60	1909	1884
NM_000033.3	NP_000024.2	ABCD1	399	2637	79	1	67	41	745	40
NM_000223.3	NP_000214.1	KRT12	24	1509	21	0	67	79	494	487
NM_000342.3	NP_000333.1	SLC4A1	149	2885	16	1	67	97	911	5
NM_000382.2	NP_000373.1	ALDH3A2	221	1679	96	0	67	81	485	453
NM_000698.4	NP_000689.1	ALOX5	114	2139	232	1	67	72	674	5
NM_000744.6	NP_000735.1	CHRNA4	231	2115	85	1	67	82	627	12
NM_000870.6	NP_000861.1	HTR4	513	1680	13	1	67	44	388	3
NM_000899.4	NP_000890.1	KITLG	195	1017	106	1	67	100	273	1
NM_001003811.1	NP_001003811.1	TEX11	162	2985	106	1	67	89	940	17
NM_001005210.2	NP_001005210.1	LRRC55	147	1173	38	2	67	98	341	1
NM_001008391.3	NP_001008392.2	CCDC73	61	3301	126	0	67	44	1079	1037
NM_001008536.1	NP_001008536.1	TCHHL1	65	2780	19	1	67	83	904	4
NM_001020818.2	NP_001018654.1	MYADM	450	1419	69	0	67	78	322	299
NM_001037331.3	NP_001032408.1	SMIM21	140	446	10	1	67	99	101	10
NM_001039775.3	NP_001034864.2	CRYBG2, AIM1L	150	5136	21	0	67	90	1661	1654
NM_001071.2	NP_001062.1	TYMS	139	1081	180	0	67	97	313	253
NM_001080481.1	NP_001073950.1	USP45	533	2978	70	1	67	67	814	10
NM_001080521.2	NP_001073990.2	RASSF10	154	1678	175	1	67	91	507	69
NM_001085437.2	NP_001078906.2	MAB21L4, C2orf54	159	1503	30	0	67	112	447	437
NM_001098728.1	NP_001092198.1	GTF2H2C	213	1401	4	1	67	35	395	32
NM_001102651.1	NP_001096121.1	ZNF554	198	1815	93	0	67	125	538	507
NM_001114107.4	NP_001107579.1	PDLIM3	124	1075	139	1	67	86	316	13
NM_001129994.1	NP_001123466.1	KCTD15	268	1120	78	0	67	71	283	257
NM_001135746.2	NP_001129218.1	NEIL2	169	1168	142	1	67	49	332	10
NM_001136156.1	NP_001129628.1	ZNF507	272	3134	24	0	67	102	953	945
NM_001136196.1	NP_001129668.1	TNPO2	185	2879	175	1	67	87	897	15
NM_001136509.1	NP_001129981.1	ZNF843	727	1774	463	1	67	72	348	259
NM_001164837.2	NP_001158309.1	FXYD6	521	809	42	0	67	62	95	81
NM_001170331.1	NP_001163802.1	LANCL3	302	1565	34	1	67	98	420	181
NM_001172430.1	NP_001165901.1	AMPD3	299	2603	40	1	67	33	767	66
NM_001173524.1	NP_001166995.1	RO60, TROVE2	376	1993	21	0	67	94	538	531
NM_001174084.1	NP_001167555.1	POLL	495	2223	49	1	67	41	575	24
NM_001196.3	NP_001187.1	BID	173	761	37	1	67	77	195	59
NM_001199165.3	NP_001186094.1	CEP112	243	3111	26	2	67	98	955	8
NM_001206744.1	NP_001193673.1	TPO	86	2888	36	0	67	102	933	921
NM_001256071.2	NP_001243000.2	RNF213	150	15774	22	1	67	81	5207	23
NM_001256155.2	NP_001243084.2	ARMCX4	202	7075	121	1	67	79	2290	19
NM_001256829.1	NP_001243758.1	TMEM265	520	847	141	0	67	120	108	61
NM_001276501.1	NP_001263430.1	GPSM3	402	885	31	1	67	77	160	82
NM_001301851.1	NP_001288780.1	LOC403312	115	706	231	0	67	78	196	119
NM_001315494.1	NP_001302423.1	LOC101929726	52	307	132	0	67	80	84	40
NM_001317091.1	NP_001304020.1	NPY5R	1522	2860	91	1	67	93	445	6
NM_001319657.1	NP_001306586.1	LOC102724265	119	425	6	0	67	90	101	99
NM_001427.3	NP_001418.2	EN2	249	1251	10	1	67	106	333	44
NM_001515.3	NP_001506.1	GTF2H2	210	1398	4	1	67	35	395	32
NM_001973.3	NP_001964.2	ELK4	1250	2546	66	0	67	66	431	409
NM_002215.3	NP_002206.2	ITIH1	30	2766	12	0	67	95	911	907
NM_002351.4	NP_002342.1	SH2D1A	361	748	22	1	67	122	128	23
NM_002744.5	NP_002735.3	PRKCZ	161	1940	24	0	67	82	592	584
NM_002811.4	NP_002802.2	PSMD7	140	1115	125	2	67	115	324	6
NM_003453.4	NP_003444.1	ZMYM2	298	4432	69	0	67	118	1377	1354
NM_003565.2	NP_003556.1	ULK1	268	3421	214	1	67	92	1050	38
NM_003593.2	NP_003584.2	FOXN1	29	1976	81	0	67	99	648	621
NM_004176.4	NP_004167.3	SREBF1	194	3638	93	0	67	102	1147	1116
NM_004213.4	NP_004204.3	SLC28A1	223	2173	69	0	67	100	649	626
NM_004284.5	NP_004275.4	CHD1L	63	2757	193	1	67	116	897	27
NM_004431.4	NP_004422.2	EPHA2	177	3108	142	1	67	92	976	6
NM_004533.3	NP_004524.3	MYBPC2	51	3477	46	1	67	67	1141	39
NM_004574.4	NP_004565.1	SEPTIN4, SEPT4	293	1730	17	2	67	114	478	7
NM_004599.3	NP_004590.2	SREBF2	192	3618	36	0	67	75	1141	1129
NM_004878.4	NP_004869.1	PTGES	53	512	21	0	67	73	152	145
NM_004923.3	NP_004914.2	TESMIN	140	1667	43	1	67	82	508	3
NM_004975.3	NP_004966.1	KCNB1	164	2741	12	0	67	103	858	854
NM_005007.3	NP_004998.3	NFKBIL1	119	1265	69	0	67	90	381	358
NM_005201.3	NP_005192.1	CCR8	138	1206	76	1	67	61	355	40
NM_005479.3	NP_005470.2	FRAT1	189	1029	448	1	67	82	279	56
NM_005500.2	NP_005491.1	SAE1	108	1149	55	1	67	107	346	25
NM_005622.3	NP_005613.2	ACSM3	187	1948	24	0	67	110	586	578
NM_005626.4	NP_005617.2	SRSF4	373	1858	49	1	67	83	494	16
NM_006157.4	NP_006148.2	NELL1	173	2606	6	0	67	67	810	808
NM_006245.3	NP_006236.1	PPP2R5D	179	1988	47	2	67	102	602	5
NM_006392.3	NP_006383.2	NOP56	129	1914	187	1	67	79	594	45
NM_006636.3	NP_006627.2	MTHFD2	79	1132	18	0	67	82	350	344
NM_006768.4	NP_006759.3	BRAP	204	1983	90	0	67	79	592	562
NM_006998.3	NP_008929.2	SCGN	203	1034	73	1	67	40	276	7
NM_007026.3	NP_008957.1	DUSP14	294	891	39	0	67	98	198	185
NM_012083.2	NP_036215.1	FRAT2	129	831	440	2	67	137	233	74
NM_012285.2	NP_036417.1	KCNH4	333	3387	9	0	67	83	1017	1014
NM_013299.3	NP_037431.3	SAC3D1	389	1466	39	0	67	81	358	345
NM_013448.2	NP_038476.2	BAZ1A	568	5239	112	1	67	108	1556	18
NM_014051.3	NP_054770.1	TMEM14A	176	476	22	1	67	76	99	4
NM_014272.4	NP_055087.2	ADAMTS7	243	5304	211	1	67	100	1686	24
NM_014296.2	NP_055111.1	CAPN7	270	2712	124	1	67	27	813	8
NM_014473.3	NP_055288.1	DIMT1	188	1130	84	0	67	93	313	285
NM_014564.4	NP_055379.1	LHX3	134	1343	414	0	67	65	402	264
NM_014790.4	NP_055605.2	JAKMIP2	541	2974	67	1	67	74	810	12
NM_014909.4	NP_055724.1	VASH1	930	2028	124	1	67	86	365	108
NM_014963.2	NP_055778.2	SBNO2	238	4339	21	0	67	66	1366	1359
NM_014972.2	NP_055787.1	TCF25	82	2113	88	1	67	95	676	34
NM_015153.3	NP_055968.1	PHF3	26	6146	49	1	67	51	2039	5
NM_015320.3	NP_056135.2	ARHGEF4	519	2592	63	0	67	69	690	669
NM_015351.1	NP_056166.1	TTC9	343	1012	436	1	67	92	222	11
NM_015395.2	NP_056210.1	TECPR1	300	3798	78	0	67	83	1165	1139
NM_015900.3	NP_056984.1	PLA1A	66	1437	76	1	67	78	456	40
NM_016235.2	NP_057319.1	GPRC5B	186	1398	24	0	67	83	403	395
NM_016269.4	NP_057353.1	LEF1	1189	2389	66	0	67	100	399	377
NM_016437.2	NP_057521.1	TUBG2	256	1612	85	1	67	82	451	44
NM_016593.4	NP_057677.2	CYP39A1	248	1658	178	1	67	91	469	13
NM_017573.4	NP_060043.2	PCSK4	104	2372	100	1	67	76	755	49
NM_017822.3	NP_060292.3	KANSL2	75	1554	101	2	67	45	492	13
NM_017971.3	NP_060441.2	MRPL20	96	546	155	2	67	104	149	17
NM_018438.5	NP_060908.1	FBXO6	166	1048	4	1	67	32	293	33
NM_018665.2	NP_061135.2	DDX43	344	2291	357	0	67	90	648	529
NM_018847.3	NP_061335.1	KLHL9	573	2427	27	0	67	95	617	608
NM_018965.3	NP_061838.1	TREM2	104	797	112	1	67	93	230	3
NM_018986.4	NP_061859.3	SH3TC1	190	4201	42	0	67	89	1336	1322
NM_019854.4	NP_062828.3	PRMT8	428	1613	6	0	67	84	394	392
NM_020145.3	NP_064530.1	SH3GLB2	199	1387	12	0	67	98	395	391
NM_020162.3	NP_064547.2	DHX33	201	2325	99	0	67	86	707	674
NM_020442.5	NP_065175.4	VARS2	164	3356	103	1	67	59	1063	27
NM_020761.2	NP_065812.1	RPTOR	805	4813	12	0	67	100	1335	1331
NM_020939.1	NP_065990.1	CPNE5	67	1849	18	0	67	125	593	587
NM_021823.4	NP_068595.3	PPCDC	144	759	39	0	67	54	204	191
NM_022098.3	NP_071381.1	XPNPEP3	101	1625	65	2	67	117	507	108
NM_022162.2	NP_071445.1	NOD2	105	3228	31	1	67	96	1040	179
NM_024296.4	NP_077272.2	CCDC28B	347	950	4	1	67	47	200	37
NM_024575.4	NP_078851.2	TNFAIP8L2	126	681	60	0	67	121	184	164
NM_024583.4	NP_078859.2	SCRN3	98	1373	91	1	67	59	424	12
NM_024686.5	NP_078962.4	TTLL7	433	3097	81	0	67	94	887	860
NM_024821.3	NP_079097.1	CCDC134	161	851	51	0	67	98	229	212
NM_031916.4	NP_114122.2	ROPN1L	306	999	18	0	67	100	230	224
NM_032552.3	NP_115941.2	DAB2IP	87	3486	108	0	67	76	1132	1096
NM_032858.2	NP_116247.1	MAEL	264	1569	25	1	67	89	434	37
NM_033129.3	NP_149120.1	SCRT2	578	1502	169	1	67	84	307	45
NM_033229.2	NP_150232.2	TRIM15	479	1877	31	1	67	48	465	16
NM_130772.3	NP_570128.2	S100Z	330	630	18	0	67	116	99	93
NM_134261.2	NP_599023.1	RORA	85	1657	215	2	67	49	523	18
NM_138959.2	NP_620409.1	VANGL1	271	1846	175	1	67	90	524	63
NM_144593.2	NP_653194.1	RHEBL1	240	792	154	1	67	75	183	64
NM_144605.4	NP_653206.2	SEPTIN12, SEPT12	264	1341	75	0	67	94	358	333
NM_144999.3	NP_659436.1	LRRC45	342	2355	204	0	67	32	670	602
NM_145657.2	NP_663632.1	GSX1	48	843	202	1	67	59	264	92
NM_152281.2	NP_689494.2	GORAB	27	1212	75	0	67	93	394	369
NM_152362.2	NP_689575.2	TNFAIP8L1	118	679	60	0	67	121	186	166
NM_152374.1	NP_689587.1	C1orf216	488	1178	65	2	67	77	229	20
NM_152440.4	NP_689653.3	C12orf66	59	1397	106	1	67	86	445	42
NM_152597.4	NP_689810.3	FSIP1	218	1964	25	1	67	70	581	40
NM_173474.3	NP_775745.1	NTAN1	108	1041	142	1	67	42	310	8
NM_173519.2	NP_775790.1	CLVS1	324	1389	66	0	67	99	354	332
NM_173849.2	NP_776248.1	GSC	147	921	12	0	67	101	257	253
NM_177441.3	NP_803190.2	TMUB2	660	1566	13	1	67	75	301	11
NM_177924.4	NP_808592.2	ASAH1	312	1500	143	2	67	43	395	6
NM_178449.3	NP_848544.1	PTH2	102	405	270	0	67	52	100	10
NM_181581.2	NP_853559.1	DUS4L	363	1317	15	0	67	44	317	312
NM_182584.3	NP_872390.2	C20orf203	573	1158	63	0	67	102	194	173
NM_182759.2	NP_877436.1	TAFA3, FAM19A3	69	471	203	2	67	93	133	41
NM_198040.2	NP_932157.1	PHC2	54	2631	7	1	67	83	858	56
NM_199180.3	NP_954649.3	KIRREL2	212	2339	9	0	67	93	708	705
NM_205849.3	NP_995321.1	FAM9B	365	926	22	1	67	108	186	24
NM_213607.2	NP_998772.1	CCDC103	157	886	10	1	67	87	242	52
NM_000029.3	NP_000020.1	AGT	508	1966	27	0	68	117	485	476
NM_000059.3	NP_000050.2	BRCA2	227	10484	322	1	68	100	3418	12
NM_000202.7	NP_000193.1	IDS	217	1870	103	1	68	76	550	2
NM_000546.5	NP_000537.3	TP53	202	1384	65	2	68	57	393	5
NM_000946.2	NP_000937.1	PRIM1	64	1327	151	1	68	99	420	22
NM_001002000.2	NP_001002000.1	GMPR2	461	1508	19	1	68	77	348	1
NM_001004310.2	NP_001004310.2	FCRL6	42	1347	97	1	68	78	434	2
NM_001004489.2	NP_001004489.1	OR2AG1	21	972	55	1	68	66	316	20
NM_001009931.2	NP_001009931.1	HRNR	79	8632	37	1	68	78	2850	15
NM_001010857.2	NP_001010857.1	LELP1	123	420	10	1	68	93	98	32
NM_001013672.4	NP_001013694.4	C17orf97	16	1288	135	0	68	94	423	378
NM_001024599.4	NP_001019770.1	H2BC18, HIST2H2BF	50	431	177	0	68	101	126	67
NM_001024845.2	NP_001020016.1	SLC6A9	272	2174	24	0	68	72	633	625
NM_001029860.3	NP_001025031.2	FBXO43	736	2863	19	1	68	79	708	10
NM_001030311.2	NP_001025482.1	CERKL	101	1778	250	1	68	108	558	17
NM_001038640.2	NP_001033729.2	GOLGA6A	41	2123	33	0	68	66	693	682
NM_001039165.2	NP_001034254.2	MRGPRE	307	1246	3	0	68	85	312	311
NM_001039702.2	NP_001034791.1	OLAH	254	1052	34	1	68	91	265	17
NM_001039960.2	NP_001035049.1	SLC4A8	178	3460	55	1	68	90	1093	106
NM_001048221.2	NP_001041686.1	DBNDD2	204	690	162	0	68	66	161	107
NM_001099220.2	NP_001092690.1	ZNF862	245	3755	40	1	68	54	1169	14
NM_001113324.2	NP_001106795.2	TEN1	301	673	3	0	68	102	123	122
NM_001122890.2	NP_001116362.1	GGT6	75	1557	379	1	68	26	493	19
NM_001128618.1	NP_001122090.1	C9orf57	96	582	66	0	68	87	161	139
NM_001134438.1	NP_001127910.1	PHLDB2	411	4173	43	1	68	82	1253	3
NM_001142883.1	NP_001136355.1	IP6K3	536	1769	33	0	68	78	410	399
NM_001143818.1	NP_001137290.1	SERPINB2	333	1581	95	2	68	65	415	28
NM_001143835.1	NP_001137307.1	NFRKB	201	4101	18	0	68	63	1299	1293
NM_001145030.1	NP_001138502.1	TOPAZ1	168	5247	52	1	68	86	1692	71
NM_001145224.1	NP_001138696.1	GOLGA6D	35	2117	33	0	68	66	693	682
NM_001164404.1	NP_001157876.1	GOLGA6C	41	2123	33	0	68	66	693	682
NM_001164465.3	NP_001157937.2	GOLGA6L10	100	1669	36	0	68	76	522	510
NM_001164836.2	NP_001158308.1	FXYD6	618	906	42	0	68	62	95	81
NM_001166347.1	NP_001159819.1	SLC26A11	309	2130	51	0	68	113	606	589
NM_001184742.1	NP_001171671.1	ZBTB33	327	2346	67	1	68	37	672	47
NM_001195541.2	NP_001182470.1	GS1-259H13.2	400	1066	24	0	68	84	221	213
NM_001204268.1	NP_001191197.1	FXYD6-FXYD2	445	880	42	0	68	62	144	130
NM_001243926.1	NP_001230855.1	MAPKAPK3	642	1791	4	1	68	37	382	37
NM_001252.4	NP_001243.1	CD70	150	732	43	1	68	82	193	16
NM_001256185.1	NP_001243114.1	SNX12	166	655	148	1	68	77	162	13
NM_001258025.1	NP_001244954.1	TRIM60	344	1760	142	1	68	68	471	26
NM_001267536.2	NP_001254465.2	GOLGA6L4	62	1787	36	0	68	76	574	562
NM_001267560.1	NP_001254489.1	TJP3	234	2994	108	0	68	61	919	883
NM_001291438.1	NP_001278367.1	OR8G2P, OR8G2	54	969	39	0	68	86	304	291
NM_001297563.1	NP_001284492.1	TCEANC	385	1441	51	0	68	70	351	334
NM_001300975.1	NP_001287904.1	ANKRD42	932	2516	91	1	68	71	527	8
NM_001301190.1	NP_001288119.1	TRIB3	49	1126	64	1	68	48	358	3
NM_001310153.1	NP_001297082.1	GOLGA6L3	62	1655	36	0	68	76	530	518
NM_001321990.1	NP_001308919.1	LOC105376731	107	692	43	1	68	79	194	4
NM_001381.4	NP_001372.1	DOK1	595	2041	15	0	68	77	481	476
NM_001384.4	NP_001375.2	DPH2	195	1665	9	0	68	66	489	486
NM_001414.3	NP_001405.1	EIF2B1	219	1137	39	0	68	81	305	292
NM_001830.3	NP_001821.2	CLCN4	430	2713	7	1	68	53	760	4
NM_002460.3	NP_002451.2	IRF4	126	1482	39	0	68	75	451	438
NM_002762.3	NP_002753.2	PRM2	110	419	64	1	68	44	102	14
NM_002843.3	NP_002834.3	PTPRJ	355	4369	166	1	68	111	1337	2
NM_002990.4	NP_002981.2	CCL22	34	316	90	0	68	74	93	63
NM_003006.4	NP_002997.2	SELPLG	160	1399	76	1	68	77	412	23
NM_003161.3	NP_003152.1	RPS6KB1	139	1717	69	0	68	125	525	502
NM_003259.3	NP_003250.3	ICAM5	65	2840	375	0	68	58	924	799
NM_003276.2	NP_003267.1	TMPO	295	2380	70	1	68	83	694	1
NM_003368.4	NP_003359.3	USP1	758	3116	28	1	68	73	785	15
NM_003527.4	NP_003518.2	H2BC17, HIST1H2BO	38	419	177	0	68	101	126	67
NM_003718.4	NP_003709.3	CDK13	282	4821	442	1	68	97	1512	1
NM_004327.3	NP_004318.3	BCR	596	4412	66	0	68	52	1271	1249
NM_004679.2	NP_004670.1	VCY	72	450	174	0	68	100	125	67
NM_004907.2	NP_004898.2	IER2	328	1000	30	0	68	114	223	213
NM_005310.3	NP_005301.2	GRB7	275	1874	289	1	68	65	532	6
NM_005522.4	NP_005513.1	HOXA1	94	1102	7	1	68	107	335	3
NM_005535.2	NP_005526.1	IL12RB1	180	2169	112	1	68	77	662	12
NM_005806.3	NP_005797.1	OLIG2	181	1153	52	1	68	89	323	33
NM_005873.2	NP_005864.1	RGS19	267	921	13	1	68	58	217	89
NM_005899.4	NP_005890.2	NBR1	342	3243	22	1	68	85	966	1
NM_006048.4	NP_006039.2	UBE4B	688	4210	19	1	68	72	1173	35
NM_006233.4	NP_006224.1	POLR2I	448	826	56	2	68	101	125	1
NM_006442.3	NP_006433.2	DRAP1	245	863	60	0	68	115	205	185
NM_006928.4	NP_008859.1	PMEL	86	2072	20	2	68	68	661	51
NM_007170.2	NP_009101.2	TESK2	403	2119	91	1	68	91	571	1
NM_007232.2	NP_009163.2	HRH3	297	1635	120	0	68	117	445	405
NM_007286.5	NP_009217.3	SYNPO	542	3254	97	1	68	115	903	4
NM_012208.3	NP_036340.1	HARS2	223	1744	210	0	68	40	506	436
NM_012406.3	NP_036538.3	PRDM4	437	2843	12	0	68	90	801	797
NM_014028.3	NP_054747.2	OSTM1	86	1091	375	0	68	86	334	209
NM_014048.4	NP_054767.3	MRTFB, MKL2	181	3331	31	1	68	98	1049	5
NM_014112.4	NP_054831.2	TRPS1	605	4490	7	1	68	62	1294	19
NM_014387.3	NP_055202.1	LAT	352	1141	60	0	68	105	262	242
NM_014586.1	NP_055401.1	HUNK	360	2505	307	1	68	77	714	14
NM_014637.3	NP_055452.3	MTFR1	212	1214	30	0	68	78	333	323
NM_014720.3	NP_055535.2	SLK	561	4269	228	0	68	40	1235	1159
NM_015077.3	NP_055892.2	SARM1	371	2546	51	0	68	84	724	707
NM_015913.3	NP_056997.1	TXNDC12	1075	1594	73	1	68	60	172	32
NM_016107.4	NP_057191.2	ZFR	103	3328	11	2	68	60	1074	41
NM_016167.4	NP_057251.2	NOL7	32	806	51	0	68	80	257	240
NM_016183.3	NP_057267.2	MRTO4	255	975	95	2	68	88	239	50
NM_016186.2	NP_057270.1	SERPINA10	466	1801	151	1	68	92	444	17
NM_016286.3	NP_057370.1	DCXR	15	750	397	1	68	55	244	10
NM_016391.7	NP_057475.2	NOP16	388	925	73	1	68	88	178	48
NM_017590.5	NP_060060.3	ZC3H7B	276	3210	82	1	68	77	977	35
NM_017722.4	NP_060192.1	TRMT1	258	2238	108	0	68	75	659	623
NM_017790.4	NP_060260.3	RGS3	103	1912	100	1	68	41	602	11
NM_017807.3	NP_060277.1	OSGEP	425	1433	61	1	68	114	335	33
NM_017873.3	NP_060343.1	ASB6	170	1436	55	1	68	27	421	50
NM_018063.4	NP_060533.2	HELLS	155	2672	48	0	68	89	838	822
NM_018113.3	NP_060583.2	LMBR1L	345	1815	160	1	68	23	489	102
NM_018150.3	NP_060620.2	RNF220	488	2189	27	0	68	87	566	557
NM_018490.3	NP_060960.2	LGR4	473	3329	195	0	68	101	951	886
NM_018652.4	NP_061122.4	GOLGA6B	41	2123	33	0	68	66	693	682
NM_019026.4	NP_061899.2	TMCO1	18	738	153	0	68	83	239	188
NM_019034.2	NP_061907.2	RHOF	55	691	4	1	68	31	211	18
NM_019555.2	NP_062455.1	ARHGEF3	169	1750	268	1	68	72	526	47
NM_019855.4	NP_062829.1	CABP5	132	654	12	0	68	90	173	169
NM_020064.3	NP_064448.1	BARHL1	192	1176	13	1	68	120	327	33
NM_020126.4	NP_064511.2	SPHK2	366	2331	4	1	68	52	654	17
NM_020193.4	NP_064578.2	EMSY	143	4112	40	1	68	92	1322	57
NM_020208.3	NP_064593.1	SLC6A20	124	1903	108	0	68	92	592	556
NM_020214.3	NP_064599.2	PARP6	532	2425	25	1	68	84	630	38
NM_020226.3	NP_064611.3	PRDM8	1231	3301	34	1	68	76	689	10
NM_020335.2	NP_065068.1	VANGL2	486	2052	106	1	68	91	521	8
NM_020746.4	NP_065797.2	MAVS	172	1795	61	1	68	104	540	4
NM_020814.2	NP_065865.1	MARCHF4, MARCH4	1767	3000	6	0	68	59	410	408
NM_020859.3	NP_065910.3	SHROOM3	953	6944	3	0	68	91	1996	1995
NM_020902.1	NP_065953.1	CAMSAP3	101	3851	205	1	68	91	1249	1
NM_021004.3	NP_066284.2	DHRS4	54	891	54	0	68	99	278	260
NM_021240.3	NP_067063.1	DMRT3	34	1453	30	0	68	68	472	462
NM_021803.3	NP_068575.1	IL21	46	535	21	0	68	73	162	155
NM_021955.4	NP_068774.1	GNGT1	148	373	48	0	68	83	74	58
NM_021999.4	NP_068839.1	ITM2B	223	1024	124	1	68	90	266	19
NM_022117.3	NP_071400.1	TSPYL2	139	2221	13	1	68	84	693	10
NM_022659.3	NP_073150.2	EBF2	265	1993	66	0	68	82	575	553
NM_022773.3	NP_073610.2	LMF1	19	1723	21	0	68	106	567	560
NM_024109.3	NP_077014.3	METTL22	306	1521	27	0	68	78	404	395
NM_024331.4	NP_077307.2	TTPAL	145	1174	58	1	68	86	342	15
NM_024620.3	NP_078896.3	ZNF329	237	1863	12	0	68	100	541	537
NM_024786.2	NP_079062.1	ZDHHC11	384	1623	55	1	68	99	412	12
NM_025087.2	NP_079363.2	CWH43	182	2282	44	2	68	76	699	8
NM_025154.5	NP_079430.3	SUN1	132	2241	35	2	68	104	702	6
NM_025165.2	NP_079441.1	ELL3	403	1597	345	0	68	78	397	282
NM_030567.4	NP_085044.2	PRR7	490	1315	6	0	68	85	274	272
NM_030568.4	NP_085045.3	KHDC1	436	931	6	0	68	112	164	162
NM_030756.4	NP_110383.2	TCF7L2	507	2298	28	1	68	101	596	2
NM_031300.3	NP_112590.1	MXD3	461	1082	79	1	68	82	206	46
NM_032127.3	NP_115503.2	FAM160A2	359	3320	9	0	68	90	986	983
NM_032476.3	NP_115865.1	MRPS6	178	556	36	0	68	97	125	113
NM_032514.3	NP_115903.1	MAP1LC3A	172	538	169	1	68	79	121	3
NM_032869.3	NP_116258.2	NUDCD1	111	1863	142	1	68	95	583	37
NM_033036.2	NP_149025.1	GAL3ST3	282	1578	39	0	68	110	431	418
NM_052899.2	NP_443131.2	GPRIN1	175	3202	94	1	68	101	1008	10
NM_058229.3	NP_478136.1	FBXO32	239	1307	79	1	68	45	355	7
NM_130906.2	NP_570981.1	PPIL3	241	727	22	1	68	96	161	1
NM_133498.2	NP_598005.1	SPACA4	236	611	30	0	68	109	124	114
NM_138383.2	NP_612392.1	MTSS2, MTSS1L	260	2504	63	0	68	82	747	726
NM_138393.3	NP_612402.1	REEP6	265	820	202	1	68	48	184	77
NM_138434.2	NP_612443.1	ZBED6CL	556	1267	269	2	68	94	236	6
NM_138701.3	NP_619646.1	MPLKIP	85	625	393	0	68	71	179	48
NM_138960.3	NP_620410.3	TGIF2LX	49	775	96	0	68	92	241	209
NM_144686.3	NP_653287.2	TMC4	133	2254	184	1	68	89	706	81
NM_145170.3	NP_660153.3	CFAP70	121	3487	55	1	68	79	1121	2
NM_145865.2	NP_665872.2	ANKS4B	43	1297	85	1	68	54	417	4
NM_152413.2	NP_689626.2	GOT1L1	100	1366	21	0	68	52	421	414
NM_152663.4	NP_689876.2	RALGPS2	356	2108	9	0	68	84	583	580
NM_152751.2	NP_689964.2	BEND7	297	1704	27	0	68	79	468	459
NM_153244.1	NP_694976.1	RPP38-DT, C10orf111	274	742	58	1	68	115	155	2
NM_153347.2	NP_699178.1	TMEM86A	152	875	169	1	68	81	240	23
NM_172131.2	NP_742143.1	WFDC10B	28	298	176	2	68	58	89	11
NM_176875.3	NP_795344.1	CCKBR	255	1599	198	0	68	77	447	381
NM_178839.4	NP_849161.2	LRRTM1	270	1839	90	0	68	66	522	492
NM_181880.1	NP_870996.1	VCY1B	68	446	174	0	68	100	125	67
NM_182492.2	NP_872298.1	LRP5L	2465	3224	25	1	68	74	252	19
NM_182517.2	NP_872323.1	C1orf210	234	576	4	1	68	49	113	33
NM_182543.4	NP_872349.1	NSUN6	434	1844	63	0	68	55	469	448
NM_182705.2	NP_874364.1	RFLNB, FAM101B	64	709	25	1	68	87	214	74
NM_198083.3	NP_932349.2	DHRS4L2	130	829	6	0	68	120	232	230
NM_198123.1	NP_937756.1	CSMD3	159	11283	68	2	68	86	3707	2
NM_198181.3	NP_937824.3	GOLGA6L9	100	1399	36	0	68	76	432	420
NM_198281.2	NP_938022.2	GPRIN3	519	2850	127	1	68	71	776	22
NM_199040.3	NP_950241.1	NUDT4	400	946	3	0	68	100	181	180
NM_207360.2	NP_997243.2	ZC3H12D	270	1854	18	0	68	86	527	521
NM_213602.2	NP_998767.1	SIGLEC15	149	1136	135	0	68	46	328	283
NM_000095.2	NP_000086.2	COMP	36	2310	99	0	69	69	757	724
NM_000999.3	NP_000990.1	RPL38	128	341	55	1	69	66	70	13
NM_001004.3	NP_000995.1	RPLP2	105	453	139	1	69	54	115	24
NM_001004065.4	NP_001004065.2	AKAP2	102	2949	178	1	69	96	948	4
NM_001004342.3	NP_001004342.3	TRIM67	42	2394	73	1	69	81	783	291
NM_001005566.2	NP_001005566.1	OR5B2	52	982	126	0	69	84	309	267
NM_001011700.2	NP_001011700.2	MCCD1	53	413	85	1	69	87	119	23
NM_001012664.2	NP_001012682.1	SLC3A2	258	1965	117	0	69	80	568	529
NM_001031618.3	NP_001026789.2	SPDYE2	474	1683	82	1	69	86	402	29
NM_001034842.3	NP_001030014.2	PTCHD3	118	2422	193	1	69	123	767	54
NM_001037666.2	NP_001032755.1	CASTOR1, GATSL3	130	1120	159	0	69	47	329	276
NM_001039885.2	NP_001034974.1	FKRP	349	1837	67	1	69	64	495	44
NM_001080394.3	NP_001073863.1	SPIDR	81	2829	56	2	69	79	915	27
NM_001080475.2	NP_001073944.1	PLEKHM3	490	2776	19	1	69	27	761	6
NM_001080479.2	NP_001073948.2	ARHGEF28	176	5372	39	0	69	75	1731	1718
NM_001098483.2	NP_001091953.1	FUOM	18	483	63	0	69	87	154	133
NM_001098821.1	NP_001092291.1	TMEM91	351	870	53	2	69	85	172	1
NM_001128932.1	NP_001122404.1	CYP4F11	36	1611	124	1	69	63	524	32
NM_001135032.1	NP_001128504.1	EVA1A	478	937	39	0	69	118	152	139
NM_001135773.1	NP_001129245.1	SPATA2	350	1913	18	0	69	63	520	514
NM_001145524.1	NP_001138996.1	YPEL3	186	546	43	1	69	31	119	40
NM_001145643.1	NP_001139115.1	PHGR1	56	305	40	1	69	115	82	93
NM_001146210.2	NP_001139682.2	SPDYE6	421	1630	82	1	69	86	402	29
NM_001161625.1	NP_001155097.1	NXNL2	334	805	234	0	69	86	156	78
NM_001164440.1	NP_001157912.1	ANKRD33B	145	1630	48	0	69	49	494	478
NM_001164605.1	NP_001158077.1	FXYD5	91	628	111	0	69	78	178	141
NM_001166339.1	NP_001159811.1	SPDYE2B	474	1683	82	1	69	86	402	29
NM_001167942.1	NP_001161414.1	TNFAIP8L1	146	707	60	0	69	121	186	166
NM_001168241.1	NP_001161713.1	GAREM2	130	2755	42	0	69	99	874	860
NM_001172668.1	NP_001166139.1	ZNF668	785	2645	130	1	69	96	619	12
NM_001178085.1	NP_001171556.1	ZFX	443	2861	4	1	69	43	805	47
NM_001190487.2	NP_001177416.1	MTRNR2L6	932	1007	71	2	69	104	24	3
NM_001205315.1	NP_001192244.1	STEAP4	223	1603	19	1	69	79	459	6
NM_001242696.1	NP_001229625.1	LINC02874, C12orf80	326	758	13	1	69	81	143	10
NM_001243.4	NP_001234.3	TNFRSF8	222	2010	88	1	69	66	595	55
NM_001244949.1	NP_001231878.1	GPAM	214	2701	4	1	69	47	828	4
NM_001280561.1	NP_001267490.1	TMEM249	768	1476	192	0	69	74	235	171
NM_001287053.1	NP_001273982.1	C5orf67	226	610	61	1	69	93	127	8
NM_001287737.1	NP_001274666.1	SETSIP	31	940	30	0	69	103	302	292
NM_001290314.1	NP_001277243.1	ZNF571	221	2051	28	1	69	80	609	24
NM_001291366.1	NP_001278295.1	PERM1	71	2444	67	1	69	77	790	41
NM_001291825.1	NP_001278754.1	GRAP2	290	1283	43	1	69	97	330	2
NM_001306141.1	NP_001293070.1	SPDYE5	421	1630	82	1	69	86	402	29
NM_001310.3	NP_001301.1	CREBL2	340	703	4	1	69	53	120	9
NM_001318856.1	NP_001305785.1	CNPY3-GNMT	584	1274	21	0	69	103	229	222
NM_001319999.1	NP_001306928.1	RACGAP1	164	2063	9	0	69	92	632	629
NM_001334.2	NP_001325.1	CTSO	49	1015	64	1	69	74	321	32
NM_002265.5	NP_002256.2	KPNB1	407	3038	250	1	69	41	876	39
NM_002497.3	NP_002488.1	NEK2	151	1489	22	1	69	84	445	26
NM_002703.4	NP_002694.3	PPAT	159	1713	32	2	69	94	517	41
NM_002711.3	NP_002702.2	PPP1R3A	31	3400	82	1	69	98	1122	66
NM_003256.3	NP_003247.1	TIMP4	511	1186	86	2	69	96	224	25
NM_003274.4	NP_003265.3	TRAPPC10	169	3949	42	0	69	72	1259	1245
NM_003334.3	NP_003325.2	UBA1	223	3400	120	0	69	114	1058	1018
NM_003411.3	NP_003402.2	ZFY	321	2727	4	1	69	43	801	18
NM_003762.4	NP_003753.2	VAMP4	379	805	28	1	69	81	141	8
NM_003955.4	NP_003946.3	SOCS3	418	1096	33	0	69	75	225	214
NM_003993.3	NP_003984.2	CLK2	329	1826	154	1	69	83	498	90
NM_004192.3	NP_004183.2	ASMTL	137	2003	163	1	69	74	621	36
NM_004287.4	NP_004278.2	GOSR2	76	715	54	0	69	42	212	194
NM_004326.3	NP_004317.2	BCL9	651	4932	78	0	69	79	1426	1400
NM_004424.4	NP_004415.3	E4F1	126	2481	12	0	69	97	784	780
NM_004428.2	NP_004419.2	EFNA1	105	723	100	1	69	81	205	9
NM_004710.4	NP_004701.1	SYNGR2	72	747	130	1	69	64	224	101
NM_004836.6	NP_004827.4	EIF2AK3	302	3653	280	1	69	88	1116	11
NM_004873.3	NP_004864.1	BAG5	247	1591	6	0	69	101	447	445
NM_004905.2	NP_004896.1	PRDX6	51	726	95	2	69	102	224	34
NM_005010.4	NP_005001.3	NRCAM	486	4038	15	0	69	65	1183	1178
NM_005208.4	NP_005199.2	CRYBA1	7	655	51	0	69	111	215	198
NM_005338.6	NP_005329.3	HIP1	52	3166	9	0	69	87	1037	1034
NM_005625.3	NP_005616.2	SDCBP	150	1047	124	1	69	84	298	17
NM_005680.2	NP_005671.2	TAF1B	100	1867	59	2	69	80	588	4
NM_005975.3	NP_005966.1	PTK6	56	1412	37	1	69	93	451	14
NM_006181.2	NP_006172.1	NTN3	203	1946	94	1	69	83	580	13
NM_006297.2	NP_006288.2	XRCC1	120	2022	22	1	69	78	633	136
NM_006402.2	NP_006393.2	LAMTOR5	58	580	84	0	69	101	173	145
NM_006515.3	NP_006506.3	SETMAR	67	2122	39	0	69	120	684	671
NM_006587.3	NP_006578.2	CORIN	157	3286	76	1	69	83	1042	25
NM_006599.3	NP_006590.1	NFAT5	336	4932	82	1	69	38	1531	17
NM_006713.3	NP_006704.3	SUB1	128	512	178	1	69	103	127	9
NM_006775.2	NP_006766.1	QKI	551	1577	12	0	69	77	341	337
NM_007067.4	NP_008998.1	KAT7	216	2052	19	1	69	106	611	42
NM_007108.3	NP_009039.1	ELOB, TCEB2	57	414	15	0	69	78	118	113
NM_007250.5	NP_009181.2	KLF8	979	2059	9	0	69	77	359	356
NM_012199.4	NP_036331.1	AGO1	227	2801	225	0	69	53	857	782
NM_013256.5	NP_037388.3	ZNF180	283	2362	8	2	69	58	692	29
NM_013267.3	NP_037399.2	GLS2	296	2105	9	0	69	60	602	599
NM_013400.3	NP_037532.2	REPIN1	489	2193	33	0	69	103	567	556
NM_013975.3	NP_039269.2	LIG3	129	3159	91	1	69	102	1009	1
NM_014801.3	NP_055616.3	PCNX2	235	6649	166	1	69	87	2137	11
NM_015188.1	NP_056003.1	TBC1D12	185	2513	16	1	69	76	775	26
NM_015332.3	NP_056147.2	NUDCD3	186	1272	25	1	69	54	361	107
NM_015361.3	NP_056176.2	R3HDM1	428	3728	6	0	69	99	1099	1097
NM_015424.5	NP_056239.3	CHRDL2	497	1853	90	0	69	108	451	421
NM_015557.2	NP_056372.1	CHD5	111	5976	54	0	69	83	1954	1936
NM_015668.4	NP_056483.3	RGS22	195	3990	73	1	69	74	1264	4
NM_016115.4	NP_057199.1	ASB3	202	1759	64	1	69	100	518	4
NM_016142.2	NP_057226.1	HSD17B12	235	1174	121	1	69	77	312	29
NM_016368.4	NP_057452.1	ISYNA1	218	1895	183	0	69	91	558	497
NM_016445.2	NP_057529.1	PLEK2	141	1203	71	2	69	73	353	14
NM_016589.3	NP_057673.2	TIMMDC1	213	1071	161	2	69	72	285	11
NM_016606.3	NP_057690.2	REEP2	208	967	103	1	69	84	252	1
NM_017432.4	NP_059128.2	PTOV1	209	1460	168	0	69	60	416	360
NM_017495.5	NP_059965.2	RBM38	184	904	69	0	69	96	239	216
NM_017514.4	NP_059984.3	PLXNA3	175	5791	196	1	69	66	1871	36
NM_017577.4	NP_060047.3	GRAMD1C	76	2065	30	0	69	74	662	652
NM_017723.2	NP_060193.2	TOR4A	117	1389	442	1	69	96	423	26
NM_017794.4	NP_060264.4	FOCAD	364	5770	7	1	69	67	1801	26
NM_017909.3	NP_060379.2	RMND1	180	1530	84	0	69	66	449	421
NM_017969.2	NP_060439.2	IWS1	303	2763	34	1	69	69	819	21
NM_017983.6	NP_060453.3	WIPI1	103	1444	163	1	69	90	446	19
NM_018074.5	NP_060544.2	YJU2, CCDC94	77	1049	105	0	69	84	323	288
NM_018206.5	NP_060676.2	VPS35	99	2490	28	1	69	91	796	13
NM_018306.3	NP_060776.2	TMEM40	127	829	64	1	69	101	233	1
NM_018593.4	NP_061063.2	SLC16A10	175	1723	175	1	69	75	515	14
NM_020070.3	NP_064455.1	IGLL1	118	760	106	1	69	92	213	27
NM_020643.2	NP_065694.2	C11orf16	124	1528	24	0	69	79	467	459
NM_020921.3	NP_065972.3	NIN	191	6593	4	1	69	47	2133	38
NM_021254.3	NP_067077.1	CFAP298, C21orf59	628	1501	106	1	69	105	290	15
NM_021603.3	NP_067614.1	FXYD2	79	274	55	1	69	112	64	10
NM_021873.3	NP_068659.1	CDC25B	793	2536	109	1	69	100	580	37
NM_022080.2	NP_071363.1	NAPB	117	1014	39	0	69	88	298	285
NM_022760.4	NP_073597.2	PCED1A	513	1878	51	0	69	74	454	437
NM_022912.2	NP_075063.1	REEP1	144	750	8	2	69	75	201	29
NM_024917.5	NP_079193.2	TRMT2B	806	2321	54	0	69	59	504	486
NM_025176.5	NP_079452.3	NINL	88	4237	4	1	69	49	1382	30
NM_030763.2	NP_110390.1	HMGN5	329	1178	33	0	69	72	282	271
NM_030768.2	NP_110395.1	ILKAP	130	1309	88	1	69	57	392	40
NM_030941.2	NP_112203.2	LOC81691	263	2588	93	0	69	90	774	743
NM_031262.3	NP_112552.1	HNRNPK	387	1779	46	1	69	61	463	41
NM_031372.3	NP_112740.1	HNRNPDL	535	1798	25	1	69	83	420	13
NM_031891.3	NP_114097.2	CDH20	398	2804	18	0	69	80	801	795
NM_032246.4	NP_115622.2	MEX3B	438	2148	85	1	69	61	569	35
NM_032497.2	NP_115886.1	ZNF559	662	2279	52	1	69	89	538	24
NM_032574.3	NP_115963.1	DPY30	279	579	15	0	69	72	99	94
NM_032778.5	NP_116167.3	RIOX2, MINA	577	1972	63	0	69	72	464	443
NM_032885.5	NP_116274.3	ATG4D	197	1622	432	0	69	37	474	330
NM_052884.2	NP_443116.2	SIGLEC11	91	2188	36	0	69	91	698	686
NM_052885.3	NP_443117.3	SLC2A13	51	1998	22	1	69	91	648	8
NM_130838.1	NP_570853.1	UBE3A	44	2603	67	1	69	88	852	65
NM_145175.3	NP_660158.2	LRATD1, FAM84A	291	1170	115	1	69	51	292	16
NM_152676.2	NP_689889.1	FBXO15	336	1641	40	1	69	25	434	2
NM_152688.3	NP_689901.2	KHDRBS2	279	1329	30	0	69	102	349	339
NM_152793.2	NP_690006.2	MTURN	201	597	35	2	69	89	131	46
NM_152995.5	NP_694540.3	NFXL1	97	2833	76	1	69	74	911	54
NM_153002.2	NP_694547.2	GPR156	197	2642	73	1	69	50	814	38
NM_153603.3	NP_705831.1	COG7	197	2510	52	1	69	77	770	23
NM_171982.4	NP_741983.2	TRIM35	84	1566	450	0	69	80	493	343
NM_173157.2	NP_775180.1	NR4A1	169	1966	22	1	69	94	598	18
NM_173160.2	NP_775183.1	FXYD4	332	602	58	1	69	84	89	19
NM_173487.2	NP_775758.2	C4orf33	364	964	28	1	69	73	199	4
NM_173666.3	NP_775937.1	DTWD2	94	991	347	2	69	80	298	7
NM_175737.3	NP_783864.1	KLB	97	3232	34	1	69	71	1044	10
NM_177973.1	NP_814444.1	SULT2B1	81	1179	46	1	69	77	365	60
NM_178434.2	NP_848521.1	LCE3C	70	355	191	2	69	67	94	9
NM_178507.2	NP_848602.1	OAF	241	1063	232	1	69	83	273	1
NM_178520.3	NP_848615.1	TMEM105	550	940	73	1	69	86	129	1
NM_181645.3	NP_857596.2	DEUP1, CCDC67	100	1915	24	0	69	101	604	596
NM_181727.1	NP_859078.1	SPATA12	675	1248	60	0	69	79	190	170
NM_181885.2	NP_871001.1	RXFP4	21	1146	49	1	69	60	374	7
NM_182691.2	NP_872633.1	SRPK2	234	2301	157	1	69	72	688	18
NM_182971.2	NP_892016.1	COX8C	78	297	129	0	69	123	72	29
NM_198498.2	NP_940900.1	C11orf53	147	858	91	1	69	95	236	42
NM_198535.2	NP_940937.1	ZNF699	370	2299	67	1	69	89	642	24
NM_199344.2	NP_955376.1	SFT2D2	63	546	249	0	69	100	160	77
NM_203453.3	NP_982278.3	PLPP6	82	970	21	0	69	81	295	288
NM_213589.2	NP_998754.1	RAPH1	225	3978	16	1	69	69	1250	29
NM_000610.3	NP_000601.3	CD44	434	2663	115	1	70	85	742	31
NM_001089584.2	NP_001083053.1	C5orf49	469	913	166	1	70	53	147	8
NM_001278495.1	NP_001265424.1	NUTM2B	383	3020	132	0	70	112	878	834
NM_018936.3	NP_061759.1	PCDHB2	184	2581	222	0	70	99	798	724
NM_032825.4	NP_116214.2	ZNF382	127	1780	31	1	70	81	550	1
NM_153219.3	NP_694951.1	ZNF524	107	902	262	1	70	60	264	51
