# Supplementary material for: Translation initiation downstream from annotated start codons in human mRNAs coevolves with the Kozak context
Source: Genome Res. 2020 Jul;30(7):974–84. doi: 10.1101/gr.257352.119 (PMC7397870; doi:10.1101/gr.257352.119)
Supplement: Supplemental Material [file supp_gr.257352.119_Supplemental_Table_S3.xlsx]

## Sheet: Supplemental_Table_S3
Supplemental Table S3. Conserved “strong” set. Constituted by 10% of the mRNAs with the highest sAUG TIESS.
RefSeq_ID	sAUG_TIESS	fdAUG_TIESS	fdAUG_frame
NM_016209.4	3.81305	-13.6549	0
NM_002371.3	3.81417	-1.45922	0
NM_000818.2	3.81702	6.92704	1
NM_001017.2	3.81731	-20.7596	0
NM_004543.4	3.81984	-5.41354	1
NM_001135998.2	3.82003	-12.2129	1
NM_016037.3	3.82301	1.06796	1
NM_001291999.1	3.82361	-1.49575	1
NM_024926.3	3.825	0.224908	0
NM_015331.2	3.82526	-0.0680515	1
NM_000481.3	3.82596	-5.47602	1
NM_004453.3	3.82836	-15.1191	1
NM_015434.3	3.82873	-10.5536	1
NM_016309.2	3.82882	4.15634	1
NM_002065.6	3.8301	-9.21797	0
NM_004114.3	3.83024	-6.71289	1
NM_015171.3	3.8339	-3.52175	0
NM_014043.3	3.83442	-18.3307	1
NM_018093.3	3.8352	-2.57251	1
NM_001825.2	3.83605	-1.43517	1
NM_005181.3	3.83608	-6.44901	1
NM_198391.2	3.83631	5.72544	0
NM_012237.3	3.83704	-3.72797	0
NM_000921.4	3.8371	-8.77242	0
NM_001005368.2	3.83857	-5.52319	1
NM_080759.5	3.83864	-1.6404	1
NM_006937.3	3.83975	-1.19559	1
NM_001143906.1	3.8407	-2.56812	1
NM_145715.2	3.84259	0.945925	1
NM_003758.3	3.84344	-1.75864	1
NM_004926.3	3.84552	-32.7859	2
NM_001190787.1	3.84593	-2.37226	0
NM_012133.5	3.84618	-11.5746	1
NM_024105.3	3.84675	-3.97971	1
NM_001256720.1	3.84894	-10.9237	0
NM_021242.5	3.85115	10.3627	0
NM_017563.4	3.85169	1.55356	1
NM_021931.3	3.85322	-7.46933	1
NM_001714.2	3.85428	3.74964	1
NM_023012.5	3.855	-4.00739	1
NM_015564.2	3.85538	-14.9671	0
NM_001099274.1	3.85601	-17.2039	0
NM_015698.5	3.8576	6.04916	1
NM_001306084.1	3.85947	-15.2741	1
NM_032323.2	3.85991	5.04675	1
NM_007007.2	3.86068	-2.97152	1
NM_014678.4	3.8639	-5.94859	1
NM_015323.4	3.86447	-12.0812	1
NM_017612.4	3.8647	4.18499	1
NM_001036.4	3.8652	0.809356	1
NM_080861.3	3.8657	-7.39317	1
NM_145205.5	3.8667	-5.30534	1
NM_016374.5	3.86803	-12.3509	1
NM_005294.2	3.86834	-25.3805	1
NM_033133.4	3.8685	-1.46941	0
NM_031273.2	3.86961	4.42143	0
NM_153604.3	3.87076	-20.0159	1
NM_024653.3	3.87253	-2.31487	1
NM_004380.2	3.8743	-3.91796	1
NM_153045.3	3.87469	3.82602	1
NM_017411.3	3.87553	1.91601	0
NM_012444.2	3.87639	0.469653	0
NM_024525.4	3.87739	-5.65158	1
NM_013264.4	3.87803	-6.24742	1
NM_006460.2	3.87945	0.812189	1
NM_012407.3	3.88033	-2.30844	1
NM_002589.2	3.88127	-1.25943	0
NM_004311.3	3.8817	0.512783	1
NM_002816.4	3.88512	-3.30389	0
NM_001039661.1	3.88622	3.16223	0
NM_002722.4	3.8868	-3.13698	1
NM_005000.4	3.88838	-7.61211	1
NM_006156.2	3.8888	-6.0999	0
NM_003530.4	3.89037	4.02297	0
NM_198490.2	3.89242	2.15526	0
NM_006568.2	3.89353	-13.5677	1
NM_183050.3	3.89598	-1.22572	1
NM_006948.4	3.89674	0.804288	0
NM_001031715.2	3.89716	-8.36747	1
NM_015100.3	3.90162	-15.8971	0
NM_152546.2	3.902	-2.13094	0
NM_178815.3	3.90242	3.12678	1
NM_003375.4	3.90316	-5.45279	0
NM_174923.2	3.90448	-2.86901	1
NM_144662.2	3.90633	2.19074	1
NM_003562.4	3.91512	0.448839	0
NM_145284.5	3.91525	-3.3259	0
NM_018706.6	3.91575	3.17867	1
NM_053027.3	3.91703	-4.57267	1
NM_030645.1	3.91818	-2.34434	1
NM_001148.4	3.92467	-2.00869	0
NM_138355.3	3.92603	-2.09425	2
NM_015646.5	3.92899	-20.5116	1
NM_194434.2	3.92968	2.14871	0
NM_001023.3	3.93347	-14.6143	0
NM_001005353.2	3.93367	3.33832	0
NM_032125.2	3.93402	4.74201	0
NM_016129.2	3.93518	-13.1049	0
NM_017434.4	3.93765	-6.5707	2
NM_001010883.2	3.94166	2.01801	0
NM_005174.3	3.94401	-5.84206	2
NM_001077690.1	3.94455	-2.71567	2
NM_015416.4	3.94493	-2.46603	1
NM_001118.4	3.94511	-1.12443	0
NM_003002.3	3.94882	-0.575061	2
NM_005369.4	3.9489	-1.80213	0
NM_001167.3	3.9494	1.15195	1
NM_015464.2	3.95546	-24.9197	2
NM_032978.6	3.95582	4.57374	0
NM_145017.2	3.96589	3.84937	0
NM_001077619.1	3.96822	-22.0688	1
NM_080391.3	3.96872	-11.4664	1
NM_004483.4	3.97239	-5.09695	2
NM_014613.2	3.97289	-12.2311	0
NM_144568.3	3.97376	-7.85744	1
NM_017526.4	3.97445	-16.2001	0
NM_006638.3	3.97445	-7.64757	2
NM_022735.3	3.97507	0.120443	1
NM_001168618.1	3.9754	-3.74051	1
NM_144609.2	3.97731	0.984461	1
NM_003094.3	3.97956	-5.41309	0
NM_001142854.1	3.9808	-7.15931	0
NM_172069.3	3.98082	-1.82786	2
NM_012193.3	3.98159	-1.13344	0
NM_019053.5	3.98223	-32.1064	1
NM_001902.5	3.98246	-3.24573	1
NM_001004127.2	3.98459	-15.461	2
NM_014264.4	3.98495	4.02681	0
NM_000966.5	3.98876	1.64186	0
NM_201398.2	3.99088	-3.7141	1
NM_016604.3	3.99214	-2.3796	0
NM_015541.2	3.99317	-1.92847	1
NM_001098522.1	3.99424	6.28483	0
NM_000614.3	3.9947	-10.7875	1
NM_005791.2	3.99678	-12.997	1
NM_002044.3	3.99717	3.01745	0
NM_138357.2	3.99738	-9.0955	1
NM_019885.3	4.0001	-0.424369	0
NM_006909.2	4.00064	-0.0844997	1
NM_015124.4	4.00179	0.0576821	1
NM_001162495.2	4.00361	-2.80643	0
NM_153262.3	4.00468	-6.64054	1
NM_024626.3	4.00657	0.404987	1
NM_001003845.2	4.00757	-7.37074	0
NM_001098515.1	4.01248	-0.511989	0
NM_001013623.2	4.01344	1.19372	1
NM_017709.3	4.01512	-7.13073	0
NM_006754.3	4.01549	-0.655144	0
NM_002874.4	4.02055	-5.56037	1
NM_016823.3	4.02057	-1.76465	1
NM_024923.3	4.0207	-3.56929	1
NM_007045.3	4.02085	-11.1082	1
NM_178864.3	4.02119	0.859262	0
NM_201253.2	4.02147	-5.03682	2
NM_005990.3	4.02179	-1.27164	1
NM_001242640.1	4.02232	1.9498	0
NM_003365.2	4.02384	-7.37567	1
NM_020981.3	4.02515	-15.4071	1
NM_173829.3	4.02629	-2.85216	2
NM_013252.2	4.02688	-10.1102	0
NM_005921.1	4.02904	-2.9528	0
NM_002268.4	4.02979	-1.09246	0
NM_014176.3	4.03123	-2.19119	0
NM_018710.2	4.03359	-3.16258	1
NM_004279.2	4.03579	-8.35878	1
NM_030576.3	4.03979	-7.53976	1
NM_022443.4	4.04647	-1.3193	0
NM_032943.4	4.0465	4.88435	0
NM_198353.2	4.04814	-2.85227	0
NM_001145636.1	4.04977	-4.97762	0
NM_005649.2	4.05094	-0.319713	1
NM_024066.2	4.05106	-11.3468	0
NM_014548.3	4.05353	-10.3847	1
NM_001265577.1	4.05449	-1.85488	1
NM_002918.4	4.05481	2.05418	1
NM_007034.4	4.05749	-5.94219	1
NM_053281.3	4.05796	-0.790673	0
NM_024079.4	4.05809	-6.38951	2
NM_003720.3	4.05829	2.67922	1
NM_018186.3	4.06007	-11.4072	0
NM_022829.5	4.06082	1.21986	0
NM_182539.3	4.06123	-15.517	0
NM_198465.3	4.0614	0.139652	1
NM_001324132.1	4.06213	-2.2995	0
NM_001911.2	4.06337	0.104781	0
NM_001142286.1	4.06408	-1.58825	1
NM_001005498.3	4.06692	5.09242	1
NM_032309.3	4.06692	7.45835	1
NM_012181.4	4.06872	-8.28557	1
NM_018010.3	4.07164	1.26338	1
NM_001284.3	4.07368	-0.433765	1
NM_020982.3	4.07473	1.0533	0
NM_001278628.1	4.07779	-0.726562	1
NM_019037.2	4.07855	-2.21001	0
NM_021150.3	4.07909	-15.3926	2
NM_178812.3	4.07971	-0.312682	0
NM_003902.4	4.08122	-0.235627	1
NM_004344.1	4.08159	2.32272	0
NM_022081.5	4.08274	-17.4886	1
NM_012433.3	4.08547	-10.6268	1
NM_203474.1	4.0856	2.85159	1
NM_152730.5	4.08668	-0.303565	0
NM_006532.3	4.08781	1.63185	1
NM_002866.4	4.088	0.896215	1
NM_018284.2	4.08935	-3.49845	0
NM_032303.4	4.09247	4.0897	2
NM_021111.2	4.09254	-0.775805	0
NM_194286.3	4.09257	0.59306	1
NM_003343.5	4.09307	0.852031	0
NM_001193557.1	4.09499	-2.71612	1
NM_001012970.2	4.09644	-2.33459	2
NM_014871.4	4.09715	-5.33056	1
NM_024589.2	4.09814	2.55979	0
NM_012235.3	4.09973	0.680239	1
NM_022465.3	4.10167	-1.22176	0
NM_003673.3	4.10181	-4.585	2
NM_001317836.1	4.10241	2.31938	1
NM_007019.3	4.10271	-2.83705	0
NM_152622.4	4.10394	2.73137	1
NM_019591.3	4.10499	-5.85446	0
NM_005740.2	4.10507	-1.30837	1
NM_030953.3	4.10578	-0.19964	0
NM_001170795.1	4.10819	0.96199	2
NM_005486.2	4.10856	-22.9474	0
NM_024328.5	4.10911	3.57094	1
NM_003817.3	4.10931	-16.7291	0
NM_013250.2	4.11174	-2.34494	0
NM_016627.4	4.11248	-1.27962	1
NM_153699.1	4.11327	-7.16738	1
NM_032336.2	4.11442	-4.27016	1
NM_004420.2	4.11491	-6.70322	0
NM_001812.2	4.11524	2.11037	1
NM_032442.2	4.1153	-3.8015	1
NM_001142462.2	4.11568	4.63029	0
NM_003489.3	4.1166	-9.41381	1
NM_001199383.1	4.1174	-8.94179	1
NM_001659.2	4.1192	-2.55278	0
NM_005513.2	4.11942	-0.302867	1
NM_014719.2	4.12184	-2.93168	0
NM_181654.3	4.1219	-10.7382	0
NM_016248.3	4.12375	-6.82632	0
NM_020971.2	4.12425	-5.16828	0
NM_004818.2	4.12446	0.841975	1
NM_004446.2	4.12534	-1.44428	1
NM_001031689.2	4.12585	3.21298	0
NM_014679.4	4.12748	-5.97065	1
NM_000700.2	4.12816	-3.41635	0
NM_005785.3	4.12883	-10.0186	1
NM_018358.2	4.1291	-15.1561	1
NM_000514.3	4.1295	5.52629	2
NM_152756.4	4.12974	1.24271	1
NM_032892.4	4.13069	-16.5602	0
NM_138966.3	4.13172	-13.1003	1
NM_002358.3	4.13226	-1.73872	1
NM_015144.2	4.13274	1.49024	1
NM_025058.4	4.13801	1.34621	0
NM_012292.4	4.13849	-5.0244	0
NM_002489.3	4.1405	-0.0401534	1
NM_198467.2	4.14114	3.85803	1
NM_002492.3	4.14268	-2.02867	0
NM_001271049.1	4.14318	-1.25331	1
NM_021102.3	4.14921	-4.514	2
NM_007225.2	4.14972	1.7786	1
NM_024585.3	4.15201	-6.08096	1
NM_004643.3	4.15265	-2.91304	0
NM_144677.2	4.15268	-0.692299	1
NM_024595.2	4.15333	-11.6512	0
NM_032014.2	4.15471	-7.95122	1
NM_173076.2	4.15508	-5.19117	2
NM_024419.4	4.15758	1.0482	2
NM_014310.3	4.15784	5.29062	0
NM_207009.3	4.15886	-11.1177	0
NM_018467.3	4.16346	4.93924	0
NM_001104554.1	4.16434	-11.7094	1
NM_003850.2	4.16524	-4.09352	0
NM_014058.3	4.16539	4.15378	0
NM_031205.3	4.16767	1.04954	0
NM_001163435.2	4.16783	0.297031	0
NM_001324.2	4.16887	-14.2813	1
NM_012152.2	4.17436	-21.9189	1
NM_006044.3	4.17719	1.08659	0
NM_016106.3	4.17822	-18.7289	0
NM_152721.5	4.18009	0.480329	2
NM_016097.4	4.18136	-9.41714	0
NM_181892.3	4.18189	3.29409	2
NM_006283.2	4.18217	-3.81057	2
NM_018569.5	4.18249	1.00732	2
NM_002170.3	4.18285	-1.52729	0
NM_152280.4	4.18503	-10.9243	1
NM_024410.3	4.18853	0.799997	2
NM_001314021.1	4.18859	-0.855313	1
NM_001206528.2	4.19001	-1.37038	0
NM_002437.4	4.19023	0.163851	0
NM_016076.4	4.19115	0.966909	0
NM_005456.3	4.19232	1.02434	1
NM_152581.3	4.19261	-0.0332513	1
NM_004872.4	4.19382	5.29252	0
NM_019070.4	4.19505	-5.84211	2
NM_004696.2	4.19552	-12.2958	1
NM_006662.2	4.19943	-5.09235	0
NM_021114.3	4.19947	-0.339579	2
NM_016047.3	4.20019	2.7015	0
NM_001545.2	4.20245	-7.53707	1
NM_005415.4	4.20534	-6.84737	2
NM_080749.3	4.20681	-10.7275	1
NM_153486.3	4.20683	-1.28819	1
NM_000286.2	4.2077	-11.4819	1
NM_032801.4	4.20918	2.62302	1
NM_002657.3	4.2096	13.5289	1
NM_032291.3	4.21083	-1.0558	0
NM_005804.3	4.21891	-1.22768	1
NM_033198.3	4.22091	-11.5016	1
NM_006767.3	4.22382	-5.23004	1
NM_014953.4	4.22412	0.631453	0
NM_016622.3	4.22491	-3.39343	1
NM_016542.3	4.22738	-1.46085	0
NM_001512.3	4.23513	-11.1363	0
NM_000506.4	4.23581	-3.16888	1
NM_005339.4	4.24076	-15.0585	1
NM_005920.3	4.2409	-9.83946	0
NM_002201.5	4.24202	-3.78092	0
NM_001005464.2	4.2448	3.29898	0
NM_016383.4	4.24685	-0.27204	0
NM_032776.2	4.24734	-21.5882	1
NM_006154.3	4.24779	-14.4873	1
NM_025237.2	4.25094	2.39742	1
NM_012219.4	4.25217	-0.551933	1
NM_033624.2	4.25317	-4.55955	0
NM_000344.3	4.25409	2.22772	0
NM_033641.3	4.25682	-16.646	1
NM_002709.2	4.25995	1.39075	2
NM_004575.2	4.26232	0.128697	0
NM_020157.3	4.26417	-5.40076	2
NM_031291.3	4.2646	-5.4121	0
NM_003783.3	4.26667	-1.97853	0
NM_001117.4	4.26701	1.50326	0
NM_000633.2	4.26998	-0.623379	0
NM_001024210.1	4.27041	-2.05522	1
NM_198566.3	4.27252	-9.74914	0
NM_145115.2	4.27259	5.09276	0
NM_007175.6	4.27325	-21.5145	0
NM_002865.2	4.27438	2.81942	2
NM_024573.2	4.27502	-2.60412	1
NM_003575.3	4.27545	4.59685	0
NM_006812.3	4.27806	-2.92489	0
NM_153611.4	4.27916	-2.61877	0
NM_152282.4	4.28488	-0.582195	1
NM_016464.4	4.28533	-8.14466	1
NM_001754.4	4.28546	-13.7784	0
NM_001290342.2	4.28609	-4.53195	2
NM_020232.4	4.28676	-7.15377	0
NM_001194986.1	4.28807	-9.21302	0
NM_017772.3	4.28876	-27.281	1
NM_001134479.1	4.28936	-4.20501	1
NM_152613.2	4.29141	-2.16446	1
NM_001013690.4	4.29235	-0.643159	1
NM_001130929.1	4.29535	2.0203	0
NM_001010874.4	4.29901	1.26748	1
NM_013249.2	4.2992	-0.348877	1
NM_000663.4	4.30222	-4.03778	0
NM_005969.3	4.30225	-1.0348	1
NM_198243.2	4.30307	1.00773	1
NM_001171894.2	4.30312	-3.19438	0
NM_032611.2	4.30339	-8.33487	0
NM_001136191.2	4.3039	-0.630131	1
NM_006612.5	4.30496	-4.36195	1
NM_017771.4	4.3058	-7.66538	0
NM_012110.3	4.30595	-5.18968	1
NM_175882.2	4.30616	-11.4611	1
NM_024086.3	4.30803	-6.66331	0
NM_000370.3	4.31037	-0.553411	2
NM_213653.3	4.31285	1.36632	1
NM_181458.3	4.31318	2.32415	0
NM_014813.2	4.31589	0.322021	0
NM_005051.2	4.31736	-4.71152	1
NM_001136107.1	4.31785	1.20316	1
NM_032338.3	4.3185	0.0761487	0
NM_004248.2	4.3198	-2.72752	0
NM_001294.3	4.32072	4.46976	1
NM_001188.3	4.32112	-3.00132	0
NM_001017975.4	4.32549	-3.12986	1
NM_019050.2	4.32692	-3.0563	2
NM_015141.3	4.32693	-3.68645	1
NM_033087.3	4.33668	-13.4909	0
NM_152745.2	4.34148	-5.59482	2
NM_007247.5	4.3441	-5.7211	0
NM_012097.3	4.34423	-7.25187	2
NM_130768.2	4.34506	3.6265	1
NM_021191.2	4.34597	1.78829	0
NM_022737.2	4.35071	1.37777	1
NM_006011.3	4.35212	-18.4515	0
NM_014974.2	4.35262	1.22923	0
NM_001244584.2	4.35953	-1.58362	1
NM_080671.3	4.3604	-7.01795	0
NM_018139.2	4.36041	-7.74036	0
NM_001642.2	4.36057	-7.5609	1
NM_032453.1	4.36113	-1.87863	0
NM_001318329.1	4.36255	-3.94081	1
NM_181699.2	4.36275	-1.43871	1
NM_025144.3	4.36586	-2.74937	1
NM_001171092.1	4.3667	-0.0579493	0
NM_006582.3	4.36889	-12.5776	1
NM_198097.3	4.36996	0.358377	1
NM_012448.3	4.37073	-5.84831	0
NM_024835.4	4.37454	-1.44768	0
NM_016337.2	4.3762	-4.36353	0
NM_005142.2	4.37802	-11.6513	2
NM_001018.4	4.37916	-0.818042	0
NM_003913.4	4.38109	-3.11636	0
NM_052898.1	4.38198	0.58261	0
NM_030798.4	4.38577	-2.51607	1
NM_015030.1	4.38746	-1.46915	1
NM_006029.4	4.38781	2.17711	0
NM_002491.2	4.39864	-9.13803	1
NM_001318890.1	4.40511	-8.33331	0
NM_005444.2	4.40528	-1.72046	1
NM_018648.3	4.4054	-1.50435	0
NM_017777.3	4.40671	1.20638	1
NM_198989.3	4.40719	-5.78351	0
NM_001668.3	4.40826	0.938836	0
NM_022128.2	4.4083	-13.0575	0
NM_058004.3	4.4084	-17.7349	0
NM_006704.4	4.40888	-7.80257	1
NM_078470.5	4.40942	0.642991	2
NM_025077.3	4.40961	3.79875	1
NM_012249.3	4.40965	-5.64114	0
NM_000846.4	4.41068	-4.47432	0
NM_001031712.2	4.41089	2.20425	0
NM_052903.4	4.41127	-12.754	1
NM_001111319.1	4.41156	0.432406	2
NM_000136.2	4.41214	-16.362	0
NM_001006617.1	4.41287	-7.54664	1
NM_012124.2	4.41446	0.909112	1
NM_198229.2	4.4185	-3.42872	0
NM_152692.4	4.4186	-1.4866	0
NM_001006939.3	4.41941	-12.867	1
NM_002807.3	4.42249	-18.1835	1
NM_013320.2	4.42271	-6.97737	0
NM_004701.3	4.42641	1.44582	1
NM_213595.3	4.42735	2.54638	1
NM_173846.4	4.42837	-1.7744	0
NM_001304944.1	4.43024	-11.3974	1
NM_014463.2	4.43098	-13.3625	1
NM_152346.2	4.43155	-14.5924	0
NM_173525.2	4.4332	-19.8485	1
NM_144649.2	4.43526	-6.3813	0
NM_032539.4	4.44292	-0.0839727	1
NM_020246.3	4.44298	-0.319885	1
NM_001134673.3	4.44305	2.38494	1
NM_001001895.2	4.44487	2.47296	0
NM_004528.3	4.44598	0.454577	1
NM_014969.5	4.44679	-28.5087	1
NM_005027.3	4.44777	-14.7618	0
NM_001042625.1	4.44789	0.525371	1
NM_175741.2	4.4482	-5.65928	1
NM_006949.3	4.44842	0.270102	1
NM_001293179.1	4.44867	-1.48924	2
NM_014014.4	4.44936	-15.4271	1
NM_001318918.1	4.45391	-14.0365	1
NM_001198868.1	4.45426	-2.21487	1
NM_003348.3	4.45504	-2.63064	1
NM_007238.4	4.45654	-21.8197	1
NM_003945.3	4.45739	-1.40182	0
NM_024034.4	4.45954	-0.923465	1
NM_001042603.2	4.46079	-11.2978	1
NM_019858.1	4.46289	-7.65745	1
NM_004366.5	4.46582	-3.30505	0
NM_012341.2	4.46647	-22.6964	0
NM_002168.3	4.46757	0.214322	1
NM_001286389.1	4.46828	-2.49955	0
NM_145720.3	4.46993	-12.428	1
NM_017697.3	4.47201	-11.482	1
NM_002912.4	4.47327	-0.342234	0
NM_006745.4	4.4747	-5.96123	1
NM_001015.4	4.47714	-3.73616	2
NM_030806.3	4.47734	3.57927	1
NM_004500.3	4.47828	-12.3424	0
NM_031452.3	4.48072	5.10969	0
NM_032376.3	4.48076	-24.6016	0
NM_001001522.1	4.48147	-2.53531	1
NM_001242844.1	4.48177	2.61518	0
NM_032382.4	4.48185	-1.14016	1
NM_005334.2	4.48227	-4.15707	1
NM_002079.2	4.48356	-0.912375	1
NM_153329.3	4.48474	-12.3346	2
NM_013240.5	4.48476	-4.06455	2
NM_006252.3	4.485	-5.19341	1
NM_001077516.1	4.48547	1.7432	1
NM_134270.2	4.48682	-11.565	1
NM_032834.3	4.48796	-14.5225	0
NM_001242501.1	4.48828	-18.147	1
NM_153819.1	4.49234	-4.85236	1
NM_015622.5	4.49277	0.369318	1
NM_144643.3	4.49515	-4.08672	1
NM_006055.2	4.49587	-8.4952	1
NM_005598.3	4.49986	5.86274	0
NM_018128.4	4.5023	1.94068	1
NM_004946.2	4.503	-2.73953	1
NM_022819.3	4.50359	-1.88731	1
NM_012206.3	4.50637	-1.32461	0
NM_024036.4	4.50695	1.86734	0
NM_024704.4	4.51217	-9.80578	0
NM_030581.3	4.51223	-5.04261	2
NM_006923.3	4.51273	1.76338	1
NM_004441.4	4.5137	-4.95622	0
NM_004297.3	4.5142	-5.62391	0
NM_022054.3	4.51449	0.0367202	0
NM_001262.2	4.51484	-1.91475	1
NM_002641.3	4.51815	2.83117	1
NM_004697.4	4.51854	-4.14609	1
NM_006134.6	4.52324	-2.90367	2
NM_006893.2	4.5233	-6.90726	1
NM_000800.4	4.52548	3.6679	1
NM_175876.4	4.53029	3.56068	0
NM_032027.2	4.53049	-8.01966	1
NM_020466.4	4.53056	-0.800063	1
NM_138729.3	4.53074	-14.773	1
NM_198273.2	4.53332	-9.1126	1
NM_004373.3	4.53468	-10.8087	0
NM_017957.2	4.53511	3.28649	1
NM_001003760.4	4.53554	-4.5949	1
NM_078480.2	4.54055	2.2595	1
NM_004110.5	4.54081	-1.44557	1
NM_014706.3	4.54188	0.398936	1
NM_001424.5	4.54241	-2.32484	1
NM_002040.3	4.54378	-16.7184	1
NM_001190265.1	4.54529	-14.5861	1
NM_001743.5	4.54757	-2.17716	1
NM_001997.4	4.54844	-3.38052	1
NM_032359.3	4.54856	-8.48285	1
NM_001302348.1	4.55273	-7.59768	1
NM_173083.3	4.55625	5.82121	0
NM_000387.5	4.55671	-2.22075	0
NM_001278482.1	4.55836	-0.0901479	1
NM_003972.2	4.56329	-1.79183	1
NM_005652.4	4.56413	2.63536	0
NM_001013698.2	4.56439	-9.38264	1
NM_021219.3	4.565	-9.83962	1
NM_145262.3	4.56554	4.16703	0
NM_002893.3	4.56612	1.70143	0
NM_004082.4	4.56757	0.0207524	0
NM_003347.3	4.5684	-6.7612	0
NM_001077351.1	4.56955	-2.67377	1
NM_001162491.1	4.57236	-1.44038	1
NM_006036.4	4.57295	1.8656	2
NM_024299.2	4.57437	-2.64187	0
NM_001164458.1	4.57596	-1.35705	1
NM_144645.3	4.5763	-11.0709	1
NM_152670.2	4.57675	-12.2829	0
NM_004738.4	4.5778	-1.26853	1
NM_001178111.1	4.57887	3.41641	2
NM_001184819.1	4.58042	4.08948	0
NM_002875.4	4.58069	0.30697	0
NM_014421.2	4.58165	-13.2731	0
NM_004794.2	4.58184	0.505431	1
NM_032951.2	4.58346	-19.7074	0
NM_144579.2	4.58528	-2.05253	1
NM_152598.3	4.58543	-23.0108	1
NM_003477.2	4.58973	-0.443329	2
NM_001077654.2	4.58983	-2.4213	1
NM_001012754.3	4.59164	-8.90963	1
NM_022078.2	4.59175	-4.7651	1
NM_014991.4	4.59319	-0.965926	0
NM_001320140.1	4.59398	-8.4756	1
NM_000826.3	4.59632	-1.50082	0
NM_012210.3	4.59794	-15.552	1
NM_032982.3	4.60005	1.45098	0
NM_175744.4	4.60211	-1.7923	1
NM_004853.2	4.60258	1.9535	1
NM_001243783.1	4.60261	-8.5488	0
NM_013446.3	4.60308	-24.7416	0
NM_024529.4	4.60399	-1.27023	1
NM_015548.4	4.60454	-5.72044	1
NM_015462.4	4.6052	-0.915798	2
NM_012437.5	4.6065	-1.58657	1
NM_000705.3	4.6077	-10.0081	0
NM_001319066.1	4.6081	2.95347	1
NM_194248.2	4.60905	-0.934019	1
NM_030939.4	4.60916	8.59497	0
NM_018972.2	4.60961	2.82907	1
NM_002692.3	4.61022	-12.4105	1
NM_032509.3	4.61189	-8.44058	1
NM_133502.2	4.61314	0.972857	1
NM_005104.3	4.61346	0.340045	1
NM_020247.4	4.61768	1.7839	0
NM_001693.3	4.62129	-4.01984	0
NM_003795.5	4.62268	-6.45652	1
NM_006429.3	4.62406	-6.72087	0
NM_015267.3	4.62421	-2.4	1
NM_015514.1	4.62422	4.43944	0
NM_177398.3	4.62612	-2.86233	0
NM_001184749.2	4.63159	1.08397	1
NM_031296.2	4.63215	-2.10646	0
NM_001080416.3	4.63433	-1.63323	1
NM_012102.3	4.63531	-1.14298	1
NM_001290187.1	4.63669	-0.748456	0
NM_006533.3	4.63709	-10.1749	0
NM_001013620.3	4.63905	-14.5812	0
NM_013255.4	4.64113	0.90811	1
NM_024409.3	4.64244	-5.24639	0
NM_001282858.1	4.64447	3.46071	1
NM_004982.3	4.64568	0.520778	1
NM_001323552.1	4.64768	1.10843	1
NM_003442.5	4.649	2.29974	0
NM_001304438.1	4.64905	-2.32197	0
NM_020871.3	4.64954	-3.3286	1
NM_014770.3	4.65295	-17.5448	1
NM_020199.2	4.65519	-1.35632	0
NM_012138.3	4.65544	-14.1343	1
NM_203284.2	4.65547	-0.855578	0
NM_003017.4	4.65587	-22.0932	1
NM_001098638.1	4.6601	-2.25007	1
NM_020933.4	4.66095	1.9176	1
NM_032373.4	4.6612	-5.76877	2
NM_000884.2	4.66154	4.99828	1
NM_005741.4	4.66257	1.6349	1
NM_006947.3	4.66344	3.9749	1
NM_005105.4	4.6636	-6.36014	0
NM_020445.5	4.66531	-1.33357	2
NM_153271.1	4.66578	-6.00777	1
NM_032735.2	4.66763	-8.79154	1
NM_138706.4	4.66848	-9.23514	0
NM_001077195.1	4.66943	2.51438	0
NM_198679.1	4.66977	-1.78831	1
NM_001258430.1	4.67006	4.63162	1
NM_021959.2	4.67152	-2.72662	2
NM_001114118.2	4.67158	-11.1563	0
NM_133471.3	4.67184	-6.30001	0
NM_014047.2	4.67266	1.80318	1
NM_014811.3	4.67356	-11.8845	0
NM_006366.2	4.67392	2.26651	0
NM_002790.3	4.67398	-6.85945	1
NM_005070.3	4.6741	2.56054	1
NM_000860.5	4.67451	-16.1224	1
NM_018154.2	4.67465	-10.9291	1
NM_016390.3	4.67482	-1.2025	2
NM_013390.2	4.67622	-22.7539	1
NM_004333.4	4.67806	-3.60436	0
NM_015159.2	4.6787	-2.41468	1
NM_001278119.1	4.67923	1.04682	1
NM_012153.5	4.68036	-3.26081	0
NM_003099.4	4.68321	2.4415	1
NM_181646.3	4.68334	4.24753	1
NM_001325.2	4.68463	-8.41618	1
NM_020142.3	4.68631	-2.9253	0
NM_016213.4	4.68731	-8.39486	1
NM_182920.1	4.68874	-1.73844	0
NM_005656.3	4.68984	-0.407383	1
NM_152660.2	4.69206	-2.10237	2
NM_018683.3	4.69238	-17.1603	2
NM_001001433.2	4.69335	-8.35013	1
NM_005028.4	4.69443	-2.20446	0
NM_203401.1	4.69583	-9.65128	1
NM_021807.3	4.6979	0.898977	1
NM_005429.4	4.70258	-8.78063	1
NM_001261.3	4.70542	-2.59856	1
NM_182520.2	4.7065	1.26576	0
NM_003564.2	4.70673	-4.03161	1
NM_001130042.1	4.71191	-20.2663	0
NM_001189.3	4.71253	-1.41226	0
NM_001258316.1	4.71295	-13.9835	1
NM_001130845.1	4.7152	-6.58085	1
NM_015161.2	4.71555	0.248134	2
NM_002710.3	4.71569	-3.58281	1
NM_004282.3	4.71646	3.14813	0
NM_002818.2	4.72079	-1.48145	1
NM_013308.3	4.72352	4.07303	0
NM_001010923.2	4.72384	-25.0063	1
NM_033419.4	4.72393	-7.19982	0
NM_138796.3	4.72531	1.00058	1
NM_015442.2	4.72568	0.0665413	1
NM_003204.2	4.72717	-8.81745	1
NM_006466.3	4.7291	-1.86547	2
NM_174899.4	4.73246	-13.0471	2
NM_032177.3	4.73702	-5.48355	0
NM_016485.4	4.73717	2.81301	1
NM_013437.4	4.73749	1.27752	1
NM_002221.3	4.7384	-7.79379	1
NM_003800.4	4.74011	1.8636	0
NM_152332.5	4.74126	-0.413659	2
NM_001985.2	4.74157	-0.67054	1
NM_005792.2	4.74226	-14.9259	0
NM_002583.2	4.74323	-0.625448	0
NM_000373.3	4.74844	3.51955	1
NM_001010867.3	4.74849	-1.36473	1
NM_005314.2	4.75238	-3.13681	1
NM_173694.4	4.75312	-1.88328	0
NM_000917.3	4.75434	-0.0018463	0
NM_000380.3	4.75581	-6.18188	0
NM_003934.1	4.75924	-1.1997	0
NM_017759.4	4.75934	-42.0396	1
NM_152927.2	4.7604	-0.216854	1
NM_006623.3	4.7607	-1.14336	1
NM_030907.3	4.76356	4.68474	0
NM_001568.2	4.76405	-1.04893	1
NM_001005473.2	4.76417	-2.58879	0
NM_001191060.1	4.76707	2.94453	1
NM_001270508.1	4.7722	1.46715	0
NM_003505.1	4.77367	-0.446038	0
NM_030918.5	4.77467	-0.623573	1
NM_004520.4	4.77582	1.06639	1
NM_004580.4	4.7786	-11.6046	1
NM_001625.3	4.77873	0.273536	0
NM_207111.3	4.78093	0.347646	1
NM_016478.4	4.78106	-11.574	1
NM_181783.3	4.78339	-30.6147	1
NM_006708.2	4.78874	0.700047	0
NM_198450.5	4.79074	2.24897	0
NM_001357.4	4.79347	-22.6169	1
NM_001098844.2	4.79411	-8.6123	1
NM_000449.3	4.7966	-0.156708	1
NM_004300.3	4.80179	-6.69847	1
NM_017958.2	4.80499	-6.1783	1
NM_014377.1	4.80559	-1.54305	2
NM_000960.3	4.8058	-0.817824	0
NM_138444.3	4.80926	-13.1904	0
NM_020470.2	4.81231	-3.53498	1
NM_002337.3	4.81608	-8.51526	0
NM_130809.4	4.81629	-9.41689	0
NM_024930.2	4.82267	-17.9302	1
NM_006833.4	4.8236	-3.27381	0
NM_148414.2	4.82595	2.63612	0
NM_006732.2	4.82816	-7.38297	0
NM_002106.3	4.83027	-1.42026	1
NM_007280.1	4.8311	-9.96504	0
NM_001018072.1	4.83225	-16.1053	1
NM_015085.4	4.83409	-16.0671	2
NM_001128830.3	4.83467	-2.12461	1
NM_017619.3	4.83593	-2.55866	2
NM_015503.2	4.83782	-16.7569	1
NM_004588.4	4.84305	-7.10667	1
NM_006544.3	4.84521	-8.56177	1
NM_152640.4	4.84636	-4.10865	1
NM_032682.5	4.84728	14.7852	0
NM_144629.2	4.84888	-1.90453	1
NM_000793.5	4.84917	-7.30222	1
NM_173355.3	4.84924	-6.29524	0
NM_004616.2	4.85034	-18.1452	0
NM_004171.3	4.8514	-3.55429	0
NM_001161.4	4.85502	-2.69127	2
NM_152787.4	4.8567	-10.4662	1
NM_203374.1	4.85894	-2.69506	1
NM_005850.4	4.85936	-2.11053	1
NM_052942.3	4.85988	-5.36976	0
NM_019008.5	4.86024	0.735628	1
NM_001244705.1	4.86124	-21.0963	1
NM_021620.3	4.86909	-17.6088	0
NM_000671.4	4.87157	-5.57528	1
NM_172159.3	4.87512	-2.04214	1
NM_021078.2	4.87647	-5.14318	1
NM_000992.2	4.87731	8.57482	2
NM_001278359.1	4.87746	-9.98215	0
NM_003784.3	4.88098	-5.18363	1
NM_003363.3	4.88206	-8.13689	1
NM_006265.2	4.88321	-9.20817	1
NM_022728.3	4.8839	-26.4297	1
NM_014186.3	4.88525	1.79337	1
NM_001267775.1	4.88671	-15.9424	1
NM_005780.2	4.89069	-21.7858	0
NM_058230.2	4.89084	-2.28287	1
NM_018146.3	4.89257	0.330225	0
NM_003042.3	4.89328	-1.44591	1
NM_000442.4	4.89485	-1.60578	0
NM_001323041.1	4.90118	-3.92447	1
NM_000530.7	4.90175	-11.9391	1
NM_178566.4	4.90883	-7.56677	1
NM_006899.4	4.91251	-6.67437	2
NM_002622.4	4.91333	-1.29151	1
NM_001305.4	4.91418	-1.01119	0
NM_030945.3	4.91422	2.8746	1
NM_024541.2	4.91633	-3.5542	0
NM_002013.3	4.92165	-0.911647	1
NM_015340.3	4.92221	-14.9959	1
NM_031274.4	4.92283	4.56309	0
NM_006793.4	4.92462	-1.85263	1
NM_004429.4	4.92526	-2.77986	0
NM_000890.3	4.92708	-1.15542	1
NM_018416.2	4.92986	-5.10846	1
NM_002427.3	4.93085	0.820021	1
NM_001762.3	4.93234	0.140914	0
NM_018135.3	4.93369	-0.358361	1
NM_016630.6	4.93745	-24.5749	1
NM_020307.3	4.93813	-10.9683	0
NM_001984.1	4.94179	2.28781	1
NM_031307.3	4.94386	1.86824	1
NM_001135629.2	4.9457	-20.5644	1
NM_001030287.3	4.94586	-2.22637	0
NM_032139.2	4.94633	-40.817	1
NM_000368.4	4.94701	-1.60165	1
NM_001135647.1	4.94785	-18.2213	1
NM_002541.3	4.9507	0.605476	1
NM_001114309.1	4.95146	0.564959	0
NM_006993.2	4.95569	-3.1317	0
NM_001012.1	4.95846	-0.0125962	1
NM_013260.7	4.95909	2.66342	1
NM_020209.3	4.9615	-4.81412	1
NM_003496.3	4.96303	-13.3638	0
NM_032773.3	4.96343	-2.39165	2
NM_033427.2	4.96383	-8.88931	1
NM_003863.3	4.969	-2.0937	1
NM_153646.3	4.96909	0.936358	0
NM_014976.1	4.97011	-4.94007	0
NM_000954.5	4.97184	-8.66322	0
NM_001146265.1	4.97213	7.43974	1
NM_001026.4	4.97219	-11.4533	0
NM_022144.2	4.97792	-2.84142	1
NM_003358.2	4.97906	7.32534	0
NM_001199873.1	4.98022	-0.0635383	0
NM_006798.4	4.9808	3.66451	1
NM_004952.4	4.98087	-3.82841	1
NM_144708.3	4.98236	2.2212	1
NM_001099780.1	4.98261	0.732156	1
NM_001011713.2	4.98413	0.810171	1
NM_001304536.1	4.98793	-8.87486	1
NM_006626.5	4.98817	-6.1432	1
NM_016141.3	4.99338	-1.41005	1
NM_018622.6	4.99348	-5.25173	2
NM_033082.3	4.99633	-2.57924	2
NM_001308027.1	4.99817	-1.62028	0
NM_006062.2	4.99855	-2.63866	0
NM_003627.5	5.00126	-16.4974	0
NM_004640.6	5.00449	-2.65105	1
NM_004093.3	5.00519	-17.1321	0
NM_032819.4	5.00623	-3.21771	0
NM_019887.5	5.01117	3.65155	2
NM_032025.4	5.01223	-17.5716	0
NM_001145301.2	5.01397	5.0721	1
NM_001206427.1	5.0143	-8.94148	1
NM_001142640.1	5.01442	4.70526	1
NM_018259.5	5.01924	1.22285	0
NM_005371.5	5.01975	-0.496922	0
NM_001001346.3	5.02075	-10.8221	1
NM_001284364.2	5.02507	0.0971026	0
NM_033251.2	5.02578	4.49634	1
NM_198514.3	5.02623	6.1922	2
NM_030665.3	5.02819	5.21662	1
NM_001298.2	5.0321	5.07956	1
NM_014820.4	5.03228	1.07137	2
NM_001270.2	5.03231	-25.76	1
NM_004550.4	5.03366	-1.34905	1
NM_178040.3	5.04051	-29.418	1
NM_012201.5	5.04229	2.0469	0
NM_001034116.1	5.04548	-1.90491	0
NM_033631.3	5.04606	-8.9712	1
NM_175748.3	5.04705	-1.33121	1
NM_015284.3	5.04793	-18.1091	0
NM_007013.3	5.04893	-17.4266	1
NM_001610.3	5.05124	-5.86705	0
NM_016002.2	5.0514	-10.4395	1
NM_014183.3	5.05146	-5.32926	0
NM_006322.5	5.05171	-4.56924	1
NM_015275.2	5.05478	-19.9238	1
NM_000108.4	5.05595	-2.64622	1
NM_007234.4	5.05628	-8.48095	1
NM_024818.4	5.05781	-1.91408	0
NM_001321988.1	5.05857	-18.3983	0
NM_003609.4	5.05976	1.35984	0
NM_001850.4	5.06078	-0.106102	1
NM_014752.2	5.06203	-12.301	1
NM_152293.2	5.06337	7.46376	0
NM_032608.6	5.06373	-1.16446	0
NM_003054.4	5.07292	3.94814	0
NM_006070.5	5.07455	5.2841	1
NM_014454.2	5.08175	-1.06423	1
NM_001697.2	5.08196	0.167651	2
NM_001324403.1	5.08311	4.02734	1
NM_019040.4	5.08344	-1.4977	1
NM_052925.3	5.08576	-8.04732	0
NM_014016.4	5.08656	-16.8998	1
NM_015367.3	5.08702	5.03773	1
NM_015562.1	5.08899	-11.4139	0
NM_004724.3	5.08958	1.2337	0
NM_020458.3	5.09089	-9.28643	0
NM_152401.2	5.09219	0.268397	1
NM_006675.4	5.09336	-28.0699	0
NM_016355.3	5.09445	-4.25889	1
NM_016518.2	5.0953	-4.30421	1
NM_004581.5	5.09777	-14.1856	1
NM_022488.4	5.10017	1.58021	1
NM_001198671.1	5.1013	1.11875	1
NM_006136.2	5.10266	-6.42278	1
NM_006870.3	5.1036	-7.40546	1
NM_018116.3	5.10465	2.32417	1
NM_003296.3	5.10709	-1.77874	1
NM_006178.3	5.10979	-1.29501	0
NM_002714.3	5.11232	-0.306355	1
NM_025153.2	5.11479	3.31558	1
NM_024581.5	5.11518	-3.50325	0
NM_005654.5	5.11875	-0.456838	0
NM_138615.2	5.11941	-1.28995	0
NM_001429.3	5.11943	0.164359	1
NM_001040107.1	5.12318	-2.55994	0
NM_005252.3	5.12357	6.42271	0
NM_004135.3	5.12505	1.15368	1
NM_004521.2	5.12545	-2.82942	0
NM_001144831.1	5.12594	0.8433	0
NM_012477.3	5.13273	-2.44301	1
NM_182969.2	5.13321	-13.7948	1
NM_001321622.1	5.13391	1.72821	2
NM_198219.2	5.1354	1.36705	1
NM_001039.3	5.13715	-7.82678	0
NM_001454.3	5.13838	-9.55115	1
NM_080667.6	5.13905	-3.52449	2
NM_053285.1	5.13981	-25.4351	1
NM_007024.4	5.14118	0.122161	1
NM_144967.3	5.14442	-1.59844	0
NM_003826.2	5.14486	-1.14126	2
NM_014630.2	5.14891	-4.79834	0
NM_003450.2	5.1557	-2.78622	0
NM_003905.3	5.1571	2.86655	1
NM_006356.2	5.16159	-4.14657	1
NM_016315.3	5.16331	-6.00493	2
NM_015836.3	5.16394	-5.29266	0
NM_015898.3	5.1704	-3.51993	0
NM_000267.3	5.17146	2.50295	2
NM_016578.3	5.17157	3.8008	0
NM_000154.1	5.17215	1.00038	0
NM_002305.3	5.17565	-4.1125	1
NM_145315.4	5.17586	-0.852297	2
NM_012233.2	5.17988	3.20502	2
NM_004251.4	5.18152	-4.78724	1
NM_203298.2	5.18159	-1.24685	0
NM_005883.2	5.1816	-3.96654	0
NM_001039348.2	5.18519	2.82836	0
NM_018702.3	5.18997	-0.223404	2
NM_006209.4	5.1925	3.70257	2
NM_015192.3	5.19483	-4.39184	1
NM_001199835.1	5.19723	-1.01435	1
NM_015702.2	5.20363	-4.69121	1
NM_173472.1	5.20463	-5.51184	2
NM_000322.4	5.20593	-16.1075	0
NM_000635.3	5.21081	2.76746	0
NM_016027.2	5.2116	-3.83461	0
NM_007209.3	5.21201	-3.28321	0
NM_001164761.1	5.21213	-6.14213	0
NM_006913.3	5.22097	-5.56185	2
NM_001199140.1	5.22184	-1.08496	1
NM_014744.2	5.2234	-3.97693	1
NM_015859.3	5.22416	1.76525	1
NM_015047.2	5.22459	4.27148	1
NM_006452.3	5.22589	-15.6659	1
NM_006842.2	5.22682	3.59922	1
NM_014939.3	5.22911	-10.5406	0
NM_014166.3	5.23004	3.80635	0
NM_018975.3	5.23091	-3.94611	0
NM_002592.2	5.23606	-11.0006	0
NM_007014.4	5.2362	-22.893	1
NM_012131.2	5.23687	-6.53144	0
NM_025135.4	5.24142	-4.41026	1
NM_016302.3	5.24631	0.891947	0
NM_138783.3	5.24724	2.27361	1
NM_005019.4	5.26421	-6.71764	0
NM_020892.2	5.26766	6.6298	0
NM_005503.3	5.26906	1.63796	0
NM_015354.2	5.27089	-0.110196	1
NM_031431.3	5.27506	-2.16197	0
NM_014740.3	5.27694	1.7892	0
NM_005599.3	5.28445	-1.25671	0
NM_015601.3	5.28452	2.56704	1
NM_207372.2	5.28535	-0.369377	0
NM_152570.2	5.2868	-2.63463	2
NM_001002258.4	5.28813	-9.8195	1
NM_013374.5	5.28843	-2.10629	1
NM_052910.2	5.291	-0.843771	1
NM_020408.5	5.29173	-3.11766	0
NM_007227.3	5.29192	1.24046	0
NM_004980.4	5.29631	-36.5434	0
NM_007192.3	5.29805	0.0869902	1
NM_002623.3	5.29982	1.75545	0
NM_014723.3	5.30613	-0.221331	0
NM_006979.2	5.30971	1.7432	1
NM_006837.2	5.31319	6.76062	0
NM_032505.2	5.31556	-4.34729	1
NM_001161498.1	5.31684	-6.9026	0
NM_005763.3	5.31703	-0.931369	1
NM_001166005.1	5.31885	-9.34451	1
NM_003385.4	5.32083	-3.25166	0
NM_001145408.1	5.32319	1.1903	1
NM_014674.2	5.32575	4.19597	2
NM_001322374.1	5.32685	0.488259	0
NM_025205.4	5.32841	2.30394	0
NM_006388.3	5.32856	1.10486	1
NM_031442.3	5.331	-4.95121	0
NM_147196.2	5.33209	-3.28693	0
NM_001164161.1	5.33263	4.46373	1
NM_001017405.2	5.33333	-1.82413	0
NM_001002860.3	5.34021	-3.69683	1
NM_016131.4	5.34061	-14.7956	1
NM_006445.3	5.3437	-3.36385	0
NM_004264.4	5.34419	-6.13155	1
NM_004613.3	5.34788	2.94943	1
NM_004403.2	5.35214	-20.1061	1
NM_012333.4	5.35272	-23.7628	1
NM_001032288.2	5.35274	4.47965	1
NM_030914.3	5.35472	-3.74056	1
NM_016524.3	5.35636	-5.50551	2
NM_024082.3	5.35752	-4.17202	1
NM_004739.3	5.3583	1.94762	0
NM_004162.4	5.35983	-4.73811	2
NM_177965.3	5.36119	-21.127	1
NM_212551.4	5.36209	-10.2906	1
NM_018656.2	5.36447	-5.96819	2
NM_001205.2	5.36989	-9.34193	0
NM_001278231.1	5.3703	-4.7017	1
NM_001322495.1	5.37344	-3.94309	1
NM_080476.4	5.37427	-22.3062	1
NM_006415.3	5.37968	-1.26139	0
NM_022776.4	5.37968	2.54221	0
NM_007322.2	5.38016	2.01361	1
NM_018447.3	5.38071	-0.618877	0
NM_005935.3	5.38152	2.96049	1
NM_006301.3	5.38671	-4.19376	1
NM_014956.4	5.39328	-3.01879	1
NM_005738.4	5.39511	-2.54451	1
NM_002666.4	5.39768	-14.907	1
NM_001421.3	5.4032	-7.41157	0
NM_032775.3	5.40681	-7.79054	1
NM_031885.3	5.40769	-18.1153	0
NM_012382.2	5.40943	-8.75452	1
NM_006084.4	5.40981	-1.1143	1
NM_001267547.2	5.41155	-14.575	0
NM_004805.3	5.41314	-12.2916	0
NM_032985.4	5.41321	1.60802	1
NM_152479.5	5.41982	-8.88397	0
NM_012307.3	5.42428	0.304651	0
NM_183373.3	5.43071	5.05324	0
NM_001177.5	5.43296	-2.65348	0
NM_005776.2	5.43488	-20.5242	0
NM_001105520.1	5.43691	-2.14344	2
NM_015556.2	5.43717	-3.71984	1
NM_001039845.2	5.44082	-10.4944	1
NM_032569.3	5.446	0.989777	2
NM_002718.4	5.44736	-5.57149	1
NM_014712.2	5.44976	-6.42151	1
NM_002907.3	5.44976	-6.42151	1
NM_014992.2	5.45545	-0.340823	1
NM_017654.3	5.45711	-0.491166	1
NM_172251.2	5.46108	-4.23305	1
NM_020525.4	5.46786	-0.777654	0
NM_002504.5	5.46917	-6.72479	1
NM_018431.4	5.46949	-8.40481	1
NM_002797.4	5.47081	-0.0128565	1
NM_003625.4	5.47129	-7.48104	0
NM_017665.3	5.47341	-5.17678	0
NM_020830.4	5.47448	8.45338	2
NM_031412.2	5.48742	0.350807	0
NM_199229.2	5.48784	-17.231	0
NM_003621.3	5.48844	-12.1994	1
NM_015509.3	5.50005	2.16605	1
NM_015321.2	5.50049	0.38188	0
NM_004571.4	5.5033	8.90061	0
NM_001618.3	5.50592	1.93327	2
NM_016588.2	5.50796	-2.30576	1
NM_001537.3	5.5082	-4.52019	0
NM_014606.2	5.50868	-9.55512	2
NM_005596.3	5.51169	8.72594	0
NM_005612.4	5.51176	0.640163	0
NM_001301229.1	5.513	-3.45299	0
NM_005370.4	5.52128	5.05135	1
NM_004179.2	5.52681	-3.46052	1
NM_052998.3	5.52741	-6.11436	0
NM_001665.3	5.52781	-1.68894	1
NM_018320.4	5.52823	-12.3699	1
NM_053013.3	5.52923	3.29942	0
NM_001111039.2	5.53109	-1.57089	1
NM_001324459.1	5.53316	-4.85324	0
NM_173794.3	5.53317	-3.32336	1
NM_016072.4	5.53325	4.83241	0
NM_170662.4	5.53384	-19.112	0
NM_002247.3	5.53542	-3.69922	1
NM_018198.3	5.53923	-0.655478	1
NM_022453.2	5.54104	-14.2756	1
NM_017902.2	5.54195	-5.08804	1
NM_012464.4	5.54373	-0.295962	0
NM_032132.4	5.54479	-7.77409	0
NM_020422.5	5.54515	-7.59802	0
NM_130463.3	5.54905	-13.4088	1
NM_018059.4	5.55101	-23.0011	1
NM_014547.4	5.55378	-10.443	1
NM_001033002.3	5.56243	-6.18815	2
NM_002374.3	5.56454	-10.2017	1
NM_005766.3	5.56773	-2.64982	0
NM_001127222.1	5.5689	-2.28847	0
NM_001002759.1	5.57008	-0.234568	0
NM_001135254.1	5.57447	2.17441	0
NM_016059.4	5.57582	1.62314	0
NM_152464.2	5.57588	-7.4546	1
NM_005768.5	5.57631	-1.01768	0
NM_002952.3	5.58052	-9.16995	1
NM_006836.1	5.58385	1.35317	1
NM_032784.4	5.58408	-24.6459	0
NM_172225.1	5.5859	-3.9561	0
NM_012431.2	5.58986	0.787752	0
NM_001197129.1	5.59006	3.48167	0
NM_004741.4	5.59192	-1.2227	1
NM_014034.2	5.59256	2.31735	1
NM_014342.3	5.59607	-4.04108	0
NM_005226.3	5.60096	-16.4562	0
NM_012384.4	5.60523	-8.46654	0
NM_178009.4	5.60782	0.806289	1
NM_023037.2	5.61095	7.90488	0
NM_014748.3	5.61204	-15.2756	1
NM_001256240.1	5.61827	2.26296	1
NM_002779.4	5.62178	-3.91777	0
NM_032175.3	5.62209	1.97539	1
NM_015662.2	5.62218	0.13806	1
NM_014319.4	5.63166	-10.2931	1
NM_000192.3	5.63166	-12.3215	0
NM_021088.3	5.63187	-4.70364	2
NM_006413.4	5.63465	2.60743	1
NM_000390.3	5.63816	-16.246	1
NM_001290215.2	5.64038	-0.953158	0
NM_001015001.2	5.64167	-9.22054	0
NM_006042.2	5.64273	-10.1836	0
NM_004280.4	5.64318	-2.23712	1
NM_020725.1	5.65833	4.80462	0
NM_004067.3	5.66182	-9.93693	1
NM_001307.5	5.66267	2.99355	0
NM_181503.2	5.66933	-4.59126	1
NM_001320930.1	5.66979	-10.0876	1
NM_004482.3	5.67401	-14.4699	0
NM_004645.2	5.67635	-7.48639	2
NM_033429.2	5.68403	5.69512	0
NM_004456.4	5.68872	-21.3587	0
NM_005466.3	5.6909	-17.845	1
NM_005956.3	5.69265	2.33686	1
NM_016016.3	5.69839	-10.4935	0
NM_005941.4	5.6996	-26.4408	2
NM_016143.4	5.70155	-20.3029	1
NM_001988.3	5.7032	-8.79299	0
NM_003455.3	5.70555	-10.3596	0
NM_005118.3	5.70593	3.31339	0
NM_201515.1	5.708	-0.87181	0
NM_015397.3	5.70889	-0.409497	1
NM_005658.4	5.71221	-3.30915	1
NM_015358.2	5.71365	-0.572323	1
NM_002674.3	5.718	-2.84418	0
NM_005789.3	5.71884	-0.377065	1
NM_152731.2	5.72309	-4.65426	1
NM_005139.2	5.7346	-32.5381	1
NM_022915.3	5.73631	2.4074	1
NM_020776.1	5.73738	-6.9125	1
NM_006364.3	5.74158	-0.410641	1
NM_001025090.1	5.74271	-4.98945	0
NM_015414.3	5.74503	-0.789534	0
NM_001415.3	5.74574	-27.1914	1
NM_014280.2	5.74669	-6.86208	0
NM_152376.4	5.74982	7.12561	0
NM_003968.3	5.75199	-9.3525	1
NM_033063.1	5.75465	-15.6778	1
NM_205847.2	5.75636	-7.04427	0
NM_001105207.2	5.76045	-1.36678	2
NM_032900.5	5.76053	-6.04966	1
NM_002254.6	5.76466	-3.68807	0
NM_032750.2	5.76768	-16.9589	1
NM_018383.4	5.76823	-13.8082	0
NM_001003801.1	5.77208	-13.2253	1
NM_006895.2	5.77775	-13.6145	0
NM_001100409.2	5.78169	-2.83104	1
NM_020357.2	5.78191	-4.89499	1
NM_001005.4	5.78263	-0.32205	1
NM_001455.3	5.78274	-7.93236	0
NM_016041.4	5.78608	-0.778177	2
NM_001098616.2	5.78732	-10.4067	1
NM_015176.3	5.79014	0.020112	0
NM_024667.2	5.79572	-1.08635	0
NM_017667.3	5.80177	-6.4695	0
NM_001205248.1	5.8043	4.88723	0
NM_002495.3	5.80784	2.03748	0
NM_018244.4	5.80824	6.93065	2
NM_022169.4	5.8102	3.51243	0
NM_015965.6	5.81029	-4.78518	0
NM_032918.2	5.81145	0.861021	1
NM_021103.3	5.81529	1.46966	0
NM_007193.4	5.82028	-0.263057	1
NM_005645.3	5.82355	-8.24184	1
NM_004529.3	5.82893	-22.8385	0
NM_003001.3	5.84174	3.16866	1
NM_004027.2	5.84282	-0.67205	1
NM_001202485.1	5.84714	3.76167	0
NM_001198879.1	5.85507	-8.31369	0
NM_005566.3	5.85525	8.11766	0
NM_145239.2	5.85652	-0.416544	0
NM_022087.3	5.85731	-4.274	1
NM_002430.2	5.86248	-0.52401	0
NM_001286831.1	5.86473	-18.566	1
NM_133496.4	5.86576	0.701617	1
NM_014663.2	5.86898	0.917631	0
NM_181468.2	5.87064	-11.5644	0
NM_014315.2	5.87403	-4.65631	1
NM_015567.1	5.87688	7.0071	0
NM_003135.2	5.88666	4.54395	1
NM_006530.3	5.88823	8.31046	0
NM_005772.4	5.88937	-8.87962	1
NM_006221.3	5.89428	-16.1878	0
NM_002045.3	5.89957	-31.8848	0
NM_006369.4	5.90212	-2.57529	0
NM_183323.2	5.90234	-5.53449	0
NM_018047.2	5.90251	-1.83888	1
NM_000919.3	5.90708	-2.13828	1
NM_006112.3	5.90777	-14.6308	1
NM_017994.4	5.91461	-18.6298	0
NM_007043.6	5.91527	0.644536	1
NM_005419.3	5.91848	-1.10789	0
NM_016272.3	5.92451	-0.83333	1
NM_001242903.1	5.92793	-5.26246	0
NM_018394.3	5.93031	-5.10154	0
NM_020922.4	5.93033	-7.6044	1
NM_003146.2	5.93163	-10.6416	0
NM_002107.4	5.93478	-10.6453	1
NM_014517.4	5.94498	-1.48846	0
NM_017915.4	5.94777	-3.84196	0
NM_024779.4	5.95061	-4.57968	1
NM_016277.4	5.95585	-4.1236	0
NM_014191.3	5.95882	1.51882	1
NM_198318.4	5.96079	0.576899	0
NM_014217.3	5.96197	-8.14762	1
NM_001822.5	5.9676	-2.26637	1
NM_003220.2	5.97274	-5.70198	1
NM_001174097.2	5.97332	11.7589	0
NM_004567.3	5.97384	-17.7367	0
NM_033400.2	5.97803	-4.19733	1
NM_001211.5	5.97917	-0.895443	0
NM_001099645.1	5.98028	-2.38753	1
NM_033549.4	5.98097	2.88681	0
NM_018915.3	5.98643	-1.92527	1
NM_000492.3	5.9868	3.82907	2
NM_001085487.2	5.98785	-8.07735	1
NM_016144.3	5.99071	-0.0867554	0
NM_001163523.1	5.99123	2.03067	0
NM_024050.5	5.99251	3.60678	2
NM_015116.2	5.99393	-4.36912	0
NM_020854.3	5.99513	4.2617	0
NM_013986.3	5.99521	-2.5761	1
NM_181481.4	5.99622	-2.14878	1
NM_005175.2	6.00737	-9.56587	1
NM_015123.2	6.00739	-12.2006	0
NM_018717.4	6.01068	4.0471	1
NM_006951.4	6.01301	3.67338	1
NM_153333.2	6.01796	-1.1427	1
NM_004118.3	6.01813	4.7425	0
NM_001305203.1	6.01997	-2.64357	1
NM_001321018.1	6.02376	1.62493	1
NM_001142725.1	6.02512	-4.57036	1
NM_001282735.1	6.03042	0.478445	1
NM_173811.3	6.03105	-9.32343	1
NM_138792.3	6.0313	-4.98081	0
NM_015203.4	6.0333	-8.97109	0
NM_006667.4	6.04115	-0.404003	1
NM_014516.3	6.0464	8.62565	1
NM_032758.3	6.04656	-1.82317	2
NM_001257180.1	6.05044	-5.00476	0
NM_133328.3	6.05245	-0.0318662	1
NM_020990.4	6.06123	-9.82322	0
NM_006706.3	6.06322	9.36743	0
NM_004385.4	6.06811	-28.8943	2
NM_016166.2	6.0777	-6.77619	0
NM_001025071.1	6.07872	0.974385	1
NM_022171.2	6.08047	-3.39998	0
NM_006424.2	6.0828	-3.83237	1
NM_017646.5	6.08408	-4.51454	0
NM_016080.3	6.08426	-3.60389	0
NM_032353.3	6.08718	-0.671726	0
NM_003907.2	6.08918	-4.49862	1
NM_000334.4	6.09041	-7.60702	0
NM_001039753.2	6.09462	-8.13803	2
NM_004523.3	6.09559	2.51654	2
NM_004163.4	6.09764	-5.54128	1
NM_003848.3	6.09842	6.14857	2
NM_002872.4	6.09906	-6.17969	1
NM_003753.3	6.10303	-12.7883	0
NM_002857.3	6.1035	-14.2291	1
NM_006147.3	6.10382	-4.15832	1
NM_001004304.3	6.10393	2.74184	0
NM_032437.3	6.10951	1.49437	1
NM_001160223.1	6.10984	-21.1907	1
NM_181361.2	6.11122	-17.9831	2
NM_078471.3	6.11506	-7.96973	0
NM_015934.4	6.11582	-15.1505	1
NM_002940.2	6.11736	3.96627	1
NM_016287.3	6.1178	-6.61314	0
NM_001277062.1	6.12197	-4.89533	0
NM_006997.3	6.12295	-2.26107	0
NM_001114122.2	6.13008	-11.748	1
NM_023039.4	6.13152	-12.3477	0
NM_001286067.1	6.13244	-14.2973	1
NM_001551.2	6.13389	1.9338	0
NM_005872.2	6.1381	-24.9778	1
NM_015110.3	6.14107	-4.6201	0
NM_001584.2	6.14419	-9.25488	1
NM_032549.3	6.15642	-0.599647	0
NM_000993.4	6.15777	-1.76701	1
NM_000859.2	6.15822	-6.35748	0
NM_002951.4	6.16715	1.23002	1
NM_001423.2	6.168	4.86549	0
NM_020137.4	6.19075	-17.0183	0
NM_003350.2	6.19308	2.04386	1
NM_013234.3	6.20342	3.92669	0
NM_018229.3	6.21137	-6.1062	1
NM_005536.3	6.21725	3.5654	2
NM_006721.3	6.219	4.55709	0
NM_015365.2	6.23184	-1.94235	0
NM_002028.3	6.23717	-8.33547	1
NM_005862.2	6.24794	-7.12922	1
NM_152236.2	6.25667	-0.600468	0
NM_001320537.1	6.26234	-22.3752	1
NM_014742.3	6.26864	-3.35775	0
NM_001303256.2	6.27402	3.38127	1
NM_000307.4	6.27445	-18.1872	1
NM_005439.2	6.2762	-17.8252	0
NM_001130864.1	6.28439	-4.18386	0
NM_000080.3	6.29055	3.18792	1
NM_001002862.2	6.29727	4.61987	0
NM_001081550.1	6.30316	-13.1265	2
NM_001257359.1	6.30509	-14.9333	1
NM_005002.4	6.30645	-2.62917	0
NM_152769.2	6.3079	0.672629	0
NM_004615.3	6.30941	-0.109022	0
NM_024093.2	6.30972	-3.42889	1
NM_031427.3	6.31531	2.89816	2
NM_194279.3	6.3317	-25.8679	2
NM_014913.3	6.3342	-1.46117	2
NM_015093.5	6.33542	-18.9318	1
NM_012325.2	6.33942	0.0837263	1
NM_001013625.3	6.34282	2.20365	1
NM_207293.1	6.34303	9.50867	2
NM_016559.2	6.34516	1.79323	0
NM_001361.4	6.34556	-3.77574	1
NM_183005.4	6.34676	2.37963	0
NM_005966.3	6.35377	-25.4892	1
NM_001030005.2	6.35944	-20.7322	0
NM_003076.4	6.3599	0.367952	0
NM_005897.2	6.36252	-7.77167	1
NM_006583.2	6.3765	0.0861536	1
NM_001198812.1	6.38077	-0.914306	1
NM_001938.2	6.38468	3.15698	1
NM_147190.3	6.3913	-5.67076	1
NM_032141.3	6.39328	6.76401	1
NM_014844.4	6.39602	-6.8867	1
NM_017575.4	6.39812	-0.323843	0
NM_173560.3	6.40058	3.29859	0
NM_152495.1	6.40213	-21.6822	0
NM_003654.5	6.41009	5.45992	2
NM_002023.4	6.41332	3.03319	1
NM_001039770.2	6.41446	-15.428	0
NM_001320808.1	6.41995	-3.19431	0
NM_014994.2	6.42287	4.18582	1
NM_197956.3	6.43092	2.225	0
NM_016154.4	6.43492	-0.288587	2
NM_005653.4	6.43761	-26.6673	1
NM_002545.4	6.44119	-7.2389	1
NM_003315.3	6.45433	-0.425199	1
NM_006099.3	6.45867	-10.2265	0
NM_138771.3	6.46641	-5.80549	0
NM_002970.3	6.46762	-0.232725	1
NM_005447.3	6.47983	-3.82029	0
NM_013254.3	6.48287	-1.46341	1
NM_012394.3	6.48337	-3.94609	0
NM_001270989.1	6.50293	1.18491	0
NM_018208.3	6.51048	0.00724328	2
NM_001244262.1	6.51769	-8.61378	0
NM_004939.2	6.51875	1.42387	0
NM_000234.2	6.52485	-0.284964	0
NM_006237.3	6.52513	-1.85404	0
NM_001827.2	6.52648	-1.85949	1
NM_018994.2	6.53965	3.96116	1
NM_181672.2	6.54851	-24.7548	0
NM_003251.3	6.55208	-5.20071	0
NM_033513.2	6.55229	1.14066	0
NM_007022.4	6.55508	-8.31267	0
NM_178000.2	6.55628	1.19927	0
NM_016835.4	6.55984	-3.65424	0
NM_033389.3	6.56046	-4.23667	2
NM_004879.4	6.57556	-23.2796	1
NM_001159699.1	6.57745	-2.6798	0
NM_001317896.1	6.57754	-24.3284	2
NM_033540.2	6.58516	1.83067	1
NM_004964.2	6.58609	3.8018	1
NM_021005.3	6.58946	-0.422132	0
NM_001514.5	6.6088	-27.5342	1
NM_017901.5	6.60991	-11.7521	1
NM_017925.6	6.61128	-2.59131	1
NM_002697.3	6.61152	-2.97053	1
NM_021079.4	6.61399	-3.69133	0
NM_000255.3	6.61988	3.65775	2
NM_002798.2	6.62212	7.32232	0
NM_005968.4	6.62256	-2.83592	0
NM_002721.4	6.63216	1.23984	1
NM_015488.4	6.63757	-4.5027	1
NM_144723.2	6.6386	0.677377	1
NM_018025.2	6.63863	2.96962	1
NM_016328.2	6.6408	-6.52618	0
NM_181715.2	6.65312	-0.158088	0
NM_001301733.1	6.65351	-10.0594	0
NM_025219.2	6.65578	-3.54621	1
NM_001017928.3	6.65706	-4.05393	0
NM_020850.2	6.65975	8.07327	1
NM_004181.4	6.66226	-12.1187	0
NM_012338.3	6.66507	-19.8727	0
NM_058241.2	6.67961	3.54023	0
NM_016616.4	6.68266	-5.0037	1
NM_005859.4	6.6832	-1.48044	0
NM_203290.3	6.68325	-2.01562	0
NM_012343.3	6.68615	-0.990621	1
NM_014797.2	6.6863	-0.875095	1
NM_022483.4	6.69995	-7.62416	1
NM_001042550.1	6.70936	-20.8168	1
NM_000251.2	6.71072	-8.90833	0
NM_006529.3	6.71454	-1.48855	0
NM_004066.2	6.71695	-1.93177	0
NM_058170.3	6.72095	-0.317926	1
NM_001136.4	6.72142	-4.16695	2
NM_015345.3	6.72521	0.973332	1
NM_001039111.2	6.7255	-0.213828	0
NM_005125.1	6.7264	0.925517	0
NM_014397.5	6.73867	-5.8531	0
NM_001099404.1	6.73939	-3.65858	0
NM_016522.2	6.74288	-7.25072	1
NM_005826.4	6.74442	-30.1194	1
NM_002410.4	6.74626	-8.74902	0
NM_016422.3	6.74896	-2.69741	1
NM_005638.5	6.75889	2.02014	1
NM_014895.3	6.75898	-15.2566	1
NM_152344.3	6.76769	7.3567	0
NM_012426.4	6.77337	-0.732697	1
NM_005659.6	6.79997	5.34418	0
NM_001167820.1	6.81285	-13.1536	0
NM_005251.2	6.81939	2.90646	0
NM_138621.4	6.8261	-0.946252	1
NM_005570.3	6.83039	-4.79819	1
NM_025147.4	6.84853	-3.68938	2
NM_033312.2	6.85306	-13.4371	0
NM_053064.4	6.86927	-2.73251	0
NM_002805.5	6.87602	-6.54299	0
NM_022553.5	6.88426	5.06962	0
NM_001261408.1	6.88466	-3.31148	0
NM_001206847.1	6.88497	-4.08495	1
NM_033271.2	6.88642	-2.02644	0
NM_015052.4	6.89649	2.82203	0
NM_206915.2	6.89752	-3.12072	0
NM_015436.3	6.91888	5.38472	1
NM_001143853.1	6.92207	-3.13286	1
NM_014649.2	6.92468	-5.74703	0
NM_006978.2	6.93078	-9.20822	0
NM_002687.3	6.93124	-16.1849	1
NM_025185.3	6.93205	8.29204	0
NM_006268.4	6.93473	2.80073	1
NM_003199.2	6.94229	-1.39002	0
NM_001163809.1	6.9488	-5.38378	0
NM_001876.3	6.95162	-0.4583	1
NM_020156.4	6.96689	-29.6494	2
NM_004319.2	6.9676	12.3666	0
NM_005324.4	6.96974	-0.879885	0
NM_017719.4	6.97803	-1.97921	1
NM_018368.3	6.9875	-12.4499	1
NM_005721.4	6.99382	-5.94694	1
NM_004182.3	6.99499	-20.4836	1
NM_004979.5	6.99601	-3.99886	1
NM_020839.3	7.00394	-9.38347	1
NM_006601.6	7.01011	-2.06969	1
NM_015255.2	7.02158	1.84908	2
NM_024586.5	7.02581	0.330838	0
NM_001904.3	7.03377	-17.4344	0
NM_022456.4	7.0363	-7.88138	1
NM_001077198.2	7.04868	5.74788	1
NM_000134.3	7.05355	1.61344	1
NM_006585.3	7.05509	-2.23499	0
NM_002435.2	7.05529	-1.12619	1
NM_001014764.2	7.06351	-14.2313	0
NM_152267.3	7.06971	1.29032	1
NM_005328.2	7.07143	-10.9328	2
NM_001821.3	7.0729	-12.785	1
NM_174916.2	7.07473	-2.73778	0
NM_004484.3	7.08147	0.0469727	0
NM_138619.3	7.08444	4.77454	2
NM_004496.3	7.08544	-3.24315	0
NM_007359.4	7.08656	5.41234	1
NM_004890.2	7.08884	-13.0003	0
NM_030769.2	7.11105	2.75467	0
NM_003270.3	7.12094	-11.0509	1
NM_004231.3	7.13947	-2.75765	1
NM_019116.2	7.14016	0.830132	1
NM_002109.5	7.14432	0.696339	1
NM_001080415.1	7.14589	-5.48518	1
NM_003081.4	7.15098	-7.7218	0
NM_001042473.3	7.15272	-2.91126	1
NM_001114132.1	7.15671	-37.2282	0
NM_152905.3	7.16529	0.265792	1
NM_139276.2	7.17317	-5.74301	2
NM_014583.3	7.18485	-2.50832	0
NM_001656.3	7.21238	-1.34856	1
NM_014912.4	7.21472	2.76416	1
NM_006666.2	7.22101	-2.00693	1
NM_144664.4	7.22789	-1.65201	2
NM_014110.4	7.22915	-10.8807	1
NM_015589.5	7.23693	9.96958	0
NM_138809.3	7.23945	-3.32372	1
NM_001018025.3	7.24136	-1.77	1
NM_016530.2	7.245	-10.6825	1
NM_138572.2	7.25675	1.65161	0
NM_001142307.1	7.25822	1.04363	1
NM_015107.2	7.25961	1.58972	1
NM_001039802.1	7.2598	-9.43539	1
NM_001025237.1	7.26298	-4.26496	0
NM_000722.3	7.26592	3.4639	2
NM_005259.2	7.28353	-40.0266	0
NM_015023.4	7.28402	-1.50627	1
NM_003463.4	7.28811	-10.7547	0
NM_001107.4	7.29086	-5.12877	1
NM_006952.3	7.29157	-0.46778	1
NM_001098.2	7.30637	-0.400879	1
NM_003100.3	7.31429	-1.83075	1
NM_006380.3	7.32306	-10.329	1
NM_031485.3	7.32364	-10.1146	0
NM_002700.2	7.3248	8.29018	0
NM_019027.3	7.33288	-2.15408	0
NM_003677.4	7.33593	-12.1496	1
NM_005909.4	7.34304	3.34892	2
NM_001286.3	7.35112	-0.200396	1
NM_017846.4	7.35959	-12.8095	0
NM_000061.2	7.37294	-1.97395	1
NM_004854.4	7.37371	-19.9879	2
NM_003481.2	7.3802	-30.4764	0
NM_016221.3	7.38581	-4.58234	2
NM_184234.2	7.40248	1.87064	0
NM_024165.2	7.42665	-1.37053	1
NM_203463.2	7.42967	-2.0636	1
NM_020444.4	7.43865	-4.25742	0
NM_031498.2	7.43978	-2.79165	0
NM_001278438.1	7.45898	-5.91491	1
NM_003954.4	7.46046	-4.877	0
NM_032368.4	7.4636	-4.23279	0
NM_003043.5	7.49244	-0.252128	1
NM_021223.2	7.50303	-7.00511	0
NM_003374.2	7.50963	-15.4212	1
NM_001080826.2	7.51795	-1.67203	0
NM_001080457.1	7.52063	-0.682131	0
NM_001270482.1	7.52756	-3.20656	1
NM_001098801.1	7.53704	-5.02778	2
NM_018969.5	7.54497	-11.2069	1
NM_020715.2	7.55221	8.26044	0
NM_003168.2	7.57639	-0.534749	1
NM_012423.3	7.58133	-3.07758	1
NM_030640.2	7.58978	-13.1302	1
NM_001258462.1	7.59999	-1.68255	1
NM_021970.3	7.67327	-11.1429	1
NM_004929.3	7.67577	-1.80442	0
NM_001258320.1	7.67826	-10.8475	0
NM_033285.3	7.68313	0.60616	0
NM_024662.2	7.68594	4.11941	1
NM_003359.3	7.69368	-2.42548	1
NM_152446.3	7.70643	-3.18961	2
NM_022104.3	7.71078	-9.42676	1
NM_201403.2	7.72315	-0.788844	0
NM_152245.2	7.73682	6.26928	1
NM_017938.3	7.73735	-2.80726	0
NM_002357.3	7.74582	-8.87363	0
NM_020845.2	7.74696	-2.39959	0
NM_012460.3	7.76345	0.862601	0
NM_003922.3	7.76534	-2.61851	0
NM_005749.3	7.79759	-0.611178	1
NM_003642.3	7.80218	-5.23486	0
NM_006336.3	7.82221	2.41485	0
NM_001174156.1	7.8682	1.83196	1
NM_001278163.1	7.89059	-7.24815	1
NM_033394.2	7.90338	0.549377	0
NM_016320.4	7.90639	-7.86656	1
NM_001039591.2	7.92289	2.2262	1
NM_016162.3	7.93022	3.4984	0
NM_022060.2	7.94001	-12.967	1
NM_203418.2	7.96386	-2.78833	1
NM_001970.4	7.96541	-9.67609	1
NM_012115.3	7.96852	-8.17257	1
NM_015032.3	7.97303	-2.39452	1
NM_005759.5	7.97897	-8.07329	0
NM_012478.3	8.00783	-3.04894	0
NM_003297.3	8.04286	-0.087621	0
NM_020438.4	8.04401	0.82596	2
NM_172373.3	8.04462	-5.17944	0
NM_001080508.2	8.05275	0.791545	0
NM_001164380.1	8.05726	-1.44828	0
NM_015378.3	8.05973	-2.65448	1
NM_018362.3	8.07661	0.745357	1
NM_017728.3	8.08473	-10.682	0
NM_032389.4	8.08622	-37.0849	0
NM_015409.4	8.08635	2.64135	1
NM_022337.2	8.09521	-0.341086	0
NM_001024630.3	8.09586	-5.73867	2
NM_022133.3	8.09741	-6.0268	1
NM_015534.5	8.10004	-32.5047	1
NM_001171203.2	8.11547	-8.15776	1
NM_024947.3	8.13396	-4.24592	0
NM_005360.4	8.1418	-1.51767	0
NM_030751.5	8.14334	-3.71398	1
NM_147175.3	8.1441	-9.39201	0
NM_024621.2	8.14564	-9.20905	1
NM_005180.8	8.16251	-6.51468	0
NM_001964.2	8.17706	3.12421	0
NM_178819.3	8.19947	-17.0356	0
NM_006177.3	8.21446	-6.09304	0
NM_018237.3	8.23241	0.0526406	2
NM_018119.3	8.2383	-10.7116	1
NM_032864.3	8.24286	-3.40416	1
NM_006816.2	8.26992	-10.4942	0
NM_006726.4	8.27194	-2.29615	1
NM_001280542.1	8.28651	-21.8486	0
NM_001178.5	8.3075	-10.5565	0
NM_001288718.1	8.33046	-2.18956	0
NM_014781.4	8.3334	-32.4547	1
NM_001287432.1	8.34262	-3.37911	1
NM_014248.3	8.35481	-6.55097	0
NM_024953.3	8.37195	-4.58056	1
NM_181291.2	8.37855	-1.73017	0
NM_001017437.3	8.38936	-18.0448	0
NM_012328.2	8.39189	-25.2272	0
NM_002375.4	8.39385	-8.48417	1
NM_000975.3	8.40275	-10.8105	0
NM_018997.3	8.43037	-6.62283	0
NM_002954.5	8.43788	1.27662	1
NM_000933.3	8.43984	-15.1158	1
NM_172127.2	8.45435	4.08134	2
NM_022136.4	8.55105	-6.98465	1
NM_207299.1	8.55269	9.86087	0
NM_005604.3	8.69769	2.35226	0
NM_001195278.1	8.72151	-5.19712	0
NM_003977.3	8.72491	0.795128	1
NM_053002.5	8.77209	1.21476	1
NM_001282695.1	8.77322	2.20929	1
NM_001273.3	8.77661	-4.1922	0
NM_021032.4	8.79961	-3.97915	0
NM_019006.3	8.81245	-16.222	0
NM_002655.2	8.81449	1.91134	0
NM_000252.2	8.85558	-1.70718	1
NM_032673.2	8.88271	-2.38047	0
NM_000075.3	8.89718	-2.40858	1
NM_005402.3	8.9132	-0.910972	0
NM_005641.3	8.91766	-12.1291	0
NM_002881.2	8.92543	-0.944627	0
NM_006624.5	8.92593	-17.7051	0
NM_006367.3	8.93141	-0.446252	0
NM_000965.4	8.98133	-30.9644	0
NM_017780.3	9.02384	2.77941	0
NM_001031710.2	9.05721	-7.32746	0
NM_012326.3	9.05901	-13.8931	1
NM_000371.3	9.10386	-20.3815	0
NM_001031835.2	9.15248	-3.87433	1
NM_006313.2	9.19393	0.676539	1
NM_001012752.2	9.20763	-3.3747	0
NM_012245.2	9.2206	-3.83384	1
NM_171825.2	9.22134	-1.99898	1
NM_001318841.1	9.2841	-0.255679	1
NM_001127510.2	9.28901	-25.9167	1
NM_006079.4	9.31306	-9.1358	0
NM_003658.4	9.32943	-27.206	0
NM_001173467.2	9.36996	7.95717	1
NM_004730.3	9.3806	6.89124	1
NM_022730.3	9.41684	-18.1138	1
NM_007029.3	9.43309	6.03675	0
NM_001185118.1	9.47847	-0.0200147	1
NM_144778.3	9.4841	8.44036	2
NM_015000.3	9.48971	4.48172	0
NM_006085.5	9.50442	-20.6059	0
NM_024548.3	9.50743	4.84469	2
NM_004215.4	9.54465	0.63469	2
NM_015253.1	9.58058	-1.93082	0
NM_015607.3	9.59739	-2.66345	0
NM_178026.2	9.61407	-8.81944	0
NM_024713.2	9.61941	6.96718	1
NM_004296.6	9.74263	3.65821	0
NM_020395.3	9.81438	-16.821	1
NM_001025105.2	9.85409	-6.96628	1
NM_002748.3	9.89196	-13.6123	0
NM_198268.2	9.89323	0.230945	1
NM_053274.2	9.89378	-6.39727	2
NM_000984.5	9.89877	-3.24223	1
NM_144598.4	9.92507	-3.17923	1
NM_006047.5	9.9859	-9.70221	0
NM_024641.3	10.0264	-6.10744	0
NM_025211.3	10.1192	-1.94493	1
NM_015252.3	10.1922	4.66063	1
NM_007203.4	10.2224	3.31855	2
NM_001242546.1	10.3553	3.98567	0
NM_001017926.2	10.4004	-42.5192	0
NM_000721.3	10.4794	-6.89881	1
NM_020341.3	10.4898	-26.6336	0
NM_032320.6	10.4921	-4.75221	1
NM_001127357.1	10.5029	-9.05567	1
NM_007144.2	10.6273	-3.99446	0
NM_020987.4	10.7267	-11.7673	1
NM_005964.3	10.7496	-7.22736	1
NM_203390.2	10.9383	-9.90082	1
NM_032182.3	11.0235	-20.9703	1
NM_032440.3	11.0833	-25.0047	0
NM_183047.3	11.1464	-7.73691	0
NM_134428.2	11.4787	-1.77562	1
NM_182918.3	11.6269	3.86549	0
NM_014824.2	11.6621	1.63281	0
NM_016516.2	11.8064	2.244	1
NM_001128210.1	11.8414	0.426177	0
NM_015040.3	11.872	-1.10041	1
NM_001130067.1	14.1128	-36.4785	2
NM_021639.4	15.4565	2.66701	1
NM_022913.3	15.8038	3.16466	1
