# Supplementary material for: Translation initiation downstream from annotated start codons in human mRNAs coevolves with the Kozak context
Source: Genome Res. 2020 Jul;30(7):974–84. doi: 10.1101/gr.257352.119 (PMC7397870; doi:10.1101/gr.257352.119)
Supplement: Supplemental Material [file supp_gr.257352.119_Supplemental_Table_S4.xlsx]

## Sheet: Supplemental_Table_S4
Supplemental Table S4. Conserved “weak” set. Constituted by 10% of the mRNAs with the lowest sAUG TIESS.
RefSeq_ID	sAUG_TIESS	fdAUG_TIESS	fdAUG_frame
NM_001159767.1	-55.1218	-6.43526	1
NM_001207067.1	-47.2481	-2.61352	1
NM_006022.3	-45.2748	-7.06379	2
NM_007260.2	-42.3958	-4.20318	0
NM_000942.4	-39.0022	-0.6679	0
NM_018449.3	-38.0463	4.14219	0
NM_145805.2	-35.4539	2.70471	0
NM_000503.5	-33.4748	7.67269	0
NM_020204.2	-32.8902	3.60588	0
NM_005996.3	-32.4884	-7.33185	0
NM_205768.2	-32.3759	-11.2422	1
NM_014647.3	-32.1697	-1.79164	0
NM_014458.3	-32.1244	-8.00902	0
NM_015691.3	-31.3471	-17.8661	0
NM_002525.2	-31.332	-3.54349	0
NM_007217.3	-30.5695	6.98633	0
NM_001135179.1	-29.9846	0.566081	0
NM_016308.2	-29.9421	-4.59165	0
NM_015423.2	-29.2061	-6.26784	0
NM_139159.4	-29.1857	6.8916	0
NM_022118.4	-28.7049	3.81798	0
NM_001173542.1	-28.4668	-5.56752	0
NM_174938.5	-28.2511	-0.295489	0
NM_003400.3	-27.2113	5.48224	0
NM_178496.3	-26.7987	7.78239	0
NM_014868.4	-26.6866	-6.91523	0
NM_001099857.2	-26.5831	-3.71153	0
NM_032160.2	-26.2601	-7.44281	2
NM_172366.3	-26.1543	7.01819	0
NM_000720.3	-25.7848	-0.743116	0
NM_014942.4	-25.7466	3.21786	1
NM_001134734.1	-25.6717	8.66334	0
NM_014015.3	-25.6384	-10.5035	0
NM_025107.2	-25.4669	-19.2592	1
NM_199334.3	-25.4578	-7.15984	1
NM_014620.5	-25.3183	3.3024	0
NM_015921.2	-25.0556	3.02178	0
NM_032024.4	-24.2114	-7.0347	1
NM_001080448.2	-24.2074	2.64229	0
NM_004690.3	-23.775	-2.41917	0
NM_015178.2	-23.6721	-9.55985	0
NM_001319.6	-23.5519	-3.69904	0
NM_014424.4	-23.2982	-8.24765	0
NM_001282062.1	-23.0893	-7.21266	0
NM_006330.3	-22.6914	-2.41129	0
NM_014847.3	-22.6706	-1.31059	0
NM_207119.2	-22.6633	4.51525	0
NM_001136039.2	-22.6211	-13.3108	0
NM_015049.2	-22.4463	-1.25883	1
NM_001029875.2	-22.3452	-5.55339	1
NM_001258419.1	-22.3264	5.79761	0
NM_031303.2	-22.2634	-6.47663	1
NM_001143823.2	-22.0934	4.75313	0
NM_005413.3	-22.0789	-10.4003	0
NM_017686.3	-22.0398	-24.9466	1
NM_001079872.1	-21.9664	-13.5944	1
NM_016122.2	-21.8494	-4.29874	0
NM_005801.3	-21.6983	-10.6454	1
NM_005905.5	-21.6862	-1.68344	1
NM_213606.3	-21.419	2.05753	0
NM_172231.3	-21.3642	-1.01007	0
NM_006717.2	-21.3477	-7.36848	1
NM_001303241.1	-21.0592	1.49704	0
NM_015189.2	-20.9987	5.61407	0
NM_014946.3	-20.8366	5.25192	0
NM_015185.2	-20.7166	9.78713	2
NM_020437.4	-20.5997	-1.81327	0
NM_006658.4	-20.1231	-2.53692	0
NM_001042522.2	-19.9906	4.93273	0
NM_024519.3	-19.9483	0.147932	0
NM_001332.3	-19.889	-3.64832	0
NM_001142418.1	-19.8547	7.63455	0
NM_031954.4	-19.8142	-2.38572	0
NM_012164.3	-19.74	6.42038	2
NM_016519.5	-19.6474	2.47645	0
NM_024630.2	-19.518	-6.43209	0
NM_007005.4	-19.4239	4.15328	0
NM_001978.4	-19.3019	-2.80999	0
NM_016607.3	-19.2994	5.46288	0
NM_012455.2	-19.0289	0.280465	0
NM_005875.2	-19.0272	-10.407	1
NM_001093.3	-19.0174	2.06998	0
NM_181552.3	-18.7148	-11.1933	1
NM_000346.3	-18.6211	-16.2609	0
NM_005097.3	-18.5276	-0.454955	0
NM_207385.1	-18.4101	-9.84786	1
NM_001002914.2	-18.2464	1.79875	0
NM_018999.3	-18.1269	-6.1856	1
NM_002767.3	-18.0525	5.22737	0
NM_017546.4	-18.0376	-1.23163	0
NM_016231.4	-17.78	5.26799	0
NM_001270805.1	-17.7701	2.02326	0
NM_017793.2	-17.757	-5.16009	0
NM_003221.3	-17.6964	8.31269	0
NM_022763.3	-17.6624	3.68885	0
NM_014728.3	-17.6307	-12.7037	1
NM_001085451.1	-17.4765	0.0297281	1
NM_001008537.2	-17.4571	-5.21479	1
NM_133330.2	-17.3897	1.33641	0
NM_001012241.1	-17.3665	-9.8917	0
NM_139245.3	-17.3142	4.05634	0
NM_152450.2	-17.3038	4.13542	0
NM_001173488.1	-17.3028	10.8102	0
NM_144949.2	-17.2186	-6.70247	0
NM_030621.4	-17.1918	9.29091	0
NM_005585.4	-17.1509	4.87131	1
NM_004992.3	-17.0091	1.075	0
NM_030759.4	-16.9363	-3.38054	0
NM_145166.3	-16.935	2.26639	0
NM_032840.2	-16.8473	-5.03307	0
NM_001099402.1	-16.8373	2.07569	2
NM_024007.4	-16.8372	-0.286824	0
NM_001128219.2	-16.7754	-28.3933	0
NM_021828.4	-16.6785	-3.76265	0
NM_016338.4	-16.4694	-3.59985	1
NM_201269.2	-16.4464	4.55851	1
NM_003120.2	-16.4034	-2.11323	0
NM_001270616.1	-16.3618	6.78672	1
NM_012203.1	-16.2718	-3.32094	0
NM_001289121.1	-16.267	5.52676	0
NM_020864.1	-16.178	4.47143	0
NM_022062.2	-16.1014	8.92534	0
NM_002144.3	-16.0722	-4.98925	0
NM_001798.4	-16.013	-13.7754	1
NM_002228.3	-15.9511	-5.77574	0
NM_001282880.1	-15.9479	2.09335	0
NM_001083601.2	-15.9442	2.8704	1
NM_001193308.1	-15.8055	2.85188	0
NM_139167.3	-15.7779	5.30106	0
NM_181706.4	-15.7452	3.50248	0
NM_005011.4	-15.6247	4.52164	0
NM_033029.3	-15.5182	6.50439	0
NM_001287497.1	-15.4758	3.23374	0
NM_182932.2	-15.4045	-25.7516	1
NM_018967.4	-15.1953	-2.08852	1
NM_001271969.1	-15.1641	-4.19136	1
NM_017984.4	-15.1357	0.498761	0
NM_007159.4	-15.1251	-0.897047	1
NM_198445.3	-15.1058	1.68976	1
NM_001220488.1	-15.0537	9.54871	2
NM_021211.3	-15.0181	-2.28199	1
NM_023948.4	-14.9978	-1.89878	1
NM_002314.3	-14.872	-3.97256	0
NM_017906.2	-14.8241	-2.6327	2
NM_181877.3	-14.6788	2.93826	0
NM_005029.3	-14.6169	-6.01005	0
NM_001080470.1	-14.6032	1.38854	0
NM_138468.5	-14.5178	7.12606	0
NM_016612.3	-14.4888	-2.02219	0
NM_006898.4	-14.4015	10.7701	0
NM_003184.3	-14.384	2.10928	0
NM_001037317.1	-14.3338	1.03327	0
NM_207407.2	-14.3057	6.74224	0
NM_024852.3	-14.2978	-8.01393	0
NM_001321026.1	-14.2764	4.24362	0
NM_148978.2	-14.2668	4.12533	1
NM_153211.3	-14.2595	-27.8146	1
NM_001178055.1	-14.18	0.399783	0
NM_014743.2	-14.1638	-32.1419	1
NM_000681.3	-14.1304	0.101505	0
NM_178508.4	-13.989	-0.0691434	2
NM_133452.2	-13.9855	5.2307	0
NM_152455.3	-13.9366	1.99049	0
NM_001134375.1	-13.924	-31.4328	0
NM_177966.6	-13.922	-6.18571	0
NM_032221.4	-13.9163	1.05092	0
NM_001033561.1	-13.9157	-4.31097	0
NM_007350.3	-13.706	4.90374	2
NM_024669.2	-13.6759	-3.36906	0
NM_001129827.1	-13.673	-9.59042	1
NM_001087.4	-13.6219	-9.40793	1
NM_001166215.1	-13.5412	-0.36519	0
NM_016423.2	-13.4477	2.08979	0
NM_013376.3	-13.41	2.22013	0
NM_001144825.1	-13.4097	2.41821	0
NM_153026.2	-13.3649	-5.76103	0
NM_006166.3	-13.3536	-2.14442	0
NM_024787.3	-13.3526	-8.65303	0
NM_005730.3	-13.3487	1.87022	1
NM_025182.3	-13.2961	-0.498201	0
NM_032936.3	-13.2726	3.56991	0
NM_134268.4	-13.1803	-4.83851	0
NM_000325.5	-13.1236	-30.5603	0
NM_018127.6	-13.1132	-2.69441	0
NM_001012756.2	-13.0208	2.29369	0
NM_002544.4	-13.0187	-0.731104	0
NM_014839.4	-13.0153	-1.30271	2
NM_007313.2	-12.9927	1.55971	1
NM_006570.4	-12.9807	2.2134	0
NM_020655.3	-12.9539	5.22666	1
NM_020731.4	-12.9048	1.13939	0
NM_007249.4	-12.8702	-6.82834	0
NM_001080491.3	-12.8398	5.2204	1
NM_017693.3	-12.8235	-2.3738	1
NM_001112808.2	-12.8156	3.54148	0
NM_001242487.1	-12.8132	-5.39369	0
NM_014326.3	-12.7742	-0.459059	0
NM_001145161.2	-12.7284	-3.80405	0
NM_001039690.3	-12.7092	3.5083	2
NM_001290258.1	-12.6922	-2.53591	1
NM_014389.2	-12.6825	4.63438	0
NM_014738.5	-12.6692	-10.9256	0
NM_001729.3	-12.6689	-2.52363	1
NM_001080497.2	-12.6677	-1.46138	1
NM_032452.2	-12.6638	1.8578	1
NM_018217.2	-12.6108	-4.05741	1
NM_015153.3	-12.5399	-24.0091	1
NM_014715.3	-12.5293	7.56949	1
NM_001293289.1	-12.492	-2.60938	0
NM_145052.3	-12.4807	-6.77613	0
NM_016628.4	-12.405	1.89424	0
NM_015279.1	-12.3871	-5.22772	2
NM_024612.4	-12.3836	1.35508	2
NM_006162.4	-12.3431	0.302456	0
NM_173493.2	-12.3199	0.568757	0
NM_020834.2	-12.288	-3.3908	0
NM_198486.3	-12.2839	1.947	0
NM_015077.3	-12.2786	-1.10463	0
NM_182522.4	-12.2361	-1.44278	0
NM_058237.1	-12.2276	-3.79635	0
NM_031212.3	-12.1598	-3.47672	0
NM_004277.4	-12.1582	5.26589	2
NM_013365.4	-12.1411	-4.99257	0
NM_002649.3	-12.0728	-0.556986	0
NM_002518.3	-12.0677	-23.9948	1
NM_001202559.1	-12.0601	-2.97317	0
NM_007202.3	-12.0004	-3.0478	0
NM_015651.2	-11.9827	-18.1468	1
NM_138793.3	-11.9728	-3.88327	2
NM_020792.4	-11.9046	-0.904514	0
NM_003849.3	-11.8844	0.874208	0
NM_015985.3	-11.8369	1.67255	0
NM_001031812.3	-11.8332	-10.6888	1
NM_032737.3	-11.8329	0.954409	0
NM_001145073.2	-11.821	-0.253905	1
NM_016077.4	-11.7696	-6.1148	0
NM_004326.3	-11.7507	-5.93025	0
NM_014603.2	-11.683	-3.7253	0
NM_004316.3	-11.6775	-2.6927	0
NM_016535.3	-11.6705	-4.19381	0
NM_003462.3	-11.6675	1.07678	0
NM_005194.3	-11.6235	-2.03459	2
NM_173519.2	-11.5957	2.42792	0
NM_018275.4	-11.5864	-6.86323	0
NM_001242359.1	-11.5805	-10.9727	0
NM_015361.3	-11.5682	3.30824	0
NM_001286059.1	-11.5452	-1.17685	0
NM_003808.3	-11.5287	0.206336	0
NM_001198954.1	-11.4883	4.17198	0
NM_000723.4	-11.4478	-1.21192	0
NM_001134663.1	-11.4445	-8.13317	0
NM_005967.3	-11.3508	4.15138	0
NM_021029.5	-11.335	-3.99081	1
NM_198215.3	-11.3311	-17.3856	1
NM_001287757.1	-11.29	1.49581	1
NM_014757.4	-11.2845	-0.504904	0
NM_001485.3	-11.2649	-9.79798	0
NM_022659.3	-11.2019	-6.67139	0
NM_001004106.2	-11.1962	5.84798	2
NM_006192.4	-11.19	-8.47745	2
NM_053275.3	-11.1792	-36.8133	1
NM_001278720.1	-11.1253	-0.231311	1
NM_001286400.1	-11.1129	-3.65462	1
NM_203327.1	-11.108	1.50389	0
NM_005600.2	-11.089	3.39474	0
NM_014000.2	-11.0824	10.1036	0
NM_001112704.1	-11.0796	-4.86221	0
NM_178839.4	-11.048	-5.71068	0
NM_194250.1	-11.0432	-3.30592	1
NM_004097.2	-10.9613	3.72841	0
NM_003927.4	-10.9432	-2.481	0
NM_020919.3	-10.9408	-2.77508	1
NM_004100.4	-10.9389	-11.6959	1
NM_153708.2	-10.9316	-1.72503	0
NM_005308.2	-10.9116	-24.1907	2
NM_004273.4	-10.8979	-1.24607	0
NM_032042.5	-10.8889	4.36871	0
NM_000079.3	-10.8871	-0.918863	1
NM_024516.3	-10.8773	-5.20086	1
NM_001009924.1	-10.875	-6.81808	0
NM_004364.4	-10.869	-3.18519	0
NM_015138.4	-10.8636	-3.62625	0
NM_016044.2	-10.8516	-1.38809	0
NM_004152.3	-10.8511	-2.74498	0
NM_003161.3	-10.8133	9.45063	0
NM_005716.3	-10.743	-1.87793	1
NM_177964.4	-10.6991	2.20981	0
NM_032415.5	-10.6932	-3.74661	0
NM_020920.3	-10.6519	-0.185948	1
NM_004716.3	-10.637	-19.8915	1
NM_001085377.1	-10.6272	5.29618	0
NM_006219.2	-10.6179	-1.01283	0
NM_007358.3	-10.5985	-3.98974	1
NM_002711.3	-10.5628	1.48707	1
NM_000278.4	-10.5613	-0.53608	0
NM_019096.4	-10.5555	-1.15378	1
NM_020904.2	-10.551	-1.23133	1
NM_012262.3	-10.5307	-1.43441	0
NM_197960.3	-10.5277	-2.06762	0
NM_152243.2	-10.5078	-0.967797	0
NM_144633.2	-10.3935	-12.7014	0
NM_000284.3	-10.3906	4.54497	0
NM_007009.2	-10.3806	-11.3068	1
NM_152734.3	-10.3394	-3.00545	0
NM_006266.3	-10.3261	-7.77127	0
NM_152264.4	-10.3154	-7.87562	2
NM_001242336.1	-10.3108	0.555303	1
NM_153703.4	-10.3012	0.714216	0
NM_015163.5	-10.2958	-4.80345	0
NM_001256182.1	-10.2847	-9.32203	0
NM_021140.3	-10.248	-5.91975	1
NM_014023.3	-10.2391	7.658	0
NM_001080529.2	-10.2208	0.767214	1
NM_024646.2	-10.2068	-1.97313	0
NM_017819.3	-10.1851	0.104775	0
NM_144688.4	-10.1759	1.47685	0
NM_001306087.1	-10.1579	-10.9183	1
NM_007207.5	-10.1364	-35.5085	0
NM_024731.3	-10.1234	-1.07703	0
NM_144964.3	-10.119	1.74936	1
NM_138442.3	-10.0785	-18.701	1
NM_001323289.1	-10.0131	-3.81385	1
NM_020722.1	-10.0009	-1.72774	1
NM_023938.5	-9.99391	-3.6823	0
NM_001316331.1	-9.98502	-0.932534	0
NM_024551.2	-9.97657	-16.0382	1
NM_206827.1	-9.97138	-1.15855	0
NM_018150.3	-9.95666	-1.5704	0
NM_001134363.2	-9.95172	-0.683618	0
NM_001278.4	-9.94246	-3.99692	0
NM_018216.2	-9.9368	5.72253	0
NM_001109903.1	-9.92762	6.41093	0
NM_000946.2	-9.92445	1.79001	1
NM_183419.3	-9.90501	-3.20073	1
NM_030809.2	-9.88262	-27.2852	1
NM_005938.3	-9.86544	-5.06586	1
NM_153186.4	-9.86374	7.58301	0
NM_001080492.1	-9.85913	6.22943	1
NM_007148.4	-9.82745	-2.15734	0
NM_002229.2	-9.81633	-4.08089	0
NM_019073.3	-9.80644	-3.57384	2
NM_001018071.3	-9.79268	-1.6675	0
NM_001005463.2	-9.74282	3.38952	0
NM_001560.2	-9.7306	-5.51355	2
NM_017706.4	-9.72889	2.03518	1
NM_020193.4	-9.72877	-0.795322	1
NM_030753.4	-9.7237	-2.16883	0
NM_020921.3	-9.71885	-23.723	1
NM_003616.2	-9.70058	1.71308	0
NM_024089.2	-9.694	3.08884	2
NM_014618.2	-9.68877	-21.2012	2
NM_005924.4	-9.63791	-17.3249	1
NM_005583.4	-9.63589	3.10984	0
NM_020702.4	-9.62307	3.29676	0
NM_004235.5	-9.60756	4.24678	0
NM_181718.3	-9.59991	-0.377294	0
NM_014112.4	-9.59546	-13.0106	1
NM_001293171.2	-9.56576	-7.31686	0
NM_014907.2	-9.56514	-5.08399	0
NM_053276.3	-9.55258	2.95983	0
NM_001178007.1	-9.5491	4.02865	0
NM_006310.3	-9.54615	-4.14005	0
NM_005032.6	-9.54151	-17.9536	1
NM_130838.1	-9.49541	-2.33475	1
NM_021090.3	-9.48672	-23.7391	1
NM_001037277.1	-9.47305	6.23473	0
NM_001142733.2	-9.44475	-4.33493	1
NM_012449.2	-9.44387	-1.31451	0
NM_002520.6	-9.43465	-8.01937	0
NM_016252.3	-9.42444	4.3392	0
NM_005904.3	-9.42208	-6.3053	1
NM_004852.2	-9.4171	-6.85767	2
NM_001144877.2	-9.4143	-0.983766	0
NM_032968.4	-9.41061	-4.77738	2
NM_002316.3	-9.39411	3.41264	0
NM_014755.2	-9.38745	-11.2178	1
NM_001130849.1	-9.38371	9.51018	0
NM_004641.3	-9.36099	-7.40186	0
NM_000444.5	-9.35716	7.00576	2
NM_000161.2	-9.34459	1.10554	1
NM_001085461.1	-9.332	-1.15085	1
NM_001135721.1	-9.32203	-12.6138	0
NM_153331.3	-9.32098	-6.65464	1
NM_001103176.1	-9.31896	-11.2089	1
NM_020770.2	-9.28958	3.03744	0
NM_182488.3	-9.28934	1.88204	0
NM_198075.3	-9.28302	-6.42973	1
NM_198859.3	-9.27372	-8.55733	0
NM_001178085.1	-9.22827	-25.313	1
NM_004975.3	-9.17204	1.82123	0
NM_138423.3	-9.17009	-3.14459	2
NM_019105.6	-9.16143	-2.77629	0
NM_003179.2	-9.14949	-3.20502	0
NM_024909.3	-9.13782	-7.41253	1
NM_024046.4	-9.13463	2.34305	1
NM_173849.2	-9.12864	3.02059	0
NM_139045.3	-9.09602	-9.91757	0
NM_203301.3	-9.09536	1.31626	0
NM_001100396.1	-9.0903	0.166209	1
NM_024616.2	-9.04224	-2.83295	1
NM_001321039.1	-9.00751	-4.39955	0
NM_003453.4	-8.99787	7.0042	0
NM_001018006.1	-8.98678	8.67437	0
NM_003632.2	-8.9815	1.58144	0
NM_004664.3	-8.9725	2.70857	0
NM_000899.4	-8.9705	-0.780737	1
NM_012331.4	-8.96281	3.47797	0
NM_001322194.1	-8.9428	8.84613	0
NM_002115.2	-8.93874	-10.814	0
NM_182530.2	-8.93292	-16.9204	1
NM_001841.2	-8.90551	-1.72055	2
NM_005827.2	-8.90507	-3.35859	1
NM_001080515.2	-8.90014	-3.39781	0
NM_004527.3	-8.89785	-21.5695	0
NM_001305163.1	-8.88281	1.54313	0
NM_003955.4	-8.87326	-5.79017	0
NM_003593.2	-8.85197	1.2856	0
NM_152545.2	-8.85113	8.83722	0
NM_001291291.1	-8.84446	1.62919	0
NM_001136196.1	-8.81227	-1.19744	1
NM_003656.4	-8.79828	2.25681	1
NM_002199.3	-8.78529	-10.5477	0
NM_033334.3	-8.7791	1.02057	1
NM_003702.4	-8.77841	0.235095	0
NM_001025300.2	-8.76794	-3.50606	0
NM_001048221.2	-8.76542	-12.7196	0
NM_006702.4	-8.74034	-2.5725	0
NM_031297.4	-8.73628	0.303754	0
NM_001013732.3	-8.72851	-0.925787	0
NM_019617.3	-8.7275	1.41025	0
NM_001010892.2	-8.71735	1.25782	2
NM_198398.1	-8.71479	-14.9169	1
NM_000695.3	-8.70544	-1.25739	1
NM_004378.2	-8.67939	-1.52777	0
NM_001300.5	-8.67669	-0.575959	0
NM_004479.3	-8.67057	0.57312	1
NM_001126111.2	-8.66908	-6.22528	0
NM_001077268.1	-8.6607	-2.02656	0
NM_020761.2	-8.65974	0.300453	0
NM_001011709.2	-8.64771	-1.71184	1
NM_017972.3	-8.6352	-27.6166	1
NM_004905.2	-8.63414	2.34424	2
NM_001319296.1	-8.63307	3.14301	0
NM_001135218.1	-8.63181	4.88716	0
NM_174905.3	-8.61926	-2.62336	1
NM_005060.3	-8.61626	-8.77079	2
NM_019854.4	-8.59965	-1.94913	0
NM_014962.3	-8.59338	-19.7917	1
NM_014479.3	-8.58478	-2.17222	0
NM_018181.5	-8.57828	6.48528	0
NM_138333.4	-8.57415	3.22652	1
NM_022470.3	-8.5577	-10.3238	0
NM_198570.4	-8.54365	6.03534	0
NM_173485.5	-8.5421	1.61725	1
NM_019087.2	-8.53812	-16.5332	0
NM_014682.2	-8.53697	-22.2041	1
NM_003411.3	-8.52691	-23.3371	1
NM_001013635.3	-8.51742	3.85623	0
NM_007109.2	-8.51408	-1.3725	1
NM_006361.5	-8.48397	-4.99715	1
NM_002839.3	-8.47998	-10.3365	1
NM_001004434.2	-8.46306	-4.11226	1
NM_002479.5	-8.45464	-16.614	1
NM_006006.4	-8.45313	2.24239	0
NM_014188.2	-8.45106	-5.15476	0
NM_001310156.1	-8.44462	-0.737733	0
NM_175062.3	-8.43871	-1.55124	0
NM_001070.4	-8.43787	0.78844	1
NM_001031855.2	-8.4244	-3.29609	0
NM_001289999.1	-8.42115	7.72249	0
NM_012139.3	-8.40908	2.39552	1
NM_014814.2	-8.39114	1.9501	0
NM_002141.4	-8.38876	1.15799	0
NM_005123.3	-8.3854	1.44075	0
NM_178152.2	-8.38344	0.551824	0
NM_014720.3	-8.3758	-29.3552	0
NM_003923.2	-8.37407	-0.971202	1
NM_017649.4	-8.369	0.275818	0
NM_152751.2	-8.36522	-2.77791	0
NM_030817.2	-8.35872	-1.46762	0
NM_001080475.2	-8.34306	-30.2937	1
NM_177403.5	-8.33507	1.10421	1
NM_016437.2	-8.31917	0.187662	1
NM_178547.3	-8.31661	3.41906	0
NM_001939.2	-8.31238	-16.0903	0
NM_001258038.1	-8.30218	5.46551	1
NM_176816.4	-8.29898	2.41067	1
NM_001007467.2	-8.29496	-2.17294	0
NM_001204848.1	-8.28839	-4.79693	1
NM_015550.3	-8.28548	0.897322	0
NM_033117.3	-8.27254	2.76441	1
NM_015466.3	-8.26929	-18.1266	0
NM_207317.2	-8.26024	-4.23534	2
NM_032738.3	-8.24731	0.384539	0
NM_144988.3	-8.24458	0.805888	2
NM_022785.3	-8.24	2.44824	0
NM_014268.3	-8.23939	5.98106	1
NM_152609.2	-8.23888	-26.59	1
NM_152349.2	-8.23673	-4.64016	1
NM_007026.3	-8.23021	2.61989	0
NM_001169109.1	-8.22963	-0.804788	0
NM_001031737.2	-8.22529	2.35026	1
NM_173587.3	-8.22476	-5.97142	0
NM_001127208.2	-8.21765	5.35231	1
NM_005169.3	-8.21571	-4.09752	0
NM_005870.4	-8.2016	6.32529	0
NM_032271.2	-8.18447	-1.3939	0
NM_001005404.3	-8.18357	4.443	0
NM_032552.3	-8.17166	-6.36062	0
NM_004830.3	-8.17086	-2.09433	0
NM_001083909.2	-8.15616	2.38088	0
NM_006218.3	-8.14628	-26.2518	0
NM_000870.6	-8.14436	-18.4552	1
NM_001098208.1	-8.13813	4.31468	0
NM_001244949.1	-8.13148	-21.6702	1
NM_001317781.1	-8.12957	-6.51163	1
NM_145053.4	-8.12748	-7.98569	1
NM_024031.3	-8.12715	4.30835	2
NM_032127.3	-8.12247	-0.227312	0
NM_031488.4	-8.10766	-6.10762	0
NM_031891.3	-8.10762	-3.94663	0
NM_133171.4	-8.10305	2.34289	1
NM_001278393.1	-8.09625	-2.4579	0
NM_054025.2	-8.08999	-0.974859	1
NM_007186.5	-8.07596	-1.51924	0
NM_052943.3	-8.07595	-5.15262	0
NM_023034.1	-8.05404	-31.7805	0
NM_001001660.2	-8.05264	7.66202	0
NM_001759.3	-8.03986	-21.9196	0
NM_015094.2	-8.02675	1.22696	0
NM_001256091.1	-8.02653	-0.642507	1
NM_012290.4	-8.0063	-3.09097	0
NM_022567.2	-8.00381	-0.761625	0
NM_001272004.1	-7.96635	-10.9039	0
NM_001177317.1	-7.95241	1.74758	1
NM_025052.4	-7.94444	-18.8663	0
NM_139248.2	-7.93279	-3.35982	2
NM_001031685.2	-7.92274	3.69791	0
NM_012285.2	-7.90858	-4.2601	0
NM_153228.2	-7.90769	-3.77537	2
NM_153230.2	-7.90723	-3.01078	0
NM_018489.2	-7.90275	-0.99505	0
NM_024874.4	-7.90141	-9.50607	1
NM_001009881.2	-7.88521	1.70065	1
NM_007067.4	-7.86845	4.46544	1
NM_031282.2	-7.86797	-5.20635	2
NM_001184766.1	-7.84784	-2.49412	1
NM_145733.2	-7.84315	-3.52211	0
NM_130902.2	-7.84114	5.39904	0
NM_017431.2	-7.83466	-1.25594	0
NM_152263.3	-7.83416	-0.960804	0
NM_005735.3	-7.83328	0.730656	1
NM_032420.3	-7.81989	0.525574	0
NM_012199.4	-7.81732	-16.182	0
NM_019555.2	-7.81731	-4.07078	1
NM_022497.4	-7.81135	-6.95007	0
NM_017763.5	-7.81129	2.22034	0
NM_005278.4	-7.80122	-4.97196	0
NM_005822.3	-7.78489	-9.27345	0
NM_001946.3	-7.78384	10.8462	0
NM_006133.2	-7.78208	0.950503	1
NM_020772.2	-7.78108	-3.48261	1
NM_004799.3	-7.78056	-23.6726	1
NM_004061.4	-7.77978	-26.676	1
NM_006844.4	-7.77828	-2.05656	1
NM_017590.5	-7.77649	-5.13092	1
NM_033238.2	-7.7538	-3.15902	0
NM_000494.3	-7.75229	-11.0109	1
NM_004709.2	-7.74386	-3.16567	1
NM_000535.6	-7.7237	-22.2451	1
NM_024326.3	-7.71158	-4.09252	0
NM_014891.6	-7.6981	1.97787	1
NM_005425.4	-7.69115	1.04167	0
NM_005806.3	-7.68494	-3.90426	1
NM_012309.4	-7.68306	8.52232	0
NM_144580.2	-7.66636	2.10621	1
NM_014819.4	-7.66566	-3.05794	0
NM_182606.3	-7.66284	2.16716	0
NM_012419.4	-7.65668	0.797846	1
NM_006041.2	-7.65422	0.200208	1
NM_020861.2	-7.65167	-4.28204	1
NM_020809.3	-7.64658	-2.53023	0
NM_024045.1	-7.64592	-0.826732	0
NM_001161344.1	-7.64441	-28.5834	1
NM_014741.4	-7.63714	-3.8994	1
NM_144772.2	-7.63592	5.33456	0
NM_145026.3	-7.63304	-2.76554	0
NM_001823.4	-7.62211	1.36778	0
NM_145914.2	-7.61653	1.44955	0
NM_152440.4	-7.61129	-1.41707	1
NM_001199148.1	-7.60833	-6.93138	1
NM_014598.3	-7.5989	1.42017	1
NM_133639.3	-7.59042	1.58976	1
NM_001009880.1	-7.58454	0.855801	1
NM_014963.2	-7.5817	-6.48697	0
NM_005522.4	-7.57225	3.76574	1
NM_006768.4	-7.55705	-3.3307	0
NM_133265.2	-7.54745	-14.6386	0
NM_138361.5	-7.52969	-2.33312	0
NM_001293228.1	-7.52463	-2.42882	0
NM_001973.3	-7.52405	-7.51474	0
NM_012243.2	-7.51405	-0.209855	0
NM_002446.3	-7.5084	-4.90856	0
NM_002431.3	-7.50622	-15.9013	0
NM_002505.4	-7.50563	-19.4486	0
NM_004606.4	-7.50443	-0.0059589	0
NM_001079675.2	-7.49964	-0.582679	0
NM_144604.3	-7.49858	-22.6059	1
NM_175883.2	-7.49256	-4.36521	0
NM_001039380.3	-7.49246	1.35504	2
NM_001297778.1	-7.49228	8.77213	0
NM_024523.5	-7.48942	-4.77154	0
NM_138467.2	-7.47608	-3.38075	2
NM_018946.3	-7.47319	-18.6721	0
NM_207377.2	-7.46085	-0.0163096	0
NM_001304507.1	-7.44899	8.2663	0
NM_003585.4	-7.44394	2.27945	0
NM_001256155.2	-7.439	1.17534	1
NM_001040283.2	-7.43627	-3.68605	0
NM_030567.4	-7.43195	-2.1319	0
NM_016507.3	-7.43059	4.41264	1
NM_005359.5	-7.42839	1.85971	0
NM_001018024.2	-7.42718	6.64077	2
NM_021135.5	-7.42633	-0.333152	0
NM_005295.2	-7.42526	11.3799	0
NM_005010.4	-7.41507	-6.64606	0
NM_024575.4	-7.41073	8.08147	0
NM_005275.3	-7.40212	2.98437	1
NM_012459.2	-7.40198	3.07556	0
NM_001278284.1	-7.40115	-4.59766	1
NM_033157.3	-7.39947	-23.9711	1
NM_152565.1	-7.39725	4.05445	1
NM_001288794.1	-7.3964	-3.9755	0
NM_001267595.1	-7.396	-21.6977	1
NM_013449.3	-7.38804	-1.53994	0
NM_006201.4	-7.3872	-14.0864	0
NM_145798.2	-7.38527	-2.92789	0
NM_080669.5	-7.38479	4.00784	1
NM_001289824.1	-7.38154	1.70359	2
NM_006999.4	-7.37767	-1.22099	0
NM_006474.4	-7.37374	-2.31644	0
NM_024344.1	-7.37231	-1.44054	2
NM_007040.5	-7.36578	-13.5035	1
NM_001025091.1	-7.36495	-2.34967	1
NM_020754.3	-7.36371	2.79614	1
NM_031281.2	-7.35864	-5.74284	2
NM_016183.3	-7.35833	-1.35983	2
NM_004844.4	-7.35398	-2.47082	0
NM_197941.3	-7.35126	9.58453	0
NM_020939.1	-7.33851	7.40162	0
NM_007219.4	-7.33593	-2.64127	0
NM_001242729.1	-7.32617	-1.30822	0
NM_001776.5	-7.32429	2.89402	1
NM_001129994.1	-7.31978	-4.57481	0
NM_020814.2	-7.31521	-9.74577	0
NM_000871.2	-7.3132	-9.1345	0
NM_001018077.1	-7.31194	-2.09997	1
NM_032728.3	-7.30937	-26.6343	0
NM_004756.4	-7.29754	-0.0287465	0
NM_173157.2	-7.29127	1.11932	1
NM_017953.3	-7.28754	0.0578568	1
NM_001253676.1	-7.28675	-35.7438	1
NM_053006.4	-7.27686	-5.34642	1
NM_015473.3	-7.27121	-19.5949	1
NM_014169.3	-7.2702	-2.08845	0
NM_001145661.1	-7.26891	-4.64672	0
NM_005873.2	-7.26617	-9.1796	1
NM_006896.3	-7.26372	-5.83509	1
NM_144593.2	-7.24225	-4.02913	1
NM_004295.3	-7.22258	-7.74479	0
NM_006289.3	-7.21359	-0.341021	1
NM_001130448.2	-7.20454	1.43256	1
NM_001002762.2	-7.18262	-4.00896	0
NM_001199659.2	-7.18182	-0.790601	1
NM_020899.3	-7.17173	-12.8668	1
NM_015162.4	-7.17043	-1.9128	0
NM_002653.4	-7.16634	-3.41804	0
NM_000840.2	-7.16067	8.15049	0
NM_001130475.2	-7.15462	-6.9953	1
NM_001001479.3	-7.15443	1.24957	1
NM_001001974.2	-7.1521	-8.40894	1
NM_152550.3	-7.15056	-32.8024	1
NM_001253.3	-7.14801	-0.723445	0
NM_001193425.1	-7.14319	-1.22	2
NM_016541.2	-7.13893	-1.01145	0
NM_003289.3	-7.13812	9.00852	0
NM_199040.3	-7.13479	2.23056	0
NM_003038.4	-7.13424	1.02333	0
NM_172071.3	-7.13418	-3.40592	2
NM_032279.3	-7.13132	-4.72602	1
NM_001178015.1	-7.12984	-2.42328	0
NM_020130.4	-7.11235	-0.55326	0
NM_001145524.1	-7.10105	-23.971	1
NM_006996.2	-7.09992	-11.6807	1
NM_004752.3	-7.09901	-2.7769	0
NM_001012664.2	-7.09784	-2.29601	0
NM_003133.5	-7.09617	-6.0394	0
NM_173872.3	-7.09334	-4.58335	1
NM_152572.2	-7.09159	-5.4846	0
NM_005732.3	-7.08731	-6.55231	0
NM_033644.2	-7.08645	-6.10919	0
NM_001717.3	-7.08527	2.60116	0
NM_022755.5	-7.08223	-2.71377	0
NM_198040.2	-7.07641	-2.20278	1
NM_207363.2	-7.07294	-15.0062	0
NM_018222.4	-7.06358	2.08717	0
NM_006048.4	-7.06219	-5.44379	1
NM_153219.3	-7.05004	-8.91097	1
NM_019113.3	-7.04591	-1.01441	1
NM_174931.3	-7.04223	-4.90552	0
NM_014901.4	-7.04143	1.47069	2
NM_001177479.1	-7.04075	-0.775436	1
NM_005208.4	-7.0402	5.37712	0
NM_024721.4	-7.03292	8.5514	1
NM_020528.2	-7.03272	-3.15183	0
NM_001286554.1	-7.03112	-6.2889	2
NM_014643.3	-7.02486	-4.11641	0
NM_015075.1	-7.02104	-5.53227	0
NM_031916.4	-7.01822	2.74503	0
NM_198123.1	-7.01415	-1.65497	2
NM_001885.2	-7.01232	-5.421	0
NM_001012959.1	-7.00957	-6.37618	0
NM_130783.4	-7.00865	-26.4565	0
NM_001318856.1	-7.00353	6.48094	0
NM_024798.2	-6.99828	-7.03154	0
NM_017969.2	-6.99473	-7.2559	1
NM_020651.3	-6.9892	-5.73691	1
NM_017757.2	-6.98362	-1.98304	0
NM_005257.5	-6.97913	2.87037	0
NM_182847.2	-6.97455	-9.45472	0
NM_005834.4	-6.9727	0.418772	2
NM_001009899.3	-6.96905	3.03192	0
NM_001349.3	-6.95762	-1.384	0
NM_020890.2	-6.95756	-29.8349	2
NM_001005566.2	-6.94609	-1.79082	0
NM_001012993.2	-6.94361	0.470235	0
NM_001412.3	-6.94147	-4.13457	1
NM_014637.3	-6.93591	-0.946839	0
NM_031989.4	-6.93465	-3.38952	1
NM_138959.2	-6.93225	-3.4037	1
NM_015188.1	-6.93188	-2.37164	1
NM_017779.5	-6.92939	-3.51623	1
NM_004397.5	-6.91091	0.801679	0
NM_020214.3	-6.90799	-1.82621	1
NM_152704.3	-6.90227	-3.46127	0
NM_024578.2	-6.898	-4.11785	0
NM_001480.3	-6.89613	-10.4508	0
NM_001101802.1	-6.89307	0.299503	0
NM_152688.3	-6.888	3.46605	0
NM_031449.3	-6.87862	-9.904	0
NM_016147.2	-6.86623	1.00134	0
NM_144587.3	-6.86042	3.1534	0
NM_025004.2	-6.85602	5.3019	0
NM_007332.2	-6.85272	2.17897	0
NM_005625.3	-6.84837	-1.56944	1
NM_145265.2	-6.84528	-6.55809	1
NM_020737.2	-6.8439	7.59789	0
NM_024622.5	-6.83689	1.23534	0
NM_138932.2	-6.83461	-5.78215	1
NM_000682.6	-6.83032	5.65721	0
NM_177400.2	-6.82835	4.4194	0
NM_020335.2	-6.82375	-0.86086	1
NM_005676.4	-6.81591	-3.73312	1
NM_032852.3	-6.81075	-2.65958	1
NM_000248.3	-6.80865	2.69628	0
NM_003162.3	-6.79956	6.0585	0
NM_144718.3	-6.79706	1.55614	2
NM_006480.4	-6.7956	-17.2036	0
NM_057168.1	-6.78792	-16.4232	0
NM_001199620.1	-6.7843	5.05453	1
NM_014048.4	-6.77835	0.785358	1
NM_173487.2	-6.7765	-5.07665	1
NM_012456.2	-6.76668	2.98796	0
NM_173075.4	-6.74907	-7.36432	0
NM_001114734.1	-6.74869	-0.135427	0
NM_015373.3	-6.74854	2.53274	0
NM_006734.3	-6.73494	-18.3842	2
NM_173852.3	-6.7341	-2.79054	0
NM_000912.4	-6.73281	3.73306	0
NM_005007.3	-6.73235	0.198979	0
NM_018113.3	-6.73193	-31.824	1
NM_003967.2	-6.72816	-8.6152	1
NM_014562.3	-6.70907	1.45286	0
NM_014686.3	-6.707	-5.04566	0
NM_001256864.1	-6.70664	-2.33049	1
NM_134261.2	-6.70238	-13.9255	2
NM_022073.3	-6.70136	1.00716	0
NM_001130677.1	-6.69541	0.0713009	1
NM_021965.3	-6.69531	-3.86811	0
NM_005389.2	-6.69145	3.41551	0
NM_000813.2	-6.69012	-0.0507084	1
NM_001193460.1	-6.68674	-2.82185	1
NM_021623.1	-6.67422	-6.44823	1
NM_014702.4	-6.67416	-6.57157	0
NM_001100624.2	-6.6691	-23.4266	1
NM_015721.2	-6.66635	2.05919	0
NM_020064.3	-6.6663	6.04741	1
NM_001796.4	-6.65402	3.94468	0
NM_006858.3	-6.62851	4.28776	0
NM_145008.2	-6.60298	-0.78056	1
NM_003069.4	-6.60238	-10.2112	1
NM_005236.2	-6.60109	4.92873	0
NM_024294.3	-6.59127	-5.66018	0
NM_173509.2	-6.58275	-6.1401	1
NM_004969.3	-6.58129	1.25642	0
NM_080748.2	-6.57947	1.6891	0
NM_004088.3	-6.57908	2.06184	0
NM_000990.4	-6.57408	-0.728022	1
NM_014713.4	-6.57141	-2.54582	0
NM_006392.3	-6.56637	-2.57068	1
NM_019102.3	-6.56329	13.3656	1
NM_014983.2	-6.5624	-19.8422	1
NM_004873.3	-6.56226	4.34755	0
NM_016606.3	-6.55789	-2.15287	1
NM_003847.2	-6.55603	0.986988	2
NM_017658.4	-6.5558	-12.4945	0
NM_004424.4	-6.55296	1.70722	0
NM_007208.3	-6.54412	1.22214	1
NM_033257.3	-6.54032	-6.24443	0
NM_002233.3	-6.53564	-3.15296	0
NM_024331.4	-6.53327	-1.77128	1
NM_020996.2	-6.52955	2.35924	0
NM_014296.2	-6.52078	-25.3783	1
NM_018242.2	-6.51567	-11.6563	0
NM_005074.3	-6.51395	-1.38979	0
NM_001038628.1	-6.51296	-0.747499	0
NM_001321389.1	-6.51153	6.4202	1
NM_018006.4	-6.51014	-15.6077	0
NM_012316.4	-6.50867	4.85305	0
NM_004133.4	-6.50373	10.9646	0
NM_017578.3	-6.50295	5.83175	2
NM_007086.3	-6.50129	-8.52801	0
NM_018266.2	-6.4998	-2.67316	1
NM_001242820.1	-6.4989	-2.86311	1
NM_002478.4	-6.49692	-11.4254	1
NM_002017.4	-6.49552	1.26069	0
NM_152486.2	-6.48889	-0.199565	1
NM_015048.1	-6.47805	-16.4413	0
NM_001145108.1	-6.47292	5.09639	1
NM_203349.3	-6.47197	-20.4163	1
NM_016260.2	-6.46087	-4.70755	1
NM_032192.3	-6.45724	1.85133	0
NM_144605.4	-6.45555	0.395253	0
NM_003670.2	-6.4555	-3.7259	0
NM_015475.4	-6.44867	-5.34066	0
NM_020869.3	-6.44637	-9.00072	1
NM_001110219.2	-6.44588	-0.575323	0
NM_176875.3	-6.44093	-6.47489	0
NM_002051.2	-6.43742	-14.5793	0
NM_001270524.1	-6.43528	1.36206	0
NM_013314.3	-6.43505	-4.15768	0
NM_080675.3	-6.42642	-0.540223	1
NM_015399.3	-6.42541	-3.36391	0
NM_021214.1	-6.42416	1.92097	0
NM_003223.2	-6.40979	-36.0975	0
NM_145808.3	-6.40355	-15.6685	0
NM_002448.3	-6.4025	-0.710677	0
NM_004907.2	-6.39658	5.24439	0
NM_000976.3	-6.38727	-2.34808	1
NM_030756.4	-6.3783	3.37496	1
NM_005500.2	-6.37463	4.8702	1
NM_006161.2	-6.36955	-12.1634	0
NM_005515.3	-6.36829	-0.176951	0
NM_003607.3	-6.36744	3.91252	1
NM_001201552.1	-6.36403	-0.315486	0
NM_031939.3	-6.36155	-0.848835	0
NM_001304364.1	-6.34729	-7.63058	1
NM_025187.4	-6.34541	5.77139	2
NM_016156.5	-6.34372	-2.7138	0
NM_198999.2	-6.34224	2.22058	1
NM_152531.4	-6.34184	-2.95169	2
NM_025092.4	-6.33194	3.76468	1
NM_021109.3	-6.33177	4.88366	0
NM_052854.3	-6.32884	0.103103	1
NM_002460.3	-6.32731	-4.28106	0
NM_147189.2	-6.32178	-9.32373	0
NM_152281.2	-6.32178	1.07751	0
NM_002377.2	-6.32018	-17.1155	1
NM_015523.3	-6.32006	4.29111	0
NM_018206.5	-6.31036	0.219794	1
NM_018471.2	-6.30561	0.807343	1
NM_015221.3	-6.30347	-35.3282	1
NM_001077653.2	-6.30298	-1.8479	0
NM_178150.2	-6.30189	-2.65769	2
NM_001143957.2	-6.30097	-34.6727	1
NM_001143835.1	-6.29715	-9.5733	0
NM_012342.2	-6.2961	2.80988	0
NM_001321194.1	-6.29489	-7.42307	1
NM_173615.4	-6.29267	3.98599	0
NM_017666.4	-6.29258	-7.03954	1
NM_001300804.1	-6.28633	-10.9476	1
NM_001381.4	-6.27982	-4.20437	0
NM_138387.3	-6.27875	-12.5389	1
NM_153265.2	-6.27838	-2.35878	0
NM_133465.3	-6.27462	3.35814	1
NM_020956.2	-6.27327	-3.4655	2
NM_015690.4	-6.27074	0.037671	0
NM_006095.2	-6.26773	-1.09441	0
NM_004454.2	-6.2661	-29.2045	1
NM_020133.2	-6.26	-1.99347	0
NM_032206.4	-6.24669	6.55674	2
NM_032869.3	-6.24478	1.3219	1
NM_001017922.1	-6.23442	3.69885	0
NM_025203.2	-6.23413	-10.0657	1
NM_178449.3	-6.23365	-11.3719	0
NM_006399.3	-6.21843	-9.24525	1
NM_145170.3	-6.21238	-0.933988	1
NM_018843.3	-6.2058	-4.18218	0
NM_001100166.1	-6.20482	1.03624	1
NM_016269.4	-6.2001	2.03904	0
NM_015210.3	-6.19992	-3.38732	0
NM_004667.5	-6.197	-1.57709	2
NM_017988.5	-6.1946	-24.9302	0
NM_022818.4	-6.19091	-0.85007	1
NM_001789.2	-6.17349	-3.8042	0
NM_032630.2	-6.17344	1.94255	1
NM_005568.4	-6.16231	-21.8008	2
NM_014701.3	-6.16066	0.201701	1
NM_021215.3	-6.15602	-11.9128	1
NM_019117.4	-6.15142	-17.0557	1
NM_001014795.2	-6.14914	9.55301	1
NM_004503.3	-6.14634	-15.3981	1
NM_002265.5	-6.13467	-17.0735	1
NM_001166345.1	-6.13462	-3.03934	2
NM_014903.5	-6.13213	-13.5881	0
NM_002049.3	-6.13133	-11.9406	1
NM_016848.5	-6.13132	2.27974	1
NM_181311.3	-6.12833	3.34646	0
NM_133264.4	-6.12823	-3.68438	1
NM_020208.3	-6.12758	-0.127384	0
NM_002234.3	-6.12402	0.569984	0
NM_017638.2	-6.12243	2.57246	0
NM_032293.4	-6.1132	2.51324	2
NM_004954.4	-6.11079	4.01445	0
NM_031262.3	-6.11042	-10.0103	1
NM_033375.4	-6.1094	-19.1346	0
NM_015401.4	-6.10756	-0.107275	1
NM_001145652.1	-6.10344	-6.27163	1
NM_005899.4	-6.10304	-2.35346	1
NM_018369.2	-6.09764	-2.55003	1
NM_032199.2	-6.09724	5.23793	2
NM_005973.4	-6.09179	-2.08658	1
NM_001039152.3	-6.09152	2.87384	2
NM_020226.3	-6.09127	-4.32788	1
NM_012241.4	-6.0905	7.22773	0
NM_175737.3	-6.08346	-5.87025	1
NM_001135050.1	-6.07265	-9.85319	1
NM_152490.4	-6.07256	2.68007	1
NM_006826.3	-6.06673	4.61721	0
NM_001281293.1	-6.04993	-3.16192	0
NM_002811.4	-6.04904	5.05339	2
NM_001256185.1	-6.04584	-4.55388	1
NM_001989.4	-6.04323	-4.3706	0
NM_001130518.1	-6.04121	0.546779	0
NM_005550.3	-6.04091	6.98812	0
NM_004766.2	-6.0404	-4.46901	2
NM_005754.2	-6.0313	-8.3776	0
NM_017822.3	-6.0299	-9.2401	2
NM_001079827.2	-6.02692	-16.3129	2
NM_002351.4	-6.02476	4.88478	1
NM_006885.3	-6.02458	6.19926	1
NM_004599.3	-6.01862	-4.24194	0
NM_006097.4	-6.0121	-2.69964	1
NM_020442.5	-6.00973	-7.27978	1
NM_002766.2	-6.00721	-0.78627	0
NM_001044370.1	-6.00663	-2.11423	1
NM_133494.2	-6.00516	-27.9617	1
NM_052841.3	-6.00501	4.55106	1
NM_001290117.1	-6.00395	-8.12141	0
NM_001172743.1	-6.00382	-13.2393	0
NM_183421.1	-6.00086	-17.7757	2
NM_153607.2	-6.00083	-4.34549	0
NM_130810.3	-5.98999	-14.4632	1
NM_201591.2	-5.98784	-5.95908	0
NM_014790.4	-5.98543	-6.88454	1
NM_001114107.4	-5.98375	-1.57188	1
NM_003106.3	-5.98094	0.197898	0
NM_001308313.1	-5.97827	5.27473	2
NM_017657.4	-5.97815	-6.54222	0
NM_145160.2	-5.97667	-8.02143	0
NM_003584.2	-5.96978	-2.20337	0
NM_004502.3	-5.96965	-6.91007	1
NM_003762.4	-5.96646	-3.52424	1
NM_019059.3	-5.96643	-10.3436	0
NM_001008391.3	-5.96566	-15.386	0
NM_020365.4	-5.9631	4.7104	0
NM_001039395.3	-5.95944	0.581633	1
NM_004274.4	-5.95024	-0.634483	0
NM_001243926.1	-5.94597	-9.34644	1
NM_005096.3	-5.93969	-5.52636	0
NM_000343.3	-5.93879	0.00790378	1
NM_001291825.1	-5.93818	0.306784	1
NM_002269.2	-5.93593	-16.5091	1
NM_001199954.1	-5.93395	4.20171	1
NM_006058.4	-5.93341	5.41739	0
NM_016115.4	-5.92995	1.42234	1
NM_001261425.1	-5.92271	-8.99994	1
NM_181871.3	-5.91734	4.20677	0
NM_015975.4	-5.90419	5.35802	0
NM_022725.3	-5.89871	-2.10786	1
NM_014051.3	-5.89744	-4.90936	1
NM_001039960.2	-5.89519	-0.784737	1
NM_001115.2	-5.89166	-3.02664	1
NM_012247.4	-5.89108	0.0398907	1
NM_004574.4	-5.88952	3.93645	2
NM_016391.7	-5.88537	-0.407839	1
NM_006246.3	-5.86713	-17.1476	0
NM_001011878.2	-5.86554	0.769339	0
NM_030789.3	-5.86519	2.8417	0
NM_198241.2	-5.86464	2.75371	0
NM_006063.2	-5.86343	1.81855	1
NM_001134415.1	-5.86138	-4.7169	1
NM_058246.3	-5.85731	-2.41355	1
NM_001990.3	-5.85383	9.51626	0
NM_017644.3	-5.85331	-3.35048	0
NM_005491.4	-5.85236	-15.2884	1
NM_153256.3	-5.8521	-3.97142	0
NM_020177.2	-5.85056	6.25386	1
NM_001271893.3	-5.8501	5.41123	1
NM_001113402.1	-5.84482	-7.48798	2
NM_181337.3	-5.83746	-6.79302	1
NM_014972.2	-5.83625	1.10841	1
NM_004638.3	-5.83275	-4.0894	1
NM_018948.3	-5.83132	6.47787	1
NM_153015.2	-5.82095	-3.49378	1
NM_145071.2	-5.82007	3.37243	0
NM_006397.2	-5.81315	-8.98835	1
NM_017714.2	-5.81148	-2.39209	0
NM_022373.4	-5.8089	-4.97444	0
NM_001317056.1	-5.80771	0.314322	0
NM_020798.2	-5.80544	-8.80664	0
NM_006327.3	-5.80527	-7.56218	0
NM_002703.4	-5.80218	0.255458	2
NM_000073.2	-5.80044	-14.6018	1
NM_000352.4	-5.79309	-7.10161	2
NM_015559.2	-5.78625	-16.3869	0
NM_004845.4	-5.78308	-10.1255	1
NM_006819.2	-5.78253	-8.61496	1
NM_004211.4	-5.76921	-3.12068	0
NM_021239.2	-5.76858	-3.77998	0
NM_012214.2	-5.76847	-5.60616	1
NM_001961.3	-5.76519	-0.508267	0
NM_005201.3	-5.76229	-0.812015	1
NM_032574.3	-5.7596	-5.42697	0
NM_002758.3	-5.75908	-4.9202	1
NM_003846.2	-5.75188	-0.6139	1
NM_015184.5	-5.74545	-21.5223	0
NM_024701.3	-5.74507	-14.3359	1
NM_000941.2	-5.74326	0.378056	0
NM_016019.4	-5.74156	-4.63018	0
NM_005156.6	-5.7414	-15.2019	1
NM_014328.4	-5.73404	-3.41475	1
NM_002126.4	-5.73197	-0.766594	0
NM_032119.3	-5.72471	-7.65384	0
NM_006520.2	-5.72078	-10.8016	1
NM_030905.2	-5.71601	0.262912	0
NM_022080.2	-5.71332	-1.00125	0
NM_001024822.2	-5.71252	-4.1534	0
NM_013400.3	-5.71108	2.85909	0
NM_003975.3	-5.70789	-2.93894	2
NM_145251.3	-5.70397	-9.15268	0
NM_005424.4	-5.6971	-6.11222	1
NM_016010.2	-5.69585	-3.13239	1
NM_001079521.1	-5.69581	-29.5598	1
NM_033426.2	-5.69473	0.20573	0
NM_001322208.1	-5.69232	-6.00082	0
NM_001005270.4	-5.69198	-2.3721	1
NM_198426.2	-5.69103	-3.96526	0
NM_198968.3	-5.68118	-2.2814	0
NM_001199297.2	-5.6804	1.48605	1
NM_001199241.1	-5.67911	-5.55291	2
NM_001267843.1	-5.67902	-2.92334	0
NM_006244.3	-5.67434	-2.65243	1
NM_003696.2	-5.67	-9.82976	1
NM_005490.2	-5.66575	-3.1282	1
NM_004287.4	-5.66537	-3.29442	0
NM_006186.3	-5.66372	7.8231	1
NM_001170880.1	-5.65882	-17.9756	1
NM_016932.4	-5.64921	-17.3504	0
NM_032246.4	-5.64202	-8.59839	1
NM_004189.3	-5.63439	-9.4983	0
NM_005843.5	-5.63359	-1.99234	1
NM_198493.2	-5.63259	0.538575	1
NM_005675.4	-5.63225	-5.59837	0
NM_144697.3	-5.63104	-0.929578	1
NM_001824.4	-5.63092	3.05852	0
NM_014690.4	-5.62662	-14.2654	0
NM_015704.2	-5.62516	4.1396	0
NM_015885.3	-5.62461	3.228	0
NM_020822.2	-5.62393	-4.74294	2
NM_016301.3	-5.61906	-2.36828	1
NM_001098672.1	-5.61666	3.27623	1
NM_170692.2	-5.61433	2.30914	0
NM_001101.3	-5.60977	-18.3125	1
NM_001282387.1	-5.60817	5.57728	0
NM_001114748.1	-5.60258	-6.5739	0
NM_005151.3	-5.60238	3.99769	2
NM_018685.4	-5.60222	3.88074	0
NM_007112.4	-5.60146	-8.18194	0
NM_022760.4	-5.60123	-4.88534	0
NM_021629.3	-5.60112	-1.01842	1
NM_153332.3	-5.6003	0.443869	1
NM_005640.2	-5.60012	3.65139	0
NM_013246.2	-5.59966	-1.80134	0
NM_022903.3	-5.59845	-0.846606	1
NM_006712.4	-5.59588	-0.878719	2
NM_006281.3	-5.59486	-9.76371	1
NM_145865.2	-5.59451	-9.00584	1
NM_003921.4	-5.58647	-3.71103	1
NM_152221.2	-5.58314	4.16819	0
NM_020780.1	-5.58122	2.54017	1
NM_006910.4	-5.57813	5.52426	1
NM_013355.4	-5.57616	-2.09016	1
NM_005863.4	-5.57307	-12.7881	1
NM_004085.3	-5.57097	2.18313	0
NM_005626.4	-5.56461	-1.72815	1
NM_005523.5	-5.56255	-24.5046	1
NM_001136030.2	-5.55836	0.499483	1
NM_001145451.2	-5.5574	-1.60941	1
NM_014669.4	-5.55381	-0.798327	1
NM_022970.3	-5.55099	2.07856	0
NM_058229.3	-5.54569	-14.3191	1
NM_030573.2	-5.54146	0.312186	2
NM_021070.4	-5.54024	-2.38099	0
NM_022720.6	-5.54011	-6.87804	1
NM_000034.3	-5.54006	-6.35107	1
NM_016593.4	-5.5394	-0.418924	1
NM_152616.4	-5.53643	-2.89255	0
NM_006303.3	-5.53562	-2.35748	0
NM_001082533.1	-5.53557	-14.1821	1
NM_012308.2	-5.52978	-2.4894	0
NM_001013649.3	-5.52699	-2.18555	0
NM_182757.3	-5.5247	4.95369	0
NM_001256346.1	-5.52349	-3.3372	2
NM_007165.4	-5.5222	-32.8418	0
NM_001137550.1	-5.522	1.91064	0
NM_080817.4	-5.51933	4.32992	2
NM_001113201.2	-5.51549	-0.80728	1
NM_003721.3	-5.51446	0.918931	1
NM_014876.5	-5.50996	-8.38416	2
NM_001006636.3	-5.50884	-33.2958	1
NM_030648.3	-5.50724	-1.96571	0
NM_020240.2	-5.5068	0.860985	0
NM_021619.2	-5.50493	2.28997	0
NM_001025295.2	-5.50404	-2.41822	0
NM_152945.3	-5.49722	-6.79547	0
NM_005736.3	-5.49663	2.45534	1
NM_004497.2	-5.49587	-2.25656	0
NM_001099439.1	-5.49556	-8.46018	0
NM_000360.3	-5.49384	0.170896	0
NM_053046.3	-5.48987	1.80611	0
NM_006319.4	-5.48493	-10.268	1
NM_153206.2	-5.48271	-1.38725	1
NM_021640.3	-5.47604	-13.9233	0
NM_000033.3	-5.46902	-16.2997	1
NM_001190228.1	-5.46407	1.60215	1
NM_014717.2	-5.46318	-0.417609	1
NM_005204.3	-5.46215	-20.9903	0
NM_001142928.1	-5.45979	-0.561923	1
NM_002633.2	-5.45948	-10.6709	0
NM_024886.2	-5.45657	1.27871	2
NM_032204.4	-5.45642	-5.13577	1
NM_178548.3	-5.45553	-4.61087	0
NM_004228.6	-5.45292	-8.82234	1
NM_024012.3	-5.45174	6.30187	0
NM_014007.3	-5.45102	-1.81456	2
NM_000221.2	-5.45029	4.13373	2
NM_005813.4	-5.44876	-1.83068	1
NM_033272.3	-5.44488	-3.12157	1
NM_003473.3	-5.44086	3.912	1
NM_001650.5	-5.44033	-1.38749	0
NM_032013.3	-5.43991	-22.9849	1
NM_203495.3	-5.43786	-20.9105	1
NM_032772.5	-5.43785	6.4542	0
NM_015191.2	-5.4214	10.0798	0
NM_052939.3	-5.41957	-8.20568	2
NM_178835.4	-5.40798	-9.27815	1
NM_005953.3	-5.40765	-1.49356	2
NM_024556.3	-5.40753	0.948956	1
NM_001025930.3	-5.40323	1.61854	2
NM_033280.3	-5.39574	1.57571	0
NM_001257097.1	-5.39538	-0.524469	1
NM_001042690.1	-5.39386	2.50308	0
NM_001128827.2	-5.39304	3.18472	1
NM_175861.3	-5.39135	-12.6359	1
NM_001185090.1	-5.39057	0.678998	0
NM_014655.3	-5.38711	-6.16116	0
NM_152594.2	-5.38711	2.09741	1
NM_006324.2	-5.38626	3.68117	1
NM_005710.2	-5.38425	0.397915	1
NM_005657.2	-5.38415	0.747074	1
NM_014408.4	-5.38227	-2.23796	0
NM_058219.2	-5.37954	1.70097	0
NM_001144936.1	-5.37937	-2.2679	0
NM_001278624.1	-5.37738	-4.38479	1
NM_001001664.2	-5.37668	-4.01549	0
NM_020799.3	-5.37204	-7.2242	0
NM_004213.4	-5.36974	1.2827	0
NM_001316.3	-5.36835	-1.00922	1
NM_005063.4	-5.36258	0.44054	1
NM_213602.2	-5.35958	-14.7458	0
NM_012369.2	-5.3589	1.09242	0
NM_020162.3	-5.35123	-0.753127	0
NM_022479.2	-5.34971	0.42435	1
NM_032711.3	-5.34522	11.7607	1
NM_018945.3	-5.33784	-29.7213	0
NM_006297.2	-5.33776	-1.67766	1
NM_021999.4	-5.33064	-0.305711	1
NM_022551.2	-5.32587	1.22666	1
NM_001704.2	-5.32568	-3.77483	0
NM_014726.2	-5.3256	-9.73105	0
NM_001276501.1	-5.32264	-2.37228	1
NM_005341.3	-5.31983	7.43375	1
NM_145032.3	-5.31853	-8.20823	0
NM_001003722.1	-5.31673	4.34375	1
NM_001004439.1	-5.31495	-2.12948	0
NM_001145474.3	-5.31063	-1.52096	0
NM_025176.5	-5.30603	-12.1123	1
NM_020337.2	-5.30589	8.93383	0
NM_020870.3	-5.30538	-27.8372	1
NM_006713.3	-5.30286	2.06922	1
NM_020961.3	-5.29823	-3.39233	1
NM_004236.3	-5.29813	-8.46719	0
NM_001145783.1	-5.29805	1.17952	0
NM_001024845.2	-5.29755	-4.98709	0
NM_018134.2	-5.29213	-2.03622	1
NM_005401.4	-5.29076	-0.344397	1
NM_003615.4	-5.28228	0.00193417	1
NM_001324080.1	-5.28188	-1.16467	0
NM_020369.2	-5.28115	-9.32976	1
NM_004239.4	-5.28057	-3.73084	0
NM_005171.4	-5.28055	-8.57677	0
NM_005751.4	-5.2763	-5.66032	1
NM_017886.3	-5.27513	-26.5448	1
NM_033315.3	-5.27489	2.03449	0
NM_017440.4	-5.27205	0.60004	2
NM_004238.2	-5.27077	11.0111	0
NM_014729.2	-5.2707	3.83078	0
NM_016167.4	-5.27063	-2.83208	0
NM_002695.3	-5.26443	8.27347	0
NM_001303047.1	-5.25993	-1.34941	1
NM_015156.3	-5.25891	-0.723801	0
NM_003305.2	-5.25834	-2.4148	0
NM_032493.3	-5.25373	-1.33663	0
NM_002664.2	-5.25249	-4.74694	0
NM_198976.2	-5.24867	2.47736	0
NM_001164746.1	-5.2478	2.01172	2
NM_005510.3	-5.24674	-13.9816	1
NM_014253.3	-5.24447	0.269747	1
NM_032514.3	-5.2422	-1.31294	1
NM_016151.3	-5.24201	-1.18209	1
NM_001017980.3	-5.24016	0.955105	1
NM_017707.3	-5.2348	-2.14959	0
NM_002444.2	-5.23294	-5.01552	0
NM_001083621.1	-5.23232	-12.2344	1
NM_018337.3	-5.23105	-2.86551	0
NM_152299.3	-5.22988	1.47149	0
NM_018287.6	-5.2244	2.09916	0
NM_005907.3	-5.22161	0.273565	0
NM_001193329.1	-5.22037	1.69151	1
NM_138364.3	-5.21656	-15.4341	1
NM_203436.2	-5.21413	-2.02427	0
NM_006509.3	-5.20688	-1.78285	0
NM_001166018.1	-5.20444	-3.85143	0
NM_004444.4	-5.2033	-8.38998	1
NM_145021.5	-5.20318	-0.738893	0
NM_182767.5	-5.2022	-15.0553	1
NM_001001955.2	-5.2019	-2.52346	1
NM_006599.3	-5.19987	-16.9547	1
NM_001130690.2	-5.19796	-3.43051	1
NM_152833.2	-5.19183	-5.04498	0
NM_001322855.1	-5.18991	-3.34142	2
NM_032302.3	-5.18806	1.99179	0
NM_020126.4	-5.18647	-10.1125	1
NM_002137.3	-5.18514	4.45541	2
NM_001205272.1	-5.1836	1.08755	0
NM_013313.4	-5.18131	1.70256	0
NM_001271863.1	-5.18079	-19.8946	1
NM_014725.4	-5.17284	-2.06779	0
NM_001323252.1	-5.1723	1.96963	0
NM_012470.3	-5.171	-23.1771	1
NM_001067.3	-5.1707	-11.9508	1
NM_001161625.1	-5.17061	-0.847314	0
NM_033387.3	-5.16542	-9.79729	1
NM_001037666.2	-5.16473	-7.54281	0
NM_003787.4	-5.16388	-1.31393	0
NM_024503.4	-5.16364	-6.55874	0
NM_006694.3	-5.16337	0.387324	2
NM_178505.7	-5.1607	-3.29649	2
NM_031300.3	-5.15844	3.45075	1
NM_015076.4	-5.15797	-3.71005	1
NM_001127664.1	-5.15671	-14.3256	1
NM_004350.2	-5.15519	0.614295	0
NM_002198.2	-5.15202	-13.8364	0
NM_001008781.2	-5.1517	3.28452	0
NM_001011663.1	-5.15131	-1.27694	0
NM_017576.2	-5.14892	3.26285	1
NM_032804.5	-5.14795	3.67903	0
NM_018400.3	-5.14391	-7.9237	0
NM_138610.2	-5.14	-16.9039	0
NM_017515.4	-5.139	-1.72408	0
NM_145174.1	-5.13547	-2.13524	1
NM_005828.4	-5.13139	1.20728	1
NM_024613.3	-5.1282	-25.0942	1
NM_001080481.1	-5.11612	-5.09921	1
NM_003910.3	-5.11559	3.04774	1
NM_000688.5	-5.1118	-24.2199	1
NM_004993.5	-5.10688	-13.776	1
NM_018477.2	-5.10639	5.56419	2
NM_000382.2	-5.10617	-3.56823	0
NM_054027.4	-5.10492	4.51502	1
NM_004087.2	-5.1037	-33.8461	1
NM_178826.3	-5.10264	0.156568	1
NM_001145547.1	-5.09844	6.40827	1
NM_024658.3	-5.09843	2.91133	0
NM_001024598.3	-5.09772	-0.726297	1
NM_213607.2	-5.08897	-1.28421	1
NM_145241.4	-5.08692	0.091753	0
NM_032940.2	-5.0869	2.15984	1
NM_001040022.1	-5.08565	-2.11699	0
NM_005034.3	-5.08401	-11.4846	0
NM_007055.3	-5.08267	-7.85442	1
NM_003281.3	-5.08125	-7.65624	0
NM_002765.4	-5.08108	-2.23816	1
NM_001830.3	-5.07847	-10.5862	1
NM_021240.3	-5.07666	-5.50819	0
NM_032490.4	-5.07652	-2.02398	0
NM_017573.4	-5.07576	-4.4022	1
NM_006779.3	-5.07402	0.592589	0
NM_012096.2	-5.07269	1.5745	1
NM_020180.3	-5.07094	3.0531	0
NM_001015885.1	-5.06344	4.27152	0
NM_145206.3	-5.05697	-4.6929	1
NM_052885.3	-5.05468	-0.127851	1
NM_002654.5	-5.05112	5.82733	0
NM_006761.4	-5.04942	-21.9849	1
NM_014009.3	-5.04893	-7.19198	1
NM_182562.2	-5.04605	-13.8986	1
NM_001122838.1	-5.03868	-17.752	1
NM_001080539.1	-5.03631	-5.4026	0
NM_001311.4	-5.03265	-0.124932	2
NM_031229.3	-5.0319	6.95853	0
NM_032476.3	-5.0292	1.02201	0
NM_181356.2	-5.02509	-11.6888	1
NM_152406.3	-5.02238	5.1399	0
NM_001053.3	-5.01816	2.11016	0
NM_006196.3	-5.01657	-18.8795	1
NM_012188.4	-5.01561	-0.49002	0
NM_003827.3	-5.01317	5.04739	0
NM_001244944.1	-5.01219	-14.7684	0
NM_001254738.1	-5.01117	-3.15612	0
NM_145253.2	-5.00879	-2.39396	0
NM_020901.3	-5.0071	-21.1947	1
NM_000426.3	-5.00558	-8.29278	1
NM_138813.3	-5.00541	0.536401	0
NM_006990.4	-5.00287	-4.06722	2
NM_001145413.3	-5.00197	-2.43171	1
NM_003276.2	-4.99992	-1.72894	1
NM_001256054.2	-4.99887	-4.62596	1
NM_003930.4	-4.99816	-5.35719	1
NM_032847.2	-4.99477	-17.2553	1
NM_144613.4	-4.99293	-7.79865	1
NM_144577.3	-4.99222	-1.23521	0
NM_006554.4	-4.99066	4.22571	1
NM_001173990.2	-4.98776	1.79696	0
NM_199168.3	-4.98711	-5.0403	2
NM_001289947.1	-4.98618	-6.91894	1
NM_020145.3	-4.98442	1.09996	0
NM_024928.4	-4.98246	-0.854638	0
NM_000465.3	-4.98038	-5.94532	0
NM_001502.3	-4.98033	-4.66081	0
NM_000735.3	-4.97968	5.06027	1
NM_018018.4	-4.97869	-14.3139	0
NM_139246.4	-4.9594	2.67849	1
NM_020863.3	-4.95933	-4.49426	0
NM_002463.1	-4.95635	-0.841879	0
NM_012134.2	-4.9532	-2.80384	0
NM_001142274.1	-4.95181	-18.9255	0
NM_014909.4	-4.95133	0.426678	1
NM_015302.1	-4.94858	0.155473	0
NM_014734.3	-4.9477	3.58498	1
NM_053284.2	-4.94765	-13.2635	0
NM_022780.3	-4.94645	2.79822	1
NM_006391.2	-4.94458	-6.79028	0
NM_004143.3	-4.939	-6.73761	1
NM_003667.3	-4.93696	2.4923	0
NM_023940.2	-4.93661	-0.506977	0
NM_058179.3	-4.93569	-2.78964	0
NM_182985.4	-4.93528	2.5429	1
NM_014949.3	-4.93527	0.63701	2
NM_080599.2	-4.9314	-0.945341	0
NM_030973.3	-4.92967	-10.4746	1
NM_004686.4	-4.92844	0.174705	1
NM_001012267.2	-4.92429	0.913107	2
NM_013318.3	-4.91992	-0.636953	1
NM_207360.2	-4.91901	-1.67461	0
NM_002042.4	-4.91773	-1.10516	0
NM_182751.2	-4.91711	-11.0703	1
NM_002373.5	-4.91637	0.405591	1
NM_003992.4	-4.9127	-4.36246	2
NM_138439.2	-4.91142	1.09324	0
NM_014209.3	-4.91106	-3.72682	1
NM_001257268.1	-4.91003	-16.8674	0
NM_014071.4	-4.90965	-25.9421	1
NM_001197109.1	-4.90294	-3.01772	1
NM_080677.2	-4.90264	-4.25111	0
NM_001135055.2	-4.90163	2.04957	2
NM_181489.5	-4.90098	-4.83237	1
NM_145047.4	-4.89693	0.905856	0
NM_152597.4	-4.89674	-8.44494	1
NM_005215.3	-4.8965	-23.3094	2
NM_032957.4	-4.89617	-11.7129	1
NM_171998.3	-4.89613	1.32696	1
NM_032348.3	-4.8959	-13.5695	0
NM_054114.4	-4.8954	-1.456	1
NM_022662.3	-4.89281	-22.668	1
NM_203505.2	-4.89184	-9.49312	0
NM_013417.3	-4.88686	-0.849615	2
NM_014851.3	-4.88394	0.606057	0
NM_020726.4	-4.8831	3.05305	0
NM_005687.4	-4.88197	-21.4882	1
NM_001887.3	-4.88158	2.42702	0
NM_003301.5	-4.87439	-5.96812	0
NM_145663.2	-4.87217	-0.227651	0
NM_006646.5	-4.87159	-9.99095	2
NM_005805.5	-4.87133	-2.80763	0
NM_006953.3	-4.87045	-12.7873	0
NM_031372.3	-4.87003	-1.98778	1
NM_001414.3	-4.86778	-2.01784	0
NM_001690.3	-4.8613	-9.33639	1
NM_004489.4	-4.85787	2.33075	0
NM_031288.3	-4.85713	-6.62375	0
NM_001282322.1	-4.85582	-2.10697	1
NM_021198.2	-4.85575	0.190799	1
NM_018039.2	-4.85461	0.540896	0
NM_152774.3	-4.8544	-4.73265	0
NM_022063.2	-4.85255	-4.47087	1
NM_022835.2	-4.85234	3.28541	0
NM_001145160.1	-4.85178	5.65964	0
NM_030762.2	-4.84615	-20.1858	0
NM_152295.4	-4.84439	0.999893	0
NM_182691.2	-4.84121	-4.66353	1
NM_080744.1	-4.8399	-0.049158	0
NM_005761.2	-4.83591	1.2677	0
NM_006113.4	-4.83548	-3.71217	1
NM_001165928.3	-4.83422	1.92658	0
NM_006650.3	-4.8335	0.969073	0
NM_005744.3	-4.83192	1.22959	1
NM_145018.3	-4.83133	-1.03785	2
NM_021831.5	-4.82612	0.562948	1
NM_017913.3	-4.8259	2.28372	0
NM_199344.2	-4.82412	0.320411	0
NM_173666.3	-4.82102	-3.61803	2
NM_001142459.1	-4.81994	-2.0982	0
NM_024074.2	-4.8199	-0.0292143	1
NM_004448.3	-4.81286	0.433388	0
NM_207034.2	-4.81164	-0.965869	1
NM_015315.4	-4.80564	0.864037	1
NM_007008.2	-4.80437	-8.8537	1
NM_001197026.1	-4.80318	-4.27284	2
NM_001160258.1	-4.80247	2.85074	1
NM_144583.3	-4.80011	-2.15606	0
NM_001356.4	-4.79948	2.21296	1
NM_006305.3	-4.79841	-1.01855	0
NM_002338.4	-4.79342	1.79745	1
NM_001229.4	-4.79155	-1.69905	0
NM_207510.3	-4.79137	-0.627595	1
NM_018310.3	-4.79009	3.41097	0
NM_005540.2	-4.78778	8.29345	0
NM_002480.2	-4.78682	13.291	0
NM_021227.3	-4.78628	-8.22346	2
NM_032313.3	-4.78614	1.1578	1
NM_005303.2	-4.7837	-4.35797	1
NM_014867.2	-4.78364	-1.7578	0
NM_001261835.1	-4.77914	-4.25141	0
NM_018073.7	-4.77569	-9.57286	0
NM_001130072.1	-4.7723	-2.88608	0
NM_018171.3	-4.77073	2.68821	1
NM_005694.1	-4.76896	-3.01914	1
NM_001174084.1	-4.76744	-8.71759	1
NM_002719.3	-4.76725	0.970218	2
NM_024016.3	-4.76574	-0.657476	1
NM_001094.4	-4.7657	-1.63776	1
NM_006442.3	-4.76394	3.62918	0
NM_145173.3	-4.75875	0.418836	0
NM_015694.2	-4.75827	-9.30441	0
NM_194071.3	-4.75753	1.10488	0
NM_145313.3	-4.75552	-0.81661	0
NM_001113349.1	-4.75386	-3.64418	0
NM_015322.4	-4.75218	-1.66185	1
NM_152385.2	-4.7507	3.39292	1
NM_032259.3	-4.75055	-0.0400254	0
NM_003427.4	-4.75053	0.237029	1
NM_030941.2	-4.74925	-0.636756	0
NM_021633.3	-4.74916	6.96141	0
NM_001004303.4	-4.74804	-9.36286	1
NM_002698.4	-4.74771	1.71862	0
NM_203500.1	-4.74332	0.932383	0
NM_171982.4	-4.74296	-3.03092	0
NM_032876.5	-4.74072	-3.05346	1
NM_015183.2	-4.73856	-22.6394	1
NM_031480.2	-4.73686	-10.5415	0
NM_001883.4	-4.73529	-5.13307	1
NM_005165.2	-4.73339	-10.1194	1
NM_005521.3	-4.73064	-15.1327	0
NM_016291.3	-4.73007	-7.10819	0
NM_170707.3	-4.72925	-0.425472	1
NM_139164.2	-4.72841	-4.16688	1
NM_194328.2	-4.7261	4.02381	2
NM_002585.3	-4.72436	-10.2636	0
NM_018170.4	-4.72366	-11.2171	1
NM_001624.3	-4.72182	-1.78354	1
NM_080656.2	-4.72174	-3.98077	2
NM_001252634.1	-4.71995	2.66443	0
NM_017799.3	-4.71922	1.28266	1
NM_198526.3	-4.71879	-10.0171	0
NM_176812.4	-4.71702	2.64407	0
NM_152268.3	-4.71517	5.40877	2
NM_004346.3	-4.7144	-10.5692	1
NM_016222.3	-4.71059	-1.413	1
NM_001040715.1	-4.71027	-26.3486	1
NM_002844.3	-4.70696	-18.5278	1
NM_002154.3	-4.70682	-5.06735	1
NM_001707.3	-4.70565	5.19652	0
NM_016506.6	-4.7021	-5.57051	0
NM_153347.2	-4.70144	-2.3167	1
NM_001136534.1	-4.70139	3.35948	1
NM_024794.2	-4.70049	-5.31997	0
NM_175738.4	-4.69997	-16.8385	1
NM_015889.4	-4.69714	-2.82588	1
NM_002764.3	-4.6917	-0.338818	1
NM_138576.3	-4.68969	0.344128	1
NM_013448.2	-4.68898	2.74595	1
NM_001128591.1	-4.68723	-1.28457	0
NM_014383.2	-4.68723	0.851181	1
NM_018193.2	-4.68628	-8.16396	0
NM_004861.2	-4.68414	-0.463549	0
NM_152586.3	-4.68369	-0.652505	0
NM_002242.4	-4.68098	-2.96367	0
NM_001024599.4	-4.67833	2.05823	0
NM_007054.6	-4.67746	-2.59154	1
NM_001143936.1	-4.67631	-15.9552	1
NM_203487.2	-4.67147	-0.277397	1
NM_001271749.1	-4.6705	2.76187	1
NM_015879.2	-4.67027	5.63457	0
NM_018444.3	-4.66995	4.33934	1
NM_013293.4	-4.66945	0.960234	1
NM_006233.4	-4.66785	2.90268	2
NM_017420.4	-4.66719	6.00659	1
NM_007010.4	-4.66591	1.49918	1
NM_001301746.1	-4.66501	-0.0774521	1
NM_032251.5	-4.66459	1.37575	1
NM_022770.3	-4.66332	-1.12163	0
NM_017610.7	-4.66242	-3.17953	2
NM_138775.2	-4.66106	-0.639262	1
NM_005338.6	-4.65994	-0.0657571	0
NM_004204.3	-4.65951	-3.17173	1
NM_020248.2	-4.65897	4.57154	0
NM_004991.3	-4.65621	-3.69462	1
NM_003687.3	-4.65431	-11.5288	1
NM_004293.4	-4.65064	-7.1518	0
NM_001533.2	-4.64876	-2.31432	0
NM_032299.3	-4.64801	-25.8832	1
NM_000333.3	-4.64626	-1.28162	1
NM_032933.5	-4.64606	1.48437	1
NM_002465.3	-4.64483	0.762014	1
NM_000959.3	-4.6442	-10.9508	0
NM_178123.4	-4.64319	-2.55577	2
NM_017943.3	-4.64242	-8.74223	0
NM_002827.3	-4.6393	-1.66003	0
NM_020649.2	-4.63891	-11.2014	0
NM_016004.4	-4.63214	-7.3395	1
NM_002953.3	-4.63213	-5.2738	0
NM_001170331.1	-4.63068	1.05311	1
NM_001080479.2	-4.62542	-0.688613	0
NM_021008.3	-4.625	2.34803	0
NM_003750.2	-4.62232	-3.25362	1
NM_014323.2	-4.61963	1.12556	0
NM_012458.3	-4.61551	-0.639815	0
NM_032515.4	-4.61465	-1.27992	0
NM_001200049.2	-4.61209	2.16974	1
NM_018313.4	-4.60945	-19.9486	1
NM_144631.5	-4.60779	-2.2904	2
NM_175911.3	-4.60748	-0.999474	2
NM_005135.2	-4.60608	-4.06912	1
NM_015225.2	-4.6058	-8.70005	1
NM_139179.3	-4.60303	-4.13627	0
NM_015517.4	-4.60001	-3.90345	0
NM_012406.3	-4.59889	-0.209316	0
NM_015711.3	-4.5954	-23.7467	1
NM_021813.3	-4.59463	-39.1059	1
NM_032858.2	-4.5928	-5.119	1
NM_001193314.1	-4.59131	-4.15125	1
NM_014368.4	-4.59088	-2.49147	1
NM_001079.3	-4.58725	2.84527	0
NM_016603.3	-4.58466	-17.5125	1
NM_178140.3	-4.58407	-2.17058	1
NM_005930.3	-4.58391	-0.867465	0
NM_153002.2	-4.58216	-10.3448	1
NM_001174072.2	-4.57941	-8.24366	0
NM_003092.4	-4.57781	-1.67192	0
NM_005562.2	-4.57561	2.36423	1
NM_000085.4	-4.57554	-0.220339	0
NM_006738.5	-4.57505	-19.1553	1
NM_001042784.1	-4.57481	-1.70465	1
NM_032037.3	-4.5741	-2.17299	0
NM_002388.4	-4.57106	1.61295	0
NM_002966.2	-4.5699	-4.80236	0
NM_207454.2	-4.56756	0.267834	0
NM_001271788.1	-4.56389	-1.21936	0
NM_006943.3	-4.56193	-5.82042	0
NM_001048252.2	-4.56172	-20.1809	1
NM_014611.2	-4.56104	-3.04167	1
NM_032387.4	-4.5573	-3.05906	0
NM_003371.3	-4.55652	-1.41271	0
NM_002962.1	-4.55483	-3.9234	0
NM_153215.2	-4.55318	-0.866541	0
NM_003709.3	-4.55015	-7.28293	2
NM_001039885.2	-4.54904	-7.02225	1
NM_003466.3	-4.54621	-3.20566	1
NM_016618.2	-4.54515	-4.07678	1
NM_015060.2	-4.54414	3.33049	1
NM_021951.2	-4.54246	-12.4407	0
NM_017794.4	-4.54179	-10.503	1
NM_000911.3	-4.54144	-2.87074	1
NM_000791.3	-4.54058	2.17311	0
NM_024040.2	-4.53982	-19.9361	1
NM_002232.4	-4.53571	0.273642	0
NM_001488.4	-4.53375	3.40028	1
NM_005460.3	-4.53252	-32.5101	1
NM_180990.3	-4.5313	2.34459	0
NM_014003.3	-4.53073	-1.20124	1
NM_015627.2	-4.53064	-1.95535	0
NM_001204173.1	-4.52874	-1.63548	0
NM_005722.3	-4.52791	0.64364	1
NM_005662.6	-4.52271	-2.09107	1
NM_001145080.2	-4.51895	1.47576	0
NM_032344.3	-4.51479	-4.42274	1
NM_001099270.1	-4.51197	-17.4298	1
NM_004176.4	-4.51039	1.70364	0
NM_018420.2	-4.50906	0.762518	0
NM_022406.3	-4.50901	-9.04095	1
NM_015172.3	-4.50799	-1.31385	1
NM_138737.4	-4.50714	-2.22331	1
NM_173625.4	-4.50512	-12.8924	1
NM_152723.2	-4.5041	-1.4018	0
NM_014313.3	-4.50397	-0.850843	2
NM_001163561.1	-4.50325	-2.47955	2
NM_006868.3	-4.50012	5.90658	0
NM_003312.5	-4.50006	0.173621	0
NM_015206.2	-4.49822	1.40262	0
NM_207342.2	-4.49704	-0.363501	0
NM_005283.2	-4.49257	0.180898	1
NM_001171948.1	-4.48828	-3.66137	0
NM_207406.3	-4.48706	3.37029	0
NM_006769.3	-4.48171	-13.6469	1
NM_003993.3	-4.47986	-0.160626	1
NM_001173524.1	-4.47935	0.25841	0
NM_000971.3	-4.47609	1.11369	0
NM_006269.1	-4.47208	-35.6536	1
NM_020826.2	-4.47085	-5.17095	0
NM_001252507.2	-4.46653	-3.66671	0
NM_170665.3	-4.46635	1.66396	2
NM_021998.4	-4.46559	7.95205	0
NM_005178.4	-4.46497	-3.91717	2
NM_000875.4	-4.46418	2.30799	0
NM_012141.2	-4.46272	-5.44819	0
NM_001310.3	-4.46248	-11.0725	1
NM_001240.3	-4.46112	2.75371	0
NM_013450.3	-4.4611	-3.52183	2
NM_001020.5	-4.45663	3.03137	1
NM_015939.4	-4.45036	-2.26179	1
NM_002033.3	-4.4498	-0.823926	1
NM_005477.2	-4.44876	-10.2537	0
NM_005915.5	-4.44859	-4.20898	1
NM_003211.4	-4.4485	2.75118	0
NM_001457.3	-4.4479	-8.45139	0
NM_012121.4	-4.44717	2.01284	0
NM_003558.3	-4.44652	-1.67685	1
NM_017739.3	-4.44622	-5.45676	1
NM_002917.1	-4.44604	-0.281503	0
NM_001251962.1	-4.44583	-1.41977	1
NM_013285.2	-4.44578	-3.51925	0
NM_058243.2	-4.44274	1.41048	0
NM_005498.4	-4.44221	-2.25238	1
NM_152266.4	-4.44139	-0.111231	1
NM_001362.3	-4.44053	2.17981	0
NM_031435.3	-4.43969	-2.00067	2
NM_004525.2	-4.4361	-2.00313	2
NM_004811.2	-4.43291	-23.1878	1
NM_001114974.1	-4.43278	2.53662	0
NM_152793.2	-4.43157	-1.12053	2
NM_005922.3	-4.4304	-4.36345	0
NM_015072.4	-4.42888	6.94163	0
NM_001290.4	-4.42359	-0.480464	1
NM_000345.3	-4.42206	-20.5023	1
NM_016589.3	-4.42051	-2.5363	2
NM_001004065.4	-4.41794	1.03377	1
NM_001083893.1	-4.41523	5.46331	0
NM_001243646.1	-4.41044	-3.45377	1
NM_016065.3	-4.41024	4.04836	1
NM_015714.3	-4.40759	0.87688	0
NM_153485.2	-4.40384	-5.69972	0
