# Supplementary material for: Translation initiation downstream from annotated start codons in human mRNAs coevolves with the Kozak context
Source: Genome Res. 2020 Jul;30(7):974–84. doi: 10.1101/gr.257352.119 (PMC7397870; doi:10.1101/gr.257352.119)
Supplement: Supplemental Material [file supp_gr.257352.119_Supplemental_Table_S5.xlsx]

## Sheet: Supplemental_Table_S5
Supplemental Table S5. Studies used in the ribosome profiling analysis.
Elongating Ribo-seq		Initiating Ribo-seq		RNA-seq
Description	Accession	Description	Accession	Description	Accession
Andreev15	GSE55195	Crappe15	SRP042937	Andreev15	GSE55195
Arango18	GSE102113	Fijalkowska17	GSE87328	Arango	GSE102113
Battle15	GSE61742	Gao14	SRA160745	Battle15	GSE61742
Calviello16	GSE73136	Gawron16	SRP065022	Cenik15	GSE65912
Cenik15	GSE65912	Park16	GSE79664	Elkon15	SRP056084
Crappe15	SRP042937	Raj16	GSE75290	Fijalkowska17	GSE87328
Elkon15	SRP056200	Zhang17	GSE94460	Gameiro18	GSE114794
Fijalkowska17	GSE87328			Gao14	SRA160745
Gamerio18	GSE114794			Guo14	GSE51584
Gao14	SRA160745			Iwasaki16	GSE70211
Gawron16	SRP065022			Jakobsson17	GSE97140
Guo14	GSE51584			Jang15	GSE56924
Ingolia12	SRP012648)			Ji15	GSE65885
Iwaski16	GSE70211			Khajuria18	GSE89183
Jakobsson17	GSE97140			Lauria18	GSE111866
Jang15	GSE56924			Niu13	SRP028325
Ji15	GSE65885			Oh16	GSE70804
Khajuria18	GSE89183			Park16	GSE79664
Lauria18	GSE111866			Park17	GSE97384
Malecki17	SRP096025			Rubio14	GSE61375
Mills16	GSE85864			Shi17	GSE86214
Niu13	SRP028325			Sidrauski15	GSE65778
Oh16	GSE70804			Su15	GSE66810
Park16	GSE79664			Tanenbaum15	GSE67902
Park17	GSE97384			Tirosh15	GSE69906
Reid15	SRP057384			Wein14	GSE56148
Rubio14	GSE61375			Werner15	GSE62247
Shi17	GSE86214			Witta13	GSE48785
Sidrauski15	GSE65778			Wolfe14	GSE56887
Su15	GSE66810			Xu16	GSE64962
Tanenbaum15	GSE67902			Zur16	GSE73565
Tirosh15	GSE69906
Wein14	GSE56148
Werner15	GSE62247
Witta13	GSE48785
Wolfe14	GSE56887
Xu16	GSE64962
Yoon14	GSE52977
Zhang17	GSE94460
Zur16	GSE73565
