# Supplementary material for: Translation initiation downstream from annotated start codons in human mRNAs coevolves with the Kozak context
Source: Genome Res. 2020 Jul;30(7):974–84. doi: 10.1101/gr.257352.119 (PMC7397870; doi:10.1101/gr.257352.119)
Supplement: Supplemental Material [file supp_gr.257352.119_Supplemental_Table_S6.xlsx]

## Sheet: Supplemental_Table_S6
Supplemental Table S6. Studies used for ribosome footprint density visualization.
Study name (Trips-Viz internal)	GSE accession	PubMed ID
Gawron16	GSE74279	26893308
Gonzalez14	GSE51424	25122893
Jakobsson17	GSE97140	28520920
Battle15	GSE61742	25657249
Xu16	GSE64962	26729373
Park17	GSE97384	28494858
Park16	GSE79664	27153541
Werner15	GSE62247	26399832
Pickrell10	GSE19480	20220758
Andreev15	GSE55195	25621764
Shi17	GSE86214	28106072
Ji16	GSE65885	26900662
Elkon15	GSE66927	26538417
Calviello16	GSE73136	26657557
Guo14	GSE51584	25070500
Kirchner17	GSE74365	28510592
Iwasaki16	GSE70211	27309803
Crappe15	GSE58207	25510491
Sidrauski15	GSE65778	25719440
Tirosh15	GSE69906	26599541
Cenik15	GSE65912	26297486
Zur16	GSE73565	26898226
Zhang17	GSE94460	29170441
Li17		29107537
Oh16	GSE70804	27058758
LoayzaPuch16	GSE59821	26878238
Khajuria18	GSE89183	29551269
Lauria18	GSE111866	30102689
Fijalkowska17	GSE87328	28541577
Rubio14	GSE61375	25273840
Gameiro18	GSE114794	30089253
Goodarzi16	GSE77347	27259150
Arango18	GSE102113	30449621
Wolfe14	GSE56887	25079319
SternGinossar12	GSE41605	23180859
Dai17		28003488
BerkovichKinori16	GSE82232	27525483
Reid18	GSE69602	29321322
Iwasaki19	GSE102720	30595437
